# Supplementary material for: The somatic mutation landscape of premalignant colorectal adenoma
Source: PubMed Central journal article supplement — Gut. 2017 Jun 12;67(7):1299–305. doi: 10.1136/gutjnl-2016-313573 (PMC6031265; doi:10.1136/gutjnl-2016-313573), 2017-06-12
Supplement: gutjnl-2016-313573supp002.pdf [file gutjnl-2016-313573supp002.pdf]

**Supplementary Table S1. Genes in the custom capture panel for targeted sequencing. LIT:** colorectal cancer related genes reported in literature. **SMG:** significantly mutated genes from TCGA colorectal cancer study. **CNV:** randomly selected genes from regions with recurrent copy number variation in TCGA colorectal cancer study. **DRV:** driver genes suggested by Vogelstein *et al.*, 2013.

| Type | RefSeq ID | Hugo symbol | chromosome | exon starts | exon ends |
|------|-----------|-------------|------------|-------------|-----------|
| LIT  | NM_005502 | ABCA1       | chr9       | 107543283   | 107546736 |
| LIT  | NM_005502 | ABCA1       | chr9       | 107547676   | 107547920 |
| LIT  | NM_005502 | ABCA1       | chr9       | 107548578   | 107548671 |
| LIT  | NM_005502 | ABCA1       | chr9       | 107549153   | 107549257 |
| LIT  | NM_005502 | ABCA1       | chr9       | 107550200   | 107550335 |
| LIT  | NM_005502 | ABCA1       | chr9       | 107550706   | 107550848 |
| LIT  | NM_005502 | ABCA1       | chr9       | 107553202   | 107553309 |
| LIT  | NM_005502 | ABCA1       | chr9       | 107554216   | 107554279 |
| LIT  | NM_005502 | ABCA1       | chr9       | 107555066   | 107555187 |
| LIT  | NM_005502 | ABCA1       | chr9       | 107555451   | 107555581 |
| LIT  | NM_005502 | ABCA1       | chr9       | 107556667   | 107556791 |
| LIT  | NM_005502 | ABCA1       | chr9       | 107558333   | 107558478 |
| LIT  | NM_005502 | ABCA1       | chr9       | 107558589   | 107558705 |
| LIT  | NM_005502 | ABCA1       | chr9       | 107560701   | 107560879 |
| LIT  | NM_005502 | ABCA1       | chr9       | 107562099   | 107562269 |
| LIT  | NM_005502 | ABCA1       | chr9       | 107562790   | 107562865 |
| LIT  | NM_005502 | ABCA1       | chr9       | 107564334   | 107564440 |
| LIT  | NM_005502 | ABCA1       | chr9       | 107565564   | 107565597 |
| LIT  | NM_005502 | ABCA1       | chr9       | 107566906   | 107567001 |
| LIT  | NM_005502 | ABCA1       | chr9       | 107568521   | 107568711 |
| LIT  | NM_005502 | ABCA1       | chr9       | 107571746   | 107571845 |
| LIT  | NM_005502 | ABCA1       | chr9       | 107573080   | 107573205 |
| LIT  | NM_005502 | ABCA1       | chr9       | 107574854   | 107575003 |
| LIT  | NM_005502 | ABCA1       | chr9       | 107576398   | 107576512 |
| LIT  | NM_005502 | ABCA1       | chr9       | 107576707   | 107576756 |
| LIT  | NM_005502 | ABCA1       | chr9       | 107578423   | 107578626 |
| LIT  | NM_005502 | ABCA1       | chr9       | 107579612   | 107579685 |
| LIT  | NM_005502 | ABCA1       | chr9       | 107580943   | 107581164 |
| LIT  | NM_005502 | ABCA1       | chr9       | 107581866   | 107582004 |
| LIT  | NM_005502 | ABCA1       | chr9       | 107582207   | 107582350 |
| LIT  | NM_005502 | ABCA1       | chr9       | 107583655   | 107583787 |
| LIT  | NM_005502 | ABCA1       | chr9       | 107584776   | 107584948 |
| LIT  | NM_005502 | ABCA1       | chr9       | 107586745   | 107586859 |
| LIT  | NM_005502 | ABCA1       | chr9       | 107587963   | 107588168 |
| LIT  | NM_005502 | ABCA1       | chr9       | 107589228   | 107589450 |
| LIT  | NM_005502 | ABCA1       | chr9       | 107591196   | 107591419 |
| LIT  | NM_005502 | ABCA1       | chr9       | 107593205   | 107593382 |

|     |              |       |       |           |           |
|-----|--------------|-------|-------|-----------|-----------|
| LIT | NM_005502    | ABCA1 | chr9  | 107593902 | 107594108 |
| LIT | NM_005502    | ABCA1 | chr9  | 107594854 | 107595052 |
| LIT | NM_005502    | ABCA1 | chr9  | 107599260 | 107599377 |
| LIT | NM_005502    | ABCA1 | chr9  | 107599708 | 107599848 |
| LIT | NM_005502    | ABCA1 | chr9  | 107602559 | 107602800 |
| LIT | NM_005502    | ABCA1 | chr9  | 107607757 | 107607850 |
| LIT | NM_005502    | ABCA1 | chr9  | 107620802 | 107620979 |
| LIT | NM_005502    | ABCA1 | chr9  | 107623959 | 107624081 |
| LIT | NM_005502    | ABCA1 | chr9  | 107645319 | 107645438 |
| LIT | NM_005502    | ABCA1 | chr9  | 107646707 | 107646849 |
| LIT | NM_005502    | ABCA1 | chr9  | 107651382 | 107651476 |
| LIT | NM_005502    | ABCA1 | chr9  | 107665894 | 107666052 |
| LIT | NM_005502    | ABCA1 | chr9  | 107690215 | 107690527 |
| LIT | NM_001012750 | ABI1  | chr10 | 27035524  | 27037674  |
| LIT | NM_001012750 | ABI1  | chr10 | 27040526  | 27040712  |
| LIT | NM_001012750 | ABI1  | chr10 | 27044583  | 27044670  |
| LIT | NM_001012750 | ABI1  | chr10 | 27047990  | 27048167  |
| LIT | NM_001012750 | ABI1  | chr10 | 27054146  | 27054247  |
| LIT | NM_001012750 | ABI1  | chr10 | 27057780  | 27057921  |
| LIT | NM_001012750 | ABI1  | chr10 | 27059173  | 27059274  |
| LIT | NM_001012750 | ABI1  | chr10 | 27060003  | 27060018  |
| LIT | NM_001012750 | ABI1  | chr10 | 27065993  | 27066170  |
| LIT | NM_001012750 | ABI1  | chr10 | 27112066  | 27112234  |
| LIT | NM_001012750 | ABI1  | chr10 | 27149675  | 27150016  |
| DRV | NM_007313    | ABL1  | chr9  | 133589267 | 133589842 |
| DRV | NM_007313    | ABL1  | chr9  | 133729450 | 133729624 |
| DRV | NM_007313    | ABL1  | chr9  | 133730187 | 133730483 |
| DRV | NM_007313    | ABL1  | chr9  | 133738149 | 133738422 |
| DRV | NM_007313    | ABL1  | chr9  | 133747515 | 133747600 |
| DRV | NM_007313    | ABL1  | chr9  | 133748246 | 133748424 |
| DRV | NM_007313    | ABL1  | chr9  | 133750254 | 133750439 |
| DRV | NM_007313    | ABL1  | chr9  | 133753801 | 133753954 |
| DRV | NM_007313    | ABL1  | chr9  | 133755454 | 133755544 |
| DRV | NM_007313    | ABL1  | chr9  | 133755886 | 133756051 |
| DRV | NM_007313    | ABL1  | chr9  | 133759355 | 133763062 |
| SMG | NM_001296    | ACKR2 | chr3  | 42850963  | 42851024  |
| SMG | NM_001296    | ACKR2 | chr3  | 42861122  | 42861203  |
| SMG | NM_001296    | ACKR2 | chr3  | 42905957  | 42908775  |
| SMG | NM_152331    | ACOT4 | chr14 | 74058409  | 74059120  |
| SMG | NM_152331    | ACOT4 | chr14 | 74060405  | 74060608  |
| SMG | NM_152331    | ACOT4 | chr14 | 74061752  | 74062470  |
| LIT | NM_016234    | ACSL5 | chr10 | 114135955 | 114136206 |
| LIT | NM_016234    | ACSL5 | chr10 | 114154675 | 114154860 |

|     |           |        |       |           |           |
|-----|-----------|--------|-------|-----------|-----------|
| LIT | NM_016234 | ACSL5  | chr10 | 114158658 | 114158767 |
| LIT | NM_016234 | ACSL5  | chr10 | 114164268 | 114164333 |
| LIT | NM_016234 | ACSL5  | chr10 | 114164462 | 114164564 |
| LIT | NM_016234 | ACSL5  | chr10 | 114168179 | 114168279 |
| LIT | NM_016234 | ACSL5  | chr10 | 114169264 | 114169443 |
| LIT | NM_016234 | ACSL5  | chr10 | 114170220 | 114170253 |
| LIT | NM_016234 | ACSL5  | chr10 | 114170341 | 114170393 |
| LIT | NM_016234 | ACSL5  | chr10 | 114171213 | 114171287 |
| LIT | NM_016234 | ACSL5  | chr10 | 114171659 | 114171737 |
| LIT | NM_016234 | ACSL5  | chr10 | 114172930 | 114173065 |
| LIT | NM_016234 | ACSL5  | chr10 | 114176645 | 114176780 |
| LIT | NM_016234 | ACSL5  | chr10 | 114177603 | 114177699 |
| LIT | NM_016234 | ACSL5  | chr10 | 114181350 | 114181423 |
| LIT | NM_016234 | ACSL5  | chr10 | 114181704 | 114181793 |
| LIT | NM_016234 | ACSL5  | chr10 | 114182082 | 114182199 |
| LIT | NM_016234 | ACSL5  | chr10 | 114185095 | 114185239 |
| LIT | NM_016234 | ACSL5  | chr10 | 114186015 | 114186117 |
| LIT | NM_016234 | ACSL5  | chr10 | 114186545 | 114186617 |
| LIT | NM_016234 | ACSL5  | chr10 | 114186975 | 114188138 |
| SMG | NM_024560 | ACSS3  | chr12 | 81471808  | 81472210  |
| SMG | NM_024560 | ACSS3  | chr12 | 81503338  | 81503483  |
| SMG | NM_024560 | ACSS3  | chr12 | 81528594  | 81528783  |
| SMG | NM_024560 | ACSS3  | chr12 | 81532909  | 81533044  |
| SMG | NM_024560 | ACSS3  | chr12 | 81536885  | 81537026  |
| SMG | NM_024560 | ACSS3  | chr12 | 81545622  | 81545703  |
| SMG | NM_024560 | ACSS3  | chr12 | 81545779  | 81545875  |
| SMG | NM_024560 | ACSS3  | chr12 | 81568566  | 81568718  |
| SMG | NM_024560 | ACSS3  | chr12 | 81593119  | 81593223  |
| SMG | NM_024560 | ACSS3  | chr12 | 81610679  | 81610775  |
| SMG | NM_024560 | ACSS3  | chr12 | 81613791  | 81613855  |
| SMG | NM_024560 | ACSS3  | chr12 | 81624835  | 81624917  |
| SMG | NM_024560 | ACSS3  | chr12 | 81627127  | 81627250  |
| SMG | NM_024560 | ACSS3  | chr12 | 81647085  | 81647185  |
| SMG | NM_024560 | ACSS3  | chr12 | 81647273  | 81647449  |
| SMG | NM_024560 | ACSS3  | chr12 | 81648635  | 81649582  |
| LIT | NM_178525 | ACTL9  | chr19 | 8807746   | 8809180   |
| SMG | NM_004302 | ACVR1B | chr12 | 52345450  | 52345618  |
| SMG | NM_004302 | ACVR1B | chr12 | 52369048  | 52369288  |
| SMG | NM_004302 | ACVR1B | chr12 | 52370110  | 52370359  |
| SMG | NM_004302 | ACVR1B | chr12 | 52374752  | 52374983  |
| SMG | NM_004302 | ACVR1B | chr12 | 52377782  | 52377950  |
| SMG | NM_004302 | ACVR1B | chr12 | 52378975  | 52379132  |
| SMG | NM_004302 | ACVR1B | chr12 | 52380601  | 52380726  |

|     |              |        |       |           |           |
|-----|--------------|--------|-------|-----------|-----------|
| SMG | NM_004302    | ACVR1B | chr12 | 52385646  | 52385777  |
| SMG | NM_004302    | ACVR1B | chr12 | 52387768  | 52390863  |
| SMG | NM_001278579 | ACVR2A | chr2  | 148602085 | 148602275 |
| SMG | NM_001278579 | ACVR2A | chr2  | 148602642 | 148602776 |
| SMG | NM_001278579 | ACVR2A | chr2  | 148653869 | 148654077 |
| SMG | NM_001278579 | ACVR2A | chr2  | 148657026 | 148657136 |
| SMG | NM_001278579 | ACVR2A | chr2  | 148657312 | 148657467 |
| SMG | NM_001278579 | ACVR2A | chr2  | 148672759 | 148672903 |
| SMG | NM_001278579 | ACVR2A | chr2  | 148674851 | 148674995 |
| SMG | NM_001278579 | ACVR2A | chr2  | 148676015 | 148676161 |
| SMG | NM_001278579 | ACVR2A | chr2  | 148677798 | 148677913 |
| SMG | NM_001278579 | ACVR2A | chr2  | 148680541 | 148680680 |
| SMG | NM_001278579 | ACVR2A | chr2  | 148683599 | 148683730 |
| SMG | NM_001278579 | ACVR2A | chr2  | 148684648 | 148688396 |
| SMG | NM_002390    | ADAM11 | chr17 | 42836567  | 42836628  |
| SMG | NM_002390    | ADAM11 | chr17 | 42837089  | 42837265  |
| SMG | NM_002390    | ADAM11 | chr17 | 42847085  | 42847162  |
| SMG | NM_002390    | ADAM11 | chr17 | 42847349  | 42847416  |
| SMG | NM_002390    | ADAM11 | chr17 | 42848951  | 42849037  |
| SMG | NM_002390    | ADAM11 | chr17 | 42849123  | 42849199  |
| SMG | NM_002390    | ADAM11 | chr17 | 42849634  | 42849701  |
| SMG | NM_002390    | ADAM11 | chr17 | 42849766  | 42849834  |
| SMG | NM_002390    | ADAM11 | chr17 | 42850224  | 42850299  |
| SMG | NM_002390    | ADAM11 | chr17 | 42850381  | 42850453  |
| SMG | NM_002390    | ADAM11 | chr17 | 42850628  | 42850795  |
| SMG | NM_002390    | ADAM11 | chr17 | 42851662  | 42851747  |
| SMG | NM_002390    | ADAM11 | chr17 | 42851859  | 42851950  |
| SMG | NM_002390    | ADAM11 | chr17 | 42852065  | 42852117  |
| SMG | NM_002390    | ADAM11 | chr17 | 42852579  | 42852679  |
| SMG | NM_002390    | ADAM11 | chr17 | 42852761  | 42852833  |
| SMG | NM_002390    | ADAM11 | chr17 | 42852951  | 42853044  |
| SMG | NM_002390    | ADAM11 | chr17 | 42853494  | 42853575  |
| SMG | NM_002390    | ADAM11 | chr17 | 42854112  | 42854163  |
| SMG | NM_002390    | ADAM11 | chr17 | 42854266  | 42854330  |
| SMG | NM_002390    | ADAM11 | chr17 | 42854533  | 42854633  |
| SMG | NM_002390    | ADAM11 | chr17 | 42854849  | 42854969  |
| SMG | NM_002390    | ADAM11 | chr17 | 42855062  | 42855231  |
| SMG | NM_002390    | ADAM11 | chr17 | 42855319  | 42855434  |
| SMG | NM_002390    | ADAM11 | chr17 | 42855519  | 42855610  |
| SMG | NM_002390    | ADAM11 | chr17 | 42856589  | 42856607  |
| SMG | NM_002390    | ADAM11 | chr17 | 42857106  | 42859214  |
| LIT | NM_001130703 | ADAM29 | chr4  | 175839508 | 175839622 |
| LIT | NM_001130703 | ADAM29 | chr4  | 175841837 | 175841943 |

|     |              |          |       |           |           |
|-----|--------------|----------|-------|-----------|-----------|
| LIT | NM_001130703 | ADAM29   | chr4  | 175852136 | 175852325 |
| LIT | NM_001130703 | ADAM29   | chr4  | 175896496 | 175899331 |
| CNV | NM_030955    | ADAMTS12 | chr5  | 33527286  | 33527471  |
| CNV | NM_030955    | ADAMTS12 | chr5  | 33534937  | 33535097  |
| CNV | NM_030955    | ADAMTS12 | chr5  | 33546163  | 33546307  |
| CNV | NM_030955    | ADAMTS12 | chr5  | 33549311  | 33549488  |
| CNV | NM_030955    | ADAMTS12 | chr5  | 33561131  | 33561284  |
| CNV | NM_030955    | ADAMTS12 | chr5  | 33576158  | 33577265  |
| CNV | NM_030955    | ADAMTS12 | chr5  | 33588703  | 33588914  |
| CNV | NM_030955    | ADAMTS12 | chr5  | 33596038  | 33596165  |
| CNV | NM_030955    | ADAMTS12 | chr5  | 33614342  | 33614481  |
| CNV | NM_030955    | ADAMTS12 | chr5  | 33615932  | 33616177  |
| CNV | NM_030955    | ADAMTS12 | chr5  | 33624335  | 33624456  |
| CNV | NM_030955    | ADAMTS12 | chr5  | 33630884  | 33631018  |
| CNV | NM_030955    | ADAMTS12 | chr5  | 33637681  | 33637851  |
| CNV | NM_030955    | ADAMTS12 | chr5  | 33641914  | 33642060  |
| CNV | NM_030955    | ADAMTS12 | chr5  | 33643482  | 33643575  |
| CNV | NM_030955    | ADAMTS12 | chr5  | 33648926  | 33649071  |
| CNV | NM_030955    | ADAMTS12 | chr5  | 33649658  | 33649802  |
| CNV | NM_030955    | ADAMTS12 | chr5  | 33658288  | 33658438  |
| CNV | NM_030955    | ADAMTS12 | chr5  | 33662020  | 33662145  |
| CNV | NM_030955    | ADAMTS12 | chr5  | 33683122  | 33683206  |
| CNV | NM_030955    | ADAMTS12 | chr5  | 33683963  | 33684160  |
| CNV | NM_030955    | ADAMTS12 | chr5  | 33751508  | 33751653  |
| CNV | NM_030955    | ADAMTS12 | chr5  | 33881223  | 33881585  |
| CNV | NM_030955    | ADAMTS12 | chr5  | 33891834  | 33892124  |
| LIT | NM_139055    | ADAMTS15 | chr11 | 130318868 | 130319825 |
| LIT | NM_139055    | ADAMTS15 | chr11 | 130331383 | 130331516 |
| LIT | NM_139055    | ADAMTS15 | chr11 | 130331981 | 130332149 |
| LIT | NM_139055    | ADAMTS15 | chr11 | 130332391 | 130332675 |
| LIT | NM_139055    | ADAMTS15 | chr11 | 130339156 | 130339334 |
| LIT | NM_139055    | ADAMTS15 | chr11 | 130340814 | 130340996 |
| LIT | NM_139055    | ADAMTS15 | chr11 | 130341102 | 130341278 |
| LIT | NM_139055    | ADAMTS15 | chr11 | 130342941 | 130346539 |
| LIT | NM_199355    | ADAMTS18 | chr16 | 77316024  | 77317968  |
| LIT | NM_199355    | ADAMTS18 | chr16 | 77323160  | 77323308  |
| LIT | NM_199355    | ADAMTS18 | chr16 | 77325162  | 77325375  |
| LIT | NM_199355    | ADAMTS18 | chr16 | 77326972  | 77327155  |
| LIT | NM_199355    | ADAMTS18 | chr16 | 77328819  | 77329024  |
| LIT | NM_199355    | ADAMTS18 | chr16 | 77331185  | 77331312  |
| LIT | NM_199355    | ADAMTS18 | chr16 | 77334159  | 77334301  |
| LIT | NM_199355    | ADAMTS18 | chr16 | 77353745  | 77353990  |
| LIT | NM_199355    | ADAMTS18 | chr16 | 77354975  | 77355099  |

|     |           |          |       |          |          |
|-----|-----------|----------|-------|----------|----------|
| LIT | NM_199355 | ADAMTS18 | chr16 | 77356232 | 77356363 |
| LIT | NM_199355 | ADAMTS18 | chr16 | 77359762 | 77359935 |
| LIT | NM_199355 | ADAMTS18 | chr16 | 77369652 | 77369801 |
| LIT | NM_199355 | ADAMTS18 | chr16 | 77375600 | 77375696 |
| LIT | NM_199355 | ADAMTS18 | chr16 | 77387629 | 77387783 |
| LIT | NM_199355 | ADAMTS18 | chr16 | 77389836 | 77389974 |
| LIT | NM_199355 | ADAMTS18 | chr16 | 77393214 | 77393320 |
| LIT | NM_199355 | ADAMTS18 | chr16 | 77396001 | 77396161 |
| LIT | NM_199355 | ADAMTS18 | chr16 | 77397698 | 77397782 |
| LIT | NM_199355 | ADAMTS18 | chr16 | 77398084 | 77398278 |
| LIT | NM_199355 | ADAMTS18 | chr16 | 77401337 | 77401620 |
| LIT | NM_199355 | ADAMTS18 | chr16 | 77465191 | 77465508 |
| LIT | NM_199355 | ADAMTS18 | chr16 | 77468314 | 77468402 |
| LIT | NM_199355 | ADAMTS18 | chr16 | 77468502 | 77469011 |
| LIT | NM_207517 | ADAMTSL3 | chr15 | 84322837 | 84323028 |
| LIT | NM_207517 | ADAMTSL3 | chr15 | 84324480 | 84324582 |
| LIT | NM_207517 | ADAMTSL3 | chr15 | 84373140 | 84373260 |
| LIT | NM_207517 | ADAMTSL3 | chr15 | 84442274 | 84442402 |
| LIT | NM_207517 | ADAMTSL3 | chr15 | 84473401 | 84473447 |
| LIT | NM_207517 | ADAMTSL3 | chr15 | 84488562 | 84488799 |
| LIT | NM_207517 | ADAMTSL3 | chr15 | 84506840 | 84506967 |
| LIT | NM_207517 | ADAMTSL3 | chr15 | 84527517 | 84527592 |
| LIT | NM_207517 | ADAMTSL3 | chr15 | 84539553 | 84539711 |
| LIT | NM_207517 | ADAMTSL3 | chr15 | 84553852 | 84553964 |
| LIT | NM_207517 | ADAMTSL3 | chr15 | 84558860 | 84558999 |
| LIT | NM_207517 | ADAMTSL3 | chr15 | 84560080 | 84560131 |
| LIT | NM_207517 | ADAMTSL3 | chr15 | 84561435 | 84561640 |
| LIT | NM_207517 | ADAMTSL3 | chr15 | 84566609 | 84566757 |
| LIT | NM_207517 | ADAMTSL3 | chr15 | 84568398 | 84568483 |
| LIT | NM_207517 | ADAMTSL3 | chr15 | 84581843 | 84582130 |
| LIT | NM_207517 | ADAMTSL3 | chr15 | 84592655 | 84592785 |
| LIT | NM_207517 | ADAMTSL3 | chr15 | 84611347 | 84611540 |
| LIT | NM_207517 | ADAMTSL3 | chr15 | 84611654 | 84611834 |
| LIT | NM_207517 | ADAMTSL3 | chr15 | 84639235 | 84639389 |
| LIT | NM_207517 | ADAMTSL3 | chr15 | 84651024 | 84652096 |
| LIT | NM_207517 | ADAMTSL3 | chr15 | 84657442 | 84657570 |
| LIT | NM_207517 | ADAMTSL3 | chr15 | 84659837 | 84659966 |
| LIT | NM_207517 | ADAMTSL3 | chr15 | 84683293 | 84683476 |
| LIT | NM_207517 | ADAMTSL3 | chr15 | 84685134 | 84685251 |
| LIT | NM_207517 | ADAMTSL3 | chr15 | 84690161 | 84690345 |
| LIT | NM_207517 | ADAMTSL3 | chr15 | 84693989 | 84694188 |
| LIT | NM_207517 | ADAMTSL3 | chr15 | 84700086 | 84700184 |
| LIT | NM_207517 | ADAMTSL3 | chr15 | 84705524 | 84705739 |

|     |           |          |       |           |           |
|-----|-----------|----------|-------|-----------|-----------|
| LIT | NM_207517 | ADAMTSL3 | chr15 | 84706451  | 84708593  |
| SMG | NM_001126 | ADSS     | chr1  | 244571793 | 244572940 |
| SMG | NM_001126 | ADSS     | chr1  | 244574588 | 244574738 |
| SMG | NM_001126 | ADSS     | chr1  | 244579282 | 244579380 |
| SMG | NM_001126 | ADSS     | chr1  | 244580929 | 244581054 |
| SMG | NM_001126 | ADSS     | chr1  | 244582061 | 244582216 |
| SMG | NM_001126 | ADSS     | chr1  | 244583471 | 244583598 |
| SMG | NM_001126 | ADSS     | chr1  | 244586136 | 244586218 |
| SMG | NM_001126 | ADSS     | chr1  | 244587254 | 244587362 |
| SMG | NM_001126 | ADSS     | chr1  | 244587622 | 244587689 |
| SMG | NM_001126 | ADSS     | chr1  | 244595846 | 244595897 |
| SMG | NM_001126 | ADSS     | chr1  | 244600126 | 244600195 |
| SMG | NM_001126 | ADSS     | chr1  | 244600967 | 244601070 |
| SMG | NM_001126 | ADSS     | chr1  | 244614936 | 244615436 |
| SMG | NM_000686 | AGTR2    | chrX  | 115301957 | 115302069 |
| SMG | NM_000686 | AGTR2    | chrX  | 115302220 | 115302280 |
| SMG | NM_000686 | AGTR2    | chrX  | 115303498 | 115306225 |
| SMG | NM_001624 | AIM1     | chr6  | 106959729 | 106960914 |
| SMG | NM_001624 | AIM1     | chr6  | 106967005 | 106969328 |
| SMG | NM_001624 | AIM1     | chr6  | 106973007 | 106973055 |
| SMG | NM_001624 | AIM1     | chr6  | 106973142 | 106973261 |
| SMG | NM_001624 | AIM1     | chr6  | 106975179 | 106975345 |
| SMG | NM_001624 | AIM1     | chr6  | 106978050 | 106978190 |
| SMG | NM_001624 | AIM1     | chr6  | 106987277 | 106987404 |
| SMG | NM_001624 | AIM1     | chr6  | 106989460 | 106989496 |
| SMG | NM_001624 | AIM1     | chr6  | 106991314 | 106991472 |
| SMG | NM_001624 | AIM1     | chr6  | 106992445 | 106992572 |
| SMG | NM_001624 | AIM1     | chr6  | 106992662 | 106992808 |
| SMG | NM_001624 | AIM1     | chr6  | 106999726 | 106999853 |
| SMG | NM_001624 | AIM1     | chr6  | 107000058 | 107000091 |
| SMG | NM_001624 | AIM1     | chr6  | 107001329 | 107001442 |
| SMG | NM_001624 | AIM1     | chr6  | 107003642 | 107003772 |
| SMG | NM_001624 | AIM1     | chr6  | 107006360 | 107006500 |
| SMG | NM_001624 | AIM1     | chr6  | 107008677 | 107008801 |
| SMG | NM_001624 | AIM1     | chr6  | 107009216 | 107009375 |
| SMG | NM_001624 | AIM1     | chr6  | 107011638 | 107011801 |
| SMG | NM_001624 | AIM1     | chr6  | 107016346 | 107018334 |
| LIT | NM_004833 | AIM2     | chr1  | 159032274 | 159032508 |
| LIT | NM_004833 | AIM2     | chr1  | 159033275 | 159033464 |
| LIT | NM_004833 | AIM2     | chr1  | 159035699 | 159036119 |
| LIT | NM_004833 | AIM2     | chr1  | 159038357 | 159038491 |
| LIT | NM_004833 | AIM2     | chr1  | 159043027 | 159043309 |
| LIT | NM_004833 | AIM2     | chr1  | 159046422 | 159046647 |

|     |              |                    |       |          |          |
|-----|--------------|--------------------|-------|----------|----------|
| CNV | CDNA         | AK057471/LINC00355 | chr13 | 64560504 | 64561172 |
| CNV | CDNA         | AK057471/LINC00355 | chr13 | 64564229 | 64564333 |
| CNV | CDNA         | AK057471/LINC00355 | chr13 | 64576518 | 64576542 |
| CNV | CDNA         | AK057471/LINC00355 | chr13 | 64577481 | 64577598 |
| CNV | CDNA         | AK057471/LINC00355 | chr13 | 64608480 | 64608670 |
| CNV | CDNA         | AK057471/LINC00355 | chr13 | 64649375 | 64650144 |
| SMG | NM_001354    | AKR1C2             | chr10 | 5029967  | 5032230  |
| SMG | NM_001354    | AKR1C2             | chr10 | 5034022  | 5034105  |
| SMG | NM_001354    | AKR1C2             | chr10 | 5037510  | 5037676  |
| SMG | NM_001354    | AKR1C2             | chr10 | 5037947  | 5038057  |
| SMG | NM_001354    | AKR1C2             | chr10 | 5040816  | 5040939  |
| SMG | NM_001354    | AKR1C2             | chr10 | 5041391  | 5041469  |
| SMG | NM_001354    | AKR1C2             | chr10 | 5042741  | 5042858  |
| SMG | NM_001354    | AKR1C2             | chr10 | 5043705  | 5043873  |
| SMG | NM_001354    | AKR1C2             | chr10 | 5045943  | 5046206  |
| SMG | NM_001354    | AKR1C2             | chr10 | 5049598  | 5049698  |
| SMG | NM_001354    | AKR1C2             | chr10 | 5060091  | 5060225  |
| SMG | NM_001278160 | AKT1S1             | chr19 | 50372289 | 50373317 |
| SMG | NM_001278160 | AKT1S1             | chr19 | 50374803 | 50374973 |
| SMG | NM_001278160 | AKT1S1             | chr19 | 50375068 | 50375146 |
| SMG | NM_001278160 | AKT1S1             | chr19 | 50376173 | 50376559 |
| SMG | NM_001278160 | AKT1S1             | chr19 | 50381426 | 50381613 |
| DRV | NM_004304    | ALK                | chr2  | 29415639 | 29416788 |
| DRV | NM_004304    | ALK                | chr2  | 29419635 | 29419726 |
| DRV | NM_004304    | ALK                | chr2  | 29420407 | 29420542 |
| DRV | NM_004304    | ALK                | chr2  | 29430036 | 29430138 |
| DRV | NM_004304    | ALK                | chr2  | 29432651 | 29432744 |
| DRV | NM_004304    | ALK                | chr2  | 29436849 | 29436947 |
| DRV | NM_004304    | ALK                | chr2  | 29443571 | 29443701 |
| DRV | NM_004304    | ALK                | chr2  | 29445209 | 29445274 |
| DRV | NM_004304    | ALK                | chr2  | 29445382 | 29445473 |
| DRV | NM_004304    | ALK                | chr2  | 29446207 | 29446394 |
| DRV | NM_004304    | ALK                | chr2  | 29448326 | 29448431 |
| DRV | NM_004304    | ALK                | chr2  | 29449787 | 29449940 |
| DRV | NM_004304    | ALK                | chr2  | 29450439 | 29450538 |
| DRV | NM_004304    | ALK                | chr2  | 29451749 | 29451932 |
| DRV | NM_004304    | ALK                | chr2  | 29455169 | 29455314 |
| DRV | NM_004304    | ALK                | chr2  | 29456430 | 29456562 |
| DRV | NM_004304    | ALK                | chr2  | 29462545 | 29462696 |
| DRV | NM_004304    | ALK                | chr2  | 29473970 | 29474133 |
| DRV | NM_004304    | ALK                | chr2  | 29497964 | 29498093 |
| DRV | NM_004304    | ALK                | chr2  | 29498267 | 29498362 |
| DRV | NM_004304    | ALK                | chr2  | 29519753 | 29519923 |



|     |              |       |      |           |           |
|-----|--------------|-------|------|-----------|-----------|
| DRV | NM_004304    | ALK   | chr2 | 29541169  | 29541270  |
| DRV | NM_004304    | ALK   | chr2 | 29543616  | 29543748  |
| DRV | NM_004304    | ALK   | chr2 | 29551215  | 29551347  |
| DRV | NM_004304    | ALK   | chr2 | 29606597  | 29606725  |
| DRV | NM_004304    | ALK   | chr2 | 29754780  | 29754982  |
| DRV | NM_004304    | ALK   | chr2 | 29917715  | 29917880  |
| DRV | NM_004304    | ALK   | chr2 | 29940443  | 29940563  |
| DRV | NM_004304    | ALK   | chr2 | 30142858  | 30144477  |
| DRV | NM_152424    | AMER1 | chrX | 63404996  | 63413264  |
| DRV | NM_152424    | AMER1 | chrX | 63425449  | 63425624  |
| SMG | NM_133265    | AMOT  | chrX | 112018104 | 112021892 |
| SMG | NM_133265    | AMOT  | chrX | 112022224 | 112022908 |
| SMG | NM_133265    | AMOT  | chrX | 112024113 | 112024346 |
| SMG | NM_133265    | AMOT  | chrX | 112025767 | 112025890 |
| SMG | NM_133265    | AMOT  | chrX | 112033819 | 112034010 |
| SMG | NM_133265    | AMOT  | chrX | 112035059 | 112035209 |
| SMG | NM_133265    | AMOT  | chrX | 112048174 | 112048320 |
| SMG | NM_133265    | AMOT  | chrX | 112053121 | 112053214 |
| SMG | NM_133265    | AMOT  | chrX | 112054476 | 112054621 |
| SMG | NM_133265    | AMOT  | chrX | 112058585 | 112059105 |
| SMG | NM_133265    | AMOT  | chrX | 112075521 | 112075598 |
| SMG | NM_133265    | AMOT  | chrX | 112083679 | 112084043 |
| SMG | NM_000699    | AMY2A | chr1 | 104159998 | 104160230 |
| SMG | NM_000699    | AMY2A | chr1 | 104160575 | 104160722 |
| SMG | NM_000699    | AMY2A | chr1 | 104161532 | 104161730 |
| SMG | NM_000699    | AMY2A | chr1 | 104162175 | 104162406 |
| SMG | NM_000699    | AMY2A | chr1 | 104163172 | 104163306 |
| SMG | NM_000699    | AMY2A | chr1 | 104164198 | 104164321 |
| SMG | NM_000699    | AMY2A | chr1 | 104164415 | 104164515 |
| SMG | NM_000699    | AMY2A | chr1 | 104166487 | 104166606 |
| SMG | NM_000699    | AMY2A | chr1 | 104166717 | 104166843 |
| SMG | NM_000699    | AMY2A | chr1 | 104168178 | 104168400 |
| CNV | NM_001142446 | ANK1  | chr8 | 41510743  | 41513272  |
| CNV | NM_001142446 | ANK1  | chr8 | 41519393  | 41519459  |
| CNV | NM_001142446 | ANK1  | chr8 | 41521176  | 41521260  |
| CNV | NM_001142446 | ANK1  | chr8 | 41525784  | 41526082  |
| CNV | NM_001142446 | ANK1  | chr8 | 41529871  | 41530430  |
| CNV | NM_001142446 | ANK1  | chr8 | 41542061  | 41542208  |
| CNV | NM_001142446 | ANK1  | chr8 | 41543669  | 41543801  |
| CNV | NM_001142446 | ANK1  | chr8 | 41545673  | 41545748  |
| CNV | NM_001142446 | ANK1  | chr8 | 41546028  | 41546107  |
| CNV | NM_001142446 | ANK1  | chr8 | 41547744  | 41547864  |
| CNV | NM_001142446 | ANK1  | chr8 | 41547991  | 41548117  |

|     |              |        |      |          |          |
|-----|--------------|--------|------|----------|----------|
| CNV | NM_001142446 | ANK1   | chr8 | 41550165 | 41550394 |
| CNV | NM_001142446 | ANK1   | chr8 | 41550622 | 41550719 |
| CNV | NM_001142446 | ANK1   | chr8 | 41551415 | 41551620 |
| CNV | NM_001142446 | ANK1   | chr8 | 41552109 | 41552321 |
| CNV | NM_001142446 | ANK1   | chr8 | 41552694 | 41552849 |
| CNV | NM_001142446 | ANK1   | chr8 | 41553880 | 41554105 |
| CNV | NM_001142446 | ANK1   | chr8 | 41554193 | 41554291 |
| CNV | NM_001142446 | ANK1   | chr8 | 41555560 | 41555639 |
| CNV | NM_001142446 | ANK1   | chr8 | 41556969 | 41557066 |
| CNV | NM_001142446 | ANK1   | chr8 | 41557948 | 41557972 |
| CNV | NM_001142446 | ANK1   | chr8 | 41559067 | 41559140 |
| CNV | NM_001142446 | ANK1   | chr8 | 41559569 | 41559662 |
| CNV | NM_001142446 | ANK1   | chr8 | 41561558 | 41561657 |
| CNV | NM_001142446 | ANK1   | chr8 | 41561891 | 41561990 |
| CNV | NM_001142446 | ANK1   | chr8 | 41563660 | 41563759 |
| CNV | NM_001142446 | ANK1   | chr8 | 41566295 | 41566493 |
| CNV | NM_001142446 | ANK1   | chr8 | 41571673 | 41571772 |
| CNV | NM_001142446 | ANK1   | chr8 | 41572493 | 41572592 |
| CNV | NM_001142446 | ANK1   | chr8 | 41573169 | 41573367 |
| CNV | NM_001142446 | ANK1   | chr8 | 41574470 | 41574569 |
| CNV | NM_001142446 | ANK1   | chr8 | 41575121 | 41575220 |
| CNV | NM_001142446 | ANK1   | chr8 | 41575623 | 41575722 |
| CNV | NM_001142446 | ANK1   | chr8 | 41577178 | 41577376 |
| CNV | NM_001142446 | ANK1   | chr8 | 41580642 | 41580741 |
| CNV | NM_001142446 | ANK1   | chr8 | 41581052 | 41581151 |
| CNV | NM_001142446 | ANK1   | chr8 | 41581973 | 41582072 |
| CNV | NM_001142446 | ANK1   | chr8 | 41583278 | 41583464 |
| CNV | NM_001142446 | ANK1   | chr8 | 41584767 | 41584866 |
| CNV | NM_001142446 | ANK1   | chr8 | 41585425 | 41585524 |
| CNV | NM_001142446 | ANK1   | chr8 | 41591488 | 41591587 |
| CNV | NM_001142446 | ANK1   | chr8 | 41615553 | 41615655 |
| CNV | NM_001142446 | ANK1   | chr8 | 41753872 | 41754280 |
| SMG | NM_019004    | ANKIB1 | chr7 | 91875547 | 91875833 |
| SMG | NM_019004    | ANKIB1 | chr7 | 91924202 | 91924480 |
| SMG | NM_019004    | ANKIB1 | chr7 | 91936672 | 91936970 |
| SMG | NM_019004    | ANKIB1 | chr7 | 91948643 | 91948826 |
| SMG | NM_019004    | ANKIB1 | chr7 | 91957096 | 91957214 |
| SMG | NM_019004    | ANKIB1 | chr7 | 91972337 | 91972546 |
| SMG | NM_019004    | ANKIB1 | chr7 | 91974291 | 91974380 |
| SMG | NM_019004    | ANKIB1 | chr7 | 91980263 | 91980408 |
| SMG | NM_019004    | ANKIB1 | chr7 | 91981789 | 91981956 |
| SMG | NM_019004    | ANKIB1 | chr7 | 91991498 | 91991587 |
| SMG | NM_019004    | ANKIB1 | chr7 | 92000790 | 92000921 |

|     |              |         |       |          |          |
|-----|--------------|---------|-------|----------|----------|
| SMG | NM_019004    | ANKIB1  | chr7  | 92015822 | 92015957 |
| SMG | NM_019004    | ANKIB1  | chr7  | 92017111 | 92017198 |
| SMG | NM_019004    | ANKIB1  | chr7  | 92017288 | 92017355 |
| SMG | NM_019004    | ANKIB1  | chr7  | 92019284 | 92019430 |
| SMG | NM_019004    | ANKIB1  | chr7  | 92020479 | 92020658 |
| SMG | NM_019004    | ANKIB1  | chr7  | 92021554 | 92021606 |
| SMG | NM_019004    | ANKIB1  | chr7  | 92025678 | 92025790 |
| SMG | NM_019004    | ANKIB1  | chr7  | 92027036 | 92027173 |
| SMG | NM_019004    | ANKIB1  | chr7  | 92027525 | 92030698 |
| SMG | NM_001256053 | ANKRD26 | chr10 | 27293044 | 27294652 |
| SMG | NM_001256053 | ANKRD26 | chr10 | 27295845 | 27295891 |
| SMG | NM_001256053 | ANKRD26 | chr10 | 27301810 | 27302039 |
| SMG | NM_001256053 | ANKRD26 | chr10 | 27303422 | 27303640 |
| SMG | NM_001256053 | ANKRD26 | chr10 | 27306430 | 27306721 |
| SMG | NM_001256053 | ANKRD26 | chr10 | 27311486 | 27311616 |
| SMG | NM_001256053 | ANKRD26 | chr10 | 27313375 | 27313488 |
| SMG | NM_001256053 | ANKRD26 | chr10 | 27317780 | 27317874 |
| SMG | NM_001256053 | ANKRD26 | chr10 | 27318214 | 27318285 |
| SMG | NM_001256053 | ANKRD26 | chr10 | 27322153 | 27322306 |
| SMG | NM_001256053 | ANKRD26 | chr10 | 27323724 | 27324681 |
| SMG | NM_001256053 | ANKRD26 | chr10 | 27326114 | 27326252 |
| SMG | NM_001256053 | ANKRD26 | chr10 | 27326799 | 27326983 |
| SMG | NM_001256053 | ANKRD26 | chr10 | 27328893 | 27329107 |
| SMG | NM_001256053 | ANKRD26 | chr10 | 27332354 | 27332496 |
| SMG | NM_001256053 | ANKRD26 | chr10 | 27333085 | 27333119 |
| SMG | NM_001256053 | ANKRD26 | chr10 | 27335281 | 27335449 |
| SMG | NM_001256053 | ANKRD26 | chr10 | 27337729 | 27337908 |
| SMG | NM_001256053 | ANKRD26 | chr10 | 27342248 | 27342319 |
| SMG | NM_001256053 | ANKRD26 | chr10 | 27349273 | 27349346 |
| SMG | NM_001256053 | ANKRD26 | chr10 | 27349440 | 27349469 |
| SMG | NM_001256053 | ANKRD26 | chr10 | 27350072 | 27350171 |
| SMG | NM_001256053 | ANKRD26 | chr10 | 27352916 | 27353010 |
| SMG | NM_001256053 | ANKRD26 | chr10 | 27355415 | 27355477 |
| SMG | NM_001256053 | ANKRD26 | chr10 | 27356085 | 27356215 |
| SMG | NM_001256053 | ANKRD26 | chr10 | 27366266 | 27366469 |
| SMG | NM_001256053 | ANKRD26 | chr10 | 27366561 | 27366622 |
| SMG | NM_001256053 | ANKRD26 | chr10 | 27368017 | 27368090 |
| SMG | NM_001256053 | ANKRD26 | chr10 | 27371731 | 27371762 |
| SMG | NM_001256053 | ANKRD26 | chr10 | 27375467 | 27375538 |
| SMG | NM_001256053 | ANKRD26 | chr10 | 27381334 | 27381441 |
| SMG | NM_001256053 | ANKRD26 | chr10 | 27382277 | 27382451 |
| SMG | NM_001256053 | ANKRD26 | chr10 | 27382613 | 27382728 |
| SMG | NM_001256053 | ANKRD26 | chr10 | 27389013 | 27389427 |

|     |              |       |       |           |           |
|-----|--------------|-------|-------|-----------|-----------|
| LIT | NM_001160    | APAF1 | chr12 | 99039077  | 99039613  |
| LIT | NM_001160    | APAF1 | chr12 | 99042096  | 99042275  |
| LIT | NM_001160    | APAF1 | chr12 | 99042403  | 99042560  |
| LIT | NM_001160    | APAF1 | chr12 | 99043264  | 99043462  |
| LIT | NM_001160    | APAF1 | chr12 | 99052937  | 99053121  |
| LIT | NM_001160    | APAF1 | chr12 | 99056233  | 99056346  |
| LIT | NM_001160    | APAF1 | chr12 | 99056452  | 99056584  |
| LIT | NM_001160    | APAF1 | chr12 | 99059330  | 99059569  |
| LIT | NM_001160    | APAF1 | chr12 | 99059967  | 99060135  |
| LIT | NM_001160    | APAF1 | chr12 | 99061290  | 99061422  |
| LIT | NM_001160    | APAF1 | chr12 | 99064750  | 99064864  |
| LIT | NM_001160    | APAF1 | chr12 | 99065312  | 99065497  |
| LIT | NM_001160    | APAF1 | chr12 | 99071202  | 99071329  |
| LIT | NM_001160    | APAF1 | chr12 | 99074054  | 99074180  |
| LIT | NM_001160    | APAF1 | chr12 | 99076920  | 99077052  |
| LIT | NM_001160    | APAF1 | chr12 | 99080525  | 99080651  |
| LIT | NM_001160    | APAF1 | chr12 | 99093185  | 99093347  |
| LIT | NM_001160    | APAF1 | chr12 | 99100262  | 99100388  |
| LIT | NM_001160    | APAF1 | chr12 | 99102362  | 99102482  |
| LIT | NM_001160    | APAF1 | chr12 | 99106096  | 99106213  |
| LIT | NM_001160    | APAF1 | chr12 | 99109204  | 99109330  |
| LIT | NM_001160    | APAF1 | chr12 | 99116970  | 99117090  |
| LIT | NM_001160    | APAF1 | chr12 | 99117416  | 99117542  |
| LIT | NM_001160    | APAF1 | chr12 | 99119192  | 99119318  |
| LIT | NM_001160    | APAF1 | chr12 | 99120950  | 99121094  |
| LIT | NM_001160    | APAF1 | chr12 | 99126197  | 99129211  |
| DRV | NM_001127511 | APC   | chr5  | 112043201 | 112043579 |
| DRV | NM_001127511 | APC   | chr5  | 112102022 | 112102107 |
| DRV | NM_001127511 | APC   | chr5  | 112102885 | 112103087 |
| DRV | NM_001127511 | APC   | chr5  | 112111325 | 112111434 |
| DRV | NM_001127511 | APC   | chr5  | 112116486 | 112116600 |
| DRV | NM_001127511 | APC   | chr5  | 112136975 | 112137080 |
| DRV | NM_001127511 | APC   | chr5  | 112151191 | 112151290 |
| DRV | NM_001127511 | APC   | chr5  | 112154662 | 112155041 |
| DRV | NM_001127511 | APC   | chr5  | 112157592 | 112157688 |
| DRV | NM_001127511 | APC   | chr5  | 112162804 | 112162944 |
| DRV | NM_001127511 | APC   | chr5  | 112163625 | 112163703 |
| DRV | NM_001127511 | APC   | chr5  | 112164552 | 112164669 |
| DRV | NM_001127511 | APC   | chr5  | 112170647 | 112170862 |
| DRV | NM_001127511 | APC   | chr5  | 112173249 | 112181936 |
| CNV | NM_005883    | APC2  | chr19 | 1450147   | 1450337   |
| CNV | NM_005883    | APC2  | chr19 | 1452982   | 1453141   |
| CNV | NM_005883    | APC2  | chr19 | 1453245   | 1453336   |

|     |           |          |       |           |           |
|-----|-----------|----------|-------|-----------|-----------|
| CNV | NM_005883 | APC2     | chr19 | 1453429   | 1453610   |
| CNV | NM_005883 | APC2     | chr19 | 1455147   | 1455256   |
| CNV | NM_005883 | APC2     | chr19 | 1455382   | 1455499   |
| CNV | NM_005883 | APC2     | chr19 | 1456074   | 1456152   |
| CNV | NM_005883 | APC2     | chr19 | 1456304   | 1456403   |
| CNV | NM_005883 | APC2     | chr19 | 1456851   | 1457242   |
| CNV | NM_005883 | APC2     | chr19 | 1457963   | 1458059   |
| CNV | NM_005883 | APC2     | chr19 | 1460179   | 1460319   |
| CNV | NM_005883 | APC2     | chr19 | 1460778   | 1460856   |
| CNV | NM_005883 | APC2     | chr19 | 1461035   | 1461152   |
| CNV | NM_005883 | APC2     | chr19 | 1461961   | 1462176   |
| CNV | NM_005883 | APC2     | chr19 | 1465153   | 1473243   |
| DRV | NM_000044 | AR       | chrX  | 66763873  | 66766604  |
| DRV | NM_000044 | AR       | chrX  | 66863097  | 66863249  |
| DRV | NM_000044 | AR       | chrX  | 66905851  | 66905968  |
| DRV | NM_000044 | AR       | chrX  | 66931243  | 66931531  |
| DRV | NM_000044 | AR       | chrX  | 66937319  | 66937464  |
| DRV | NM_000044 | AR       | chrX  | 66941674  | 66941805  |
| DRV | NM_000044 | AR       | chrX  | 66942668  | 66942826  |
| DRV | NM_000044 | AR       | chrX  | 66943527  | 66950461  |
| SMG | NM_001172 | ARG2     | chr14 | 68086578  | 68086805  |
| SMG | NM_001172 | ARG2     | chr14 | 68087610  | 68087683  |
| SMG | NM_001172 | ARG2     | chr14 | 68108902  | 68109080  |
| SMG | NM_001172 | ARG2     | chr14 | 68112359  | 68112519  |
| SMG | NM_001172 | ARG2     | chr14 | 68113360  | 68113455  |
| SMG | NM_001172 | ARG2     | chr14 | 68113637  | 68113742  |
| SMG | NM_001172 | ARG2     | chr14 | 68114763  | 68114900  |
| SMG | NM_001172 | ARG2     | chr14 | 68117431  | 68118436  |
| SMG | NM_033515 | ARHGAP18 | chr6  | 129898239 | 129899749 |
| SMG | NM_033515 | ARHGAP18 | chr6  | 129901214 | 129901276 |
| SMG | NM_033515 | ARHGAP18 | chr6  | 129905132 | 129905257 |
| SMG | NM_033515 | ARHGAP18 | chr6  | 129920360 | 129920501 |
| SMG | NM_033515 | ARHGAP18 | chr6  | 129921786 | 129921993 |
| SMG | NM_033515 | ARHGAP18 | chr6  | 129927021 | 129927104 |
| SMG | NM_033515 | ARHGAP18 | chr6  | 129929037 | 129929197 |
| SMG | NM_033515 | ARHGAP18 | chr6  | 129932677 | 129932755 |
| SMG | NM_033515 | ARHGAP18 | chr6  | 129937356 | 129937448 |
| SMG | NM_033515 | ARHGAP18 | chr6  | 129939831 | 129939997 |
| SMG | NM_033515 | ARHGAP18 | chr6  | 129950497 | 129950667 |
| SMG | NM_033515 | ARHGAP18 | chr6  | 129955186 | 129955250 |
| SMG | NM_033515 | ARHGAP18 | chr6  | 129959538 | 129959774 |
| SMG | NM_033515 | ARHGAP18 | chr6  | 129962960 | 129963163 |
| SMG | NM_033515 | ARHGAP18 | chr6  | 130031168 | 130031370 |

|     |              |          |       |         |         |
|-----|--------------|----------|-------|---------|---------|
| SMG | NM_001010000 | ARHGAP28 | chr18 | 6834431 | 6834538 |
| SMG | NM_001010000 | ARHGAP28 | chr18 | 6837195 | 6837413 |
| SMG | NM_001010000 | ARHGAP28 | chr18 | 6851032 | 6851125 |
| SMG | NM_001010000 | ARHGAP28 | chr18 | 6859806 | 6859896 |
| SMG | NM_001010000 | ARHGAP28 | chr18 | 6868148 | 6868233 |
| SMG | NM_001010000 | ARHGAP28 | chr18 | 6870588 | 6870731 |
| SMG | NM_001010000 | ARHGAP28 | chr18 | 6873407 | 6873573 |
| SMG | NM_001010000 | ARHGAP28 | chr18 | 6873682 | 6873774 |
| SMG | NM_001010000 | ARHGAP28 | chr18 | 6876129 | 6876207 |
| SMG | NM_001010000 | ARHGAP28 | chr18 | 6882135 | 6882298 |
| SMG | NM_001010000 | ARHGAP28 | chr18 | 6887155 | 6887238 |
| SMG | NM_001010000 | ARHGAP28 | chr18 | 6889886 | 6890084 |
| SMG | NM_001010000 | ARHGAP28 | chr18 | 6890428 | 6890542 |
| SMG | NM_001010000 | ARHGAP28 | chr18 | 6894833 | 6894890 |
| SMG | NM_001010000 | ARHGAP28 | chr18 | 6896500 | 6896625 |
| SMG | NM_001010000 | ARHGAP28 | chr18 | 6908958 | 6909023 |
| SMG | NM_001010000 | ARHGAP28 | chr18 | 6912058 | 6915712 |
| CNV | NM_014629    | ARHGEF10 | chr8  | 1772148 | 1772279 |
| CNV | NM_014629    | ARHGEF10 | chr8  | 1791518 | 1791602 |
| CNV | NM_014629    | ARHGEF10 | chr8  | 1806125 | 1806281 |
| CNV | NM_014629    | ARHGEF10 | chr8  | 1808062 | 1808350 |
| CNV | NM_014629    | ARHGEF10 | chr8  | 1812538 | 1812602 |
| CNV | NM_014629    | ARHGEF10 | chr8  | 1814691 | 1814768 |
| CNV | NM_014629    | ARHGEF10 | chr8  | 1817359 | 1817416 |
| CNV | NM_014629    | ARHGEF10 | chr8  | 1824736 | 1824900 |
| CNV | NM_014629    | ARHGEF10 | chr8  | 1828213 | 1828330 |
| CNV | NM_014629    | ARHGEF10 | chr8  | 1830800 | 1830915 |
| CNV | NM_014629    | ARHGEF10 | chr8  | 1833766 | 1833873 |
| CNV | NM_014629    | ARHGEF10 | chr8  | 1841734 | 1841812 |
| CNV | NM_014629    | ARHGEF10 | chr8  | 1842558 | 1842738 |
| CNV | NM_014629    | ARHGEF10 | chr8  | 1844498 | 1844615 |
| CNV | NM_014629    | ARHGEF10 | chr8  | 1846598 | 1846691 |
| CNV | NM_014629    | ARHGEF10 | chr8  | 1851446 | 1851617 |
| CNV | NM_014629    | ARHGEF10 | chr8  | 1853736 | 1853882 |
| CNV | NM_014629    | ARHGEF10 | chr8  | 1857460 | 1857636 |
| CNV | NM_014629    | ARHGEF10 | chr8  | 1871129 | 1871245 |
| CNV | NM_014629    | ARHGEF10 | chr8  | 1871633 | 1871761 |
| CNV | NM_014629    | ARHGEF10 | chr8  | 1871939 | 1872040 |
| CNV | NM_014629    | ARHGEF10 | chr8  | 1873448 | 1873570 |
| CNV | NM_014629    | ARHGEF10 | chr8  | 1874542 | 1874629 |
| CNV | NM_014629    | ARHGEF10 | chr8  | 1876592 | 1876816 |
| CNV | NM_014629    | ARHGEF10 | chr8  | 1877451 | 1877609 |
| CNV | NM_014629    | ARHGEF10 | chr8  | 1881965 | 1882108 |

|     |              |          |       |           |           |
|-----|--------------|----------|-------|-----------|-----------|
| CNV | NM_014629    | ARHGEF10 | chr8  | 1893646   | 1893821   |
| CNV | NM_014629    | ARHGEF10 | chr8  | 1900870   | 1900993   |
| CNV | NM_014629    | ARHGEF10 | chr8  | 1904914   | 1906807   |
| SMG | NM_001198665 | ARHGEF12 | chr11 | 120207617 | 120207984 |
| SMG | NM_001198665 | ARHGEF12 | chr11 | 120276826 | 120276850 |
| SMG | NM_001198665 | ARHGEF12 | chr11 | 120278446 | 120278532 |
| SMG | NM_001198665 | ARHGEF12 | chr11 | 120291461 | 120291560 |
| SMG | NM_001198665 | ARHGEF12 | chr11 | 120292511 | 120292561 |
| SMG | NM_001198665 | ARHGEF12 | chr11 | 120295066 | 120295124 |
| SMG | NM_001198665 | ARHGEF12 | chr11 | 120298777 | 120298956 |
| SMG | NM_001198665 | ARHGEF12 | chr11 | 120300148 | 120300226 |
| SMG | NM_001198665 | ARHGEF12 | chr11 | 120300420 | 120300540 |
| SMG | NM_001198665 | ARHGEF12 | chr11 | 120302479 | 120302620 |
| SMG | NM_001198665 | ARHGEF12 | chr11 | 120308016 | 120308091 |
| SMG | NM_001198665 | ARHGEF12 | chr11 | 120310837 | 120310930 |
| SMG | NM_001198665 | ARHGEF12 | chr11 | 120312415 | 120312526 |
| SMG | NM_001198665 | ARHGEF12 | chr11 | 120312812 | 120312911 |
| SMG | NM_001198665 | ARHGEF12 | chr11 | 120316130 | 120316173 |
| SMG | NM_001198665 | ARHGEF12 | chr11 | 120317111 | 120317217 |
| SMG | NM_001198665 | ARHGEF12 | chr11 | 120317656 | 120317794 |
| SMG | NM_001198665 | ARHGEF12 | chr11 | 120318582 | 120318615 |
| SMG | NM_001198665 | ARHGEF12 | chr11 | 120318942 | 120319057 |
| SMG | NM_001198665 | ARHGEF12 | chr11 | 120319817 | 120319923 |
| SMG | NM_001198665 | ARHGEF12 | chr11 | 120322220 | 120322433 |
| SMG | NM_001198665 | ARHGEF12 | chr11 | 120327826 | 120327959 |
| SMG | NM_001198665 | ARHGEF12 | chr11 | 120328429 | 120328465 |
| SMG | NM_001198665 | ARHGEF12 | chr11 | 120328788 | 120328943 |
| SMG | NM_001198665 | ARHGEF12 | chr11 | 120329882 | 120330029 |
| SMG | NM_001198665 | ARHGEF12 | chr11 | 120331380 | 120331466 |
| SMG | NM_001198665 | ARHGEF12 | chr11 | 120335945 | 120336071 |
| SMG | NM_001198665 | ARHGEF12 | chr11 | 120337902 | 120338017 |
| SMG | NM_001198665 | ARHGEF12 | chr11 | 120339996 | 120340097 |
| SMG | NM_001198665 | ARHGEF12 | chr11 | 120343758 | 120343836 |
| SMG | NM_001198665 | ARHGEF12 | chr11 | 120345268 | 120345344 |
| SMG | NM_001198665 | ARHGEF12 | chr11 | 120346048 | 120346216 |
| SMG | NM_001198665 | ARHGEF12 | chr11 | 120347369 | 120347457 |
| SMG | NM_001198665 | ARHGEF12 | chr11 | 120347927 | 120348014 |
| SMG | NM_001198665 | ARHGEF12 | chr11 | 120348155 | 120348235 |
| SMG | NM_001198665 | ARHGEF12 | chr11 | 120348864 | 120349098 |
| SMG | NM_001198665 | ARHGEF12 | chr11 | 120350668 | 120351139 |
| SMG | NM_001198665 | ARHGEF12 | chr11 | 120351968 | 120352285 |
| SMG | NM_001198665 | ARHGEF12 | chr11 | 120355146 | 120355216 |
| SMG | NM_001198665 | ARHGEF12 | chr11 | 120355775 | 120360645 |

|     |           |          |       |           |           |
|-----|-----------|----------|-------|-----------|-----------|
| SMG | NM_015318 | ARHGEF18 | chr19 | 7459998   | 7460133   |
| SMG | NM_015318 | ARHGEF18 | chr19 | 7505229   | 7505368   |
| SMG | NM_015318 | ARHGEF18 | chr19 | 7506538   | 7506651   |
| SMG | NM_015318 | ARHGEF18 | chr19 | 7506797   | 7506938   |
| SMG | NM_015318 | ARHGEF18 | chr19 | 7509089   | 7509340   |
| SMG | NM_015318 | ARHGEF18 | chr19 | 7511928   | 7512054   |
| SMG | NM_015318 | ARHGEF18 | chr19 | 7516034   | 7516152   |
| SMG | NM_015318 | ARHGEF18 | chr19 | 7518352   | 7518601   |
| SMG | NM_015318 | ARHGEF18 | chr19 | 7521212   | 7521289   |
| SMG | NM_015318 | ARHGEF18 | chr19 | 7523397   | 7523576   |
| SMG | NM_015318 | ARHGEF18 | chr19 | 7524788   | 7524880   |
| SMG | NM_015318 | ARHGEF18 | chr19 | 7527037   | 7527220   |
| SMG | NM_015318 | ARHGEF18 | chr19 | 7528703   | 7528841   |
| SMG | NM_015318 | ARHGEF18 | chr19 | 7529445   | 7529576   |
| SMG | NM_015318 | ARHGEF18 | chr19 | 7531803   | 7531860   |
| SMG | NM_015318 | ARHGEF18 | chr19 | 7531956   | 7532004   |
| SMG | NM_015318 | ARHGEF18 | chr19 | 7532099   | 7532570   |
| SMG | NM_015318 | ARHGEF18 | chr19 | 7533710   | 7534017   |
| SMG | NM_015318 | ARHGEF18 | chr19 | 7534789   | 7534915   |
| SMG | NM_015318 | ARHGEF18 | chr19 | 7535011   | 7535201   |
| SMG | NM_015318 | ARHGEF18 | chr19 | 7535422   | 7537371   |
| SMG | NM_004840 | ARHGEF6  | chrX  | 135747711 | 135750328 |
| SMG | NM_004840 | ARHGEF6  | chrX  | 135751640 | 135751695 |
| SMG | NM_004840 | ARHGEF6  | chrX  | 135754178 | 135754278 |
| SMG | NM_004840 | ARHGEF6  | chrX  | 135757165 | 135757255 |
| SMG | NM_004840 | ARHGEF6  | chrX  | 135758782 | 135758876 |
| SMG | NM_004840 | ARHGEF6  | chrX  | 135760094 | 135760115 |
| SMG | NM_004840 | ARHGEF6  | chrX  | 135761693 | 135761819 |
| SMG | NM_004840 | ARHGEF6  | chrX  | 135762889 | 135763035 |
| SMG | NM_004840 | ARHGEF6  | chrX  | 135764048 | 135764127 |
| SMG | NM_004840 | ARHGEF6  | chrX  | 135764916 | 135765003 |
| SMG | NM_004840 | ARHGEF6  | chrX  | 135767835 | 135767982 |
| SMG | NM_004840 | ARHGEF6  | chrX  | 135770090 | 135770150 |
| SMG | NM_004840 | ARHGEF6  | chrX  | 135772768 | 135772907 |
| SMG | NM_004840 | ARHGEF6  | chrX  | 135789066 | 135789189 |
| SMG | NM_004840 | ARHGEF6  | chrX  | 135790833 | 135790929 |
| SMG | NM_004840 | ARHGEF6  | chrX  | 135795434 | 135795529 |
| SMG | NM_004840 | ARHGEF6  | chrX  | 135814260 | 135814331 |
| SMG | NM_004840 | ARHGEF6  | chrX  | 135825743 | 135825945 |
| SMG | NM_004840 | ARHGEF6  | chrX  | 135827381 | 135827506 |
| SMG | NM_004840 | ARHGEF6  | chrX  | 135829666 | 135829751 |
| SMG | NM_004840 | ARHGEF6  | chrX  | 135861572 | 135861656 |
| SMG | NM_004840 | ARHGEF6  | chrX  | 135862876 | 135863503 |



|     |           |        |       |          |          |
|-----|-----------|--------|-------|----------|----------|
| DRV | NM_006015 | ARID1A | chr1  | 27022521 | 27024031 |
| DRV | NM_006015 | ARID1A | chr1  | 27056141 | 27056354 |
| DRV | NM_006015 | ARID1A | chr1  | 27057642 | 27058095 |
| DRV | NM_006015 | ARID1A | chr1  | 27059166 | 27059283 |
| DRV | NM_006015 | ARID1A | chr1  | 27087346 | 27087587 |
| DRV | NM_006015 | ARID1A | chr1  | 27087874 | 27087964 |
| DRV | NM_006015 | ARID1A | chr1  | 27088642 | 27088810 |
| DRV | NM_006015 | ARID1A | chr1  | 27089463 | 27089776 |
| DRV | NM_006015 | ARID1A | chr1  | 27092711 | 27092857 |
| DRV | NM_006015 | ARID1A | chr1  | 27092947 | 27093057 |
| DRV | NM_006015 | ARID1A | chr1  | 27094280 | 27094490 |
| DRV | NM_006015 | ARID1A | chr1  | 27097609 | 27097817 |
| DRV | NM_006015 | ARID1A | chr1  | 27098990 | 27099123 |
| DRV | NM_006015 | ARID1A | chr1  | 27099302 | 27099478 |
| DRV | NM_006015 | ARID1A | chr1  | 27099836 | 27099987 |
| DRV | NM_006015 | ARID1A | chr1  | 27100070 | 27100208 |
| DRV | NM_006015 | ARID1A | chr1  | 27100292 | 27100389 |
| DRV | NM_006015 | ARID1A | chr1  | 27100819 | 27101711 |
| DRV | NM_006015 | ARID1A | chr1  | 27102067 | 27102198 |
| DRV | NM_006015 | ARID1A | chr1  | 27105513 | 27108601 |
| DRV | NM_152641 | ARID2  | chr12 | 46123619 | 46123711 |
| DRV | NM_152641 | ARID2  | chr12 | 46123826 | 46123920 |
| DRV | NM_152641 | ARID2  | chr12 | 46124999 | 46125097 |
| DRV | NM_152641 | ARID2  | chr12 | 46205200 | 46205334 |
| DRV | NM_152641 | ARID2  | chr12 | 46211452 | 46211671 |
| DRV | NM_152641 | ARID2  | chr12 | 46215202 | 46215270 |
| DRV | NM_152641 | ARID2  | chr12 | 46230371 | 46230438 |
| DRV | NM_152641 | ARID2  | chr12 | 46230523 | 46230774 |
| DRV | NM_152641 | ARID2  | chr12 | 46231103 | 46231200 |
| DRV | NM_152641 | ARID2  | chr12 | 46231280 | 46231490 |
| DRV | NM_152641 | ARID2  | chr12 | 46233111 | 46233279 |
| DRV | NM_152641 | ARID2  | chr12 | 46240638 | 46240720 |
| DRV | NM_152641 | ARID2  | chr12 | 46242618 | 46242753 |
| DRV | NM_152641 | ARID2  | chr12 | 46243362 | 46243559 |
| DRV | NM_152641 | ARID2  | chr12 | 46243818 | 46246679 |
| DRV | NM_152641 | ARID2  | chr12 | 46254583 | 46254732 |
| DRV | NM_152641 | ARID2  | chr12 | 46285562 | 46285701 |
| DRV | NM_152641 | ARID2  | chr12 | 46285793 | 46285879 |
| DRV | NM_152641 | ARID2  | chr12 | 46287202 | 46287326 |
| DRV | NM_152641 | ARID2  | chr12 | 46287412 | 46287504 |
| DRV | NM_152641 | ARID2  | chr12 | 46298716 | 46301819 |
| SMG | NM_012106 | ARL2BP | chr16 | 57279037 | 57279317 |
| SMG | NM_012106 | ARL2BP | chr16 | 57279991 | 57280053 |

|     |           |        |       |           |           |
|-----|-----------|--------|-------|-----------|-----------|
| SMG | NM_012106 | ARL2BP | chr16 | 57282448  | 57282555  |
| SMG | NM_012106 | ARL2BP | chr16 | 57283678  | 57283764  |
| SMG | NM_012106 | ARL2BP | chr16 | 57284322  | 57284419  |
| SMG | NM_012106 | ARL2BP | chr16 | 57286077  | 57287545  |
| SMG | NM_019048 | ASNSD1 | chr2  | 190526124 | 190526336 |
| SMG | NM_019048 | ASNSD1 | chr2  | 190528626 | 190528680 |
| SMG | NM_019048 | ASNSD1 | chr2  | 190530101 | 190530177 |
| SMG | NM_019048 | ASNSD1 | chr2  | 190530766 | 190532322 |
| SMG | NM_019048 | ASNSD1 | chr2  | 190532489 | 190532671 |
| SMG | NM_019048 | ASNSD1 | chr2  | 190535166 | 190535557 |
| CNV | NM_004318 | ASPH   | chr8  | 62413114  | 62416068  |
| CNV | NM_004318 | ASPH   | chr8  | 62430086  | 62430220  |
| CNV | NM_004318 | ASPH   | chr8  | 62430590  | 62430682  |
| CNV | NM_004318 | ASPH   | chr8  | 62438535  | 62438671  |
| CNV | NM_004318 | ASPH   | chr8  | 62460629  | 62460767  |
| CNV | NM_004318 | ASPH   | chr8  | 62465589  | 62465679  |
| CNV | NM_004318 | ASPH   | chr8  | 62468482  | 62468581  |
| CNV | NM_004318 | ASPH   | chr8  | 62475302  | 62475439  |
| CNV | NM_004318 | ASPH   | chr8  | 62479726  | 62479877  |
| CNV | NM_004318 | ASPH   | chr8  | 62489330  | 62489417  |
| CNV | NM_004318 | ASPH   | chr8  | 62496502  | 62496588  |
| CNV | NM_004318 | ASPH   | chr8  | 62531536  | 62531578  |
| CNV | NM_004318 | ASPH   | chr8  | 62546241  | 62546286  |
| CNV | NM_004318 | ASPH   | chr8  | 62550505  | 62550562  |
| CNV | NM_004318 | ASPH   | chr8  | 62550880  | 62550922  |
| CNV | NM_004318 | ASPH   | chr8  | 62555446  | 62555479  |
| CNV | NM_004318 | ASPH   | chr8  | 62555944  | 62555992  |
| CNV | NM_004318 | ASPH   | chr8  | 62556503  | 62556560  |
| CNV | NM_004318 | ASPH   | chr8  | 62557158  | 62557191  |
| CNV | NM_004318 | ASPH   | chr8  | 62559308  | 62559437  |
| CNV | NM_004318 | ASPH   | chr8  | 62563608  | 62563683  |
| CNV | NM_004318 | ASPH   | chr8  | 62566126  | 62566219  |
| CNV | NM_004318 | ASPH   | chr8  | 62593526  | 62593595  |
| CNV | NM_004318 | ASPH   | chr8  | 62596597  | 62596747  |
| CNV | NM_004318 | ASPH   | chr8  | 62626827  | 62627199  |
| SMG | NM_014065 | ASTE1  | chr3  | 130732720 | 130733231 |
| SMG | NM_014065 | ASTE1  | chr3  | 130734987 | 130735183 |
| SMG | NM_014065 | ASTE1  | chr3  | 130737349 | 130737560 |
| SMG | NM_014065 | ASTE1  | chr3  | 130742848 | 130744175 |
| SMG | NM_014065 | ASTE1  | chr3  | 130744317 | 130744438 |
| SMG | NM_014065 | ASTE1  | chr3  | 130745350 | 130745646 |
| SMG | NM_018036 | ATG2B  | chr14 | 96747594  | 96752322  |
| SMG | NM_018036 | ATG2B  | chr14 | 96755992  | 96756142  |

|     |              |       |       |          |          |
|-----|--------------|-------|-------|----------|----------|
| SMG | NM_018036    | ATG2B | chr14 | 96756772 | 96756927 |
| SMG | NM_018036    | ATG2B | chr14 | 96757150 | 96757272 |
| SMG | NM_018036    | ATG2B | chr14 | 96757936 | 96758019 |
| SMG | NM_018036    | ATG2B | chr14 | 96758365 | 96758435 |
| SMG | NM_018036    | ATG2B | chr14 | 96761296 | 96761504 |
| SMG | NM_018036    | ATG2B | chr14 | 96761818 | 96761897 |
| SMG | NM_018036    | ATG2B | chr14 | 96768343 | 96768445 |
| SMG | NM_018036    | ATG2B | chr14 | 96769397 | 96769592 |
| SMG | NM_018036    | ATG2B | chr14 | 96770831 | 96770940 |
| SMG | NM_018036    | ATG2B | chr14 | 96771925 | 96772152 |
| SMG | NM_018036    | ATG2B | chr14 | 96773050 | 96773253 |
| SMG | NM_018036    | ATG2B | chr14 | 96775789 | 96775931 |
| SMG | NM_018036    | ATG2B | chr14 | 96777453 | 96777624 |
| SMG | NM_018036    | ATG2B | chr14 | 96777878 | 96777955 |
| SMG | NM_018036    | ATG2B | chr14 | 96778425 | 96778496 |
| SMG | NM_018036    | ATG2B | chr14 | 96779401 | 96779494 |
| SMG | NM_018036    | ATG2B | chr14 | 96779665 | 96779772 |
| SMG | NM_018036    | ATG2B | chr14 | 96781490 | 96781571 |
| SMG | NM_018036    | ATG2B | chr14 | 96781720 | 96781920 |
| SMG | NM_018036    | ATG2B | chr14 | 96782869 | 96783020 |
| SMG | NM_018036    | ATG2B | chr14 | 96783481 | 96783654 |
| SMG | NM_018036    | ATG2B | chr14 | 96784034 | 96784192 |
| SMG | NM_018036    | ATG2B | chr14 | 96788448 | 96788591 |
| SMG | NM_018036    | ATG2B | chr14 | 96788876 | 96789072 |
| SMG | NM_018036    | ATG2B | chr14 | 96790232 | 96790335 |
| SMG | NM_018036    | ATG2B | chr14 | 96791985 | 96792259 |
| SMG | NM_018036    | ATG2B | chr14 | 96794683 | 96794872 |
| SMG | NM_018036    | ATG2B | chr14 | 96795010 | 96795103 |
| SMG | NM_018036    | ATG2B | chr14 | 96795820 | 96795971 |
| SMG | NM_018036    | ATG2B | chr14 | 96797712 | 96797974 |
| SMG | NM_018036    | ATG2B | chr14 | 96798641 | 96798747 |
| SMG | NM_018036    | ATG2B | chr14 | 96798837 | 96798992 |
| SMG | NM_018036    | ATG2B | chr14 | 96800024 | 96800210 |
| SMG | NM_018036    | ATG2B | chr14 | 96800741 | 96800838 |
| SMG | NM_018036    | ATG2B | chr14 | 96807858 | 96808038 |
| SMG | NM_018036    | ATG2B | chr14 | 96809455 | 96809618 |
| SMG | NM_018036    | ATG2B | chr14 | 96810990 | 96811093 |
| SMG | NM_018036    | ATG2B | chr14 | 96811569 | 96811722 |
| SMG | NM_018036    | ATG2B | chr14 | 96813515 | 96813678 |
| SMG | NM_018036    | ATG2B | chr14 | 96829151 | 96829678 |
| CNV | NM_001136031 | ATG7  | chr3  | 11314009 | 11314116 |
| CNV | NM_001136031 | ATG7  | chr3  | 11340159 | 11340329 |
| CNV | NM_001136031 | ATG7  | chr3  | 11340835 | 11340890 |

|     |              |      |       |           |           |
|-----|--------------|------|-------|-----------|-----------|
| CNV | NM_001136031 | ATG7 | chr3  | 11348416  | 11348534  |
| CNV | NM_001136031 | ATG7 | chr3  | 11350457  | 11350535  |
| CNV | NM_001136031 | ATG7 | chr3  | 11354777  | 11354894  |
| CNV | NM_001136031 | ATG7 | chr3  | 11356817  | 11356967  |
| CNV | NM_001136031 | ATG7 | chr3  | 11372813  | 11372902  |
| CNV | NM_001136031 | ATG7 | chr3  | 11374445  | 11374567  |
| CNV | NM_001136031 | ATG7 | chr3  | 11382118  | 11382209  |
| CNV | NM_001136031 | ATG7 | chr3  | 11383608  | 11383753  |
| CNV | NM_001136031 | ATG7 | chr3  | 11389350  | 11389509  |
| CNV | NM_001136031 | ATG7 | chr3  | 11399891  | 11400086  |
| CNV | NM_001136031 | ATG7 | chr3  | 11402054  | 11402258  |
| CNV | NM_001136031 | ATG7 | chr3  | 11404286  | 11404402  |
| CNV | NM_001136031 | ATG7 | chr3  | 11406132  | 11406208  |
| CNV | NM_001136031 | ATG7 | chr3  | 11468277  | 11468400  |
| CNV | NM_001136031 | ATG7 | chr3  | 11596284  | 11599139  |
| DRV | NM_000051    | ATM  | chr11 | 108093558 | 108093913 |
| DRV | NM_000051    | ATM  | chr11 | 108098321 | 108098423 |
| DRV | NM_000051    | ATM  | chr11 | 108098502 | 108098615 |
| DRV | NM_000051    | ATM  | chr11 | 108099904 | 108100050 |
| DRV | NM_000051    | ATM  | chr11 | 108106396 | 108106561 |
| DRV | NM_000051    | ATM  | chr11 | 108114679 | 108114845 |
| DRV | NM_000051    | ATM  | chr11 | 108115514 | 108115753 |
| DRV | NM_000051    | ATM  | chr11 | 108117690 | 108117854 |
| DRV | NM_000051    | ATM  | chr11 | 108119659 | 108119829 |
| DRV | NM_000051    | ATM  | chr11 | 108121427 | 108121799 |
| DRV | NM_000051    | ATM  | chr11 | 108122563 | 108122758 |
| DRV | NM_000051    | ATM  | chr11 | 108123543 | 108123639 |
| DRV | NM_000051    | ATM  | chr11 | 108124540 | 108124766 |
| DRV | NM_000051    | ATM  | chr11 | 108126941 | 108127067 |
| DRV | NM_000051    | ATM  | chr11 | 108128207 | 108128333 |
| DRV | NM_000051    | ATM  | chr11 | 108129712 | 108129802 |
| DRV | NM_000051    | ATM  | chr11 | 108137897 | 108138069 |
| DRV | NM_000051    | ATM  | chr11 | 108139136 | 108139336 |
| DRV | NM_000051    | ATM  | chr11 | 108141790 | 108141873 |
| DRV | NM_000051    | ATM  | chr11 | 108141977 | 108142133 |
| DRV | NM_000051    | ATM  | chr11 | 108143258 | 108143334 |
| DRV | NM_000051    | ATM  | chr11 | 108143448 | 108143579 |
| DRV | NM_000051    | ATM  | chr11 | 108150217 | 108150335 |
| DRV | NM_000051    | ATM  | chr11 | 108151721 | 108151895 |
| DRV | NM_000051    | ATM  | chr11 | 108153436 | 108153606 |
| DRV | NM_000051    | ATM  | chr11 | 108154953 | 108155200 |
| DRV | NM_000051    | ATM  | chr11 | 108158326 | 108158442 |
| DRV | NM_000051    | ATM  | chr11 | 108159703 | 108159830 |

|     |           |        |       |           |           |
|-----|-----------|--------|-------|-----------|-----------|
| DRV | NM_000051 | ATM    | chr11 | 108160328 | 108160528 |
| DRV | NM_000051 | ATM    | chr11 | 108163345 | 108163520 |
| DRV | NM_000051 | ATM    | chr11 | 108164039 | 108164204 |
| DRV | NM_000051 | ATM    | chr11 | 108165653 | 108165786 |
| DRV | NM_000051 | ATM    | chr11 | 108168013 | 108168109 |
| DRV | NM_000051 | ATM    | chr11 | 108170440 | 108170612 |
| DRV | NM_000051 | ATM    | chr11 | 108172374 | 108172516 |
| DRV | NM_000051 | ATM    | chr11 | 108173579 | 108173756 |
| DRV | NM_000051 | ATM    | chr11 | 108175401 | 108175579 |
| DRV | NM_000051 | ATM    | chr11 | 108178623 | 108178711 |
| DRV | NM_000051 | ATM    | chr11 | 108180886 | 108181042 |
| DRV | NM_000051 | ATM    | chr11 | 108183137 | 108183225 |
| DRV | NM_000051 | ATM    | chr11 | 108186549 | 108186638 |
| DRV | NM_000051 | ATM    | chr11 | 108186737 | 108186840 |
| DRV | NM_000051 | ATM    | chr11 | 108188099 | 108188248 |
| DRV | NM_000051 | ATM    | chr11 | 108190680 | 108190785 |
| DRV | NM_000051 | ATM    | chr11 | 108192027 | 108192147 |
| DRV | NM_000051 | ATM    | chr11 | 108196036 | 108196271 |
| DRV | NM_000051 | ATM    | chr11 | 108196784 | 108196952 |
| DRV | NM_000051 | ATM    | chr11 | 108198371 | 108198485 |
| DRV | NM_000051 | ATM    | chr11 | 108199747 | 108199965 |
| DRV | NM_000051 | ATM    | chr11 | 108200940 | 108201148 |
| DRV | NM_000051 | ATM    | chr11 | 108202170 | 108202284 |
| DRV | NM_000051 | ATM    | chr11 | 108202605 | 108202764 |
| DRV | NM_000051 | ATM    | chr11 | 108203488 | 108203627 |
| DRV | NM_000051 | ATM    | chr11 | 108204612 | 108204695 |
| DRV | NM_000051 | ATM    | chr11 | 108205695 | 108205836 |
| DRV | NM_000051 | ATM    | chr11 | 108206571 | 108206688 |
| DRV | NM_000051 | ATM    | chr11 | 108213948 | 108214098 |
| DRV | NM_000051 | ATM    | chr11 | 108216469 | 108216635 |
| DRV | NM_000051 | ATM    | chr11 | 108218005 | 108218092 |
| DRV | NM_000051 | ATM    | chr11 | 108224492 | 108224607 |
| DRV | NM_000051 | ATM    | chr11 | 108225537 | 108225601 |
| DRV | NM_000051 | ATM    | chr11 | 108235808 | 108235945 |
| DRV | NM_000051 | ATM    | chr11 | 108236051 | 108239826 |
| CNV | NM_024490 | ATP10A | chr15 | 25923859  | 25925121  |
| CNV | NM_024490 | ATP10A | chr15 | 25925267  | 25925455  |
| CNV | NM_024490 | ATP10A | chr15 | 25925956  | 25926061  |
| CNV | NM_024490 | ATP10A | chr15 | 25926140  | 25926221  |
| CNV | NM_024490 | ATP10A | chr15 | 25928432  | 25928633  |
| CNV | NM_024490 | ATP10A | chr15 | 25932849  | 25932975  |
| CNV | NM_024490 | ATP10A | chr15 | 25936861  | 25936938  |
| CNV | NM_024490 | ATP10A | chr15 | 25939965  | 25940293  |

|     |           |          |       |          |          |
|-----|-----------|----------|-------|----------|----------|
| CNV | NM_024490 | ATP10A   | chr15 | 25947062 | 25947247 |
| CNV | NM_024490 | ATP10A   | chr15 | 25953122 | 25953249 |
| CNV | NM_024490 | ATP10A   | chr15 | 25953343 | 25953447 |
| CNV | NM_024490 | ATP10A   | chr15 | 25958820 | 25959388 |
| CNV | NM_024490 | ATP10A   | chr15 | 25961876 | 25962071 |
| CNV | NM_024490 | ATP10A   | chr15 | 25963328 | 25963546 |
| CNV | NM_024490 | ATP10A   | chr15 | 25966803 | 25967056 |
| CNV | NM_024490 | ATP10A   | chr15 | 25969037 | 25969168 |
| CNV | NM_024490 | ATP10A   | chr15 | 25971097 | 25971229 |
| CNV | NM_024490 | ATP10A   | chr15 | 25972306 | 25972413 |
| CNV | NM_024490 | ATP10A   | chr15 | 25981202 | 25981288 |
| CNV | NM_024490 | ATP10A   | chr15 | 26026165 | 26026370 |
| CNV | NM_024490 | ATP10A   | chr15 | 26107794 | 26108349 |
| SMG | NM_152565 | ATP6V0D2 | chr8  | 87111138 | 87111337 |
| SMG | NM_152565 | ATP6V0D2 | chr8  | 87125937 | 87126109 |
| SMG | NM_152565 | ATP6V0D2 | chr8  | 87151685 | 87151864 |
| SMG | NM_152565 | ATP6V0D2 | chr8  | 87153678 | 87153758 |
| SMG | NM_152565 | ATP6V0D2 | chr8  | 87155105 | 87155183 |
| SMG | NM_152565 | ATP6V0D2 | chr8  | 87162340 | 87162517 |
| SMG | NM_152565 | ATP6V0D2 | chr8  | 87163694 | 87163769 |
| SMG | NM_152565 | ATP6V0D2 | chr8  | 87165044 | 87166454 |
| CNV | NM_015941 | ATP6V1H  | chr8  | 54628102 | 54628584 |
| CNV | NM_015941 | ATP6V1H  | chr8  | 54656136 | 54656250 |
| CNV | NM_015941 | ATP6V1H  | chr8  | 54669114 | 54669216 |
| CNV | NM_015941 | ATP6V1H  | chr8  | 54682177 | 54682303 |
| CNV | NM_015941 | ATP6V1H  | chr8  | 54684548 | 54684727 |
| CNV | NM_015941 | ATP6V1H  | chr8  | 54708206 | 54708399 |
| CNV | NM_015941 | ATP6V1H  | chr8  | 54714358 | 54714456 |
| CNV | NM_015941 | ATP6V1H  | chr8  | 54723723 | 54723777 |
| CNV | NM_015941 | ATP6V1H  | chr8  | 54727221 | 54727326 |
| CNV | NM_015941 | ATP6V1H  | chr8  | 54729976 | 54730090 |
| CNV | NM_015941 | ATP6V1H  | chr8  | 54742003 | 54742093 |
| CNV | NM_015941 | ATP6V1H  | chr8  | 54745543 | 54745646 |
| CNV | NM_015941 | ATP6V1H  | chr8  | 54754137 | 54754285 |
| CNV | NM_015941 | ATP6V1H  | chr8  | 54755593 | 54755871 |
| CNV | NM_000053 | ATP7B    | chr13 | 52506805 | 52509165 |
| CNV | NM_000053 | ATP7B    | chr13 | 52509728 | 52509831 |
| CNV | NM_000053 | ATP7B    | chr13 | 52511411 | 52511529 |
| CNV | NM_000053 | ATP7B    | chr13 | 52511611 | 52511815 |
| CNV | NM_000053 | ATP7B    | chr13 | 52513186 | 52513329 |
| CNV | NM_000053 | ATP7B    | chr13 | 52515216 | 52515360 |
| CNV | NM_000053 | ATP7B    | chr13 | 52516521 | 52516690 |
| CNV | NM_000053 | ATP7B    | chr13 | 52518244 | 52518427 |

|     |           |       |       |           |           |
|-----|-----------|-------|-------|-----------|-----------|
| CNV | NM_000053 | ATP7B | chr13 | 52520419  | 52520614  |
| CNV | NM_000053 | ATP7B | chr13 | 52523797  | 52523932  |
| CNV | NM_000053 | ATP7B | chr13 | 52524142  | 52524297  |
| CNV | NM_000053 | ATP7B | chr13 | 52524407  | 52524535  |
| CNV | NM_000053 | ATP7B | chr13 | 52531651  | 52531743  |
| CNV | NM_000053 | ATP7B | chr13 | 52532446  | 52532680  |
| CNV | NM_000053 | ATP7B | chr13 | 52534283  | 52534458  |
| CNV | NM_000053 | ATP7B | chr13 | 52535972  | 52536049  |
| CNV | NM_000053 | ATP7B | chr13 | 52539007  | 52539169  |
| CNV | NM_000053 | ATP7B | chr13 | 52542579  | 52542743  |
| CNV | NM_000053 | ATP7B | chr13 | 52544627  | 52544885  |
| CNV | NM_000053 | ATP7B | chr13 | 52548070  | 52549304  |
| CNV | NM_000053 | ATP7B | chr13 | 52585422  | 52585630  |
| LIT | NM_001184 | ATR   | chr3  | 142168076 | 142168444 |
| LIT | NM_001184 | ATR   | chr3  | 142171969 | 142172075 |
| LIT | NM_001184 | ATR   | chr3  | 142176445 | 142176597 |
| LIT | NM_001184 | ATR   | chr3  | 142177799 | 142177953 |
| LIT | NM_001184 | ATR   | chr3  | 142178068 | 142178225 |
| LIT | NM_001184 | ATR   | chr3  | 142180781 | 142180932 |
| LIT | NM_001184 | ATR   | chr3  | 142183938 | 142184082 |
| LIT | NM_001184 | ATR   | chr3  | 142185165 | 142185375 |
| LIT | NM_001184 | ATR   | chr3  | 142186775 | 142186910 |
| LIT | NM_001184 | ATR   | chr3  | 142188178 | 142188411 |
| LIT | NM_001184 | ATR   | chr3  | 142188927 | 142189025 |
| LIT | NM_001184 | ATR   | chr3  | 142203981 | 142204124 |
| LIT | NM_001184 | ATR   | chr3  | 142211973 | 142212153 |
| LIT | NM_001184 | ATR   | chr3  | 142215202 | 142215362 |
| LIT | NM_001184 | ATR   | chr3  | 142215854 | 142216034 |
| LIT | NM_001184 | ATR   | chr3  | 142217438 | 142217616 |
| LIT | NM_001184 | ATR   | chr3  | 142218468 | 142218560 |
| LIT | NM_001184 | ATR   | chr3  | 142222203 | 142222295 |
| LIT | NM_001184 | ATR   | chr3  | 142223980 | 142224145 |
| LIT | NM_001184 | ATR   | chr3  | 142226772 | 142226951 |
| LIT | NM_001184 | ATR   | chr3  | 142231101 | 142231312 |
| LIT | NM_001184 | ATR   | chr3  | 142232342 | 142232480 |
| LIT | NM_001184 | ATR   | chr3  | 142234236 | 142234357 |
| LIT | NM_001184 | ATR   | chr3  | 142238510 | 142238626 |
| LIT | NM_001184 | ATR   | chr3  | 142241569 | 142241683 |
| LIT | NM_001184 | ATR   | chr3  | 142242834 | 142243041 |
| LIT | NM_001184 | ATR   | chr3  | 142253921 | 142254047 |
| LIT | NM_001184 | ATR   | chr3  | 142254949 | 142255043 |
| LIT | NM_001184 | ATR   | chr3  | 142257323 | 142257467 |
| LIT | NM_001184 | ATR   | chr3  | 142259745 | 142259876 |

|     |           |         |       |           |           |
|-----|-----------|---------|-------|-----------|-----------|
| LIT | NM_001184 | ATR     | chr3  | 142261506 | 142261599 |
| LIT | NM_001184 | ATR     | chr3  | 142266566 | 142266752 |
| LIT | NM_001184 | ATR     | chr3  | 142268320 | 142268515 |
| LIT | NM_001184 | ATR     | chr3  | 142268973 | 142269144 |
| LIT | NM_001184 | ATR     | chr3  | 142272068 | 142272240 |
| LIT | NM_001184 | ATR     | chr3  | 142272481 | 142272582 |
| LIT | NM_001184 | ATR     | chr3  | 142272666 | 142272857 |
| LIT | NM_001184 | ATR     | chr3  | 142274718 | 142274981 |
| LIT | NM_001184 | ATR     | chr3  | 142275224 | 142275417 |
| LIT | NM_001184 | ATR     | chr3  | 142277465 | 142277618 |
| LIT | NM_001184 | ATR     | chr3  | 142278092 | 142278283 |
| LIT | NM_001184 | ATR     | chr3  | 142279104 | 142279296 |
| LIT | NM_001184 | ATR     | chr3  | 142280084 | 142280263 |
| LIT | NM_001184 | ATR     | chr3  | 142281073 | 142281951 |
| LIT | NM_001184 | ATR     | chr3  | 142284962 | 142285103 |
| LIT | NM_001184 | ATR     | chr3  | 142286904 | 142286996 |
| LIT | NM_001184 | ATR     | chr3  | 142297487 | 142297668 |
| LIT | NM_004655 | AXIN2   | chr17 | 63524682  | 63526220  |
| LIT | NM_004655 | AXIN2   | chr17 | 63530029  | 63530197  |
| LIT | NM_004655 | AXIN2   | chr17 | 63531743  | 63531839  |
| LIT | NM_004655 | AXIN2   | chr17 | 63532437  | 63532671  |
| LIT | NM_004655 | AXIN2   | chr17 | 63532986  | 63533181  |
| LIT | NM_004655 | AXIN2   | chr17 | 63533441  | 63533953  |
| LIT | NM_004655 | AXIN2   | chr17 | 63534320  | 63534461  |
| LIT | NM_004655 | AXIN2   | chr17 | 63537572  | 63537675  |
| LIT | NM_004655 | AXIN2   | chr17 | 63545637  | 63545778  |
| LIT | NM_004655 | AXIN2   | chr17 | 63553923  | 63554854  |
| LIT | NM_004655 | AXIN2   | chr17 | 63557567  | 63557740  |
| SMG | NM_004048 | B2M     | chr15 | 45003684  | 45003811  |
| SMG | NM_004048 | B2M     | chr15 | 45007620  | 45007899  |
| SMG | NM_004048 | B2M     | chr15 | 45008526  | 45008554  |
| SMG | NM_004048 | B2M     | chr15 | 45009804  | 45010357  |
| SMG | NM_006876 | B3GNT1  | chr11 | 66112842  | 66113711  |
| SMG | NM_006876 | B3GNT1  | chr11 | 66113960  | 66115161  |
| SMG | NM_004775 | B4GALT6 | chr18 | 29202208  | 29205724  |
| SMG | NM_004775 | B4GALT6 | chr18 | 29206245  | 29206347  |
| SMG | NM_004775 | B4GALT6 | chr18 | 29206961  | 29207084  |
| SMG | NM_004775 | B4GALT6 | chr18 | 29210921  | 29211109  |
| SMG | NM_004775 | B4GALT6 | chr18 | 29218606  | 29218723  |
| SMG | NM_004775 | B4GALT6 | chr18 | 29225317  | 29225442  |
| SMG | NM_004775 | B4GALT6 | chr18 | 29237938  | 29238052  |
| SMG | NM_004775 | B4GALT6 | chr18 | 29246218  | 29246335  |
| SMG | NM_004775 | B4GALT6 | chr18 | 29264274  | 29264686  |



|     |              |         |       |           |           |
|-----|--------------|---------|-------|-----------|-----------|
| CNV | NM_001187    | BAGE    | chr21 | 11057795  | 11058323  |
| CNV | NM_001187    | BAGE    | chr21 | 11059725  | 11059817  |
| CNV | NM_001187    | BAGE    | chr21 | 11089741  | 11089753  |
| CNV | NM_001187    | BAGE    | chr21 | 11097542  | 11097647  |
| CNV | NM_001187    | BAGE    | chr21 | 11098723  | 11098937  |
| LIT | NM_138761    | BAX     | chr19 | 49458116  | 49458219  |
| LIT | NM_138761    | BAX     | chr19 | 49458804  | 49458856  |
| LIT | NM_138761    | BAX     | chr19 | 49458943  | 49459090  |
| LIT | NM_138761    | BAX     | chr19 | 49459454  | 49459590  |
| LIT | NM_138761    | BAX     | chr19 | 49464066  | 49464171  |
| LIT | NM_138761    | BAX     | chr19 | 49464788  | 49465055  |
| SMG | NM_181708    | BCDIN3D | chr12 | 50229825  | 50232798  |
| SMG | NM_181708    | BCDIN3D | chr12 | 50236636  | 50236912  |
| SMG | NM_003921    | BCL10   | chr1  | 85731459  | 85733665  |
| SMG | NM_003921    | BCL10   | chr1  | 85736300  | 85736589  |
| SMG | NM_003921    | BCL10   | chr1  | 85741978  | 85742587  |
| SMG | NM_182557    | BCL9L   | chr11 | 118766850 | 118770217 |
| SMG | NM_182557    | BCL9L   | chr11 | 118770625 | 118770907 |
| SMG | NM_182557    | BCL9L   | chr11 | 118771327 | 118773617 |
| SMG | NM_182557    | BCL9L   | chr11 | 118773698 | 118773783 |
| SMG | NM_182557    | BCL9L   | chr11 | 118773944 | 118774161 |
| SMG | NM_182557    | BCL9L   | chr11 | 118778191 | 118778311 |
| SMG | NM_182557    | BCL9L   | chr11 | 118778978 | 118779364 |
| SMG | NM_182557    | BCL9L   | chr11 | 118780622 | 118781613 |
| SMG | NM_001123383 | BCOR    | chrX  | 39910498  | 39911653  |
| SMG | NM_001123383 | BCOR    | chrX  | 39913138  | 39913295  |
| SMG | NM_001123383 | BCOR    | chrX  | 39913508  | 39913586  |
| SMG | NM_001123383 | BCOR    | chrX  | 39914620  | 39914766  |
| SMG | NM_001123383 | BCOR    | chrX  | 39916407  | 39916574  |
| SMG | NM_001123383 | BCOR    | chrX  | 39921391  | 39921646  |
| SMG | NM_001123383 | BCOR    | chrX  | 39921998  | 39922324  |
| SMG | NM_001123383 | BCOR    | chrX  | 39922860  | 39923103  |
| SMG | NM_001123383 | BCOR    | chrX  | 39923588  | 39923852  |
| SMG | NM_001123383 | BCOR    | chrX  | 39930225  | 39930412  |
| SMG | NM_001123383 | BCOR    | chrX  | 39930889  | 39930943  |
| SMG | NM_001123383 | BCOR    | chrX  | 39931601  | 39934433  |
| SMG | NM_001123383 | BCOR    | chrX  | 39935706  | 39935785  |
| SMG | NM_001123383 | BCOR    | chrX  | 39937096  | 39937222  |
| SMG | NM_001123383 | BCOR    | chrX  | 40036259  | 40036582  |
| SMG | NM_001001786 | BLID    | chr11 | 121986061 | 121986923 |
| LIT | NM_000057    | BLM     | chr15 | 91260578  | 91260671  |
| LIT | NM_000057    | BLM     | chr15 | 91290618  | 91290720  |
| LIT | NM_000057    | BLM     | chr15 | 91292596  | 91293297  |

|     |              |        |       |          |          |
|-----|--------------|--------|-------|----------|----------|
| LIT | NM_000057    | BLM    | chr15 | 91295016 | 91295176 |
| LIT | NM_000057    | BLM    | chr15 | 91298040 | 91298168 |
| LIT | NM_000057    | BLM    | chr15 | 91303376 | 91303509 |
| LIT | NM_000057    | BLM    | chr15 | 91303823 | 91304485 |
| LIT | NM_000057    | BLM    | chr15 | 91306195 | 91306387 |
| LIT | NM_000057    | BLM    | chr15 | 91308525 | 91308644 |
| LIT | NM_000057    | BLM    | chr15 | 91310139 | 91310253 |
| LIT | NM_000057    | BLM    | chr15 | 91312362 | 91312461 |
| LIT | NM_000057    | BLM    | chr15 | 91312667 | 91312816 |
| LIT | NM_000057    | BLM    | chr15 | 91326051 | 91326158 |
| LIT | NM_000057    | BLM    | chr15 | 91328150 | 91328311 |
| LIT | NM_000057    | BLM    | chr15 | 91333878 | 91334074 |
| LIT | NM_000057    | BLM    | chr15 | 91337396 | 91337587 |
| LIT | NM_000057    | BLM    | chr15 | 91341419 | 91341567 |
| LIT | NM_000057    | BLM    | chr15 | 91346750 | 91346950 |
| LIT | NM_000057    | BLM    | chr15 | 91347396 | 91347589 |
| LIT | NM_000057    | BLM    | chr15 | 91352366 | 91352489 |
| LIT | NM_000057    | BLM    | chr15 | 91354434 | 91354636 |
| LIT | NM_000057    | BLM    | chr15 | 91358331 | 91358686 |
| LIT | NM_004329    | BMPR1A | chr10 | 88516395 | 88516676 |
| LIT | NM_004329    | BMPR1A | chr10 | 88598621 | 88598736 |
| LIT | NM_004329    | BMPR1A | chr10 | 88635623 | 88635842 |
| LIT | NM_004329    | BMPR1A | chr10 | 88649818 | 88649981 |
| LIT | NM_004329    | BMPR1A | chr10 | 88651883 | 88651986 |
| LIT | NM_004329    | BMPR1A | chr10 | 88659550 | 88659647 |
| LIT | NM_004329    | BMPR1A | chr10 | 88659783 | 88659883 |
| LIT | NM_004329    | BMPR1A | chr10 | 88671996 | 88672141 |
| LIT | NM_004329    | BMPR1A | chr10 | 88676890 | 88677083 |
| LIT | NM_004329    | BMPR1A | chr10 | 88678928 | 88679226 |
| LIT | NM_004329    | BMPR1A | chr10 | 88681276 | 88681452 |
| LIT | NM_004329    | BMPR1A | chr10 | 88683132 | 88683263 |
| LIT | NM_004329    | BMPR1A | chr10 | 88683350 | 88684945 |
| SMG | NM_001035505 | BOLA3  | chr2  | 74362527 | 74362785 |
| SMG | NM_001035505 | BOLA3  | chr2  | 74372315 | 74372430 |
| SMG | NM_001035505 | BOLA3  | chr2  | 74374947 | 74375039 |
| SMG | NM_130852    | BPIFA1 | chr20 | 31823801 | 31823856 |
| SMG | NM_130852    | BPIFA1 | chr20 | 31825502 | 31825677 |
| SMG | NM_130852    | BPIFA1 | chr20 | 31825860 | 31826020 |
| SMG | NM_130852    | BPIFA1 | chr20 | 31827608 | 31827716 |
| SMG | NM_130852    | BPIFA1 | chr20 | 31828038 | 31828191 |
| SMG | NM_130852    | BPIFA1 | chr20 | 31829190 | 31829275 |
| SMG | NM_130852    | BPIFA1 | chr20 | 31829861 | 31829925 |
| SMG | NM_130852    | BPIFA1 | chr20 | 31830292 | 31830367 |

|     |              |        |       |           |           |
|-----|--------------|--------|-------|-----------|-----------|
| SMG | NM_130852    | BPIFA1 | chr20 | 31830912  | 31831115  |
| DRV | NM_004333    | BRAF   | chr7  | 140433812 | 140434570 |
| DRV | NM_004333    | BRAF   | chr7  | 140439611 | 140439746 |
| DRV | NM_004333    | BRAF   | chr7  | 140449086 | 140449218 |
| DRV | NM_004333    | BRAF   | chr7  | 140453074 | 140453193 |
| DRV | NM_004333    | BRAF   | chr7  | 140453986 | 140454033 |
| DRV | NM_004333    | BRAF   | chr7  | 140476711 | 140476888 |
| DRV | NM_004333    | BRAF   | chr7  | 140477790 | 140477875 |
| DRV | NM_004333    | BRAF   | chr7  | 140481375 | 140481493 |
| DRV | NM_004333    | BRAF   | chr7  | 140482820 | 140482957 |
| DRV | NM_004333    | BRAF   | chr7  | 140487347 | 140487384 |
| DRV | NM_004333    | BRAF   | chr7  | 140494107 | 140494267 |
| DRV | NM_004333    | BRAF   | chr7  | 140500161 | 140500281 |
| DRV | NM_004333    | BRAF   | chr7  | 140501211 | 140501360 |
| DRV | NM_004333    | BRAF   | chr7  | 140507759 | 140507862 |
| DRV | NM_004333    | BRAF   | chr7  | 140508691 | 140508795 |
| DRV | NM_004333    | BRAF   | chr7  | 140534408 | 140534672 |
| DRV | NM_004333    | BRAF   | chr7  | 140549910 | 140550012 |
| DRV | NM_004333    | BRAF   | chr7  | 140624365 | 140624564 |
| SMG | NM_032430    | BRSK1  | chr19 | 55795533  | 55795946  |
| SMG | NM_032430    | BRSK1  | chr19 | 55798374  | 55798469  |
| SMG | NM_032430    | BRSK1  | chr19 | 55798581  | 55798667  |
| SMG | NM_032430    | BRSK1  | chr19 | 55800847  | 55800988  |
| SMG | NM_032430    | BRSK1  | chr19 | 55805384  | 55805501  |
| SMG | NM_032430    | BRSK1  | chr19 | 55805581  | 55805615  |
| SMG | NM_032430    | BRSK1  | chr19 | 55805696  | 55805765  |
| SMG | NM_032430    | BRSK1  | chr19 | 55812879  | 55813026  |
| SMG | NM_032430    | BRSK1  | chr19 | 55813504  | 55813536  |
| SMG | NM_032430    | BRSK1  | chr19 | 55814064  | 55814235  |
| SMG | NM_032430    | BRSK1  | chr19 | 55814678  | 55814776  |
| SMG | NM_032430    | BRSK1  | chr19 | 55815034  | 55815194  |
| SMG | NM_032430    | BRSK1  | chr19 | 55815417  | 55815478  |
| SMG | NM_032430    | BRSK1  | chr19 | 55815918  | 55816288  |
| SMG | NM_032430    | BRSK1  | chr19 | 55816688  | 55816737  |
| SMG | NM_032430    | BRSK1  | chr19 | 55816830  | 55816954  |
| SMG | NM_032430    | BRSK1  | chr19 | 55817619  | 55817818  |
| SMG | NM_032430    | BRSK1  | chr19 | 55820006  | 55820096  |
| SMG | NM_032430    | BRSK1  | chr19 | 55823278  | 55823903  |
| SMG | NM_001040462 | BTNL8  | chr5  | 180326076 | 180326359 |
| SMG | NM_001040462 | BTNL8  | chr5  | 180335585 | 180335933 |
| SMG | NM_001040462 | BTNL8  | chr5  | 180338338 | 180338614 |
| SMG | NM_001040462 | BTNL8  | chr5  | 180374511 | 180374625 |
| SMG | NM_001040462 | BTNL8  | chr5  | 180375354 | 180375375 |

|     |              |           |       |           |           |
|-----|--------------|-----------|-------|-----------|-----------|
| SMG | NM_001040462 | BTNL8     | chr5  | 180375919 | 180375946 |
| SMG | NM_001040462 | BTNL8     | chr5  | 180376238 | 180376265 |
| SMG | NM_001040462 | BTNL8     | chr5  | 180376903 | 180377906 |
| LIT | NM_001211    | BUB1B     | chr15 | 40453209  | 40453456  |
| LIT | NM_001211    | BUB1B     | chr15 | 40457253  | 40457397  |
| LIT | NM_001211    | BUB1B     | chr15 | 40462262  | 40462322  |
| LIT | NM_001211    | BUB1B     | chr15 | 40462737  | 40462882  |
| LIT | NM_001211    | BUB1B     | chr15 | 40468677  | 40468874  |
| LIT | NM_001211    | BUB1B     | chr15 | 40475914  | 40476084  |
| LIT | NM_001211    | BUB1B     | chr15 | 40477365  | 40477580  |
| LIT | NM_001211    | BUB1B     | chr15 | 40477751  | 40477843  |
| LIT | NM_001211    | BUB1B     | chr15 | 40488745  | 40488975  |
| LIT | NM_001211    | BUB1B     | chr15 | 40491815  | 40491928  |
| LIT | NM_001211    | BUB1B     | chr15 | 40492444  | 40492560  |
| LIT | NM_001211    | BUB1B     | chr15 | 40493131  | 40493181  |
| LIT | NM_001211    | BUB1B     | chr15 | 40494605  | 40494666  |
| LIT | NM_001211    | BUB1B     | chr15 | 40494789  | 40494895  |
| LIT | NM_001211    | BUB1B     | chr15 | 40498384  | 40498659  |
| LIT | NM_001211    | BUB1B     | chr15 | 40500837  | 40500971  |
| LIT | NM_001211    | BUB1B     | chr15 | 40501835  | 40501976  |
| LIT | NM_001211    | BUB1B     | chr15 | 40502310  | 40502411  |
| LIT | NM_001211    | BUB1B     | chr15 | 40504699  | 40504849  |
| LIT | NM_001211    | BUB1B     | chr15 | 40505532  | 40505675  |
| LIT | NM_001211    | BUB1B     | chr15 | 40509696  | 40509868  |
| LIT | NM_001211    | BUB1B     | chr15 | 40510656  | 40510763  |
| LIT | NM_001211    | BUB1B     | chr15 | 40512764  | 40513337  |
| CNV | NM_032024    | C10orf11  | chr10 | 77542518  | 77542780  |
| CNV | NM_032024    | C10orf11  | chr10 | 77795765  | 77795892  |
| CNV | NM_032024    | C10orf11  | chr10 | 77806921  | 77807061  |
| CNV | NM_032024    | C10orf11  | chr10 | 77818423  | 77818541  |
| CNV | NM_032024    | C10orf11  | chr10 | 78084158  | 78084243  |
| CNV | NM_032024    | C10orf11  | chr10 | 78316966  | 78317126  |
| LIT | NM_001202438 | C10orf137 | chr10 | 127408083 | 127408484 |
| LIT | NM_001202438 | C10orf137 | chr10 | 127409772 | 127409981 |
| LIT | NM_001202438 | C10orf137 | chr10 | 127411636 | 127411703 |
| LIT | NM_001202438 | C10orf137 | chr10 | 127412379 | 127412505 |
| LIT | NM_001202438 | C10orf137 | chr10 | 127413886 | 127414011 |
| LIT | NM_001202438 | C10orf137 | chr10 | 127414250 | 127414407 |
| LIT | NM_001202438 | C10orf137 | chr10 | 127417571 | 127417673 |
| LIT | NM_001202438 | C10orf137 | chr10 | 127417926 | 127418048 |
| LIT | NM_001202438 | C10orf137 | chr10 | 127418856 | 127418968 |
| LIT | NM_001202438 | C10orf137 | chr10 | 127421972 | 127422120 |
| LIT | NM_001202438 | C10orf137 | chr10 | 127422203 | 127422312 |

|     |              |           |       |           |           |
|-----|--------------|-----------|-------|-----------|-----------|
| LIT | NM_001202438 | C10orf137 | chr10 | 127422640 | 127422752 |
| LIT | NM_001202438 | C10orf137 | chr10 | 127424212 | 127424473 |
| LIT | NM_001202438 | C10orf137 | chr10 | 127426486 | 127426558 |
| LIT | NM_001202438 | C10orf137 | chr10 | 127426863 | 127427014 |
| LIT | NM_001202438 | C10orf137 | chr10 | 127429031 | 127429220 |
| LIT | NM_001202438 | C10orf137 | chr10 | 127429569 | 127429770 |
| LIT | NM_001202438 | C10orf137 | chr10 | 127431626 | 127431845 |
| LIT | NM_001202438 | C10orf137 | chr10 | 127434275 | 127434499 |
| LIT | NM_001202438 | C10orf137 | chr10 | 127436104 | 127436263 |
| LIT | NM_001202438 | C10orf137 | chr10 | 127436431 | 127436581 |
| LIT | NM_001202438 | C10orf137 | chr10 | 127437980 | 127438134 |
| LIT | NM_001202438 | C10orf137 | chr10 | 127441367 | 127441483 |
| LIT | NM_001202438 | C10orf137 | chr10 | 127442262 | 127442414 |
| LIT | NM_001202438 | C10orf137 | chr10 | 127451869 | 127452712 |
| SMG | NM_001009894 | C12orf29  | chr12 | 88429267  | 88429515  |
| SMG | NM_001009894 | C12orf29  | chr12 | 88433924  | 88434042  |
| SMG | NM_001009894 | C12orf29  | chr12 | 88436601  | 88436697  |
| SMG | NM_001009894 | C12orf29  | chr12 | 88437375  | 88437492  |
| SMG | NM_001009894 | C12orf29  | chr12 | 88439358  | 88439556  |
| SMG | NM_001009894 | C12orf29  | chr12 | 88440583  | 88440753  |
| SMG | NM_001009894 | C12orf29  | chr12 | 88442010  | 88443937  |
| SMG | NM_152319    | C12orf54  | chr12 | 48876285  | 48876359  |
| SMG | NM_152319    | C12orf54  | chr12 | 48877022  | 48877144  |
| SMG | NM_152319    | C12orf54  | chr12 | 48879960  | 48879991  |
| SMG | NM_152319    | C12orf54  | chr12 | 48880470  | 48880509  |
| SMG | NM_152319    | C12orf54  | chr12 | 48882706  | 48882739  |
| SMG | NM_152319    | C12orf54  | chr12 | 48884594  | 48884619  |
| SMG | NM_152319    | C12orf54  | chr12 | 48886729  | 48886778  |
| SMG | NM_152319    | C12orf54  | chr12 | 48888580  | 48888762  |
| SMG | NM_152319    | C12orf54  | chr12 | 48889963  | 48890297  |
| SMG | NM_001283056 | C14orf105 | chr14 | 57936017  | 57938308  |
| SMG | NM_001283056 | C14orf105 | chr14 | 57942299  | 57942422  |
| SMG | NM_001283056 | C14orf105 | chr14 | 57947312  | 57947472  |
| SMG | NM_001283056 | C14orf105 | chr14 | 57948276  | 57948375  |
| SMG | NM_001283056 | C14orf105 | chr14 | 57949782  | 57949869  |
| SMG | NM_001283056 | C14orf105 | chr14 | 57957706  | 57957789  |
| SMG | NM_001283056 | C14orf105 | chr14 | 57960210  | 57960581  |
| SMG | NM_001012706 | C14orf182 | chr14 | 50448429  | 50449022  |
| SMG | NM_001012706 | C14orf182 | chr14 | 50458973  | 50459043  |
| SMG | NM_001012706 | C14orf182 | chr14 | 50459495  | 50459591  |
| SMG | NM_001012706 | C14orf182 | chr14 | 50472311  | 50474238  |
| SMG | NM_001042367 | C15orf60  | chr15 | 73735498  | 73735685  |
| SMG | NM_001042367 | C15orf60  | chr15 | 73766172  | 73766262  |

|     |              |           |       |           |           |
|-----|--------------|-----------|-------|-----------|-----------|
| SMG | NM_001042367 | C15orf60  | chr15 | 73832825  | 73832909  |
| SMG | NM_001042367 | C15orf60  | chr15 | 73843278  | 73843491  |
| SMG | NM_001042367 | C15orf60  | chr15 | 73848642  | 73848732  |
| SMG | NM_001042367 | C15orf60  | chr15 | 73852092  | 73852353  |
| SMG | NM_033201    | C16orf45  | chr16 | 15528324  | 15528616  |
| SMG | NM_033201    | C16orf45  | chr16 | 15609161  | 15609285  |
| SMG | NM_033201    | C16orf45  | chr16 | 15661839  | 15661913  |
| SMG | NM_033201    | C16orf45  | chr16 | 15675073  | 15675188  |
| SMG | NM_033201    | C16orf45  | chr16 | 15677012  | 15677095  |
| SMG | NM_033201    | C16orf45  | chr16 | 15680573  | 15682116  |
| SMG | NM_001001436 | C16orf87  | chr16 | 46835958  | 46836982  |
| SMG | NM_001001436 | C16orf87  | chr16 | 46843514  | 46843697  |
| SMG | NM_001001436 | C16orf87  | chr16 | 46858297  | 46858394  |
| SMG | NM_001001436 | C16orf87  | chr16 | 46864995  | 46865074  |
| CNV | NM_001256047 | C19orf12  | chr19 | 30189792  | 30193884  |
| CNV | NM_001256047 | C19orf12  | chr19 | 30199160  | 30199330  |
| CNV | NM_001256047 | C19orf12  | chr19 | 30206469  | 30206696  |
| SMG | NM_001011551 | C1GALT1C1 | chrX  | 119759528 | 119761026 |
| SMG | NM_001011551 | C1GALT1C1 | chrX  | 119763771 | 119764005 |
| SMG | NM_001010979 | C1orf189  | chr1  | 154171561 | 154172004 |
| SMG | NM_001010979 | C1orf189  | chr1  | 154172934 | 154173064 |
| SMG | NM_001010979 | C1orf189  | chr1  | 154178073 | 154178114 |
| SMG | NM_001010979 | C1orf189  | chr1  | 154178750 | 154178841 |
| SMG | NM_001207062 | C22orf23  | chr22 | 38339056  | 38340253  |
| SMG | NM_001207062 | C22orf23  | chr22 | 38340423  | 38340524  |
| SMG | NM_001207062 | C22orf23  | chr22 | 38341048  | 38341180  |
| SMG | NM_001207062 | C22orf23  | chr22 | 38343287  | 38343470  |
| SMG | NM_001207062 | C22orf23  | chr22 | 38349053  | 38349165  |
| SMG | NM_001207062 | C22orf23  | chr22 | 38349624  | 38349676  |
| SMG | NM_001142319 | C2orf44   | chr2  | 24252205  | 24254032  |
| SMG | NM_001142319 | C2orf44   | chr2  | 24260546  | 24262382  |
| SMG | NM_001142319 | C2orf44   | chr2  | 24270183  | 24270296  |
| CNV | NM_001115131 | C6        | chr5  | 41142247  | 41143108  |
| CNV | NM_001115131 | C6        | chr5  | 41149342  | 41149584  |
| CNV | NM_001115131 | C6        | chr5  | 41150036  | 41150127  |
| CNV | NM_001115131 | C6        | chr5  | 41153911  | 41154100  |
| CNV | NM_001115131 | C6        | chr5  | 41155073  | 41155206  |
| CNV | NM_001115131 | C6        | chr5  | 41158775  | 41158887  |
| CNV | NM_001115131 | C6        | chr5  | 41159183  | 41159355  |
| CNV | NM_001115131 | C6        | chr5  | 41160243  | 41160469  |
| CNV | NM_001115131 | C6        | chr5  | 41161794  | 41161961  |
| CNV | NM_001115131 | C6        | chr5  | 41172326  | 41172449  |
| CNV | NM_001115131 | C6        | chr5  | 41176576  | 41176817  |

|     |              |          |       |           |           |
|-----|--------------|----------|-------|-----------|-----------|
| CNV | NM_001115131 | C6       | chr5  | 41181460  | 41181661  |
| CNV | NM_001115131 | C6       | chr5  | 41186171  | 41186310  |
| CNV | NM_001115131 | C6       | chr5  | 41195893  | 41196035  |
| CNV | NM_001115131 | C6       | chr5  | 41199869  | 41200014  |
| CNV | NM_001115131 | C6       | chr5  | 41201659  | 41201816  |
| CNV | NM_001115131 | C6       | chr5  | 41203189  | 41203352  |
| CNV | NM_001115131 | C6       | chr5  | 41261295  | 41261540  |
| SMG | NM_001142468 | C6orf203 | chr6  | 107349406 | 107350001 |
| SMG | NM_001142468 | C6orf203 | chr6  | 107360952 | 107361434 |
| SMG | NM_001142468 | C6orf203 | chr6  | 107365463 | 107365536 |
| SMG | NM_001142468 | C6orf203 | chr6  | 107372260 | 107372547 |
| SMG | NM_001286562 | C6orf211 | chr6  | 151773392 | 151773721 |
| SMG | NM_001286562 | C6orf211 | chr6  | 151779462 | 151779707 |
| SMG | NM_001286562 | C6orf211 | chr6  | 151785587 | 151785753 |
| SMG | NM_001286562 | C6orf211 | chr6  | 151789477 | 151791234 |
| SMG | NM_152706    | C7orf62  | chr7  | 88423419  | 88424360  |
| SMG | NM_152706    | C7orf62  | chr7  | 88424953  | 88425031  |
| CNV | NM_004056    | CA8      | chr8  | 61101422  | 61102544  |
| CNV | NM_004056    | CA8      | chr8  | 61121308  | 61121478  |
| CNV | NM_004056    | CA8      | chr8  | 61135207  | 61135320  |
| CNV | NM_004056    | CA8      | chr8  | 61137095  | 61137144  |
| CNV | NM_004056    | CA8      | chr8  | 61139431  | 61139494  |
| CNV | NM_004056    | CA8      | chr8  | 61144842  | 61144938  |
| CNV | NM_004056    | CA8      | chr8  | 61178483  | 61178608  |
| CNV | NM_004056    | CA8      | chr8  | 61192247  | 61192439  |
| CNV | NM_004056    | CA8      | chr8  | 61193606  | 61193954  |
| CNV | NM_000719    | CACNA1C  | chr12 | 2162415   | 2162777   |
| CNV | NM_000719    | CACNA1C  | chr12 | 2224389   | 2224711   |
| CNV | NM_000719    | CACNA1C  | chr12 | 2229490   | 2229596   |
| CNV | NM_000719    | CACNA1C  | chr12 | 2558141   | 2558281   |
| CNV | NM_000719    | CACNA1C  | chr12 | 2566732   | 2566872   |
| CNV | NM_000719    | CACNA1C  | chr12 | 2595269   | 2595428   |
| CNV | NM_000719    | CACNA1C  | chr12 | 2602355   | 2602552   |
| CNV | NM_000719    | CACNA1C  | chr12 | 2614007   | 2614111   |
| CNV | NM_000719    | CACNA1C  | chr12 | 2621977   | 2622150   |
| CNV | NM_000719    | CACNA1C  | chr12 | 2659108   | 2659199   |
| CNV | NM_000719    | CACNA1C  | chr12 | 2666116   | 2666143   |
| CNV | NM_000719    | CACNA1C  | chr12 | 2675587   | 2675748   |
| CNV | NM_000719    | CACNA1C  | chr12 | 2676734   | 2676960   |
| CNV | NM_000719    | CACNA1C  | chr12 | 2690755   | 2690963   |
| CNV | NM_000719    | CACNA1C  | chr12 | 2691987   | 2692108   |
| CNV | NM_000719    | CACNA1C  | chr12 | 2693668   | 2693783   |
| CNV | NM_000719    | CACNA1C  | chr12 | 2694541   | 2694662   |

|     |              |         |       |         |         |
|-----|--------------|---------|-------|---------|---------|
| CNV | NM_000719    | CACNA1C | chr12 | 2695000 | 2695070 |
| CNV | NM_000719    | CACNA1C | chr12 | 2702378 | 2702511 |
| CNV | NM_000719    | CACNA1C | chr12 | 2705039 | 2705169 |
| CNV | NM_000719    | CACNA1C | chr12 | 2706395 | 2706455 |
| CNV | NM_000719    | CACNA1C | chr12 | 2711019 | 2711126 |
| CNV | NM_000719    | CACNA1C | chr12 | 2714246 | 2714334 |
| CNV | NM_000719    | CACNA1C | chr12 | 2714844 | 2714952 |
| CNV | NM_000719    | CACNA1C | chr12 | 2715776 | 2715829 |
| CNV | NM_000719    | CACNA1C | chr12 | 2716149 | 2716296 |
| CNV | NM_000719    | CACNA1C | chr12 | 2717676 | 2717878 |
| CNV | NM_000719    | CACNA1C | chr12 | 2719706 | 2719865 |
| CNV | NM_000719    | CACNA1C | chr12 | 2721068 | 2721179 |
| CNV | NM_000719    | CACNA1C | chr12 | 2743462 | 2743546 |
| CNV | NM_000719    | CACNA1C | chr12 | 2757640 | 2757673 |
| CNV | NM_000719    | CACNA1C | chr12 | 2760805 | 2760934 |
| CNV | NM_000719    | CACNA1C | chr12 | 2763000 | 2763066 |
| CNV | NM_000719    | CACNA1C | chr12 | 2764312 | 2764404 |
| CNV | NM_000719    | CACNA1C | chr12 | 2773990 | 2774156 |
| CNV | NM_000719    | CACNA1C | chr12 | 2774746 | 2774874 |
| CNV | NM_000719    | CACNA1C | chr12 | 2775851 | 2775948 |
| CNV | NM_000719    | CACNA1C | chr12 | 2778098 | 2778201 |
| CNV | NM_000719    | CACNA1C | chr12 | 2783706 | 2783808 |
| CNV | NM_000719    | CACNA1C | chr12 | 2786259 | 2786387 |
| CNV | NM_000719    | CACNA1C | chr12 | 2786898 | 2787033 |
| CNV | NM_000719    | CACNA1C | chr12 | 2788609 | 2788962 |
| CNV | NM_000719    | CACNA1C | chr12 | 2791715 | 2791844 |
| CNV | NM_000719    | CACNA1C | chr12 | 2794901 | 2795008 |
| CNV | NM_000719    | CACNA1C | chr12 | 2795331 | 2795435 |
| CNV | NM_000719    | CACNA1C | chr12 | 2797612 | 2797945 |
| CNV | NM_000719    | CACNA1C | chr12 | 2800065 | 2807115 |
| SMG | NM_001171166 | CAMTA2  | chr17 | 4871286 | 4872114 |
| SMG | NM_001171166 | CAMTA2  | chr17 | 4872201 | 4872276 |
| SMG | NM_001171166 | CAMTA2  | chr17 | 4872444 | 4872632 |
| SMG | NM_001171166 | CAMTA2  | chr17 | 4872924 | 4872996 |
| SMG | NM_001171166 | CAMTA2  | chr17 | 4873196 | 4873380 |
| SMG | NM_001171166 | CAMTA2  | chr17 | 4873634 | 4873831 |
| SMG | NM_001171166 | CAMTA2  | chr17 | 4875526 | 4875831 |
| SMG | NM_001171166 | CAMTA2  | chr17 | 4876063 | 4876286 |
| SMG | NM_001171166 | CAMTA2  | chr17 | 4876469 | 4876548 |
| SMG | NM_001171166 | CAMTA2  | chr17 | 4876879 | 4877064 |
| SMG | NM_001171166 | CAMTA2  | chr17 | 4877679 | 4877795 |
| SMG | NM_001171166 | CAMTA2  | chr17 | 4880352 | 4880487 |
| SMG | NM_001171166 | CAMTA2  | chr17 | 4881798 | 4881925 |



|     |              |        |       |           |           |
|-----|--------------|--------|-------|-----------|-----------|
| SMG | NM_001171166 | CAMTA2 | chr17 | 4882978   | 4883916   |
| SMG | NM_001171166 | CAMTA2 | chr17 | 4884519   | 4884654   |
| SMG | NM_001171166 | CAMTA2 | chr17 | 4884972   | 4885126   |
| SMG | NM_001171166 | CAMTA2 | chr17 | 4885383   | 4885455   |
| SMG | NM_001171166 | CAMTA2 | chr17 | 4886051   | 4886187   |
| SMG | NM_001171166 | CAMTA2 | chr17 | 4886270   | 4886338   |
| SMG | NM_001171166 | CAMTA2 | chr17 | 4889174   | 4889278   |
| SMG | NM_001171166 | CAMTA2 | chr17 | 4890887   | 4890960   |
| DRV | NM_032415    | CARD11 | chr7  | 2945709   | 2946476   |
| DRV | NM_032415    | CARD11 | chr7  | 2949683   | 2949799   |
| DRV | NM_032415    | CARD11 | chr7  | 2951805   | 2951930   |
| DRV | NM_032415    | CARD11 | chr7  | 2952920   | 2953100   |
| DRV | NM_032415    | CARD11 | chr7  | 2954870   | 2955006   |
| DRV | NM_032415    | CARD11 | chr7  | 2956923   | 2957019   |
| DRV | NM_032415    | CARD11 | chr7  | 2958124   | 2958221   |
| DRV | NM_032415    | CARD11 | chr7  | 2959005   | 2959246   |
| DRV | NM_032415    | CARD11 | chr7  | 2962267   | 2962394   |
| DRV | NM_032415    | CARD11 | chr7  | 2962765   | 2962967   |
| DRV | NM_032415    | CARD11 | chr7  | 2963866   | 2963999   |
| DRV | NM_032415    | CARD11 | chr7  | 2966372   | 2966425   |
| DRV | NM_032415    | CARD11 | chr7  | 2968231   | 2968332   |
| DRV | NM_032415    | CARD11 | chr7  | 2969625   | 2969708   |
| DRV | NM_032415    | CARD11 | chr7  | 2972168   | 2972220   |
| DRV | NM_032415    | CARD11 | chr7  | 2974086   | 2974263   |
| DRV | NM_032415    | CARD11 | chr7  | 2976670   | 2976868   |
| DRV | NM_032415    | CARD11 | chr7  | 2977540   | 2977666   |
| DRV | NM_032415    | CARD11 | chr7  | 2978312   | 2978465   |
| DRV | NM_032415    | CARD11 | chr7  | 2979382   | 2979562   |
| DRV | NM_032415    | CARD11 | chr7  | 2983845   | 2984171   |
| DRV | NM_032415    | CARD11 | chr7  | 2985452   | 2985590   |
| DRV | NM_032415    | CARD11 | chr7  | 2987208   | 2987421   |
| DRV | NM_032415    | CARD11 | chr7  | 2998133   | 2998265   |
| DRV | NM_032415    | CARD11 | chr7  | 3083300   | 3083579   |
| CNV | NR_024393    | CASC8  | chr8  | 128455594 | 128455965 |
| CNV | NR_024393    | CASC8  | chr8  | 128491327 | 128491415 |
| CNV | NR_024393    | CASC8  | chr8  | 128491948 | 128492051 |
| CNV | NR_024393    | CASC8  | chr8  | 128492972 | 128493316 |
| CNV | NR_024393    | CASC8  | chr8  | 128493878 | 128494384 |
| SMG | NM_022900    | CASD1  | chr7  | 94139169  | 94139529  |
| SMG | NM_022900    | CASD1  | chr7  | 94146871  | 94146968  |
| SMG | NM_022900    | CASD1  | chr7  | 94147514  | 94147635  |
| SMG | NM_022900    | CASD1  | chr7  | 94156473  | 94156518  |
| SMG | NM_022900    | CASD1  | chr7  | 94157499  | 94157562  |

|     |              |        |       |           |           |
|-----|--------------|--------|-------|-----------|-----------|
| SMG | NM_022900    | CASD1  | chr7  | 94162516  | 94162561  |
| SMG | NM_022900    | CASD1  | chr7  | 94162990  | 94163114  |
| SMG | NM_022900    | CASD1  | chr7  | 94164620  | 94164835  |
| SMG | NM_022900    | CASD1  | chr7  | 94166783  | 94167206  |
| SMG | NM_022900    | CASD1  | chr7  | 94168278  | 94168368  |
| SMG | NM_022900    | CASD1  | chr7  | 94173722  | 94173842  |
| SMG | NM_022900    | CASD1  | chr7  | 94174856  | 94175013  |
| SMG | NM_022900    | CASD1  | chr7  | 94176407  | 94176487  |
| SMG | NM_022900    | CASD1  | chr7  | 94178844  | 94178946  |
| SMG | NM_022900    | CASD1  | chr7  | 94180649  | 94180790  |
| SMG | NM_022900    | CASD1  | chr7  | 94181661  | 94181739  |
| SMG | NM_022900    | CASD1  | chr7  | 94183794  | 94183887  |
| SMG | NM_022900    | CASD1  | chr7  | 94184803  | 94186328  |
| SMG | NM_012114    | CASP14 | chr19 | 15160290  | 15160456  |
| SMG | NM_012114    | CASP14 | chr19 | 15163016  | 15163089  |
| SMG | NM_012114    | CASP14 | chr19 | 15164292  | 15164442  |
| SMG | NM_012114    | CASP14 | chr19 | 15164543  | 15164769  |
| SMG | NM_012114    | CASP14 | chr19 | 15165968  | 15166085  |
| SMG | NM_012114    | CASP14 | chr19 | 15166240  | 15166344  |
| SMG | NM_012114    | CASP14 | chr19 | 15166795  | 15169103  |
| LIT | NM_001136109 | CASP5  | chr11 | 104864966 | 104865074 |
| LIT | NM_001136109 | CASP5  | chr11 | 104866466 | 104866569 |
| LIT | NM_001136109 | CASP5  | chr11 | 104868109 | 104868219 |
| LIT | NM_001136109 | CASP5  | chr11 | 104869611 | 104869755 |
| LIT | NM_001136109 | CASP5  | chr11 | 104870987 | 104871222 |
| LIT | NM_001136109 | CASP5  | chr11 | 104872754 | 104872928 |
| LIT | NM_001136109 | CASP5  | chr11 | 104874000 | 104874110 |
| LIT | NM_001136109 | CASP5  | chr11 | 104877809 | 104878061 |
| LIT | NM_001136109 | CASP5  | chr11 | 104893856 | 104893895 |
| SMG | NM_001080124 | CASP8  | chr2  | 202098165 | 202098277 |
| SMG | NM_001080124 | CASP8  | chr2  | 202098738 | 202098835 |
| SMG | NM_001080124 | CASP8  | chr2  | 202131183 | 202131514 |
| SMG | NM_001080124 | CASP8  | chr2  | 202136238 | 202136344 |
| SMG | NM_001080124 | CASP8  | chr2  | 202137360 | 202137499 |
| SMG | NM_001080124 | CASP8  | chr2  | 202139611 | 202139676 |
| SMG | NM_001080124 | CASP8  | chr2  | 202141549 | 202141691 |
| SMG | NM_001080124 | CASP8  | chr2  | 202149538 | 202150040 |
| SMG | NM_001080124 | CASP8  | chr2  | 202151181 | 202152434 |
| DRV | NM_005188    | CBL    | chr11 | 119076985 | 119077322 |
| DRV | NM_005188    | CBL    | chr11 | 119103157 | 119103405 |
| DRV | NM_005188    | CBL    | chr11 | 119142444 | 119142591 |
| DRV | NM_005188    | CBL    | chr11 | 119144577 | 119144734 |
| DRV | NM_005188    | CBL    | chr11 | 119145541 | 119145663 |

|     |              |         |       |           |           |
|-----|--------------|---------|-------|-----------|-----------|
| DRV | NM_005188    | CBL     | chr11 | 119146706 | 119146844 |
| DRV | NM_005188    | CBL     | chr11 | 119148466 | 119148554 |
| DRV | NM_005188    | CBL     | chr11 | 119148875 | 119149007 |
| DRV | NM_005188    | CBL     | chr11 | 119149219 | 119149423 |
| DRV | NM_005188    | CBL     | chr11 | 119155678 | 119155810 |
| DRV | NM_005188    | CBL     | chr11 | 119155898 | 119156276 |
| DRV | NM_005188    | CBL     | chr11 | 119158561 | 119158656 |
| DRV | NM_005188    | CBL     | chr11 | 119167627 | 119167744 |
| DRV | NM_005188    | CBL     | chr11 | 119168093 | 119168191 |
| DRV | NM_005188    | CBL     | chr11 | 119169067 | 119169250 |
| DRV | NM_005188    | CBL     | chr11 | 119170204 | 119178859 |
| SMG | NM_001258395 | CCDC103 | chr17 | 42977079  | 42977197  |
| SMG | NM_001258395 | CCDC103 | chr17 | 42978357  | 42978509  |
| SMG | NM_001258395 | CCDC103 | chr17 | 42978887  | 42979020  |
| SMG | NM_001258395 | CCDC103 | chr17 | 42979732  | 42981047  |
| SMG | NM_001145411 | CCDC110 | chr4  | 186366337 | 186366696 |
| SMG | NM_001145411 | CCDC110 | chr4  | 186379279 | 186381392 |
| SMG | NM_001145411 | CCDC110 | chr4  | 186383796 | 186383862 |
| SMG | NM_001145411 | CCDC110 | chr4  | 186384147 | 186384203 |
| SMG | NM_001145411 | CCDC110 | chr4  | 186392098 | 186392203 |
| SMG | NM_001145411 | CCDC110 | chr4  | 186392827 | 186392913 |
| SMG | NM_199287    | CCDC137 | chr17 | 79633760  | 79633930  |
| SMG | NM_199287    | CCDC137 | chr17 | 79634758  | 79634892  |
| SMG | NM_199287    | CCDC137 | chr17 | 79637254  | 79637483  |
| SMG | NM_199287    | CCDC137 | chr17 | 79638773  | 79638856  |
| SMG | NM_199287    | CCDC137 | chr17 | 79639105  | 79639185  |
| SMG | NM_199287    | CCDC137 | chr17 | 79639524  | 79640936  |
| SMG | NM_001101357 | CCDC160 | chrX  | 133371076 | 133371373 |
| SMG | NM_001101357 | CCDC160 | chrX  | 133378806 | 133379808 |
| CNV | NM_001144982 | CCDC169 | chr13 | 36801178  | 36801518  |
| CNV | NM_001144982 | CCDC169 | chr13 | 36822742  | 36822819  |
| CNV | NM_001144982 | CCDC169 | chr13 | 36827939  | 36827993  |
| CNV | NM_001144982 | CCDC169 | chr13 | 36828181  | 36828280  |
| CNV | NM_001144982 | CCDC169 | chr13 | 36857605  | 36857646  |
| CNV | NM_001144982 | CCDC169 | chr13 | 36857728  | 36857839  |
| CNV | NM_001144982 | CCDC169 | chr13 | 36871773  | 36871992  |
| CNV | NM_148672    | CCL28   | chr5  | 43381599  | 43382154  |
| CNV | NM_148672    | CCL28   | chr5  | 43388451  | 43388578  |
| CNV | NM_148672    | CCL28   | chr5  | 43412354  | 43412488  |
| CNV | NM_001145065 | CCSER1  | chr4  | 91048683  | 91048982  |
| CNV | NM_001145065 | CCSER1  | chr4  | 91229394  | 91230759  |
| CNV | NM_001145065 | CCSER1  | chr4  | 91234013  | 91234198  |
| CNV | NM_001145065 | CCSER1  | chr4  | 91321186  | 91321280  |

|     |              |        |       |           |           |
|-----|--------------|--------|-------|-----------|-----------|
| CNV | NM_001145065 | CCSER1 | chr4  | 91389384  | 91389505  |
| CNV | NM_001145065 | CCSER1 | chr4  | 91549175  | 91549383  |
| CNV | NM_001145065 | CCSER1 | chr4  | 91645064  | 91645142  |
| CNV | NM_001145065 | CCSER1 | chr4  | 91736912  | 91736996  |
| CNV | NM_001145065 | CCSER1 | chr4  | 91844520  | 91844598  |
| CNV | NM_001145065 | CCSER1 | chr4  | 92007100  | 92007145  |
| CNV | NM_001145065 | CCSER1 | chr4  | 92519722  | 92523370  |
| LIT | NM_001159587 | CD109  | chr6  | 74405507  | 74406012  |
| LIT | NM_001159587 | CD109  | chr6  | 74407122  | 74407295  |
| LIT | NM_001159587 | CD109  | chr6  | 74432973  | 74433002  |
| LIT | NM_001159587 | CD109  | chr6  | 74440066  | 74440297  |
| LIT | NM_001159587 | CD109  | chr6  | 74446105  | 74446231  |
| LIT | NM_001159587 | CD109  | chr6  | 74466365  | 74466405  |
| LIT | NM_001159587 | CD109  | chr6  | 74468666  | 74468751  |
| LIT | NM_001159587 | CD109  | chr6  | 74472106  | 74472203  |
| LIT | NM_001159587 | CD109  | chr6  | 74472463  | 74472605  |
| LIT | NM_001159587 | CD109  | chr6  | 74473298  | 74473408  |
| LIT | NM_001159587 | CD109  | chr6  | 74475652  | 74475877  |
| LIT | NM_001159587 | CD109  | chr6  | 74476481  | 74476583  |
| LIT | NM_001159587 | CD109  | chr6  | 74476670  | 74476733  |
| LIT | NM_001159587 | CD109  | chr6  | 74477777  | 74477954  |
| LIT | NM_001159587 | CD109  | chr6  | 74481151  | 74481304  |
| LIT | NM_001159587 | CD109  | chr6  | 74490146  | 74490221  |
| LIT | NM_001159587 | CD109  | chr6  | 74490981  | 74491042  |
| LIT | NM_001159587 | CD109  | chr6  | 74492336  | 74492478  |
| LIT | NM_001159587 | CD109  | chr6  | 74493429  | 74493547  |
| LIT | NM_001159587 | CD109  | chr6  | 74495086  | 74495200  |
| LIT | NM_001159587 | CD109  | chr6  | 74496956  | 74497175  |
| LIT | NM_001159587 | CD109  | chr6  | 74498190  | 74498335  |
| LIT | NM_001159587 | CD109  | chr6  | 74502348  | 74502525  |
| LIT | NM_001159587 | CD109  | chr6  | 74512942  | 74513024  |
| LIT | NM_001159587 | CD109  | chr6  | 74516566  | 74516795  |
| LIT | NM_001159587 | CD109  | chr6  | 74517805  | 74517971  |
| LIT | NM_001159587 | CD109  | chr6  | 74519706  | 74519897  |
| LIT | NM_001159587 | CD109  | chr6  | 74520714  | 74520819  |
| LIT | NM_001159587 | CD109  | chr6  | 74521927  | 74521993  |
| LIT | NM_001159587 | CD109  | chr6  | 74524703  | 74524846  |
| LIT | NM_001159587 | CD109  | chr6  | 74528110  | 74528258  |
| LIT | NM_001159587 | CD109  | chr6  | 74530184  | 74530287  |
| LIT | NM_001159587 | CD109  | chr6  | 74533181  | 74538041  |
| LIT | NM_020404    | CD248  | chr11 | 66081957  | 66084515  |
| LIT | NM_002389    | CD46   | chr1  | 207925382 | 207925654 |
| LIT | NM_002389    | CD46   | chr1  | 207930358 | 207930547 |

|     |              |        |       |           |           |
|-----|--------------|--------|-------|-----------|-----------|
| LIT | NM_002389    | CD46   | chr1  | 207930884 | 207930987 |
| LIT | NM_002389    | CD46   | chr1  | 207932983 | 207933069 |
| LIT | NM_002389    | CD46   | chr1  | 207934593 | 207934791 |
| LIT | NM_002389    | CD46   | chr1  | 207940357 | 207940540 |
| LIT | NM_002389    | CD46   | chr1  | 207940951 | 207940996 |
| LIT | NM_002389    | CD46   | chr1  | 207941123 | 207941168 |
| LIT | NM_002389    | CD46   | chr1  | 207943665 | 207943707 |
| LIT | NM_002389    | CD46   | chr1  | 207956636 | 207956675 |
| LIT | NM_002389    | CD46   | chr1  | 207958415 | 207958451 |
| LIT | NM_002389    | CD46   | chr1  | 207958963 | 207959027 |
| LIT | NM_002389    | CD46   | chr1  | 207963597 | 207963690 |
| LIT | NM_002389    | CD46   | chr1  | 207966863 | 207968861 |
| SMG | NM_001257389 | CD63   | chr12 | 56119226  | 56119410  |
| SMG | NM_001257389 | CD63   | chr12 | 56119596  | 56119680  |
| SMG | NM_001257389 | CD63   | chr12 | 56119904  | 56120045  |
| SMG | NM_001257389 | CD63   | chr12 | 56120483  | 56120579  |
| SMG | NM_001257389 | CD63   | chr12 | 56120673  | 56120748  |
| SMG | NM_001257389 | CD63   | chr12 | 56120934  | 56121123  |
| SMG | NM_001257389 | CD63   | chr12 | 56122059  | 56122136  |
| SMG | NM_001257389 | CD63   | chr12 | 56123065  | 56123457  |
| SMG | NM_012072    | CD93   | chr20 | 23059992  | 23064611  |
| SMG | NM_012072    | CD93   | chr20 | 23064895  | 23066977  |
| LIT | NM_001790    | CDC25C | chr5  | 137620958 | 137621530 |
| LIT | NM_001790    | CDC25C | chr5  | 137621710 | 137621822 |
| LIT | NM_001790    | CDC25C | chr5  | 137622185 | 137622319 |
| LIT | NM_001790    | CDC25C | chr5  | 137622857 | 137622956 |
| LIT | NM_001790    | CDC25C | chr5  | 137625189 | 137625252 |
| LIT | NM_001790    | CDC25C | chr5  | 137626327 | 137626429 |
| LIT | NM_001790    | CDC25C | chr5  | 137627658 | 137627805 |
| LIT | NM_001790    | CDC25C | chr5  | 137654907 | 137655063 |
| LIT | NM_001790    | CDC25C | chr5  | 137661503 | 137661593 |
| LIT | NM_001790    | CDC25C | chr5  | 137661709 | 137661743 |
| LIT | NM_001790    | CDC25C | chr5  | 137664172 | 137664218 |
| LIT | NM_001790    | CDC25C | chr5  | 137665241 | 137665336 |
| LIT | NM_001790    | CDC25C | chr5  | 137666675 | 137666907 |
| LIT | NM_001790    | CDC25C | chr5  | 137667283 | 137667516 |
| SMG | NM_001114091 | CDC27  | chr17 | 45195310  | 45198383  |
| SMG | NM_001114091 | CDC27  | chr17 | 45199809  | 45199966  |
| SMG | NM_001114091 | CDC27  | chr17 | 45201251  | 45201326  |
| SMG | NM_001114091 | CDC27  | chr17 | 45206758  | 45206887  |
| SMG | NM_001114091 | CDC27  | chr17 | 45209622  | 45209740  |
| SMG | NM_001114091 | CDC27  | chr17 | 45214517  | 45214726  |
| SMG | NM_001114091 | CDC27  | chr17 | 45216104  | 45216257  |

|     |              |          |       |           |           |
|-----|--------------|----------|-------|-----------|-----------|
| SMG | NM_001114091 | CDC27    | chr17 | 45219218  | 45219391  |
| SMG | NM_001114091 | CDC27    | chr17 | 45219594  | 45219802  |
| SMG | NM_001114091 | CDC27    | chr17 | 45221248  | 45221348  |
| SMG | NM_001114091 | CDC27    | chr17 | 45229171  | 45229302  |
| SMG | NM_001114091 | CDC27    | chr17 | 45232037  | 45232152  |
| SMG | NM_001114091 | CDC27    | chr17 | 45234278  | 45234490  |
| SMG | NM_001114091 | CDC27    | chr17 | 45234595  | 45234750  |
| SMG | NM_001114091 | CDC27    | chr17 | 45235571  | 45235669  |
| SMG | NM_001114091 | CDC27    | chr17 | 45247282  | 45247408  |
| SMG | NM_001114091 | CDC27    | chr17 | 45249282  | 45249430  |
| SMG | NM_001114091 | CDC27    | chr17 | 45258927  | 45259003  |
| SMG | NM_001114091 | CDC27    | chr17 | 45266511  | 45266665  |
| SMG | NM_006035    | CDC42BPB | chr14 | 103398715 | 103400180 |
| SMG | NM_006035    | CDC42BPB | chr14 | 103404440 | 103404511 |
| SMG | NM_006035    | CDC42BPB | chr14 | 103404642 | 103404748 |
| SMG | NM_006035    | CDC42BPB | chr14 | 103405946 | 103406064 |
| SMG | NM_006035    | CDC42BPB | chr14 | 103406166 | 103406284 |
| SMG | NM_006035    | CDC42BPB | chr14 | 103406382 | 103406467 |
| SMG | NM_006035    | CDC42BPB | chr14 | 103406563 | 103406661 |
| SMG | NM_006035    | CDC42BPB | chr14 | 103410227 | 103410824 |
| SMG | NM_006035    | CDC42BPB | chr14 | 103411998 | 103412061 |
| SMG | NM_006035    | CDC42BPB | chr14 | 103412804 | 103413021 |
| SMG | NM_006035    | CDC42BPB | chr14 | 103414057 | 103414139 |
| SMG | NM_006035    | CDC42BPB | chr14 | 103416101 | 103416241 |
| SMG | NM_006035    | CDC42BPB | chr14 | 103416802 | 103416939 |
| SMG | NM_006035    | CDC42BPB | chr14 | 103418834 | 103418940 |
| SMG | NM_006035    | CDC42BPB | chr14 | 103420534 | 103420612 |
| SMG | NM_006035    | CDC42BPB | chr14 | 103420938 | 103421025 |
| SMG | NM_006035    | CDC42BPB | chr14 | 103425967 | 103426047 |
| SMG | NM_006035    | CDC42BPB | chr14 | 103429397 | 103429492 |
| SMG | NM_006035    | CDC42BPB | chr14 | 103430838 | 103430987 |
| SMG | NM_006035    | CDC42BPB | chr14 | 103432618 | 103432724 |
| SMG | NM_006035    | CDC42BPB | chr14 | 103433382 | 103433507 |
| SMG | NM_006035    | CDC42BPB | chr14 | 103434589 | 103434695 |
| SMG | NM_006035    | CDC42BPB | chr14 | 103434808 | 103435053 |
| SMG | NM_006035    | CDC42BPB | chr14 | 103436487 | 103436598 |
| SMG | NM_006035    | CDC42BPB | chr14 | 103438255 | 103438498 |
| SMG | NM_006035    | CDC42BPB | chr14 | 103440352 | 103440486 |
| SMG | NM_006035    | CDC42BPB | chr14 | 103442020 | 103442140 |
| SMG | NM_006035    | CDC42BPB | chr14 | 103442219 | 103442386 |
| SMG | NM_006035    | CDC42BPB | chr14 | 103444462 | 103444542 |
| SMG | NM_006035    | CDC42BPB | chr14 | 103447109 | 103447358 |
| SMG | NM_006035    | CDC42BPB | chr14 | 103449892 | 103450093 |

|     |              |          |       |           |           |
|-----|--------------|----------|-------|-----------|-----------|
| SMG | NM_006035    | CDC42BPB | chr14 | 103452823 | 103452917 |
| SMG | NM_006035    | CDC42BPB | chr14 | 103465901 | 103466050 |
| SMG | NM_006035    | CDC42BPB | chr14 | 103470264 | 103470360 |
| SMG | NM_006035    | CDC42BPB | chr14 | 103474808 | 103474892 |
| SMG | NM_006035    | CDC42BPB | chr14 | 103478433 | 103478525 |
| SMG | NM_006035    | CDC42BPB | chr14 | 103523335 | 103523742 |
| LIT | NM_004360    | CDH1     | chr16 | 68771194  | 68771366  |
| LIT | NM_004360    | CDH1     | chr16 | 68772199  | 68772314  |
| LIT | NM_004360    | CDH1     | chr16 | 68835572  | 68835796  |
| LIT | NM_004360    | CDH1     | chr16 | 68842326  | 68842470  |
| LIT | NM_004360    | CDH1     | chr16 | 68842595  | 68842751  |
| LIT | NM_004360    | CDH1     | chr16 | 68844099  | 68844244  |
| LIT | NM_004360    | CDH1     | chr16 | 68845586  | 68845762  |
| LIT | NM_004360    | CDH1     | chr16 | 68846037  | 68846166  |
| LIT | NM_004360    | CDH1     | chr16 | 68847215  | 68847398  |
| LIT | NM_004360    | CDH1     | chr16 | 68849417  | 68849662  |
| LIT | NM_004360    | CDH1     | chr16 | 68853182  | 68853328  |
| LIT | NM_004360    | CDH1     | chr16 | 68855903  | 68856128  |
| LIT | NM_004360    | CDH1     | chr16 | 68857301  | 68857529  |
| LIT | NM_004360    | CDH1     | chr16 | 68862076  | 68862207  |
| LIT | NM_004360    | CDH1     | chr16 | 68863556  | 68863700  |
| LIT | NM_004360    | CDH1     | chr16 | 68867192  | 68869444  |
| CNV | NM_004932    | CDH6     | chr5  | 31193761  | 31193993  |
| CNV | NM_004932    | CDH6     | chr5  | 31267452  | 31267808  |
| CNV | NM_004932    | CDH6     | chr5  | 31294068  | 31294363  |
| CNV | NM_004932    | CDH6     | chr5  | 31297395  | 31297515  |
| CNV | NM_004932    | CDH6     | chr5  | 31299570  | 31299738  |
| CNV | NM_004932    | CDH6     | chr5  | 31302217  | 31302405  |
| CNV | NM_004932    | CDH6     | chr5  | 31305280  | 31305534  |
| CNV | NM_004932    | CDH6     | chr5  | 31313424  | 31313561  |
| CNV | NM_004932    | CDH6     | chr5  | 31316314  | 31316436  |
| CNV | NM_004932    | CDH6     | chr5  | 31317481  | 31317599  |
| CNV | NM_004932    | CDH6     | chr5  | 31317779  | 31318031  |
| CNV | NM_004932    | CDH6     | chr5  | 31322924  | 31329253  |
| SMG | NM_207327    | CDPF1    | chr22 | 46639909  | 46641135  |
| SMG | NM_207327    | CDPF1    | chr22 | 46643006  | 46643118  |
| SMG | NM_207327    | CDPF1    | chr22 | 46644068  | 46644181  |
| SMG | NM_207327    | CDPF1    | chr22 | 46646152  | 46646193  |
| LIT | NM_001265    | CDX2     | chr13 | 28536204  | 28537506  |
| LIT | NM_001265    | CDX2     | chr13 | 28539006  | 28539152  |
| LIT | NM_001265    | CDX2     | chr13 | 28542602  | 28543505  |
| SMG | NM_001102597 | CEACAM20 | chr19 | 45010210  | 45010266  |
| SMG | NM_001102597 | CEACAM20 | chr19 | 45015087  | 45015213  |

|     |              |          |       |          |          |
|-----|--------------|----------|-------|----------|----------|
| SMG | NM_001102597 | CEACAM20 | chr19 | 45015694 | 45015730 |
| SMG | NM_001102597 | CEACAM20 | chr19 | 45016074 | 45016136 |
| SMG | NM_001102597 | CEACAM20 | chr19 | 45016925 | 45016991 |
| SMG | NM_001102597 | CEACAM20 | chr19 | 45016992 | 45017012 |
| SMG | NM_001102597 | CEACAM20 | chr19 | 45017230 | 45017348 |
| SMG | NM_001102597 | CEACAM20 | chr19 | 45021006 | 45021285 |
| SMG | NM_001102597 | CEACAM20 | chr19 | 45024507 | 45024786 |
| SMG | NM_001102597 | CEACAM20 | chr19 | 45026662 | 45026941 |
| SMG | NM_001102597 | CEACAM20 | chr19 | 45028018 | 45028294 |
| SMG | NM_001102597 | CEACAM20 | chr19 | 45029133 | 45029277 |
| SMG | NM_001102597 | CEACAM20 | chr19 | 45033480 | 45033548 |
| LIT | NM_004363    | CEACAM5  | chr19 | 42212529 | 42212714 |
| LIT | NM_004363    | CEACAM5  | chr19 | 42213598 | 42213958 |
| LIT | NM_004363    | CEACAM5  | chr19 | 42218889 | 42219168 |
| LIT | NM_004363    | CEACAM5  | chr19 | 42219568 | 42219823 |
| LIT | NM_004363    | CEACAM5  | chr19 | 42221373 | 42221652 |
| LIT | NM_004363    | CEACAM5  | chr19 | 42222046 | 42222301 |
| LIT | NM_004363    | CEACAM5  | chr19 | 42223848 | 42224127 |
| LIT | NM_004363    | CEACAM5  | chr19 | 42224841 | 42225096 |
| LIT | NM_004363    | CEACAM5  | chr19 | 42231153 | 42231272 |
| LIT | NM_004363    | CEACAM5  | chr19 | 42233103 | 42234437 |
| LIT | NM_005760    | CEBPZ    | chr2  | 37428774 | 37429046 |
| LIT | NM_005760    | CEBPZ    | chr2  | 37429926 | 37430008 |
| LIT | NM_005760    | CEBPZ    | chr2  | 37430092 | 37430151 |
| LIT | NM_005760    | CEBPZ    | chr2  | 37438141 | 37438225 |
| LIT | NM_005760    | CEBPZ    | chr2  | 37438985 | 37439182 |
| LIT | NM_005760    | CEBPZ    | chr2  | 37439477 | 37439535 |
| LIT | NM_005760    | CEBPZ    | chr2  | 37441006 | 37441104 |
| LIT | NM_005760    | CEBPZ    | chr2  | 37442028 | 37442095 |
| LIT | NM_005760    | CEBPZ    | chr2  | 37443282 | 37443351 |
| LIT | NM_005760    | CEBPZ    | chr2  | 37443458 | 37443561 |
| LIT | NM_005760    | CEBPZ    | chr2  | 37444126 | 37444180 |
| LIT | NM_005760    | CEBPZ    | chr2  | 37447527 | 37447616 |
| LIT | NM_005760    | CEBPZ    | chr2  | 37449522 | 37449706 |
| LIT | NM_005760    | CEBPZ    | chr2  | 37450312 | 37450544 |
| LIT | NM_005760    | CEBPZ    | chr2  | 37454686 | 37456179 |
| LIT | NM_005760    | CEBPZ    | chr2  | 37458554 | 37458740 |
| SMG | NM_001971    | CELA1    | chr12 | 51722226 | 51722378 |
| SMG | NM_001971    | CELA1    | chr12 | 51723467 | 51723617 |
| SMG | NM_001971    | CELA1    | chr12 | 51733643 | 51733789 |
| SMG | NM_001971    | CELA1    | chr12 | 51735027 | 51735164 |
| SMG | NM_001971    | CELA1    | chr12 | 51736358 | 51736484 |
| SMG | NM_001971    | CELA1    | chr12 | 51737536 | 51737637 |



|     |           |       |       |           |           |
|-----|-----------|-------|-------|-----------|-----------|
| SMG | NM_001971 | CELA1 | chr12 | 51739578  | 51739661  |
| SMG | NM_001971 | CELA1 | chr12 | 51740406  | 51740463  |
| CNV | NM_032816 | CEP89 | chr19 | 33369903  | 33370284  |
| CNV | NM_032816 | CEP89 | chr19 | 33372749  | 33372919  |
| CNV | NM_032816 | CEP89 | chr19 | 33378657  | 33378747  |
| CNV | NM_032816 | CEP89 | chr19 | 33390762  | 33390904  |
| CNV | NM_032816 | CEP89 | chr19 | 33392150  | 33392318  |
| CNV | NM_032816 | CEP89 | chr19 | 33406242  | 33406423  |
| CNV | NM_032816 | CEP89 | chr19 | 33409129  | 33409245  |
| CNV | NM_032816 | CEP89 | chr19 | 33414344  | 33414448  |
| CNV | NM_032816 | CEP89 | chr19 | 33417095  | 33417179  |
| CNV | NM_032816 | CEP89 | chr19 | 33417839  | 33417890  |
| CNV | NM_032816 | CEP89 | chr19 | 33422334  | 33422477  |
| CNV | NM_032816 | CEP89 | chr19 | 33424356  | 33424575  |
| CNV | NM_032816 | CEP89 | chr19 | 33428536  | 33428579  |
| CNV | NM_032816 | CEP89 | chr19 | 33430762  | 33430791  |
| CNV | NM_032816 | CEP89 | chr19 | 33439171  | 33439274  |
| CNV | NM_032816 | CEP89 | chr19 | 33444520  | 33444707  |
| CNV | NM_032816 | CEP89 | chr19 | 33450805  | 33450964  |
| CNV | NM_032816 | CEP89 | chr19 | 33457265  | 33457372  |
| CNV | NM_032816 | CEP89 | chr19 | 33462741  | 33462869  |
| SMG | NM_178842 | CERS3 | chr15 | 100940599 | 100943070 |
| SMG | NM_178842 | CERS3 | chr15 | 100996097 | 100996251 |
| SMG | NM_178842 | CERS3 | chr15 | 101009582 | 101009689 |
| SMG | NM_178842 | CERS3 | chr15 | 101013128 | 101013257 |
| SMG | NM_178842 | CERS3 | chr15 | 101016290 | 101016383 |
| SMG | NM_178842 | CERS3 | chr15 | 101019632 | 101019683 |
| SMG | NM_178842 | CERS3 | chr15 | 101020193 | 101020251 |
| SMG | NM_178842 | CERS3 | chr15 | 101024754 | 101024873 |
| SMG | NM_178842 | CERS3 | chr15 | 101031021 | 101031136 |
| SMG | NM_178842 | CERS3 | chr15 | 101041881 | 101042055 |
| SMG | NM_178842 | CERS3 | chr15 | 101061871 | 101061961 |
| SMG | NM_178842 | CERS3 | chr15 | 101069017 | 101069280 |
| SMG | NM_178842 | CERS3 | chr15 | 101084855 | 101084925 |
| CNV | NM_001270 | CHD1  | chr5  | 98190907  | 98192429  |
| CNV | NM_001270 | CHD1  | chr5  | 98193883  | 98194094  |
| CNV | NM_001270 | CHD1  | chr5  | 98194667  | 98194719  |
| CNV | NM_001270 | CHD1  | chr5  | 98195675  | 98195772  |
| CNV | NM_001270 | CHD1  | chr5  | 98199111  | 98199290  |
| CNV | NM_001270 | CHD1  | chr5  | 98204198  | 98204339  |
| CNV | NM_001270 | CHD1  | chr5  | 98205457  | 98205586  |
| CNV | NM_001270 | CHD1  | chr5  | 98206390  | 98206507  |
| CNV | NM_001270 | CHD1  | chr5  | 98207754  | 98207905  |

|     |           |      |       |          |          |
|-----|-----------|------|-------|----------|----------|
| CNV | NM_001270 | CHD1 | chr5  | 98208120 | 98208259 |
| CNV | NM_001270 | CHD1 | chr5  | 98209296 | 98209427 |
| CNV | NM_001270 | CHD1 | chr5  | 98210775 | 98210817 |
| CNV | NM_001270 | CHD1 | chr5  | 98212101 | 98212262 |
| CNV | NM_001270 | CHD1 | chr5  | 98215255 | 98215432 |
| CNV | NM_001270 | CHD1 | chr5  | 98216779 | 98216875 |
| CNV | NM_001270 | CHD1 | chr5  | 98216982 | 98217079 |
| CNV | NM_001270 | CHD1 | chr5  | 98217678 | 98217827 |
| CNV | NM_001270 | CHD1 | chr5  | 98218791 | 98218941 |
| CNV | NM_001270 | CHD1 | chr5  | 98221281 | 98221353 |
| CNV | NM_001270 | CHD1 | chr5  | 98223791 | 98223944 |
| CNV | NM_001270 | CHD1 | chr5  | 98224779 | 98224942 |
| CNV | NM_001270 | CHD1 | chr5  | 98228228 | 98228417 |
| CNV | NM_001270 | CHD1 | chr5  | 98229119 | 98229310 |
| CNV | NM_001270 | CHD1 | chr5  | 98230300 | 98230390 |
| CNV | NM_001270 | CHD1 | chr5  | 98231929 | 98232146 |
| CNV | NM_001270 | CHD1 | chr5  | 98232896 | 98233024 |
| CNV | NM_001270 | CHD1 | chr5  | 98233959 | 98234138 |
| CNV | NM_001270 | CHD1 | chr5  | 98234367 | 98234468 |
| CNV | NM_001270 | CHD1 | chr5  | 98235183 | 98235409 |
| CNV | NM_001270 | CHD1 | chr5  | 98236514 | 98236786 |
| CNV | NM_001270 | CHD1 | chr5  | 98236889 | 98237039 |
| CNV | NM_001270 | CHD1 | chr5  | 98238603 | 98238668 |
| CNV | NM_001270 | CHD1 | chr5  | 98239495 | 98239612 |
| CNV | NM_001270 | CHD1 | chr5  | 98240600 | 98240802 |
| CNV | NM_001270 | CHD1 | chr5  | 98262037 | 98262238 |
| SMG | NM_001273 | CHD4 | chr12 | 6679247  | 6679859  |
| SMG | NM_001273 | CHD4 | chr12 | 6680034  | 6680198  |
| SMG | NM_001273 | CHD4 | chr12 | 6682239  | 6682435  |
| SMG | NM_001273 | CHD4 | chr12 | 6686950  | 6687083  |
| SMG | NM_001273 | CHD4 | chr12 | 6687194  | 6687303  |
| SMG | NM_001273 | CHD4 | chr12 | 6687574  | 6687712  |
| SMG | NM_001273 | CHD4 | chr12 | 6688011  | 6688083  |
| SMG | NM_001273 | CHD4 | chr12 | 6690209  | 6690339  |
| SMG | NM_001273 | CHD4 | chr12 | 6690456  | 6690554  |
| SMG | NM_001273 | CHD4 | chr12 | 6690814  | 6690980  |
| SMG | NM_001273 | CHD4 | chr12 | 6691302  | 6691447  |
| SMG | NM_001273 | CHD4 | chr12 | 6691780  | 6691914  |
| SMG | NM_001273 | CHD4 | chr12 | 6692013  | 6692102  |
| SMG | NM_001273 | CHD4 | chr12 | 6692192  | 6692279  |
| SMG | NM_001273 | CHD4 | chr12 | 6692363  | 6692544  |
| SMG | NM_001273 | CHD4 | chr12 | 6696549  | 6696725  |
| SMG | NM_001273 | CHD4 | chr12 | 6696877  | 6697115  |

|     |           |      |       |          |          |
|-----|-----------|------|-------|----------|----------|
| SMG | NM_001273 | CHD4 | chr12 | 6697463  | 6697588  |
| SMG | NM_001273 | CHD4 | chr12 | 6700631  | 6700749  |
| SMG | NM_001273 | CHD4 | chr12 | 6700859  | 6700991  |
| SMG | NM_001273 | CHD4 | chr12 | 6701081  | 6701223  |
| SMG | NM_001273 | CHD4 | chr12 | 6701558  | 6701732  |
| SMG | NM_001273 | CHD4 | chr12 | 6701861  | 6701983  |
| SMG | NM_001273 | CHD4 | chr12 | 6702256  | 6702394  |
| SMG | NM_001273 | CHD4 | chr12 | 6702581  | 6702782  |
| SMG | NM_001273 | CHD4 | chr12 | 6703624  | 6703816  |
| SMG | NM_001273 | CHD4 | chr12 | 6704499  | 6704596  |
| SMG | NM_001273 | CHD4 | chr12 | 6705171  | 6705303  |
| SMG | NM_001273 | CHD4 | chr12 | 6707059  | 6707265  |
| SMG | NM_001273 | CHD4 | chr12 | 6707387  | 6707591  |
| SMG | NM_001273 | CHD4 | chr12 | 6708938  | 6709178  |
| SMG | NM_001273 | CHD4 | chr12 | 6709382  | 6709561  |
| SMG | NM_001273 | CHD4 | chr12 | 6709699  | 6709835  |
| SMG | NM_001273 | CHD4 | chr12 | 6710091  | 6710219  |
| SMG | NM_001273 | CHD4 | chr12 | 6710454  | 6710696  |
| SMG | NM_001273 | CHD4 | chr12 | 6710813  | 6710932  |
| SMG | NM_001273 | CHD4 | chr12 | 6711125  | 6711341  |
| SMG | NM_001273 | CHD4 | chr12 | 6711541  | 6711663  |
| SMG | NM_001273 | CHD4 | chr12 | 6715439  | 6715617  |
| SMG | NM_001273 | CHD4 | chr12 | 6716465  | 6716551  |
| CNV | NM_032221 | CHD6 | chr20 | 40030742 | 40034129 |
| CNV | NM_032221 | CHD6 | chr20 | 40040783 | 40040903 |
| CNV | NM_032221 | CHD6 | chr20 | 40041963 | 40042155 |
| CNV | NM_032221 | CHD6 | chr20 | 40043825 | 40044278 |
| CNV | NM_032221 | CHD6 | chr20 | 40045227 | 40045434 |
| CNV | NM_032221 | CHD6 | chr20 | 40045837 | 40045989 |
| CNV | NM_032221 | CHD6 | chr20 | 40049147 | 40050719 |
| CNV | NM_032221 | CHD6 | chr20 | 40052131 | 40052340 |
| CNV | NM_032221 | CHD6 | chr20 | 40053817 | 40054034 |
| CNV | NM_032221 | CHD6 | chr20 | 40054732 | 40054793 |
| CNV | NM_032221 | CHD6 | chr20 | 40065913 | 40065974 |
| CNV | NM_032221 | CHD6 | chr20 | 40068639 | 40068769 |
| CNV | NM_032221 | CHD6 | chr20 | 40074304 | 40074408 |
| CNV | NM_032221 | CHD6 | chr20 | 40076521 | 40076611 |
| CNV | NM_032221 | CHD6 | chr20 | 40079585 | 40079745 |
| CNV | NM_032221 | CHD6 | chr20 | 40080465 | 40080665 |
| CNV | NM_032221 | CHD6 | chr20 | 40081379 | 40081582 |
| CNV | NM_032221 | CHD6 | chr20 | 40083265 | 40083376 |
| CNV | NM_032221 | CHD6 | chr20 | 40084439 | 40084619 |
| CNV | NM_032221 | CHD6 | chr20 | 40085903 | 40086068 |

|     |           |      |       |          |          |
|-----|-----------|------|-------|----------|----------|
| CNV | NM_032221 | CHD6 | chr20 | 40101961 | 40102157 |
| CNV | NM_032221 | CHD6 | chr20 | 40111948 | 40112159 |
| CNV | NM_032221 | CHD6 | chr20 | 40112991 | 40113247 |
| CNV | NM_032221 | CHD6 | chr20 | 40116304 | 40116448 |
| CNV | NM_032221 | CHD6 | chr20 | 40117067 | 40117244 |
| CNV | NM_032221 | CHD6 | chr20 | 40118417 | 40118661 |
| CNV | NM_032221 | CHD6 | chr20 | 40120337 | 40120459 |
| CNV | NM_032221 | CHD6 | chr20 | 40122177 | 40122312 |
| CNV | NM_032221 | CHD6 | chr20 | 40122497 | 40122584 |
| CNV | NM_032221 | CHD6 | chr20 | 40126023 | 40126141 |
| CNV | NM_032221 | CHD6 | chr20 | 40126807 | 40126866 |
| CNV | NM_032221 | CHD6 | chr20 | 40127934 | 40127997 |
| CNV | NM_032221 | CHD6 | chr20 | 40141484 | 40141634 |
| CNV | NM_032221 | CHD6 | chr20 | 40143443 | 40143591 |
| CNV | NM_032221 | CHD6 | chr20 | 40161688 | 40162209 |
| CNV | NM_032221 | CHD6 | chr20 | 40179943 | 40179999 |
| CNV | NM_032221 | CHD6 | chr20 | 40246978 | 40247133 |
| CNV | NM_017780 | CHD7 | chr8  | 61591323 | 61591641 |
| CNV | NM_017780 | CHD7 | chr8  | 61653817 | 61655656 |
| CNV | NM_017780 | CHD7 | chr8  | 61693558 | 61693989 |
| CNV | NM_017780 | CHD7 | chr8  | 61707544 | 61707686 |
| CNV | NM_017780 | CHD7 | chr8  | 61712946 | 61713084 |
| CNV | NM_017780 | CHD7 | chr8  | 61714086 | 61714152 |
| CNV | NM_017780 | CHD7 | chr8  | 61720775 | 61720831 |
| CNV | NM_017780 | CHD7 | chr8  | 61728945 | 61729060 |
| CNV | NM_017780 | CHD7 | chr8  | 61732565 | 61732649 |
| CNV | NM_017780 | CHD7 | chr8  | 61734348 | 61734486 |
| CNV | NM_017780 | CHD7 | chr8  | 61734582 | 61734704 |
| CNV | NM_017780 | CHD7 | chr8  | 61735061 | 61735305 |
| CNV | NM_017780 | CHD7 | chr8  | 61736398 | 61736575 |
| CNV | NM_017780 | CHD7 | chr8  | 61741221 | 61741365 |
| CNV | NM_017780 | CHD7 | chr8  | 61742880 | 61743136 |
| CNV | NM_017780 | CHD7 | chr8  | 61748631 | 61748842 |
| CNV | NM_017780 | CHD7 | chr8  | 61749375 | 61749571 |
| CNV | NM_017780 | CHD7 | chr8  | 61750226 | 61750394 |
| CNV | NM_017780 | CHD7 | chr8  | 61750634 | 61750814 |
| CNV | NM_017780 | CHD7 | chr8  | 61754202 | 61754313 |
| CNV | NM_017780 | CHD7 | chr8  | 61754405 | 61754611 |
| CNV | NM_017780 | CHD7 | chr8  | 61757422 | 61757622 |
| CNV | NM_017780 | CHD7 | chr8  | 61757808 | 61757968 |
| CNV | NM_017780 | CHD7 | chr8  | 61761073 | 61761163 |
| CNV | NM_017780 | CHD7 | chr8  | 61761609 | 61761713 |
| CNV | NM_017780 | CHD7 | chr8  | 61763051 | 61763181 |

|     |              |       |       |           |           |
|-----|--------------|-------|-------|-----------|-----------|
| CNV | NM_017780    | CHD7  | chr8  | 61763590  | 61763663  |
| CNV | NM_017780    | CHD7  | chr8  | 61763820  | 61763878  |
| CNV | NM_017780    | CHD7  | chr8  | 61764577  | 61764806  |
| CNV | NM_017780    | CHD7  | chr8  | 61765056  | 61765265  |
| CNV | NM_017780    | CHD7  | chr8  | 61765387  | 61766059  |
| CNV | NM_017780    | CHD7  | chr8  | 61766921  | 61767082  |
| CNV | NM_017780    | CHD7  | chr8  | 61768533  | 61768761  |
| CNV | NM_017780    | CHD7  | chr8  | 61769003  | 61769447  |
| CNV | NM_017780    | CHD7  | chr8  | 61773462  | 61773684  |
| CNV | NM_017780    | CHD7  | chr8  | 61774754  | 61774895  |
| CNV | NM_017780    | CHD7  | chr8  | 61775106  | 61775211  |
| CNV | NM_017780    | CHD7  | chr8  | 61777574  | 61780586  |
| LIT | NM_001114121 | CHEK1 | chr11 | 125495030 | 125495907 |
| LIT | NM_001114121 | CHEK1 | chr11 | 125496643 | 125496728 |
| LIT | NM_001114121 | CHEK1 | chr11 | 125497501 | 125497725 |
| LIT | NM_001114121 | CHEK1 | chr11 | 125499126 | 125499191 |
| LIT | NM_001114121 | CHEK1 | chr11 | 125499285 | 125499355 |
| LIT | NM_001114121 | CHEK1 | chr11 | 125503057 | 125503246 |
| LIT | NM_001114121 | CHEK1 | chr11 | 125505323 | 125505428 |
| LIT | NM_001114121 | CHEK1 | chr11 | 125507343 | 125507439 |
| LIT | NM_001114121 | CHEK1 | chr11 | 125513686 | 125513795 |
| LIT | NM_001114121 | CHEK1 | chr11 | 125513985 | 125514163 |
| LIT | NM_001114121 | CHEK1 | chr11 | 125514406 | 125514538 |
| LIT | NM_001114121 | CHEK1 | chr11 | 125523640 | 125523742 |
| LIT | NM_001114121 | CHEK1 | chr11 | 125525119 | 125525242 |
| LIT | NM_001114121 | CHEK1 | chr11 | 125545822 | 125546150 |
| LIT | NM_001253387 | CHL1  | chr3  | 238278    | 238746    |
| LIT | NM_001253387 | CHL1  | chr3  | 286295    | 286375    |
| LIT | NM_001253387 | CHL1  | chr3  | 361365    | 361550    |
| LIT | NM_001253387 | CHL1  | chr3  | 367641    | 367747    |
| LIT | NM_001253387 | CHL1  | chr3  | 369849    | 370037    |
| LIT | NM_001253387 | CHL1  | chr3  | 382476    | 382599    |
| LIT | NM_001253387 | CHL1  | chr3  | 383594    | 383765    |
| LIT | NM_001253387 | CHL1  | chr3  | 386271    | 386392    |
| LIT | NM_001253387 | CHL1  | chr3  | 391041    | 391226    |
| LIT | NM_001253387 | CHL1  | chr3  | 396322    | 396454    |
| LIT | NM_001253387 | CHL1  | chr3  | 401966    | 402107    |
| LIT | NM_001253387 | CHL1  | chr3  | 403381    | 403493    |
| LIT | NM_001253387 | CHL1  | chr3  | 404899    | 405066    |
| LIT | NM_001253387 | CHL1  | chr3  | 407632    | 407798    |
| LIT | NM_001253387 | CHL1  | chr3  | 419500    | 419625    |
| LIT | NM_001253387 | CHL1  | chr3  | 423861    | 423963    |
| LIT | NM_001253387 | CHL1  | chr3  | 424156    | 424354    |

|     |              |         |       |          |          |
|-----|--------------|---------|-------|----------|----------|
| LIT | NM_001253387 | CHL1    | chr3  | 425498   | 425569   |
| LIT | NM_001253387 | CHL1    | chr3  | 430934   | 431157   |
| LIT | NM_001253387 | CHL1    | chr3  | 432383   | 432499   |
| LIT | NM_001253387 | CHL1    | chr3  | 432637   | 432842   |
| LIT | NM_001253387 | CHL1    | chr3  | 433357   | 433480   |
| LIT | NM_001253387 | CHL1    | chr3  | 436375   | 436555   |
| LIT | NM_001253387 | CHL1    | chr3  | 439909   | 440068   |
| LIT | NM_001253387 | CHL1    | chr3  | 440699   | 440831   |
| LIT | NM_001253387 | CHL1    | chr3  | 443308   | 443381   |
| LIT | NM_001253387 | CHL1    | chr3  | 447177   | 451097   |
| CNV | NM_001204177 | CHODL   | chr21 | 19289656 | 19289717 |
| CNV | NM_001204177 | CHODL   | chr21 | 19628825 | 19629135 |
| CNV | NM_001204177 | CHODL   | chr21 | 19629286 | 19629444 |
| CNV | NM_001204177 | CHODL   | chr21 | 19632516 | 19632603 |
| CNV | NM_001204177 | CHODL   | chr21 | 19638270 | 19639687 |
| SMG | NM_005769    | CHST4   | chr16 | 71560022 | 71560215 |
| SMG | NM_005769    | CHST4   | chr16 | 71570562 | 71572493 |
| SMG | NM_173619    | CLEC18C | chr16 | 70207927 | 70208305 |
| SMG | NM_173619    | CLEC18C | chr16 | 70208849 | 70208941 |
| SMG | NM_173619    | CLEC18C | chr16 | 70211143 | 70211383 |
| SMG | NM_173619    | CLEC18C | chr16 | 70215752 | 70215850 |
| SMG | NM_173619    | CLEC18C | chr16 | 70216270 | 70216392 |
| SMG | NM_173619    | CLEC18C | chr16 | 70216549 | 70216657 |
| SMG | NM_173619    | CLEC18C | chr16 | 70217183 | 70217276 |
| SMG | NM_173619    | CLEC18C | chr16 | 70217655 | 70217762 |
| SMG | NM_173619    | CLEC18C | chr16 | 70218396 | 70218526 |
| SMG | NM_173619    | CLEC18C | chr16 | 70218798 | 70218895 |
| SMG | NM_173619    | CLEC18C | chr16 | 70219787 | 70219879 |
| SMG | NM_173619    | CLEC18C | chr16 | 70220385 | 70220798 |
| SMG | NM_130441    | CLEC4C  | chr12 | 7882010  | 7882336  |
| SMG | NM_130441    | CLEC4C  | chr12 | 7883392  | 7883508  |
| SMG | NM_130441    | CLEC4C  | chr12 | 7890024  | 7890170  |
| SMG | NM_130441    | CLEC4C  | chr12 | 7894016  | 7894127  |
| SMG | NM_130441    | CLEC4C  | chr12 | 7898926  | 7899019  |
| SMG | NM_130441    | CLEC4C  | chr12 | 7899913  | 7900074  |
| SMG | NM_130441    | CLEC4C  | chr12 | 7901708  | 7902069  |
| SMG | NM_173538    | CNBD1   | chr8  | 87878675 | 87878811 |
| SMG | NM_173538    | CNBD1   | chr8  | 87899769 | 87899839 |
| SMG | NM_173538    | CNBD1   | chr8  | 87917308 | 87917422 |
| SMG | NM_173538    | CNBD1   | chr8  | 87951823 | 87951982 |
| SMG | NM_173538    | CNBD1   | chr8  | 88218220 | 88218366 |
| SMG | NM_173538    | CNBD1   | chr8  | 88249146 | 88249340 |
| SMG | NM_173538    | CNBD1   | chr8  | 88296905 | 88297043 |

|     |              |       |      |          |          |
|-----|--------------|-------|------|----------|----------|
| SMG | NM_173538    | CNBD1 | chr8 | 88298766 | 88298899 |
| SMG | NM_173538    | CNBD1 | chr8 | 88363912 | 88364022 |
| SMG | NM_173538    | CNBD1 | chr8 | 88365863 | 88366014 |
| SMG | NM_173538    | CNBD1 | chr8 | 88394847 | 88394955 |
| LIT | NM_001206955 | CNTN4 | chr3 | 2280512  | 2280752  |
| LIT | NM_001206955 | CNTN4 | chr3 | 2380861  | 2380917  |
| LIT | NM_001206955 | CNTN4 | chr3 | 2613099  | 2613242  |
| LIT | NM_001206955 | CNTN4 | chr3 | 2777898  | 2778025  |
| LIT | NM_001206955 | CNTN4 | chr3 | 2787205  | 2787381  |
| LIT | NM_001206955 | CNTN4 | chr3 | 2861169  | 2861265  |
| LIT | NM_001206955 | CNTN4 | chr3 | 2908435  | 2908633  |
| LIT | NM_001206955 | CNTN4 | chr3 | 2924828  | 2924931  |
| LIT | NM_001206955 | CNTN4 | chr3 | 2928723  | 2928908  |
| LIT | NM_001206955 | CNTN4 | chr3 | 2942368  | 2942505  |
| LIT | NM_001206955 | CNTN4 | chr3 | 2944559  | 2944689  |
| LIT | NM_001206955 | CNTN4 | chr3 | 2967312  | 2967463  |
| LIT | NM_001206955 | CNTN4 | chr3 | 3030028  | 3030156  |
| LIT | NM_001206955 | CNTN4 | chr3 | 3067785  | 3067961  |
| LIT | NM_001206955 | CNTN4 | chr3 | 3072538  | 3072659  |
| LIT | NM_001206955 | CNTN4 | chr3 | 3076315  | 3076474  |
| LIT | NM_001206955 | CNTN4 | chr3 | 3078862  | 3079012  |
| LIT | NM_001206955 | CNTN4 | chr3 | 3080616  | 3080687  |
| LIT | NM_001206955 | CNTN4 | chr3 | 3081720  | 3081955  |
| LIT | NM_001206955 | CNTN4 | chr3 | 3083993  | 3084106  |
| LIT | NM_001206955 | CNTN4 | chr3 | 3084660  | 3084847  |
| LIT | NM_001206955 | CNTN4 | chr3 | 3085275  | 3085388  |
| LIT | NM_001206955 | CNTN4 | chr3 | 3095490  | 3095659  |
| LIT | NM_001206955 | CNTN4 | chr3 | 3097803  | 3099645  |
| CNV | NM_014461    | CNTN6 | chr3 | 1134628  | 1134813  |
| CNV | NM_014461    | CNTN6 | chr3 | 1189610  | 1189747  |
| CNV | NM_014461    | CNTN6 | chr3 | 1262370  | 1262497  |
| CNV | NM_014461    | CNTN6 | chr3 | 1269501  | 1269677  |
| CNV | NM_014461    | CNTN6 | chr3 | 1320096  | 1320192  |
| CNV | NM_014461    | CNTN6 | chr3 | 1337284  | 1337488  |
| CNV | NM_014461    | CNTN6 | chr3 | 1339572  | 1339675  |
| CNV | NM_014461    | CNTN6 | chr3 | 1363333  | 1363518  |
| CNV | NM_014461    | CNTN6 | chr3 | 1367498  | 1367635  |
| CNV | NM_014461    | CNTN6 | chr3 | 1369140  | 1369270  |
| CNV | NM_014461    | CNTN6 | chr3 | 1371468  | 1371619  |
| CNV | NM_014461    | CNTN6 | chr3 | 1394007  | 1394135  |
| CNV | NM_014461    | CNTN6 | chr3 | 1413982  | 1414158  |
| CNV | NM_014461    | CNTN6 | chr3 | 1414521  | 1414639  |
| CNV | NM_014461    | CNTN6 | chr3 | 1415287  | 1415446  |

|     |           |         |      |           |           |
|-----|-----------|---------|------|-----------|-----------|
| CNV | NM_014461 | CNTN6   | chr3 | 1415607   | 1415757   |
| CNV | NM_014461 | CNTN6   | chr3 | 1418688   | 1418759   |
| CNV | NM_014461 | CNTN6   | chr3 | 1424625   | 1424860   |
| CNV | NM_014461 | CNTN6   | chr3 | 1424976   | 1425092   |
| CNV | NM_014461 | CNTN6   | chr3 | 1427294   | 1427481   |
| CNV | NM_014461 | CNTN6   | chr3 | 1443116   | 1443229   |
| CNV | NM_014461 | CNTN6   | chr3 | 1444001   | 1444170   |
| CNV | NM_014461 | CNTN6   | chr3 | 1445001   | 1445278   |
| CNV | NM_130773 | CNTNAP5 | chr2 | 124782863 | 124783309 |
| CNV | NM_130773 | CNTNAP5 | chr2 | 124979281 | 124979386 |
| CNV | NM_130773 | CNTNAP5 | chr2 | 124999776 | 124999970 |
| CNV | NM_130773 | CNTNAP5 | chr2 | 125175019 | 125175167 |
| CNV | NM_130773 | CNTNAP5 | chr2 | 125192060 | 125192264 |
| CNV | NM_130773 | CNTNAP5 | chr2 | 125204329 | 125204514 |
| CNV | NM_130773 | CNTNAP5 | chr2 | 125232315 | 125232456 |
| CNV | NM_130773 | CNTNAP5 | chr2 | 125261868 | 125262133 |
| CNV | NM_130773 | CNTNAP5 | chr2 | 125281879 | 125282029 |
| CNV | NM_130773 | CNTNAP5 | chr2 | 125284861 | 125285033 |
| CNV | NM_130773 | CNTNAP5 | chr2 | 125320793 | 125320900 |
| CNV | NM_130773 | CNTNAP5 | chr2 | 125367377 | 125367497 |
| CNV | NM_130773 | CNTNAP5 | chr2 | 125405334 | 125405535 |
| CNV | NM_130773 | CNTNAP5 | chr2 | 125504805 | 125504962 |
| CNV | NM_130773 | CNTNAP5 | chr2 | 125521248 | 125521376 |
| CNV | NM_130773 | CNTNAP5 | chr2 | 125521553 | 125521724 |
| CNV | NM_130773 | CNTNAP5 | chr2 | 125530375 | 125530594 |
| CNV | NM_130773 | CNTNAP5 | chr2 | 125547478 | 125547718 |
| CNV | NM_130773 | CNTNAP5 | chr2 | 125555672 | 125555897 |
| CNV | NM_130773 | CNTNAP5 | chr2 | 125622882 | 125623013 |
| CNV | NM_130773 | CNTNAP5 | chr2 | 125627251 | 125627339 |
| CNV | NM_130773 | CNTNAP5 | chr2 | 125660458 | 125660677 |
| CNV | NM_130773 | CNTNAP5 | chr2 | 125669043 | 125669115 |
| CNV | NM_130773 | CNTNAP5 | chr2 | 125671668 | 125672954 |
| LIT | NM_021110 | COL14A1 | chr8 | 121137346 | 121137579 |
| LIT | NM_021110 | COL14A1 | chr8 | 121160044 | 121160169 |
| LIT | NM_021110 | COL14A1 | chr8 | 121170368 | 121170485 |
| LIT | NM_021110 | COL14A1 | chr8 | 121174664 | 121174808 |
| LIT | NM_021110 | COL14A1 | chr8 | 121180399 | 121180486 |
| LIT | NM_021110 | COL14A1 | chr8 | 121209029 | 121209185 |
| LIT | NM_021110 | COL14A1 | chr8 | 121210049 | 121210169 |
| LIT | NM_021110 | COL14A1 | chr8 | 121211640 | 121211805 |
| LIT | NM_021110 | COL14A1 | chr8 | 121215947 | 121216109 |
| LIT | NM_021110 | COL14A1 | chr8 | 121219181 | 121219333 |
| LIT | NM_021110 | COL14A1 | chr8 | 121220470 | 121220600 |



|     |           |         |       |           |           |
|-----|-----------|---------|-------|-----------|-----------|
| LIT | NM_021110 | COL14A1 | chr8  | 121221994 | 121222140 |
| LIT | NM_021110 | COL14A1 | chr8  | 121224686 | 121224816 |
| LIT | NM_021110 | COL14A1 | chr8  | 121228589 | 121228729 |
| LIT | NM_021110 | COL14A1 | chr8  | 121237326 | 121237453 |
| LIT | NM_021110 | COL14A1 | chr8  | 121238865 | 121239005 |
| LIT | NM_021110 | COL14A1 | chr8  | 121239458 | 121239591 |
| LIT | NM_021110 | COL14A1 | chr8  | 121240948 | 121241008 |
| LIT | NM_021110 | COL14A1 | chr8  | 121243705 | 121243857 |
| LIT | NM_021110 | COL14A1 | chr8  | 121256117 | 121256247 |
| LIT | NM_021110 | COL14A1 | chr8  | 121259851 | 121259974 |
| LIT | NM_021110 | COL14A1 | chr8  | 121262855 | 121263005 |
| LIT | NM_021110 | COL14A1 | chr8  | 121267478 | 121267595 |
| LIT | NM_021110 | COL14A1 | chr8  | 121275106 | 121275253 |
| LIT | NM_021110 | COL14A1 | chr8  | 121279065 | 121279122 |
| LIT | NM_021110 | COL14A1 | chr8  | 121282273 | 121282413 |
| LIT | NM_021110 | COL14A1 | chr8  | 121290349 | 121290473 |
| LIT | NM_021110 | COL14A1 | chr8  | 121290673 | 121290817 |
| LIT | NM_021110 | COL14A1 | chr8  | 121292173 | 121292338 |
| LIT | NM_021110 | COL14A1 | chr8  | 121292949 | 121292988 |
| LIT | NM_021110 | COL14A1 | chr8  | 121293159 | 121293298 |
| LIT | NM_021110 | COL14A1 | chr8  | 121295874 | 121296017 |
| LIT | NM_021110 | COL14A1 | chr8  | 121298099 | 121298209 |
| LIT | NM_021110 | COL14A1 | chr8  | 121301846 | 121302005 |
| LIT | NM_021110 | COL14A1 | chr8  | 121309749 | 121309827 |
| LIT | NM_021110 | COL14A1 | chr8  | 121312970 | 121313057 |
| LIT | NM_021110 | COL14A1 | chr8  | 121322247 | 121322301 |
| LIT | NM_021110 | COL14A1 | chr8  | 121326170 | 121326266 |
| LIT | NM_021110 | COL14A1 | chr8  | 121327771 | 121327825 |
| LIT | NM_021110 | COL14A1 | chr8  | 121328182 | 121328236 |
| LIT | NM_021110 | COL14A1 | chr8  | 121344379 | 121344433 |
| LIT | NM_021110 | COL14A1 | chr8  | 121344902 | 121344974 |
| LIT | NM_021110 | COL14A1 | chr8  | 121353563 | 121353599 |
| LIT | NM_021110 | COL14A1 | chr8  | 121354618 | 121354685 |
| LIT | NM_021110 | COL14A1 | chr8  | 121357613 | 121357802 |
| LIT | NM_021110 | COL14A1 | chr8  | 121379409 | 121379487 |
| LIT | NM_021110 | COL14A1 | chr8  | 121381568 | 121381724 |
| LIT | NM_021110 | COL14A1 | chr8  | 121383390 | 121384273 |
| SMG | NM_000494 | COL17A1 | chr10 | 105791045 | 105792048 |
| SMG | NM_000494 | COL17A1 | chr10 | 105792431 | 105792512 |
| SMG | NM_000494 | COL17A1 | chr10 | 105792663 | 105792726 |
| SMG | NM_000494 | COL17A1 | chr10 | 105792995 | 105793133 |
| SMG | NM_000494 | COL17A1 | chr10 | 105793702 | 105794092 |
| SMG | NM_000494 | COL17A1 | chr10 | 105794378 | 105794525 |

|     |           |         |       |           |           |
|-----|-----------|---------|-------|-----------|-----------|
| SMG | NM_000494 | COL17A1 | chr10 | 105795020 | 105795131 |
| SMG | NM_000494 | COL17A1 | chr10 | 105795231 | 105795321 |
| SMG | NM_000494 | COL17A1 | chr10 | 105796249 | 105796390 |
| SMG | NM_000494 | COL17A1 | chr10 | 105796802 | 105796871 |
| SMG | NM_000494 | COL17A1 | chr10 | 105797393 | 105797531 |
| SMG | NM_000494 | COL17A1 | chr10 | 105798163 | 105798286 |
| SMG | NM_000494 | COL17A1 | chr10 | 105798828 | 105798879 |
| SMG | NM_000494 | COL17A1 | chr10 | 105799202 | 105799277 |
| SMG | NM_000494 | COL17A1 | chr10 | 105799365 | 105799398 |
| SMG | NM_000494 | COL17A1 | chr10 | 105799730 | 105799757 |
| SMG | NM_000494 | COL17A1 | chr10 | 105800108 | 105800168 |
| SMG | NM_000494 | COL17A1 | chr10 | 105800822 | 105800876 |
| SMG | NM_000494 | COL17A1 | chr10 | 105801060 | 105801102 |
| SMG | NM_000494 | COL17A1 | chr10 | 105801242 | 105801296 |
| SMG | NM_000494 | COL17A1 | chr10 | 105802177 | 105802213 |
| SMG | NM_000494 | COL17A1 | chr10 | 105803258 | 105803339 |
| SMG | NM_000494 | COL17A1 | chr10 | 105803582 | 105803618 |
| SMG | NM_000494 | COL17A1 | chr10 | 105805515 | 105805551 |
| SMG | NM_000494 | COL17A1 | chr10 | 105806504 | 105806531 |
| SMG | NM_000494 | COL17A1 | chr10 | 105807496 | 105807568 |
| SMG | NM_000494 | COL17A1 | chr10 | 105807826 | 105807862 |
| SMG | NM_000494 | COL17A1 | chr10 | 105809166 | 105809229 |
| SMG | NM_000494 | COL17A1 | chr10 | 105809846 | 105809882 |
| SMG | NM_000494 | COL17A1 | chr10 | 105810378 | 105810414 |
| SMG | NM_000494 | COL17A1 | chr10 | 105810605 | 105810659 |
| SMG | NM_000494 | COL17A1 | chr10 | 105811238 | 105811274 |
| SMG | NM_000494 | COL17A1 | chr10 | 105811912 | 105811975 |
| SMG | NM_000494 | COL17A1 | chr10 | 105812788 | 105812893 |
| SMG | NM_000494 | COL17A1 | chr10 | 105813677 | 105813740 |
| SMG | NM_000494 | COL17A1 | chr10 | 105813849 | 105813876 |
| SMG | NM_000494 | COL17A1 | chr10 | 105814738 | 105814765 |
| SMG | NM_000494 | COL17A1 | chr10 | 105815129 | 105815159 |
| SMG | NM_000494 | COL17A1 | chr10 | 105815539 | 105815761 |
| SMG | NM_000494 | COL17A1 | chr10 | 105816732 | 105816930 |
| SMG | NM_000494 | COL17A1 | chr10 | 105817903 | 105817948 |
| SMG | NM_000494 | COL17A1 | chr10 | 105819395 | 105819476 |
| SMG | NM_000494 | COL17A1 | chr10 | 105819876 | 105820038 |
| SMG | NM_000494 | COL17A1 | chr10 | 105821162 | 105821231 |
| SMG | NM_000494 | COL17A1 | chr10 | 105822015 | 105822087 |
| SMG | NM_000494 | COL17A1 | chr10 | 105823504 | 105823576 |
| SMG | NM_000494 | COL17A1 | chr10 | 105824195 | 105824354 |
| SMG | NM_000494 | COL17A1 | chr10 | 105830183 | 105830327 |
| SMG | NM_000494 | COL17A1 | chr10 | 105831789 | 105831837 |

|     |           |         |       |           |           |
|-----|-----------|---------|-------|-----------|-----------|
| SMG | NM_000494 | COL17A1 | chr10 | 105832967 | 105833003 |
| SMG | NM_000494 | COL17A1 | chr10 | 105833941 | 105833989 |
| SMG | NM_000494 | COL17A1 | chr10 | 105836058 | 105836187 |
| SMG | NM_000494 | COL17A1 | chr10 | 105837179 | 105837284 |
| SMG | NM_000494 | COL17A1 | chr10 | 105838299 | 105838344 |
| SMG | NM_000494 | COL17A1 | chr10 | 105840379 | 105840442 |
| SMG | NM_000494 | COL17A1 | chr10 | 105845480 | 105845638 |
| SMG | NM_001858 | COL19A1 | chr6  | 70576447  | 70576532  |
| SMG | NM_001858 | COL19A1 | chr6  | 70589427  | 70589550  |
| SMG | NM_001858 | COL19A1 | chr6  | 70608839  | 70608914  |
| SMG | NM_001858 | COL19A1 | chr6  | 70610130  | 70610230  |
| SMG | NM_001858 | COL19A1 | chr6  | 70637800  | 70637924  |
| SMG | NM_001858 | COL19A1 | chr6  | 70639316  | 70639592  |
| SMG | NM_001858 | COL19A1 | chr6  | 70642674  | 70642755  |
| SMG | NM_001858 | COL19A1 | chr6  | 70646676  | 70646802  |
| SMG | NM_001858 | COL19A1 | chr6  | 70647929  | 70647992  |
| SMG | NM_001858 | COL19A1 | chr6  | 70669887  | 70669932  |
| SMG | NM_001858 | COL19A1 | chr6  | 70672717  | 70672762  |
| SMG | NM_001858 | COL19A1 | chr6  | 70733518  | 70733572  |
| SMG | NM_001858 | COL19A1 | chr6  | 70744136  | 70744190  |
| SMG | NM_001858 | COL19A1 | chr6  | 70745795  | 70745831  |
| SMG | NM_001858 | COL19A1 | chr6  | 70778314  | 70778368  |
| SMG | NM_001858 | COL19A1 | chr6  | 70812060  | 70812114  |
| SMG | NM_001858 | COL19A1 | chr6  | 70831771  | 70831834  |
| SMG | NM_001858 | COL19A1 | chr6  | 70840073  | 70840115  |
| SMG | NM_001858 | COL19A1 | chr6  | 70847576  | 70847639  |
| SMG | NM_001858 | COL19A1 | chr6  | 70850845  | 70850881  |
| SMG | NM_001858 | COL19A1 | chr6  | 70851784  | 70851820  |
| SMG | NM_001858 | COL19A1 | chr6  | 70851914  | 70851968  |
| SMG | NM_001858 | COL19A1 | chr6  | 70852658  | 70852712  |
| SMG | NM_001858 | COL19A1 | chr6  | 70854101  | 70854155  |
| SMG | NM_001858 | COL19A1 | chr6  | 70854809  | 70854899  |
| SMG | NM_001858 | COL19A1 | chr6  | 70856550  | 70856595  |
| SMG | NM_001858 | COL19A1 | chr6  | 70856703  | 70856781  |
| SMG | NM_001858 | COL19A1 | chr6  | 70859595  | 70859631  |
| SMG | NM_001858 | COL19A1 | chr6  | 70859742  | 70859796  |
| SMG | NM_001858 | COL19A1 | chr6  | 70859883  | 70859937  |
| SMG | NM_001858 | COL19A1 | chr6  | 70861288  | 70861330  |
| SMG | NM_001858 | COL19A1 | chr6  | 70866018  | 70866123  |
| SMG | NM_001858 | COL19A1 | chr6  | 70866207  | 70866261  |
| SMG | NM_001858 | COL19A1 | chr6  | 70866561  | 70866615  |
| SMG | NM_001858 | COL19A1 | chr6  | 70871791  | 70871845  |
| SMG | NM_001858 | COL19A1 | chr6  | 70873234  | 70873288  |

|     |              |         |       |           |           |
|-----|--------------|---------|-------|-----------|-----------|
| SMG | NM_001858    | COL19A1 | chr6  | 70875832  | 70875877  |
| SMG | NM_001858    | COL19A1 | chr6  | 70877916  | 70877967  |
| SMG | NM_001858    | COL19A1 | chr6  | 70878062  | 70878107  |
| SMG | NM_001858    | COL19A1 | chr6  | 70878546  | 70878573  |
| SMG | NM_001858    | COL19A1 | chr6  | 70881855  | 70881909  |
| SMG | NM_001858    | COL19A1 | chr6  | 70886411  | 70886456  |
| SMG | NM_001858    | COL19A1 | chr6  | 70890203  | 70890248  |
| SMG | NM_001858    | COL19A1 | chr6  | 70890352  | 70890415  |
| SMG | NM_001858    | COL19A1 | chr6  | 70894594  | 70894630  |
| SMG | NM_001858    | COL19A1 | chr6  | 70894762  | 70894807  |
| SMG | NM_001858    | COL19A1 | chr6  | 70897778  | 70897949  |
| SMG | NM_001858    | COL19A1 | chr6  | 70900018  | 70900085  |
| SMG | NM_001858    | COL19A1 | chr6  | 70909311  | 70909440  |
| SMG | NM_001858    | COL19A1 | chr6  | 70916604  | 70916682  |
| SMG | NM_001858    | COL19A1 | chr6  | 70916850  | 70922157  |
| CNV | NM_020361    | CPA6    | chr8  | 68334404  | 68334926  |
| CNV | NM_020361    | CPA6    | chr8  | 68340281  | 68340366  |
| CNV | NM_020361    | CPA6    | chr8  | 68346272  | 68346475  |
| CNV | NM_020361    | CPA6    | chr8  | 68396002  | 68396093  |
| CNV | NM_020361    | CPA6    | chr8  | 68396913  | 68397024  |
| CNV | NM_020361    | CPA6    | chr8  | 68419021  | 68419123  |
| CNV | NM_020361    | CPA6    | chr8  | 68421751  | 68421853  |
| CNV | NM_020361    | CPA6    | chr8  | 68423775  | 68423890  |
| CNV | NM_020361    | CPA6    | chr8  | 68430157  | 68430282  |
| CNV | NM_020361    | CPA6    | chr8  | 68536410  | 68536486  |
| CNV | NM_020361    | CPA6    | chr8  | 68658248  | 68658620  |
| SMG | NM_000098    | CPT2    | chr1  | 53662100  | 53662767  |
| SMG | NM_000098    | CPT2    | chr1  | 53666390  | 53666471  |
| SMG | NM_000098    | CPT2    | chr1  | 53667994  | 53668101  |
| SMG | NM_000098    | CPT2    | chr1  | 53675686  | 53676991  |
| SMG | NM_000098    | CPT2    | chr1  | 53678935  | 53679869  |
| SMG | NM_001184771 | CPXCR1  | chrX  | 88002225  | 88002332  |
| SMG | NM_001184771 | CPXCR1  | chrX  | 88004318  | 88004424  |
| SMG | NM_001184771 | CPXCR1  | chrX  | 88008407  | 88009785  |
| SMG | NM_198148    | CPXM2   | chr10 | 125505151 | 125506533 |
| SMG | NM_198148    | CPXM2   | chr10 | 125514178 | 125514278 |
| SMG | NM_198148    | CPXM2   | chr10 | 125516728 | 125516868 |
| SMG | NM_198148    | CPXM2   | chr10 | 125521387 | 125521685 |
| SMG | NM_198148    | CPXM2   | chr10 | 125526488 | 125526668 |
| SMG | NM_198148    | CPXM2   | chr10 | 125528041 | 125528238 |
| SMG | NM_198148    | CPXM2   | chr10 | 125530431 | 125530555 |
| SMG | NM_198148    | CPXM2   | chr10 | 125539682 | 125539771 |
| SMG | NM_198148    | CPXM2   | chr10 | 125557491 | 125557642 |

|     |              |        |       |           |           |
|-----|--------------|--------|-------|-----------|-----------|
| SMG | NM_198148    | CPXM2  | chr10 | 125558630 | 125558715 |
| SMG | NM_198148    | CPXM2  | chr10 | 125601864 | 125602004 |
| SMG | NM_198148    | CPXM2  | chr10 | 125622129 | 125622239 |
| SMG | NM_198148    | CPXM2  | chr10 | 125639726 | 125639825 |
| SMG | NM_198148    | CPXM2  | chr10 | 125650871 | 125651500 |
| SMG | NM_006368    | CREB3  | chr9  | 35732316  | 35732898  |
| SMG | NM_006368    | CREB3  | chr9  | 35732992  | 35733140  |
| SMG | NM_006368    | CREB3  | chr9  | 35733211  | 35733279  |
| SMG | NM_006368    | CREB3  | chr9  | 35733392  | 35733482  |
| SMG | NM_006368    | CREB3  | chr9  | 35735105  | 35735212  |
| SMG | NM_006368    | CREB3  | chr9  | 35735302  | 35735371  |
| SMG | NM_006368    | CREB3  | chr9  | 35736044  | 35736129  |
| SMG | NM_006368    | CREB3  | chr9  | 35736223  | 35736308  |
| SMG | NM_006368    | CREB3  | chr9  | 35736388  | 35737005  |
| SMG | NM_001098482 | CRTC1  | chr19 | 18794424  | 18794638  |
| SMG | NM_001098482 | CRTC1  | chr19 | 18853719  | 18853836  |
| SMG | NM_001098482 | CRTC1  | chr19 | 18854917  | 18854965  |
| SMG | NM_001098482 | CRTC1  | chr19 | 18856632  | 18856770  |
| SMG | NM_001098482 | CRTC1  | chr19 | 18857862  | 18857924  |
| SMG | NM_001098482 | CRTC1  | chr19 | 18860590  | 18860685  |
| SMG | NM_001098482 | CRTC1  | chr19 | 18864309  | 18864395  |
| SMG | NM_001098482 | CRTC1  | chr19 | 18870360  | 18870401  |
| SMG | NM_001098482 | CRTC1  | chr19 | 18870817  | 18871038  |
| SMG | NM_001098482 | CRTC1  | chr19 | 18876213  | 18876338  |
| SMG | NM_001098482 | CRTC1  | chr19 | 18879294  | 18879603  |
| SMG | NM_001098482 | CRTC1  | chr19 | 18882251  | 18882356  |
| SMG | NM_001098482 | CRTC1  | chr19 | 18885709  | 18885796  |
| SMG | NM_001098482 | CRTC1  | chr19 | 18886450  | 18886631  |
| SMG | NM_001098482 | CRTC1  | chr19 | 18887980  | 18893143  |
| SMG | NM_001887    | CRYBB1 | chr22 | 26995361  | 26995637  |
| SMG | NM_001887    | CRYBB1 | chr22 | 26997842  | 26997985  |
| SMG | NM_001887    | CRYBB1 | chr22 | 27003852  | 27003985  |
| SMG | NM_001887    | CRYBB1 | chr22 | 27008035  | 27008154  |
| SMG | NM_001887    | CRYBB1 | chr22 | 27012103  | 27012302  |
| SMG | NM_001887    | CRYBB1 | chr22 | 27013940  | 27013991  |
| DRV | NM_005211    | CSF1R  | chr5  | 149432853 | 149433787 |
| DRV | NM_005211    | CSF1R  | chr5  | 149433884 | 149433993 |
| DRV | NM_005211    | CSF1R  | chr5  | 149434799 | 149434899 |
| DRV | NM_005211    | CSF1R  | chr5  | 149435588 | 149435700 |
| DRV | NM_005211    | CSF1R  | chr5  | 149435781 | 149435904 |
| DRV | NM_005211    | CSF1R  | chr5  | 149436849 | 149436947 |
| DRV | NM_005211    | CSF1R  | chr5  | 149437066 | 149437155 |
| DRV | NM_005211    | CSF1R  | chr5  | 149439262 | 149439425 |

|     |           |       |      |           |           |
|-----|-----------|-------|------|-----------|-----------|
| DRV | NM_005211 | CSF1R | chr5 | 149440424 | 149440535 |
| DRV | NM_005211 | CSF1R | chr5 | 149441053 | 149441158 |
| DRV | NM_005211 | CSF1R | chr5 | 149441285 | 149441412 |
| DRV | NM_005211 | CSF1R | chr5 | 149447777 | 149447893 |
| DRV | NM_005211 | CSF1R | chr5 | 149449435 | 149449626 |
| DRV | NM_005211 | CSF1R | chr5 | 149449744 | 149449865 |
| DRV | NM_005211 | CSF1R | chr5 | 149450018 | 149450134 |
| DRV | NM_005211 | CSF1R | chr5 | 149452863 | 149453056 |
| DRV | NM_005211 | CSF1R | chr5 | 149456838 | 149456998 |
| DRV | NM_005211 | CSF1R | chr5 | 149457674 | 149457811 |
| DRV | NM_005211 | CSF1R | chr5 | 149459614 | 149459899 |
| DRV | NM_005211 | CSF1R | chr5 | 149460329 | 149460587 |
| DRV | NM_005211 | CSF1R | chr5 | 149465941 | 149466170 |
| DRV | NM_005211 | CSF1R | chr5 | 149492823 | 149492935 |
| CNV | NM_033225 | CSMD1 | chr8 | 2792874   | 2796266   |
| CNV | NM_033225 | CSMD1 | chr8 | 2799993   | 2800126   |
| CNV | NM_033225 | CSMD1 | chr8 | 2806820   | 2806908   |
| CNV | NM_033225 | CSMD1 | chr8 | 2807752   | 2807865   |
| CNV | NM_033225 | CSMD1 | chr8 | 2808635   | 2808797   |
| CNV | NM_033225 | CSMD1 | chr8 | 2811745   | 2811790   |
| CNV | NM_033225 | CSMD1 | chr8 | 2813110   | 2813290   |
| CNV | NM_033225 | CSMD1 | chr8 | 2815217   | 2815329   |
| CNV | NM_033225 | CSMD1 | chr8 | 2818662   | 2818736   |
| CNV | NM_033225 | CSMD1 | chr8 | 2819987   | 2820161   |
| CNV | NM_033225 | CSMD1 | chr8 | 2820743   | 2820917   |
| CNV | NM_033225 | CSMD1 | chr8 | 2823296   | 2823476   |
| CNV | NM_033225 | CSMD1 | chr8 | 2824091   | 2824268   |
| CNV | NM_033225 | CSMD1 | chr8 | 2830638   | 2830821   |
| CNV | NM_033225 | CSMD1 | chr8 | 2831972   | 2832146   |
| CNV | NM_033225 | CSMD1 | chr8 | 2836133   | 2836322   |
| CNV | NM_033225 | CSMD1 | chr8 | 2855532   | 2855706   |
| CNV | NM_033225 | CSMD1 | chr8 | 2857479   | 2857653   |
| CNV | NM_033225 | CSMD1 | chr8 | 2875998   | 2876172   |
| CNV | NM_033225 | CSMD1 | chr8 | 2886840   | 2887035   |
| CNV | NM_033225 | CSMD1 | chr8 | 2909983   | 2910169   |
| CNV | NM_033225 | CSMD1 | chr8 | 2944618   | 2944807   |
| CNV | NM_033225 | CSMD1 | chr8 | 2949037   | 2949184   |
| CNV | NM_033225 | CSMD1 | chr8 | 2954370   | 2954559   |
| CNV | NM_033225 | CSMD1 | chr8 | 2964049   | 2964163   |
| CNV | NM_033225 | CSMD1 | chr8 | 2965239   | 2965320   |
| CNV | NM_033225 | CSMD1 | chr8 | 2966124   | 2966270   |
| CNV | NM_033225 | CSMD1 | chr8 | 2967679   | 2967857   |
| CNV | NM_033225 | CSMD1 | chr8 | 2975920   | 2976109   |

|     |           |       |      |           |           |
|-----|-----------|-------|------|-----------|-----------|
| CNV | NM_033225 | CSMD1 | chr8 | 2999986   | 3000196   |
| CNV | NM_033225 | CSMD1 | chr8 | 3008918   | 3009035   |
| CNV | NM_033225 | CSMD1 | chr8 | 3015418   | 3015488   |
| CNV | NM_033225 | CSMD1 | chr8 | 3019680   | 3019799   |
| CNV | NM_033225 | CSMD1 | chr8 | 3038631   | 3038736   |
| CNV | NM_033225 | CSMD1 | chr8 | 3045390   | 3045487   |
| CNV | NM_033225 | CSMD1 | chr8 | 3046408   | 3046533   |
| CNV | NM_033225 | CSMD1 | chr8 | 3047433   | 3047637   |
| CNV | NM_033225 | CSMD1 | chr8 | 3057235   | 3057331   |
| CNV | NM_033225 | CSMD1 | chr8 | 3059133   | 3059247   |
| CNV | NM_033225 | CSMD1 | chr8 | 3063025   | 3063142   |
| CNV | NM_033225 | CSMD1 | chr8 | 3072018   | 3072213   |
| CNV | NM_033225 | CSMD1 | chr8 | 3076776   | 3076964   |
| CNV | NM_033225 | CSMD1 | chr8 | 3081250   | 3081389   |
| CNV | NM_033225 | CSMD1 | chr8 | 3087561   | 3087753   |
| CNV | NM_033225 | CSMD1 | chr8 | 3141665   | 3141868   |
| CNV | NM_033225 | CSMD1 | chr8 | 3165216   | 3165343   |
| CNV | NM_033225 | CSMD1 | chr8 | 3165833   | 3166025   |
| CNV | NM_033225 | CSMD1 | chr8 | 3200815   | 3200972   |
| CNV | NM_033225 | CSMD1 | chr8 | 3205513   | 3205683   |
| CNV | NM_033225 | CSMD1 | chr8 | 3216673   | 3216862   |
| CNV | NM_033225 | CSMD1 | chr8 | 3224553   | 3224769   |
| CNV | NM_033225 | CSMD1 | chr8 | 3226775   | 3226892   |
| CNV | NM_033225 | CSMD1 | chr8 | 3245015   | 3245204   |
| CNV | NM_033225 | CSMD1 | chr8 | 3253715   | 3253903   |
| CNV | NM_033225 | CSMD1 | chr8 | 3256912   | 3257051   |
| CNV | NM_033225 | CSMD1 | chr8 | 3263548   | 3263743   |
| CNV | NM_033225 | CSMD1 | chr8 | 3265420   | 3265747   |
| CNV | NM_033225 | CSMD1 | chr8 | 3266944   | 3267127   |
| CNV | NM_033225 | CSMD1 | chr8 | 3326233   | 3326346   |
| CNV | NM_033225 | CSMD1 | chr8 | 3351144   | 3351248   |
| CNV | NM_033225 | CSMD1 | chr8 | 3432466   | 3432588   |
| CNV | NM_033225 | CSMD1 | chr8 | 3443657   | 3443782   |
| CNV | NM_033225 | CSMD1 | chr8 | 3474231   | 3474319   |
| CNV | NM_033225 | CSMD1 | chr8 | 3565935   | 3566013   |
| CNV | NM_033225 | CSMD1 | chr8 | 3611451   | 3611564   |
| CNV | NM_033225 | CSMD1 | chr8 | 3855424   | 3855632   |
| CNV | NM_033225 | CSMD1 | chr8 | 3889426   | 3889621   |
| CNV | NM_033225 | CSMD1 | chr8 | 4277474   | 4277587   |
| CNV | NM_033225 | CSMD1 | chr8 | 4494863   | 4495080   |
| CNV | NM_033225 | CSMD1 | chr8 | 4851853   | 4852328   |
| LIT | NM_052900 | CSMD3 | chr8 | 113235158 | 113237159 |
| LIT | NM_052900 | CSMD3 | chr8 | 113240984 | 113241120 |

|     |           |       |      |           |           |
|-----|-----------|-------|------|-----------|-----------|
| LIT | NM_052900 | CSMD3 | chr8 | 113243773 | 113243861 |
| LIT | NM_052900 | CSMD3 | chr8 | 113246593 | 113246706 |
| LIT | NM_052900 | CSMD3 | chr8 | 113249418 | 113249577 |
| LIT | NM_052900 | CSMD3 | chr8 | 113253948 | 113254014 |
| LIT | NM_052900 | CSMD3 | chr8 | 113256622 | 113256802 |
| LIT | NM_052900 | CSMD3 | chr8 | 113259248 | 113259360 |
| LIT | NM_052900 | CSMD3 | chr8 | 113266481 | 113266555 |
| LIT | NM_052900 | CSMD3 | chr8 | 113267482 | 113267656 |
| LIT | NM_052900 | CSMD3 | chr8 | 113275867 | 113276041 |
| LIT | NM_052900 | CSMD3 | chr8 | 113277639 | 113277819 |
| LIT | NM_052900 | CSMD3 | chr8 | 113293402 | 113293579 |
| LIT | NM_052900 | CSMD3 | chr8 | 113299292 | 113299475 |
| LIT | NM_052900 | CSMD3 | chr8 | 113301593 | 113301767 |
| LIT | NM_052900 | CSMD3 | chr8 | 113303738 | 113303924 |
| LIT | NM_052900 | CSMD3 | chr8 | 113304765 | 113304939 |
| LIT | NM_052900 | CSMD3 | chr8 | 113308061 | 113308235 |
| LIT | NM_052900 | CSMD3 | chr8 | 113314021 | 113314195 |
| LIT | NM_052900 | CSMD3 | chr8 | 113318235 | 113318421 |
| LIT | NM_052900 | CSMD3 | chr8 | 113323206 | 113323395 |
| LIT | NM_052900 | CSMD3 | chr8 | 113326134 | 113326281 |
| LIT | NM_052900 | CSMD3 | chr8 | 113326657 | 113326846 |
| LIT | NM_052900 | CSMD3 | chr8 | 113331065 | 113331179 |
| LIT | NM_052900 | CSMD3 | chr8 | 113332129 | 113332210 |
| LIT | NM_052900 | CSMD3 | chr8 | 113347557 | 113347703 |
| LIT | NM_052900 | CSMD3 | chr8 | 113348880 | 113349058 |
| LIT | NM_052900 | CSMD3 | chr8 | 113349771 | 113349960 |
| LIT | NM_052900 | CSMD3 | chr8 | 113353705 | 113353915 |
| LIT | NM_052900 | CSMD3 | chr8 | 113358325 | 113358442 |
| LIT | NM_052900 | CSMD3 | chr8 | 113363403 | 113363473 |
| LIT | NM_052900 | CSMD3 | chr8 | 113364644 | 113364763 |
| LIT | NM_052900 | CSMD3 | chr8 | 113392580 | 113392685 |
| LIT | NM_052900 | CSMD3 | chr8 | 113395795 | 113395892 |
| LIT | NM_052900 | CSMD3 | chr8 | 113402892 | 113403017 |
| LIT | NM_052900 | CSMD3 | chr8 | 113418752 | 113418956 |
| LIT | NM_052900 | CSMD3 | chr8 | 113420546 | 113420642 |
| LIT | NM_052900 | CSMD3 | chr8 | 113421147 | 113421261 |
| LIT | NM_052900 | CSMD3 | chr8 | 113484819 | 113484936 |
| LIT | NM_052900 | CSMD3 | chr8 | 113504717 | 113504912 |
| LIT | NM_052900 | CSMD3 | chr8 | 113516018 | 113516206 |
| LIT | NM_052900 | CSMD3 | chr8 | 113518919 | 113519058 |
| LIT | NM_052900 | CSMD3 | chr8 | 113529262 | 113529454 |
| LIT | NM_052900 | CSMD3 | chr8 | 113562899 | 113563102 |
| LIT | NM_052900 | CSMD3 | chr8 | 113564822 | 113564949 |



|     |              |        |       |           |           |
|-----|--------------|--------|-------|-----------|-----------|
| LIT | NM_052900    | CSMD3  | chr8  | 113568991 | 113569183 |
| LIT | NM_052900    | CSMD3  | chr8  | 113585729 | 113585886 |
| LIT | NM_052900    | CSMD3  | chr8  | 113599294 | 113599464 |
| LIT | NM_052900    | CSMD3  | chr8  | 113649045 | 113649234 |
| LIT | NM_052900    | CSMD3  | chr8  | 113650924 | 113651140 |
| LIT | NM_052900    | CSMD3  | chr8  | 113657337 | 113657454 |
| LIT | NM_052900    | CSMD3  | chr8  | 113662389 | 113662578 |
| LIT | NM_052900    | CSMD3  | chr8  | 113668382 | 113668570 |
| LIT | NM_052900    | CSMD3  | chr8  | 113678505 | 113678644 |
| LIT | NM_052900    | CSMD3  | chr8  | 113694670 | 113694865 |
| LIT | NM_052900    | CSMD3  | chr8  | 113697634 | 113697961 |
| LIT | NM_052900    | CSMD3  | chr8  | 113702096 | 113702279 |
| LIT | NM_052900    | CSMD3  | chr8  | 113812390 | 113812503 |
| LIT | NM_052900    | CSMD3  | chr8  | 113841914 | 113842018 |
| LIT | NM_052900    | CSMD3  | chr8  | 113871373 | 113871495 |
| LIT | NM_052900    | CSMD3  | chr8  | 113933855 | 113933980 |
| LIT | NM_052900    | CSMD3  | chr8  | 113960018 | 113960106 |
| LIT | NM_052900    | CSMD3  | chr8  | 113966912 | 113966990 |
| LIT | NM_052900    | CSMD3  | chr8  | 114031295 | 114031408 |
| LIT | NM_052900    | CSMD3  | chr8  | 114110984 | 114111192 |
| LIT | NM_052900    | CSMD3  | chr8  | 114185950 | 114186145 |
| LIT | NM_052900    | CSMD3  | chr8  | 114290820 | 114290933 |
| LIT | NM_052900    | CSMD3  | chr8  | 114326799 | 114327022 |
| LIT | NM_052900    | CSMD3  | chr8  | 114448905 | 114449242 |
| SMG | NM_001193570 | CSRP1  | chr1  | 201452657 | 201453917 |
| SMG | NM_001193570 | CSRP1  | chr1  | 201454410 | 201454504 |
| SMG | NM_001193570 | CSRP1  | chr1  | 201458000 | 201458112 |
| SMG | NM_001193570 | CSRP1  | chr1  | 201459303 | 201459472 |
| SMG | NM_001193570 | CSRP1  | chr1  | 201465319 | 201465432 |
| SMG | NM_001193570 | CSRP1  | chr1  | 201476197 | 201476387 |
| LIT | NM_001191022 | CTCF   | chr16 | 67596309  | 67596627  |
| LIT | NM_001191022 | CTCF   | chr16 | 67605050  | 67605167  |
| LIT | NM_001191022 | CTCF   | chr16 | 67650647  | 67650781  |
| LIT | NM_001191022 | CTCF   | chr16 | 67654599  | 67654720  |
| LIT | NM_001191022 | CTCF   | chr16 | 67655344  | 67655494  |
| LIT | NM_001191022 | CTCF   | chr16 | 67660457  | 67660618  |
| LIT | NM_001191022 | CTCF   | chr16 | 67662272  | 67662455  |
| LIT | NM_001191022 | CTCF   | chr16 | 67663300  | 67663436  |
| LIT | NM_001191022 | CTCF   | chr16 | 67670592  | 67670754  |
| LIT | NM_001191022 | CTCF   | chr16 | 67671590  | 67673088  |
| DRV | NM_001098209 | CTNNB1 | chr3  | 41240941  | 41241161  |
| DRV | NM_001098209 | CTNNB1 | chr3  | 41265511  | 41265572  |
| DRV | NM_001098209 | CTNNB1 | chr3  | 41266016  | 41266244  |

|     |              |        |      |           |           |
|-----|--------------|--------|------|-----------|-----------|
| DRV | NM_001098209 | CTNNB1 | chr3 | 41266444  | 41266698  |
| DRV | NM_001098209 | CTNNB1 | chr3 | 41266824  | 41267063  |
| DRV | NM_001098209 | CTNNB1 | chr3 | 41267150  | 41267352  |
| DRV | NM_001098209 | CTNNB1 | chr3 | 41268698  | 41268843  |
| DRV | NM_001098209 | CTNNB1 | chr3 | 41274831  | 41274935  |
| DRV | NM_001098209 | CTNNB1 | chr3 | 41275019  | 41275358  |
| DRV | NM_001098209 | CTNNB1 | chr3 | 41275629  | 41275788  |
| DRV | NM_001098209 | CTNNB1 | chr3 | 41277214  | 41277334  |
| DRV | NM_001098209 | CTNNB1 | chr3 | 41277839  | 41277990  |
| DRV | NM_001098209 | CTNNB1 | chr3 | 41278078  | 41278200  |
| DRV | NM_001098209 | CTNNB1 | chr3 | 41279506  | 41279567  |
| DRV | NM_001098209 | CTNNB1 | chr3 | 41280624  | 41280845  |
| DRV | NM_001098209 | CTNNB1 | chr3 | 41281150  | 41281939  |
| SMG | NM_001334    | CTSO   | chr4 | 156845269 | 156847222 |
| SMG | NM_001334    | CTSO   | chr4 | 156849487 | 156849580 |
| SMG | NM_001334    | CTSO   | chr4 | 156850693 | 156850857 |
| SMG | NM_001334    | CTSO   | chr4 | 156858513 | 156858635 |
| SMG | NM_001334    | CTSO   | chr4 | 156860522 | 156860690 |
| SMG | NM_001334    | CTSO   | chr4 | 156863468 | 156863608 |
| SMG | NM_001334    | CTSO   | chr4 | 156864307 | 156864416 |
| SMG | NM_001334    | CTSO   | chr4 | 156874864 | 156875048 |
| SMG | NM_003592    | CUL1   | chr7 | 148395932 | 148396121 |
| SMG | NM_003592    | CUL1   | chr7 | 148427053 | 148427354 |
| SMG | NM_003592    | CUL1   | chr7 | 148451067 | 148451242 |
| SMG | NM_003592    | CUL1   | chr7 | 148454074 | 148454242 |
| SMG | NM_003592    | CUL1   | chr7 | 148456395 | 148456446 |
| SMG | NM_003592    | CUL1   | chr7 | 148456639 | 148456730 |
| SMG | NM_003592    | CUL1   | chr7 | 148457424 | 148457588 |
| SMG | NM_003592    | CUL1   | chr7 | 148463652 | 148463815 |
| SMG | NM_003592    | CUL1   | chr7 | 148464710 | 148464841 |
| SMG | NM_003592    | CUL1   | chr7 | 148480874 | 148480982 |
| SMG | NM_003592    | CUL1   | chr7 | 148481062 | 148481169 |
| SMG | NM_003592    | CUL1   | chr7 | 148483642 | 148483691 |
| SMG | NM_003592    | CUL1   | chr7 | 148484080 | 148484212 |
| SMG | NM_003592    | CUL1   | chr7 | 148485648 | 148485766 |
| SMG | NM_003592    | CUL1   | chr7 | 148486841 | 148486918 |
| SMG | NM_003592    | CUL1   | chr7 | 148487401 | 148487533 |
| SMG | NM_003592    | CUL1   | chr7 | 148489817 | 148489910 |
| SMG | NM_003592    | CUL1   | chr7 | 148494903 | 148494951 |
| SMG | NM_003592    | CUL1   | chr7 | 148495028 | 148495111 |
| SMG | NM_003592    | CUL1   | chr7 | 148495663 | 148495769 |
| SMG | NM_003592    | CUL1   | chr7 | 148496366 | 148496480 |
| SMG | NM_003592    | CUL1   | chr7 | 148497593 | 148498202 |

|     |              |         |       |           |           |
|-----|--------------|---------|-------|-----------|-----------|
| SMG | NM_003478    | CUL5    | chr11 | 107879407 | 107880098 |
| SMG | NM_003478    | CUL5    | chr11 | 107904527 | 107904637 |
| SMG | NM_003478    | CUL5    | chr11 | 107916996 | 107917096 |
| SMG | NM_003478    | CUL5    | chr11 | 107920616 | 107920793 |
| SMG | NM_003478    | CUL5    | chr11 | 107923386 | 107923528 |
| SMG | NM_003478    | CUL5    | chr11 | 107925373 | 107925519 |
| SMG | NM_003478    | CUL5    | chr11 | 107925601 | 107925682 |
| SMG | NM_003478    | CUL5    | chr11 | 107940822 | 107940916 |
| SMG | NM_003478    | CUL5    | chr11 | 107943058 | 107943189 |
| SMG | NM_003478    | CUL5    | chr11 | 107944116 | 107944224 |
| SMG | NM_003478    | CUL5    | chr11 | 107948902 | 107948967 |
| SMG | NM_003478    | CUL5    | chr11 | 107959253 | 107959386 |
| SMG | NM_003478    | CUL5    | chr11 | 107960218 | 107960350 |
| SMG | NM_003478    | CUL5    | chr11 | 107965117 | 107965241 |
| SMG | NM_003478    | CUL5    | chr11 | 107965538 | 107965714 |
| SMG | NM_003478    | CUL5    | chr11 | 107966256 | 107966418 |
| SMG | NM_003478    | CUL5    | chr11 | 107968362 | 107968481 |
| SMG | NM_003478    | CUL5    | chr11 | 107969132 | 107969256 |
| SMG | NM_003478    | CUL5    | chr11 | 107974916 | 107978488 |
| SMG | NM_152434    | CWF19L2 | chr11 | 107197071 | 107197779 |
| SMG | NM_152434    | CWF19L2 | chr11 | 107200643 | 107200745 |
| SMG | NM_152434    | CWF19L2 | chr11 | 107205606 | 107205687 |
| SMG | NM_152434    | CWF19L2 | chr11 | 107207283 | 107207439 |
| SMG | NM_152434    | CWF19L2 | chr11 | 107219662 | 107219779 |
| SMG | NM_152434    | CWF19L2 | chr11 | 107224249 | 107224462 |
| SMG | NM_152434    | CWF19L2 | chr11 | 107260799 | 107260937 |
| SMG | NM_152434    | CWF19L2 | chr11 | 107263504 | 107263621 |
| SMG | NM_152434    | CWF19L2 | chr11 | 107286934 | 107287024 |
| SMG | NM_152434    | CWF19L2 | chr11 | 107288919 | 107289013 |
| SMG | NM_152434    | CWF19L2 | chr11 | 107299524 | 107300177 |
| SMG | NM_152434    | CWF19L2 | chr11 | 107304359 | 107304475 |
| SMG | NM_152434    | CWF19L2 | chr11 | 107309815 | 107309909 |
| SMG | NM_152434    | CWF19L2 | chr11 | 107312228 | 107312348 |
| SMG | NM_152434    | CWF19L2 | chr11 | 107313664 | 107313775 |
| SMG | NM_152434    | CWF19L2 | chr11 | 107325175 | 107325298 |
| SMG | NM_152434    | CWF19L2 | chr11 | 107326391 | 107326502 |
| SMG | NM_152434    | CWF19L2 | chr11 | 107328437 | 107328572 |
| CNV | NM_001207066 | CXADR   | chr21 | 18885223  | 18885490  |
| CNV | NM_001207066 | CXADR   | chr21 | 18919344  | 18919511  |
| CNV | NM_001207066 | CXADR   | chr21 | 18924066  | 18924271  |
| CNV | NM_001207066 | CXADR   | chr21 | 18931293  | 18931449  |
| CNV | NM_001207066 | CXADR   | chr21 | 18933019  | 18933142  |
| CNV | NM_001207066 | CXADR   | chr21 | 18933655  | 18933794  |

|     |              |         |       |           |           |
|-----|--------------|---------|-------|-----------|-----------|
| CNV | NM_001207066 | CXADR   | chr21 | 18937745  | 18937929  |
| CNV | NM_001207066 | CXADR   | chr21 | 18965469  | 18965897  |
| SMG | NM_002416    | CXCL9   | chr4  | 76922622  | 76924852  |
| SMG | NM_002416    | CXCL9   | chr4  | 76925961  | 76926046  |
| SMG | NM_002416    | CXCL9   | chr4  | 76927300  | 76927427  |
| SMG | NM_002416    | CXCL9   | chr4  | 76928538  | 76928641  |
| CNV | NM_003467    | CXCR4   | chr2  | 136871918 | 136873482 |
| CNV | NM_003467    | CXCR4   | chr2  | 136875615 | 136875725 |
| CNV | NM_014608    | CYFIP1  | chr15 | 22892683  | 22892781  |
| CNV | NM_014608    | CYFIP1  | chr15 | 22925776  | 22925899  |
| CNV | NM_014608    | CYFIP1  | chr15 | 22925975  | 22926065  |
| CNV | NM_014608    | CYFIP1  | chr15 | 22928128  | 22928206  |
| CNV | NM_014608    | CYFIP1  | chr15 | 22928408  | 22928510  |
| CNV | NM_014608    | CYFIP1  | chr15 | 22929713  | 22929895  |
| CNV | NM_014608    | CYFIP1  | chr15 | 22933560  | 22933657  |
| CNV | NM_014608    | CYFIP1  | chr15 | 22933747  | 22933876  |
| CNV | NM_014608    | CYFIP1  | chr15 | 22935859  | 22935964  |
| CNV | NM_014608    | CYFIP1  | chr15 | 22939174  | 22939266  |
| CNV | NM_014608    | CYFIP1  | chr15 | 22940727  | 22940845  |
| CNV | NM_014608    | CYFIP1  | chr15 | 22945039  | 22945162  |
| CNV | NM_014608    | CYFIP1  | chr15 | 22946960  | 22947086  |
| CNV | NM_014608    | CYFIP1  | chr15 | 22954209  | 22954376  |
| CNV | NM_014608    | CYFIP1  | chr15 | 22955132  | 22955280  |
| CNV | NM_014608    | CYFIP1  | chr15 | 22956437  | 22956591  |
| CNV | NM_014608    | CYFIP1  | chr15 | 22958185  | 22958342  |
| CNV | NM_014608    | CYFIP1  | chr15 | 22960792  | 22960889  |
| CNV | NM_014608    | CYFIP1  | chr15 | 22962254  | 22962331  |
| CNV | NM_014608    | CYFIP1  | chr15 | 22962439  | 22962548  |
| CNV | NM_014608    | CYFIP1  | chr15 | 22963754  | 22963874  |
| CNV | NM_014608    | CYFIP1  | chr15 | 22969162  | 22969362  |
| CNV | NM_014608    | CYFIP1  | chr15 | 22980090  | 22980178  |
| CNV | NM_014608    | CYFIP1  | chr15 | 22990056  | 22990200  |
| CNV | NM_014608    | CYFIP1  | chr15 | 22991131  | 22991222  |
| CNV | NM_014608    | CYFIP1  | chr15 | 22993024  | 22993155  |
| CNV | NM_014608    | CYFIP1  | chr15 | 22997796  | 22997869  |
| CNV | NM_014608    | CYFIP1  | chr15 | 22998423  | 22998518  |
| CNV | NM_014608    | CYFIP1  | chr15 | 22999338  | 22999577  |
| CNV | NM_014608    | CYFIP1  | chr15 | 23000095  | 23000243  |
| CNV | NM_014608    | CYFIP1  | chr15 | 23002875  | 23003603  |
| SMG | NM_000104    | CYP1B1  | chr2  | 38294745  | 38298453  |
| SMG | NM_000104    | CYP1B1  | chr2  | 38301488  | 38302532  |
| SMG | NM_000104    | CYP1B1  | chr2  | 38302922  | 38303323  |
| SMG | NM_000785    | CYP27B1 | chr12 | 58156116  | 58157038  |

|     |              |           |       |           |           |
|-----|--------------|-----------|-------|-----------|-----------|
| SMG | NM_000785    | CYP27B1   | chr12 | 58157393  | 58157591  |
| SMG | NM_000785    | CYP27B1   | chr12 | 58157880  | 58157959  |
| SMG | NM_000785    | CYP27B1   | chr12 | 58158160  | 58158333  |
| SMG | NM_000785    | CYP27B1   | chr12 | 58158536  | 58158709  |
| SMG | NM_000785    | CYP27B1   | chr12 | 58158793  | 58158994  |
| SMG | NM_000785    | CYP27B1   | chr12 | 58159079  | 58159282  |
| SMG | NM_000785    | CYP27B1   | chr12 | 58159789  | 58159980  |
| SMG | NM_000785    | CYP27B1   | chr12 | 58160629  | 58160976  |
| CNV | NM_001001665 | CYP27C1   | chr2  | 127941411 | 127944963 |
| CNV | NM_001001665 | CYP27C1   | chr2  | 127950669 | 127950873 |
| CNV | NM_001001665 | CYP27C1   | chr2  | 127951364 | 127951443 |
| CNV | NM_001001665 | CYP27C1   | chr2  | 127952910 | 127953077 |
| CNV | NM_001001665 | CYP27C1   | chr2  | 127956951 | 127957115 |
| CNV | NM_001001665 | CYP27C1   | chr2  | 127958697 | 127958907 |
| CNV | NM_001001665 | CYP27C1   | chr2  | 127960947 | 127961147 |
| CNV | NM_001001665 | CYP27C1   | chr2  | 127963234 | 127963343 |
| SMG | NM_000765    | CYP3A7    | chr7  | 99302659  | 99303218  |
| SMG | NM_000765    | CYP3A7    | chr7  | 99305434  | 99305597  |
| SMG | NM_000765    | CYP3A7    | chr7  | 99306657  | 99306884  |
| SMG | NM_000765    | CYP3A7    | chr7  | 99308354  | 99308515  |
| SMG | NM_000765    | CYP3A7    | chr7  | 99311091  | 99311158  |
| SMG | NM_000765    | CYP3A7    | chr7  | 99312177  | 99312305  |
| SMG | NM_000765    | CYP3A7    | chr7  | 99313380  | 99313529  |
| SMG | NM_000765    | CYP3A7    | chr7  | 99314799  | 99314888  |
| SMG | NM_000765    | CYP3A7    | chr7  | 99315148  | 99315262  |
| SMG | NM_000765    | CYP3A7    | chr7  | 99317935  | 99318035  |
| SMG | NM_000765    | CYP3A7    | chr7  | 99319918  | 99319971  |
| SMG | NM_000765    | CYP3A7    | chr7  | 99328681  | 99328775  |
| SMG | NM_000765    | CYP3A7    | chr7  | 99332645  | 99332819  |
| CNV | NM_000780    | CYP7A1    | chr8  | 59402736  | 59404333  |
| CNV | NM_000780    | CYP7A1    | chr8  | 59404911  | 59405087  |
| CNV | NM_000780    | CYP7A1    | chr8  | 59407064  | 59407195  |
| CNV | NM_000780    | CYP7A1    | chr8  | 59409162  | 59409749  |
| CNV | NM_000780    | CYP7A1    | chr8  | 59410787  | 59411028  |
| CNV | NM_000780    | CYP7A1    | chr8  | 59412577  | 59412720  |
| CNV | NM_004820    | CYP7B1    | chr8  | 65508528  | 65509486  |
| CNV | NM_004820    | CYP7B1    | chr8  | 65517238  | 65517414  |
| CNV | NM_004820    | CYP7B1    | chr8  | 65527582  | 65527789  |
| CNV | NM_004820    | CYP7B1    | chr8  | 65528247  | 65528838  |
| CNV | NM_004820    | CYP7B1    | chr8  | 65536959  | 65537096  |
| CNV | NM_004820    | CYP7B1    | chr8  | 65711022  | 65711348  |
| CNV | NR_040254    | D21S2088E | chr21 | 24733425  | 24734561  |
| CNV | NR_040254    | D21S2088E | chr21 | 24736359  | 24736515  |

|     |              |           |       |           |           |
|-----|--------------|-----------|-------|-----------|-----------|
| CNV | NR_040254    | D21S2088E | chr21 | 24744648  | 24744770  |
| CNV | NR_040254    | D21S2088E | chr21 | 24745269  | 24745406  |
| CNV | NR_040254    | D21S2088E | chr21 | 24757008  | 24757156  |
| CNV | EST_DA427929 | DA427929  | chr2  | 199417919 | 199418262 |
| CNV | EST_DA427929 | DA427929  | chr2  | 199444371 | 199444432 |
| CNV | EST_DA427929 | DA427929  | chr2  | 199636983 | 199637080 |
| CNV | NM_080760    | DACH1     | chr13 | 72012097  | 72014824  |
| CNV | NM_080760    | DACH1     | chr13 | 72049272  | 72049341  |
| CNV | NM_080760    | DACH1     | chr13 | 72049837  | 72049981  |
| CNV | NM_080760    | DACH1     | chr13 | 72053300  | 72053448  |
| CNV | NM_080760    | DACH1     | chr13 | 72063128  | 72063280  |
| CNV | NM_080760    | DACH1     | chr13 | 72204687  | 72204849  |
| CNV | NM_080760    | DACH1     | chr13 | 72255926  | 72256042  |
| CNV | NM_080760    | DACH1     | chr13 | 72440053  | 72441330  |
| SMG | NM_000787    | DBH       | chr9  | 136501484 | 136501832 |
| SMG | NM_000787    | DBH       | chr9  | 136504967 | 136505114 |
| SMG | NM_000787    | DBH       | chr9  | 136507328 | 136507586 |
| SMG | NM_000787    | DBH       | chr9  | 136508534 | 136508711 |
| SMG | NM_000787    | DBH       | chr9  | 136509339 | 136509442 |
| SMG | NM_000787    | DBH       | chr9  | 136512967 | 136513134 |
| SMG | NM_000787    | DBH       | chr9  | 136516755 | 136516899 |
| SMG | NM_000787    | DBH       | chr9  | 136517367 | 136517406 |
| SMG | NM_000787    | DBH       | chr9  | 136518061 | 136518121 |
| SMG | NM_000787    | DBH       | chr9  | 136521644 | 136521772 |
| SMG | NM_000787    | DBH       | chr9  | 136522191 | 136522351 |
| SMG | NM_000787    | DBH       | chr9  | 136523437 | 136524466 |
| SMG | NM_001012732 | DCTD      | chr4  | 183811243 | 183812630 |
| SMG | NM_001012732 | DCTD      | chr4  | 183814183 | 183814280 |
| SMG | NM_001012732 | DCTD      | chr4  | 183815641 | 183815758 |
| SMG | NM_001012732 | DCTD      | chr4  | 183836075 | 183836211 |
| SMG | NM_001012732 | DCTD      | chr4  | 183836613 | 183836728 |
| SMG | NM_001012732 | DCTD      | chr4  | 183838440 | 183838630 |
| CNV | NM_153289    | DEFB119   | chr20 | 29964965  | 29965242  |
| CNV | NM_153289    | DEFB119   | chr20 | 29978225  | 29978452  |
| SMG | NM_152678    | DENND6A   | chr3  | 57611180  | 57614072  |
| SMG | NM_152678    | DENND6A   | chr3  | 57614537  | 57614612  |
| SMG | NM_152678    | DENND6A   | chr3  | 57616147  | 57616250  |
| SMG | NM_152678    | DENND6A   | chr3  | 57616441  | 57616551  |
| SMG | NM_152678    | DENND6A   | chr3  | 57616651  | 57616705  |
| SMG | NM_152678    | DENND6A   | chr3  | 57618991  | 57619081  |
| SMG | NM_152678    | DENND6A   | chr3  | 57620284  | 57620349  |
| SMG | NM_152678    | DENND6A   | chr3  | 57620430  | 57620496  |
| SMG | NM_152678    | DENND6A   | chr3  | 57627379  | 57627474  |

|     |              |         |       |           |           |
|-----|--------------|---------|-------|-----------|-----------|
| SMG | NM_152678    | DENND6A | chr3  | 57631387  | 57631483  |
| SMG | NM_152678    | DENND6A | chr3  | 57632042  | 57632165  |
| SMG | NM_152678    | DENND6A | chr3  | 57643406  | 57643462  |
| SMG | NM_152678    | DENND6A | chr3  | 57644844  | 57644907  |
| SMG | NM_152678    | DENND6A | chr3  | 57646486  | 57646566  |
| SMG | NM_152678    | DENND6A | chr3  | 57647172  | 57647278  |
| SMG | NM_152678    | DENND6A | chr3  | 57649362  | 57649443  |
| SMG | NM_152678    | DENND6A | chr3  | 57651849  | 57651962  |
| SMG | NM_152678    | DENND6A | chr3  | 57657982  | 57658025  |
| SMG | NM_152678    | DENND6A | chr3  | 57658126  | 57658165  |
| SMG | NM_152678    | DENND6A | chr3  | 57678508  | 57678816  |
| SMG | NM_016076    | DESI2   | chr1  | 244816351 | 244816657 |
| SMG | NM_016076    | DESI2   | chr1  | 244849898 | 244849971 |
| SMG | NM_016076    | DESI2   | chr1  | 244852550 | 244852644 |
| SMG | NM_016076    | DESI2   | chr1  | 244855180 | 244855322 |
| SMG | NM_016076    | DESI2   | chr1  | 244868857 | 244872334 |
| CNV | NM_001258366 | DIAPH3  | chr13 | 60239720  | 60240980  |
| CNV | NM_001258366 | DIAPH3  | chr13 | 60348322  | 60348382  |
| CNV | NM_001258366 | DIAPH3  | chr13 | 60348861  | 60348957  |
| CNV | NM_001258366 | DIAPH3  | chr13 | 60384921  | 60385057  |
| CNV | NM_001258366 | DIAPH3  | chr13 | 60407240  | 60407405  |
| CNV | NM_001258366 | DIAPH3  | chr13 | 60413457  | 60413582  |
| CNV | NM_001258366 | DIAPH3  | chr13 | 60435540  | 60435670  |
| CNV | NM_001258366 | DIAPH3  | chr13 | 60453362  | 60453602  |
| CNV | NM_001258366 | DIAPH3  | chr13 | 60485868  | 60485970  |
| CNV | NM_001258366 | DIAPH3  | chr13 | 60490288  | 60490383  |
| CNV | NM_001258366 | DIAPH3  | chr13 | 60498908  | 60499004  |
| CNV | NM_001258366 | DIAPH3  | chr13 | 60544077  | 60544192  |
| CNV | NM_001258366 | DIAPH3  | chr13 | 60544985  | 60545294  |
| CNV | NM_001258366 | DIAPH3  | chr13 | 60548485  | 60548590  |
| CNV | NM_001258366 | DIAPH3  | chr13 | 60554928  | 60554993  |
| CNV | NM_001258366 | DIAPH3  | chr13 | 60557902  | 60558021  |
| CNV | NM_001258366 | DIAPH3  | chr13 | 60565291  | 60565408  |
| CNV | NM_001258366 | DIAPH3  | chr13 | 60566201  | 60566320  |
| CNV | NM_001258366 | DIAPH3  | chr13 | 60566606  | 60566717  |
| CNV | NM_001258366 | DIAPH3  | chr13 | 60582677  | 60582783  |
| CNV | NM_001258366 | DIAPH3  | chr13 | 60584666  | 60584803  |
| CNV | NM_001258366 | DIAPH3  | chr13 | 60590046  | 60590116  |
| CNV | NM_001258366 | DIAPH3  | chr13 | 60590204  | 60590279  |
| CNV | NM_001258366 | DIAPH3  | chr13 | 60616823  | 60616954  |
| CNV | NM_001258366 | DIAPH3  | chr13 | 60667761  | 60667866  |
| CNV | NM_001258366 | DIAPH3  | chr13 | 60686143  | 60686320  |
| CNV | NM_001258366 | DIAPH3  | chr13 | 60737720  | 60738119  |

|     |              |        |       |           |           |
|-----|--------------|--------|-------|-----------|-----------|
| SMG | NM_014421    | DKK2   | chr4  | 107842958 | 107845361 |
| SMG | NM_014421    | DKK2   | chr4  | 107845701 | 107845857 |
| SMG | NM_014421    | DKK2   | chr4  | 107846955 | 107847106 |
| SMG | NM_014421    | DKK2   | chr4  | 107956526 | 107957453 |
| SMG | NM_014420    | DKK4   | chr8  | 42231585  | 42231877  |
| SMG | NM_014420    | DKK4   | chr8  | 42232278  | 42232431  |
| SMG | NM_014420    | DKK4   | chr8  | 42233197  | 42233348  |
| SMG | NM_014420    | DKK4   | chr8  | 42234452  | 42234674  |
| CNV | NM_004747    | DLG5   | chr10 | 79550548  | 79552301  |
| CNV | NM_004747    | DLG5   | chr10 | 79553765  | 79553875  |
| CNV | NM_004747    | DLG5   | chr10 | 79554606  | 79554716  |
| CNV | NM_004747    | DLG5   | chr10 | 79555818  | 79555946  |
| CNV | NM_004747    | DLG5   | chr10 | 79556208  | 79556352  |
| CNV | NM_004747    | DLG5   | chr10 | 79565422  | 79565619  |
| CNV | NM_004747    | DLG5   | chr10 | 79566515  | 79566686  |
| CNV | NM_004747    | DLG5   | chr10 | 79567553  | 79567702  |
| CNV | NM_004747    | DLG5   | chr10 | 79569304  | 79569488  |
| CNV | NM_004747    | DLG5   | chr10 | 79570851  | 79570992  |
| CNV | NM_004747    | DLG5   | chr10 | 79571681  | 79571815  |
| CNV | NM_004747    | DLG5   | chr10 | 79571972  | 79572135  |
| CNV | NM_004747    | DLG5   | chr10 | 79576308  | 79576459  |
| CNV | NM_004747    | DLG5   | chr10 | 79576764  | 79576854  |
| CNV | NM_004747    | DLG5   | chr10 | 79577534  | 79577647  |
| CNV | NM_004747    | DLG5   | chr10 | 79579078  | 79579223  |
| CNV | NM_004747    | DLG5   | chr10 | 79579652  | 79579776  |
| CNV | NM_004747    | DLG5   | chr10 | 79580839  | 79581859  |
| CNV | NM_004747    | DLG5   | chr10 | 79584141  | 79584234  |
| CNV | NM_004747    | DLG5   | chr10 | 79588639  | 79588743  |
| CNV | NM_004747    | DLG5   | chr10 | 79589112  | 79589288  |
| CNV | NM_004747    | DLG5   | chr10 | 79589974  | 79590102  |
| CNV | NM_004747    | DLG5   | chr10 | 79590498  | 79590631  |
| CNV | NM_004747    | DLG5   | chr10 | 79593671  | 79593797  |
| CNV | NM_004747    | DLG5   | chr10 | 79595495  | 79595680  |
| CNV | NM_004747    | DLG5   | chr10 | 79601638  | 79601951  |
| CNV | NM_004747    | DLG5   | chr10 | 79603204  | 79603464  |
| CNV | NM_004747    | DLG5   | chr10 | 79613111  | 79613295  |
| CNV | NM_004747    | DLG5   | chr10 | 79613984  | 79614128  |
| CNV | NM_004747    | DLG5   | chr10 | 79616487  | 79616650  |
| CNV | NM_004747    | DLG5   | chr10 | 79628886  | 79628955  |
| CNV | NM_004747    | DLG5   | chr10 | 79685974  | 79686348  |
| CNV | NM_001277161 | DLGAP2 | chr8  | 1449531   | 1449597   |
| CNV | NM_001277161 | DLGAP2 | chr8  | 1496791   | 1497849   |
| CNV | NM_001277161 | DLGAP2 | chr8  | 1513848   | 1514060   |



|     |              |         |      |           |           |
|-----|--------------|---------|------|-----------|-----------|
| CNV | NM_001277161 | DLGAP2  | chr8 | 1574905   | 1575053   |
| CNV | NM_001277161 | DLGAP2  | chr8 | 1580992   | 1581212   |
| CNV | NM_001277161 | DLGAP2  | chr8 | 1616494   | 1616844   |
| CNV | NM_001277161 | DLGAP2  | chr8 | 1624698   | 1624784   |
| CNV | NM_001277161 | DLGAP2  | chr8 | 1626379   | 1626795   |
| CNV | NM_001277161 | DLGAP2  | chr8 | 1639700   | 1639792   |
| CNV | NM_001277161 | DLGAP2  | chr8 | 1645312   | 1645465   |
| CNV | NM_001277161 | DLGAP2  | chr8 | 1649353   | 1656642   |
| SMG | NM_018198    | DNAJC11 | chr1 | 6694227   | 6695760   |
| SMG | NM_018198    | DNAJC11 | chr1 | 6696176   | 6696306   |
| SMG | NM_018198    | DNAJC11 | chr1 | 6697257   | 6697400   |
| SMG | NM_018198    | DNAJC11 | chr1 | 6697506   | 6697564   |
| SMG | NM_018198    | DNAJC11 | chr1 | 6698354   | 6698424   |
| SMG | NM_018198    | DNAJC11 | chr1 | 6699961   | 6700117   |
| SMG | NM_018198    | DNAJC11 | chr1 | 6704617   | 6704734   |
| SMG | NM_018198    | DNAJC11 | chr1 | 6705100   | 6705186   |
| SMG | NM_018198    | DNAJC11 | chr1 | 6705848   | 6706038   |
| SMG | NM_018198    | DNAJC11 | chr1 | 6711588   | 6711662   |
| SMG | NM_018198    | DNAJC11 | chr1 | 6712888   | 6713011   |
| SMG | NM_018198    | DNAJC11 | chr1 | 6713970   | 6714099   |
| SMG | NM_018198    | DNAJC11 | chr1 | 6727768   | 6727870   |
| SMG | NM_018198    | DNAJC11 | chr1 | 6738453   | 6738527   |
| SMG | NM_018198    | DNAJC11 | chr1 | 6740967   | 6741097   |
| SMG | NM_018198    | DNAJC11 | chr1 | 6761788   | 6761966   |
| SMG | NM_033105    | DNAJC5B | chr8 | 66933790  | 66933940  |
| SMG | NM_033105    | DNAJC5B | chr8 | 66955722  | 66955846  |
| SMG | NM_033105    | DNAJC5B | chr8 | 66963765  | 66963901  |
| SMG | NM_033105    | DNAJC5B | chr8 | 66988894  | 66989108  |
| SMG | NM_033105    | DNAJC5B | chr8 | 66992611  | 66992783  |
| SMG | NM_033105    | DNAJC5B | chr8 | 67012171  | 67012755  |
| SMG | NM_139072    | DNER    | chr2 | 230222344 | 230223367 |
| SMG | NM_139072    | DNER    | chr2 | 230231588 | 230231835 |
| SMG | NM_139072    | DNER    | chr2 | 230252980 | 230253112 |
| SMG | NM_139072    | DNER    | chr2 | 230271947 | 230272061 |
| SMG | NM_139072    | DNER    | chr2 | 230282823 | 230282946 |
| SMG | NM_139072    | DNER    | chr2 | 230312031 | 230312256 |
| SMG | NM_139072    | DNER    | chr2 | 230341855 | 230341969 |
| SMG | NM_139072    | DNER    | chr2 | 230377498 | 230377652 |
| SMG | NM_139072    | DNER    | chr2 | 230411662 | 230411808 |
| SMG | NM_139072    | DNER    | chr2 | 230450573 | 230450740 |
| SMG | NM_139072    | DNER    | chr2 | 230453109 | 230453204 |
| SMG | NM_139072    | DNER    | chr2 | 230456295 | 230456604 |
| SMG | NM_139072    | DNER    | chr2 | 230578863 | 230579286 |

|     |              |       |       |          |          |
|-----|--------------|-------|-------|----------|----------|
| DRV | NM_001130823 | DNMT1 | chr19 | 10244021 | 10244377 |
| DRV | NM_001130823 | DNMT1 | chr19 | 10244892 | 10244983 |
| DRV | NM_001130823 | DNMT1 | chr19 | 10246411 | 10246528 |
| DRV | NM_001130823 | DNMT1 | chr19 | 10246796 | 10246963 |
| DRV | NM_001130823 | DNMT1 | chr19 | 10247760 | 10247956 |
| DRV | NM_001130823 | DNMT1 | chr19 | 10248507 | 10248685 |
| DRV | NM_001130823 | DNMT1 | chr19 | 10249114 | 10249281 |
| DRV | NM_001130823 | DNMT1 | chr19 | 10250351 | 10250493 |
| DRV | NM_001130823 | DNMT1 | chr19 | 10250721 | 10251004 |
| DRV | NM_001130823 | DNMT1 | chr19 | 10251456 | 10251585 |
| DRV | NM_001130823 | DNMT1 | chr19 | 10251780 | 10251865 |
| DRV | NM_001130823 | DNMT1 | chr19 | 10252703 | 10252896 |
| DRV | NM_001130823 | DNMT1 | chr19 | 10254441 | 10254663 |
| DRV | NM_001130823 | DNMT1 | chr19 | 10257026 | 10257200 |
| DRV | NM_001130823 | DNMT1 | chr19 | 10259559 | 10259693 |
| DRV | NM_001130823 | DNMT1 | chr19 | 10260128 | 10260333 |
| DRV | NM_001130823 | DNMT1 | chr19 | 10260528 | 10260644 |
| DRV | NM_001130823 | DNMT1 | chr19 | 10262073 | 10262221 |
| DRV | NM_001130823 | DNMT1 | chr19 | 10262425 | 10262523 |
| DRV | NM_001130823 | DNMT1 | chr19 | 10264968 | 10265155 |
| DRV | NM_001130823 | DNMT1 | chr19 | 10265261 | 10265449 |
| DRV | NM_001130823 | DNMT1 | chr19 | 10265580 | 10265732 |
| DRV | NM_001130823 | DNMT1 | chr19 | 10266528 | 10266621 |
| DRV | NM_001130823 | DNMT1 | chr19 | 10267066 | 10267185 |
| DRV | NM_001130823 | DNMT1 | chr19 | 10270333 | 10270443 |
| DRV | NM_001130823 | DNMT1 | chr19 | 10270517 | 10270598 |
| DRV | NM_001130823 | DNMT1 | chr19 | 10270693 | 10270739 |
| DRV | NM_001130823 | DNMT1 | chr19 | 10271059 | 10271094 |
| DRV | NM_001130823 | DNMT1 | chr19 | 10273342 | 10273424 |
| DRV | NM_001130823 | DNMT1 | chr19 | 10274001 | 10274036 |
| DRV | NM_001130823 | DNMT1 | chr19 | 10277273 | 10277361 |
| DRV | NM_001130823 | DNMT1 | chr19 | 10279005 | 10279040 |
| DRV | NM_001130823 | DNMT1 | chr19 | 10283765 | 10283850 |
| DRV | NM_001130823 | DNMT1 | chr19 | 10284546 | 10284581 |
| DRV | NM_001130823 | DNMT1 | chr19 | 10286215 | 10286294 |
| DRV | NM_001130823 | DNMT1 | chr19 | 10287967 | 10288043 |
| DRV | NM_001130823 | DNMT1 | chr19 | 10290862 | 10290910 |
| DRV | NM_001130823 | DNMT1 | chr19 | 10291025 | 10291245 |
| DRV | NM_001130823 | DNMT1 | chr19 | 10291453 | 10291561 |
| DRV | NM_001130823 | DNMT1 | chr19 | 10292716 | 10292753 |
| DRV | NM_001130823 | DNMT1 | chr19 | 10305495 | 10305755 |
| SMG | NM_018431    | DOK5  | chr20 | 53092265 | 53092551 |
| SMG | NM_018431    | DOK5  | chr20 | 53171471 | 53171579 |

|     |              |         |       |          |          |
|-----|--------------|---------|-------|----------|----------|
| SMG | NM_018431    | DOK5    | chr20 | 53205021 | 53205136 |
| SMG | NM_018431    | DOK5    | chr20 | 53205225 | 53205345 |
| SMG | NM_018431    | DOK5    | chr20 | 53208154 | 53208344 |
| SMG | NM_018431    | DOK5    | chr20 | 53226926 | 53227062 |
| SMG | NM_018431    | DOK5    | chr20 | 53259996 | 53260117 |
| SMG | NM_018431    | DOK5    | chr20 | 53266953 | 53267710 |
| SMG | NM_006268    | DPF2    | chr11 | 65101224 | 65101389 |
| SMG | NM_006268    | DPF2    | chr11 | 65107855 | 65108016 |
| SMG | NM_006268    | DPF2    | chr11 | 65108436 | 65108544 |
| SMG | NM_006268    | DPF2    | chr11 | 65108869 | 65109033 |
| SMG | NM_006268    | DPF2    | chr11 | 65111215 | 65111308 |
| SMG | NM_006268    | DPF2    | chr11 | 65111461 | 65111540 |
| SMG | NM_006268    | DPF2    | chr11 | 65113136 | 65113274 |
| SMG | NM_006268    | DPF2    | chr11 | 65113400 | 65113529 |
| SMG | NM_006268    | DPF2    | chr11 | 65113717 | 65113830 |
| SMG | NM_006268    | DPF2    | chr11 | 65116320 | 65116402 |
| SMG | NM_006268    | DPF2    | chr11 | 65119153 | 65120451 |
| SMG | NM_015283    | DPY19L1 | chr7  | 34968492 | 34971341 |
| SMG | NM_015283    | DPY19L1 | chr7  | 34977605 | 34977731 |
| SMG | NM_015283    | DPY19L1 | chr7  | 34978887 | 34978987 |
| SMG | NM_015283    | DPY19L1 | chr7  | 34979764 | 34979939 |
| SMG | NM_015283    | DPY19L1 | chr7  | 34981376 | 34981496 |
| SMG | NM_015283    | DPY19L1 | chr7  | 34982226 | 34982251 |
| SMG | NM_015283    | DPY19L1 | chr7  | 34985278 | 34985328 |
| SMG | NM_015283    | DPY19L1 | chr7  | 34987241 | 34987313 |
| SMG | NM_015283    | DPY19L1 | chr7  | 34989408 | 34989510 |
| SMG | NM_015283    | DPY19L1 | chr7  | 34994309 | 34994390 |
| SMG | NM_015283    | DPY19L1 | chr7  | 34994919 | 34994979 |
| SMG | NM_015283    | DPY19L1 | chr7  | 34997595 | 34997682 |
| SMG | NM_015283    | DPY19L1 | chr7  | 35006505 | 35006583 |
| SMG | NM_015283    | DPY19L1 | chr7  | 35009044 | 35009144 |
| SMG | NM_015283    | DPY19L1 | chr7  | 35013125 | 35013217 |
| SMG | NM_015283    | DPY19L1 | chr7  | 35029495 | 35029553 |
| SMG | NM_015283    | DPY19L1 | chr7  | 35050079 | 35050173 |
| SMG | NM_015283    | DPY19L1 | chr7  | 35050941 | 35051062 |
| SMG | NM_015283    | DPY19L1 | chr7  | 35053179 | 35053317 |
| SMG | NM_015283    | DPY19L1 | chr7  | 35057493 | 35057581 |
| SMG | NM_015283    | DPY19L1 | chr7  | 35058183 | 35058208 |
| SMG | NM_015283    | DPY19L1 | chr7  | 35077429 | 35077653 |
| CNV | NM_001172774 | DPY19L3 | chr19 | 32896654 | 32896815 |
| CNV | NM_001172774 | DPY19L3 | chr19 | 32899122 | 32899262 |
| CNV | NM_001172774 | DPY19L3 | chr19 | 32902144 | 32902278 |
| CNV | NM_001172774 | DPY19L3 | chr19 | 32923621 | 32923712 |

|     |              |         |       |          |          |
|-----|--------------|---------|-------|----------|----------|
| CNV | NM_001172774 | DPY19L3 | chr19 | 32927351 | 32927473 |
| CNV | NM_001172774 | DPY19L3 | chr19 | 32928099 | 32928245 |
| CNV | NM_001172774 | DPY19L3 | chr19 | 32930017 | 32930141 |
| CNV | NM_001172774 | DPY19L3 | chr19 | 32930681 | 32930816 |
| CNV | NM_001172774 | DPY19L3 | chr19 | 32944050 | 32944182 |
| CNV | NM_001172774 | DPY19L3 | chr19 | 32945844 | 32945946 |
| CNV | NM_001172774 | DPY19L3 | chr19 | 32949005 | 32949079 |
| CNV | NM_001172774 | DPY19L3 | chr19 | 32949256 | 32949415 |
| CNV | NM_001172774 | DPY19L3 | chr19 | 32954271 | 32954394 |
| CNV | NM_001172774 | DPY19L3 | chr19 | 32954774 | 32954886 |
| CNV | NM_001172774 | DPY19L3 | chr19 | 32955633 | 32955690 |
| CNV | NM_001172774 | DPY19L3 | chr19 | 32959636 | 32959719 |
| CNV | NM_001172774 | DPY19L3 | chr19 | 32968427 | 32968560 |
| CNV | NM_001172774 | DPY19L3 | chr19 | 32971304 | 32971463 |
| CNV | NM_001172774 | DPY19L3 | chr19 | 32972984 | 32976799 |
| CNV | NM_001100412 | DROSHA  | chr5  | 31400601 | 31401669 |
| CNV | NM_001100412 | DROSHA  | chr5  | 31405783 | 31405830 |
| CNV | NM_001100412 | DROSHA  | chr5  | 31406959 | 31407052 |
| CNV | NM_001100412 | DROSHA  | chr5  | 31409162 | 31409266 |
| CNV | NM_001100412 | DROSHA  | chr5  | 31409356 | 31409439 |
| CNV | NM_001100412 | DROSHA  | chr5  | 31410852 | 31410994 |
| CNV | NM_001100412 | DROSHA  | chr5  | 31421378 | 31421484 |
| CNV | NM_001100412 | DROSHA  | chr5  | 31422893 | 31423051 |
| CNV | NM_001100412 | DROSHA  | chr5  | 31424533 | 31424578 |
| CNV | NM_001100412 | DROSHA  | chr5  | 31429581 | 31429652 |
| CNV | NM_001100412 | DROSHA  | chr5  | 31431682 | 31431785 |
| CNV | NM_001100412 | DROSHA  | chr5  | 31435871 | 31435971 |
| CNV | NM_001100412 | DROSHA  | chr5  | 31437345 | 31437405 |
| CNV | NM_001100412 | DROSHA  | chr5  | 31448653 | 31448714 |
| CNV | NM_001100412 | DROSHA  | chr5  | 31449387 | 31449526 |
| CNV | NM_001100412 | DROSHA  | chr5  | 31451639 | 31451747 |
| CNV | NM_001100412 | DROSHA  | chr5  | 31464342 | 31464450 |
| CNV | NM_001100412 | DROSHA  | chr5  | 31466288 | 31466388 |
| CNV | NM_001100412 | DROSHA  | chr5  | 31468045 | 31468170 |
| CNV | NM_001100412 | DROSHA  | chr5  | 31472169 | 31472339 |
| CNV | NM_001100412 | DROSHA  | chr5  | 31483660 | 31483735 |
| CNV | NM_001100412 | DROSHA  | chr5  | 31484987 | 31485069 |
| CNV | NM_001100412 | DROSHA  | chr5  | 31486597 | 31486669 |
| CNV | NM_001100412 | DROSHA  | chr5  | 31493313 | 31493400 |
| CNV | NM_001100412 | DROSHA  | chr5  | 31495392 | 31495479 |
| CNV | NM_001100412 | DROSHA  | chr5  | 31504661 | 31504742 |
| CNV | NM_001100412 | DROSHA  | chr5  | 31508727 | 31508882 |
| CNV | NM_001100412 | DROSHA  | chr5  | 31511141 | 31511283 |

|     |              |         |       |           |           |
|-----|--------------|---------|-------|-----------|-----------|
| CNV | NM_001100412 | DROSHA  | chr5  | 31515094  | 31515326  |
| CNV | NM_001100412 | DROSHA  | chr5  | 31521229  | 31521322  |
| CNV | NM_001100412 | DROSHA  | chr5  | 31526185  | 31527019  |
| CNV | NM_001100412 | DROSHA  | chr5  | 31529146  | 31529212  |
| CNV | NM_001100412 | DROSHA  | chr5  | 31530904  | 31531031  |
| CNV | NM_001100412 | DROSHA  | chr5  | 31531556  | 31531632  |
| CNV | NM_001100412 | DROSHA  | chr5  | 31532096  | 31532282  |
| SMG | NM_080664    | DTD2    | chr14 | 31915242  | 31917660  |
| SMG | NM_080664    | DTD2    | chr14 | 31922480  | 31922550  |
| SMG | NM_080664    | DTD2    | chr14 | 31926488  | 31926680  |
| SMG | NM_001946    | DUSP6   | chr12 | 89741836  | 89743338  |
| SMG | NM_001946    | DUSP6   | chr12 | 89744364  | 89744802  |
| SMG | NM_001946    | DUSP6   | chr12 | 89745416  | 89746296  |
| CNV | NM_001269053 | DYDC1   | chr10 | 82095860  | 82095941  |
| CNV | NM_001269053 | DYDC1   | chr10 | 82098222  | 82098327  |
| CNV | NM_001269053 | DYDC1   | chr10 | 82098852  | 82098909  |
| CNV | NM_001269053 | DYDC1   | chr10 | 82102024  | 82102117  |
| CNV | NM_001269053 | DYDC1   | chr10 | 82111656  | 82111758  |
| CNV | NM_001269053 | DYDC1   | chr10 | 82112210  | 82112366  |
| CNV | NM_001269053 | DYDC1   | chr10 | 82116467  | 82116514  |
| SMG | NM_130897    | DYNLRB2 | chr16 | 80574853  | 80574976  |
| SMG | NM_130897    | DYNLRB2 | chr16 | 80577172  | 80577248  |
| SMG | NM_130897    | DYNLRB2 | chr16 | 80583380  | 80583548  |
| SMG | NM_130897    | DYNLRB2 | chr16 | 80584411  | 80584541  |
| SMG | NM_001004023 | DYRK3   | chr1  | 206808880 | 206809125 |
| SMG | NM_001004023 | DYRK3   | chr1  | 206810219 | 206810313 |
| SMG | NM_001004023 | DYRK3   | chr1  | 206810994 | 206811106 |
| SMG | NM_001004023 | DYRK3   | chr1  | 206820732 | 206822542 |
| SMG | NM_004092    | ECHS1   | chr10 | 135175986 | 135176437 |
| SMG | NM_004092    | ECHS1   | chr10 | 135178161 | 135178229 |
| SMG | NM_004092    | ECHS1   | chr10 | 135179479 | 135179599 |
| SMG | NM_004092    | ECHS1   | chr10 | 135180392 | 135180497 |
| SMG | NM_004092    | ECHS1   | chr10 | 135182426 | 135182526 |
| SMG | NM_004092    | ECHS1   | chr10 | 135183407 | 135183535 |
| SMG | NM_004092    | ECHS1   | chr10 | 135184063 | 135184261 |
| SMG | NM_004092    | ECHS1   | chr10 | 135186749 | 135186908 |
| LIT | NM_000115    | EDNRB   | chr13 | 78469615  | 78472469  |
| LIT | NM_000115    | EDNRB   | chr13 | 78473993  | 78474102  |
| LIT | NM_000115    | EDNRB   | chr13 | 78474655  | 78474789  |
| LIT | NM_000115    | EDNRB   | chr13 | 78475192  | 78475342  |
| LIT | NM_000115    | EDNRB   | chr13 | 78477290  | 78477495  |
| LIT | NM_000115    | EDNRB   | chr13 | 78477629  | 78477742  |
| LIT | NM_000115    | EDNRB   | chr13 | 78492225  | 78492759  |

|     |              |        |       |           |           |
|-----|--------------|--------|-------|-----------|-----------|
| LIT | NM_000115    | EDNRB  | chr13 | 78549481  | 78549664  |
| CNV | NM_001142857 | EFCAB1 | chr8  | 49627473  | 49629093  |
| CNV | NM_001142857 | EFCAB1 | chr8  | 49637274  | 49637360  |
| CNV | NM_001142857 | EFCAB1 | chr8  | 49641600  | 49641705  |
| CNV | NM_001142857 | EFCAB1 | chr8  | 49642278  | 49642430  |
| CNV | NM_001142857 | EFCAB1 | chr8  | 49643098  | 49643203  |
| CNV | NM_001142857 | EFCAB1 | chr8  | 49647652  | 49647870  |
| SMG | NM_018100    | EFHC1  | chr6  | 52284993  | 52285271  |
| SMG | NM_018100    | EFHC1  | chr6  | 52288743  | 52288965  |
| SMG | NM_018100    | EFHC1  | chr6  | 52303101  | 52303389  |
| SMG | NM_018100    | EFHC1  | chr6  | 52317485  | 52317635  |
| SMG | NM_018100    | EFHC1  | chr6  | 52318892  | 52319085  |
| SMG | NM_018100    | EFHC1  | chr6  | 52329692  | 52329913  |
| SMG | NM_018100    | EFHC1  | chr6  | 52334130  | 52334271  |
| SMG | NM_018100    | EFHC1  | chr6  | 52343834  | 52344048  |
| SMG | NM_018100    | EFHC1  | chr6  | 52344437  | 52344585  |
| SMG | NM_018100    | EFHC1  | chr6  | 52354937  | 52355148  |
| SMG | NM_018100    | EFHC1  | chr6  | 52357067  | 52360583  |
| CNV | NM_001962    | EFNA5  | chr5  | 106712589 | 106717077 |
| CNV | NM_001962    | EFNA5  | chr5  | 106722935 | 106723016 |
| CNV | NM_001962    | EFNA5  | chr5  | 106723406 | 106723472 |
| CNV | NM_001962    | EFNA5  | chr5  | 106762917 | 106763210 |
| CNV | NM_001962    | EFNA5  | chr5  | 107006189 | 107006596 |
| SMG | NM_001167890 | EGFL6  | chrX  | 13587693  | 13588054  |
| SMG | NM_001167890 | EGFL6  | chrX  | 13607674  | 13607787  |
| SMG | NM_001167890 | EGFL6  | chrX  | 13612954  | 13613047  |
| SMG | NM_001167890 | EGFL6  | chrX  | 13618093  | 13618213  |
| SMG | NM_001167890 | EGFL6  | chrX  | 13621435  | 13621555  |
| SMG | NM_001167890 | EGFL6  | chrX  | 13624497  | 13624632  |
| SMG | NM_001167890 | EGFL6  | chrX  | 13626442  | 13626565  |
| SMG | NM_001167890 | EGFL6  | chrX  | 13635848  | 13636172  |
| SMG | NM_001167890 | EGFL6  | chrX  | 13637281  | 13637362  |
| SMG | NM_001167890 | EGFL6  | chrX  | 13641939  | 13642044  |
| SMG | NM_001167890 | EGFL6  | chrX  | 13645129  | 13645395  |
| SMG | NM_001167890 | EGFL6  | chrX  | 13651103  | 13651694  |
| CNV | NM_001205301 | EGFLAM | chr5  | 38258510  | 38258953  |
| CNV | NM_001205301 | EGFLAM | chr5  | 38337621  | 38337731  |
| CNV | NM_001205301 | EGFLAM | chr5  | 38338799  | 38338883  |
| CNV | NM_001205301 | EGFLAM | chr5  | 38350602  | 38350720  |
| CNV | NM_001205301 | EGFLAM | chr5  | 38352297  | 38352433  |
| CNV | NM_001205301 | EGFLAM | chr5  | 38370397  | 38370564  |
| CNV | NM_001205301 | EGFLAM | chr5  | 38406227  | 38406343  |
| CNV | NM_001205301 | EGFLAM | chr5  | 38406929  | 38407248  |

|     |              |        |      |          |          |
|-----|--------------|--------|------|----------|----------|
| CNV | NM_001205301 | EGFLAM | chr5 | 38407906 | 38408007 |
| CNV | NM_001205301 | EGFLAM | chr5 | 38409105 | 38409206 |
| CNV | NM_001205301 | EGFLAM | chr5 | 38412605 | 38412750 |
| CNV | NM_001205301 | EGFLAM | chr5 | 38418167 | 38418357 |
| CNV | NM_001205301 | EGFLAM | chr5 | 38425068 | 38425194 |
| CNV | NM_001205301 | EGFLAM | chr5 | 38427110 | 38427354 |
| CNV | NM_001205301 | EGFLAM | chr5 | 38431278 | 38431390 |
| CNV | NM_001205301 | EGFLAM | chr5 | 38435238 | 38435355 |
| CNV | NM_001205301 | EGFLAM | chr5 | 38438376 | 38438557 |
| CNV | NM_001205301 | EGFLAM | chr5 | 38445780 | 38445804 |
| CNV | NM_001205301 | EGFLAM | chr5 | 38448402 | 38448481 |
| CNV | NM_001205301 | EGFLAM | chr5 | 38451416 | 38451560 |
| CNV | NM_001205301 | EGFLAM | chr5 | 38458412 | 38458496 |
| CNV | NM_001205301 | EGFLAM | chr5 | 38463009 | 38463113 |
| CNV | NM_001205301 | EGFLAM | chr5 | 38463933 | 38465582 |
| DRV | NM_005228    | EGFR   | chr7 | 55086724 | 55087058 |
| DRV | NM_005228    | EGFR   | chr7 | 55209978 | 55210130 |
| DRV | NM_005228    | EGFR   | chr7 | 55210997 | 55211181 |
| DRV | NM_005228    | EGFR   | chr7 | 55214298 | 55214433 |
| DRV | NM_005228    | EGFR   | chr7 | 55218986 | 55219055 |
| DRV | NM_005228    | EGFR   | chr7 | 55220238 | 55220357 |
| DRV | NM_005228    | EGFR   | chr7 | 55221703 | 55221845 |
| DRV | NM_005228    | EGFR   | chr7 | 55223522 | 55223639 |
| DRV | NM_005228    | EGFR   | chr7 | 55224225 | 55224352 |
| DRV | NM_005228    | EGFR   | chr7 | 55224451 | 55224525 |
| DRV | NM_005228    | EGFR   | chr7 | 55225355 | 55225446 |
| DRV | NM_005228    | EGFR   | chr7 | 55227831 | 55228031 |
| DRV | NM_005228    | EGFR   | chr7 | 55229191 | 55229324 |
| DRV | NM_005228    | EGFR   | chr7 | 55231425 | 55231516 |
| DRV | NM_005228    | EGFR   | chr7 | 55232972 | 55233130 |
| DRV | NM_005228    | EGFR   | chr7 | 55238867 | 55238906 |
| DRV | NM_005228    | EGFR   | chr7 | 55240675 | 55240817 |
| DRV | NM_005228    | EGFR   | chr7 | 55241613 | 55241736 |
| DRV | NM_005228    | EGFR   | chr7 | 55242414 | 55242513 |
| DRV | NM_005228    | EGFR   | chr7 | 55248985 | 55249171 |
| DRV | NM_005228    | EGFR   | chr7 | 55259411 | 55259567 |
| DRV | NM_005228    | EGFR   | chr7 | 55260458 | 55260534 |
| DRV | NM_005228    | EGFR   | chr7 | 55266409 | 55266556 |
| DRV | NM_005228    | EGFR   | chr7 | 55268008 | 55268106 |
| DRV | NM_005228    | EGFR   | chr7 | 55268880 | 55269048 |
| DRV | NM_005228    | EGFR   | chr7 | 55269427 | 55269475 |
| DRV | NM_005228    | EGFR   | chr7 | 55270209 | 55270318 |
| DRV | NM_005228    | EGFR   | chr7 | 55272948 | 55275031 |

|     |              |       |       |           |           |
|-----|--------------|-------|-------|-----------|-----------|
| LIT | NM_003756    | EIF3H | chr8  | 117657054 | 117657342 |
| LIT | NM_003756    | EIF3H | chr8  | 117658709 | 117658842 |
| LIT | NM_003756    | EIF3H | chr8  | 117661044 | 117661165 |
| LIT | NM_003756    | EIF3H | chr8  | 117668094 | 117668244 |
| LIT | NM_003756    | EIF3H | chr8  | 117669453 | 117669553 |
| LIT | NM_003756    | EIF3H | chr8  | 117671051 | 117671219 |
| LIT | NM_003756    | EIF3H | chr8  | 117738254 | 117738411 |
| LIT | NM_003756    | EIF3H | chr8  | 117767904 | 117768062 |
| CNV | NM_172373    | ELF1  | chr13 | 41506054  | 41508164  |
| CNV | NM_172373    | ELF1  | chr13 | 41515056  | 41515506  |
| CNV | NM_172373    | ELF1  | chr13 | 41517087  | 41517280  |
| CNV | NM_172373    | ELF1  | chr13 | 41517977  | 41518061  |
| CNV | NM_172373    | ELF1  | chr13 | 41523941  | 41524109  |
| CNV | NM_172373    | ELF1  | chr13 | 41525464  | 41525572  |
| CNV | NM_172373    | ELF1  | chr13 | 41532971  | 41533152  |
| CNV | NM_172373    | ELF1  | chr13 | 41556118  | 41556418  |
| CNV | NM_172373    | ELF1  | chr13 | 41593363  | 41593508  |
| SMG | NM_001114309 | ELF3  | chr1  | 201979689 | 201979948 |
| SMG | NM_001114309 | ELF3  | chr1  | 201980256 | 201980427 |
| SMG | NM_001114309 | ELF3  | chr1  | 201981084 | 201981306 |
| SMG | NM_001114309 | ELF3  | chr1  | 201981471 | 201981564 |
| SMG | NM_001114309 | ELF3  | chr1  | 201981767 | 201981887 |
| SMG | NM_001114309 | ELF3  | chr1  | 201982074 | 201982164 |
| SMG | NM_001114309 | ELF3  | chr1  | 201982309 | 201982426 |
| SMG | NM_001114309 | ELF3  | chr1  | 201982956 | 201983152 |
| SMG | NM_001114309 | ELF3  | chr1  | 201984336 | 201986315 |
| LIT | NM_000118    | ENG   | chr9  | 130577290 | 130578332 |
| LIT | NM_000118    | ENG   | chr9  | 130579427 | 130579482 |
| LIT | NM_000118    | ENG   | chr9  | 130580398 | 130580656 |
| LIT | NM_000118    | ENG   | chr9  | 130580994 | 130581111 |
| LIT | NM_000118    | ENG   | chr9  | 130581900 | 130581939 |
| LIT | NM_000118    | ENG   | chr9  | 130582178 | 130582316 |
| LIT | NM_000118    | ENG   | chr9  | 130586582 | 130586725 |
| LIT | NM_000118    | ENG   | chr9  | 130587078 | 130587253 |
| LIT | NM_000118    | ENG   | chr9  | 130587509 | 130587636 |
| LIT | NM_000118    | ENG   | chr9  | 130587973 | 130588139 |
| LIT | NM_000118    | ENG   | chr9  | 130588788 | 130588951 |
| LIT | NM_000118    | ENG   | chr9  | 130591965 | 130592106 |
| LIT | NM_000118    | ENG   | chr9  | 130605372 | 130605524 |
| LIT | NM_000118    | ENG   | chr9  | 130616567 | 130617052 |
| CNV | NM_001242863 | ENOX1 | chr13 | 43787665  | 43788257  |
| CNV | NM_001242863 | ENOX1 | chr13 | 43798188  | 43798274  |
| CNV | NM_001242863 | ENOX1 | chr13 | 43810771  | 43810874  |



|     |              |       |       |          |          |
|-----|--------------|-------|-------|----------|----------|
| CNV | NM_001242863 | ENOX1 | chr13 | 43839533 | 43839590 |
| CNV | NM_001242863 | ENOX1 | chr13 | 43843605 | 43843713 |
| CNV | NM_001242863 | ENOX1 | chr13 | 43872481 | 43872666 |
| CNV | NM_001242863 | ENOX1 | chr13 | 43896519 | 43896637 |
| CNV | NM_001242863 | ENOX1 | chr13 | 43900554 | 43900661 |
| CNV | NM_001242863 | ENOX1 | chr13 | 43918673 | 43918886 |
| CNV | NM_001242863 | ENOX1 | chr13 | 43930054 | 43930288 |
| CNV | NM_001242863 | ENOX1 | chr13 | 43933986 | 43934193 |
| CNV | NM_001242863 | ENOX1 | chr13 | 43935414 | 43935588 |
| CNV | NM_001242863 | ENOX1 | chr13 | 43986051 | 43986189 |
| CNV | NM_001242863 | ENOX1 | chr13 | 43986980 | 43987124 |
| CNV | NM_001242863 | ENOX1 | chr13 | 44058144 | 44058288 |
| CNV | NM_001242863 | ENOX1 | chr13 | 44241603 | 44241680 |
| CNV | NM_001242863 | ENOX1 | chr13 | 44360787 | 44361116 |
| DRV | NM_001429    | EP300 | chr22 | 41488613 | 41489102 |
| DRV | NM_001429    | EP300 | chr22 | 41513190 | 41513825 |
| DRV | NM_001429    | EP300 | chr22 | 41521867 | 41522044 |
| DRV | NM_001429    | EP300 | chr22 | 41523490 | 41523752 |
| DRV | NM_001429    | EP300 | chr22 | 41525893 | 41526007 |
| DRV | NM_001429    | EP300 | chr22 | 41527391 | 41527637 |
| DRV | NM_001429    | EP300 | chr22 | 41531816 | 41531910 |
| DRV | NM_001429    | EP300 | chr22 | 41533656 | 41533794 |
| DRV | NM_001429    | EP300 | chr22 | 41536143 | 41536261 |
| DRV | NM_001429    | EP300 | chr22 | 41537051 | 41537226 |
| DRV | NM_001429    | EP300 | chr22 | 41542742 | 41542820 |
| DRV | NM_001429    | EP300 | chr22 | 41543840 | 41543950 |
| DRV | NM_001429    | EP300 | chr22 | 41545041 | 41545179 |
| DRV | NM_001429    | EP300 | chr22 | 41545764 | 41546202 |
| DRV | NM_001429    | EP300 | chr22 | 41547836 | 41548016 |
| DRV | NM_001429    | EP300 | chr22 | 41548209 | 41548354 |
| DRV | NM_001429    | EP300 | chr22 | 41550998 | 41551117 |
| DRV | NM_001429    | EP300 | chr22 | 41553172 | 41553412 |
| DRV | NM_001429    | EP300 | chr22 | 41554415 | 41554504 |
| DRV | NM_001429    | EP300 | chr22 | 41556645 | 41556726 |
| DRV | NM_001429    | EP300 | chr22 | 41558726 | 41558783 |
| DRV | NM_001429    | EP300 | chr22 | 41560056 | 41560134 |
| DRV | NM_001429    | EP300 | chr22 | 41562602 | 41562670 |
| DRV | NM_001429    | EP300 | chr22 | 41564452 | 41564603 |
| DRV | NM_001429    | EP300 | chr22 | 41564724 | 41564871 |
| DRV | NM_001429    | EP300 | chr22 | 41565506 | 41565620 |
| DRV | NM_001429    | EP300 | chr22 | 41566409 | 41566575 |
| DRV | NM_001429    | EP300 | chr22 | 41568502 | 41568667 |
| DRV | NM_001429    | EP300 | chr22 | 41569626 | 41569788 |

|     |              |       |       |           |           |
|-----|--------------|-------|-------|-----------|-----------|
| DRV | NM_001429    | EP300 | chr22 | 41572250  | 41572532  |
| DRV | NM_001429    | EP300 | chr22 | 41572776  | 41576081  |
| LIT | NM_002354    | EPCAM | chr2  | 47596286  | 47596720  |
| LIT | NM_002354    | EPCAM | chr2  | 47600601  | 47600709  |
| LIT | NM_002354    | EPCAM | chr2  | 47600946  | 47601187  |
| LIT | NM_002354    | EPCAM | chr2  | 47602372  | 47602438  |
| LIT | NM_002354    | EPCAM | chr2  | 47604152  | 47604216  |
| LIT | NM_002354    | EPCAM | chr2  | 47606091  | 47606193  |
| LIT | NM_002354    | EPCAM | chr2  | 47606907  | 47607108  |
| LIT | NM_002354    | EPCAM | chr2  | 47612304  | 47612349  |
| LIT | NM_002354    | EPCAM | chr2  | 47613710  | 47614167  |
| LIT | NM_005233    | EPHA3 | chr3  | 89156673  | 89156986  |
| LIT | NM_005233    | EPHA3 | chr3  | 89176358  | 89176423  |
| LIT | NM_005233    | EPHA3 | chr3  | 89259009  | 89259670  |
| LIT | NM_005233    | EPHA3 | chr3  | 89390065  | 89390221  |
| LIT | NM_005233    | EPHA3 | chr3  | 89390904  | 89391240  |
| LIT | NM_005233    | EPHA3 | chr3  | 89444986  | 89445111  |
| LIT | NM_005233    | EPHA3 | chr3  | 89448467  | 89448630  |
| LIT | NM_005233    | EPHA3 | chr3  | 89456418  | 89456521  |
| LIT | NM_005233    | EPHA3 | chr3  | 89457216  | 89457281  |
| LIT | NM_005233    | EPHA3 | chr3  | 89462290  | 89462416  |
| LIT | NM_005233    | EPHA3 | chr3  | 89468354  | 89468540  |
| LIT | NM_005233    | EPHA3 | chr3  | 89478255  | 89478317  |
| LIT | NM_005233    | EPHA3 | chr3  | 89480299  | 89480509  |
| LIT | NM_005233    | EPHA3 | chr3  | 89498374  | 89498524  |
| LIT | NM_005233    | EPHA3 | chr3  | 89499326  | 89499520  |
| LIT | NM_005233    | EPHA3 | chr3  | 89521613  | 89521769  |
| LIT | NM_005233    | EPHA3 | chr3  | 89528546  | 89531284  |
| LIT | NM_001280794 | EPHB6 | chr7  | 142552775 | 142553147 |
| LIT | NM_001280794 | EPHB6 | chr7  | 142558809 | 142558944 |
| LIT | NM_001280794 | EPHB6 | chr7  | 142559774 | 142559891 |
| LIT | NM_001280794 | EPHB6 | chr7  | 142560513 | 142560591 |
| LIT | NM_001280794 | EPHB6 | chr7  | 142560884 | 142561085 |
| LIT | NM_001280794 | EPHB6 | chr7  | 142561723 | 142562504 |
| LIT | NM_001280794 | EPHB6 | chr7  | 142563229 | 142563385 |
| LIT | NM_001280794 | EPHB6 | chr7  | 142563714 | 142564071 |
| LIT | NM_001280794 | EPHB6 | chr7  | 142564235 | 142564360 |
| LIT | NM_001280794 | EPHB6 | chr7  | 142564660 | 142564823 |
| LIT | NM_001280794 | EPHB6 | chr7  | 142565362 | 142565477 |
| LIT | NM_001280794 | EPHB6 | chr7  | 142565751 | 142565804 |
| LIT | NM_001280794 | EPHB6 | chr7  | 142565995 | 142566115 |
| LIT | NM_001280794 | EPHB6 | chr7  | 142566246 | 142566494 |
| LIT | NM_001280794 | EPHB6 | chr7  | 142566726 | 142566900 |

|     |              |       |       |           |           |
|-----|--------------|-------|-------|-----------|-----------|
| LIT | NM_001280794 | EPHB6 | chr7  | 142567569 | 142567719 |
| LIT | NM_001280794 | EPHB6 | chr7  | 142567966 | 142568160 |
| LIT | NM_001280794 | EPHB6 | chr7  | 142568282 | 142568438 |
| LIT | NM_001280794 | EPHB6 | chr7  | 142568548 | 142568847 |
| DRV | NM_001005862 | ERBB2 | chr17 | 37844392  | 37844531  |
| DRV | NM_001005862 | ERBB2 | chr17 | 37844948  | 37845053  |
| DRV | NM_001005862 | ERBB2 | chr17 | 37849513  | 37849578  |
| DRV | NM_001005862 | ERBB2 | chr17 | 37851240  | 37851434  |
| DRV | NM_001005862 | ERBB2 | chr17 | 37863242  | 37863394  |
| DRV | NM_001005862 | ERBB2 | chr17 | 37864573  | 37864787  |
| DRV | NM_001005862 | ERBB2 | chr17 | 37865570  | 37865705  |
| DRV | NM_001005862 | ERBB2 | chr17 | 37866065  | 37866134  |
| DRV | NM_001005862 | ERBB2 | chr17 | 37866338  | 37866454  |
| DRV | NM_001005862 | ERBB2 | chr17 | 37866592  | 37866734  |
| DRV | NM_001005862 | ERBB2 | chr17 | 37868180  | 37868300  |
| DRV | NM_001005862 | ERBB2 | chr17 | 37868574  | 37868701  |
| DRV | NM_001005862 | ERBB2 | chr17 | 37871538  | 37871612  |
| DRV | NM_001005862 | ERBB2 | chr17 | 37871698  | 37871789  |
| DRV | NM_001005862 | ERBB2 | chr17 | 37871992  | 37872192  |
| DRV | NM_001005862 | ERBB2 | chr17 | 37872553  | 37872686  |
| DRV | NM_001005862 | ERBB2 | chr17 | 37872767  | 37872858  |
| DRV | NM_001005862 | ERBB2 | chr17 | 37873572  | 37873733  |
| DRV | NM_001005862 | ERBB2 | chr17 | 37876039  | 37876087  |
| DRV | NM_001005862 | ERBB2 | chr17 | 37879571  | 37879710  |
| DRV | NM_001005862 | ERBB2 | chr17 | 37879790  | 37879913  |
| DRV | NM_001005862 | ERBB2 | chr17 | 37880164  | 37880263  |
| DRV | NM_001005862 | ERBB2 | chr17 | 37880978  | 37881164  |
| DRV | NM_001005862 | ERBB2 | chr17 | 37881301  | 37881457  |
| DRV | NM_001005862 | ERBB2 | chr17 | 37881579  | 37881655  |
| DRV | NM_001005862 | ERBB2 | chr17 | 37881959  | 37882106  |
| DRV | NM_001005862 | ERBB2 | chr17 | 37882814  | 37882912  |
| DRV | NM_001005862 | ERBB2 | chr17 | 37883067  | 37883256  |
| DRV | NM_001005862 | ERBB2 | chr17 | 37883547  | 37883800  |
| DRV | NM_001005862 | ERBB2 | chr17 | 37883941  | 37884915  |
| SMG | NM_001982    | ERBB3 | chr12 | 56473808  | 56474166  |
| SMG | NM_001982    | ERBB3 | chr12 | 56477534  | 56477686  |
| SMG | NM_001982    | ERBB3 | chr12 | 56478778  | 56478965  |
| SMG | NM_001982    | ERBB3 | chr12 | 56480314  | 56480440  |
| SMG | NM_001982    | ERBB3 | chr12 | 56481360  | 56481426  |
| SMG | NM_001982    | ERBB3 | chr12 | 56481578  | 56481697  |
| SMG | NM_001982    | ERBB3 | chr12 | 56481804  | 56481946  |
| SMG | NM_001982    | ERBB3 | chr12 | 56482326  | 56482440  |
| SMG | NM_001982    | ERBB3 | chr12 | 56482531  | 56482652  |

|     |           |       |       |           |           |
|-----|-----------|-------|-------|-----------|-----------|
| SMG | NM_001982 | ERBB3 | chr12 | 56486530  | 56486604  |
| SMG | NM_001982 | ERBB3 | chr12 | 56486769  | 56486860  |
| SMG | NM_001982 | ERBB3 | chr12 | 56487128  | 56487334  |
| SMG | NM_001982 | ERBB3 | chr12 | 56487547  | 56487680  |
| SMG | NM_001982 | ERBB3 | chr12 | 56487882  | 56487973  |
| SMG | NM_001982 | ERBB3 | chr12 | 56488185  | 56488340  |
| SMG | NM_001982 | ERBB3 | chr12 | 56489040  | 56489094  |
| SMG | NM_001982 | ERBB3 | chr12 | 56489448  | 56489590  |
| SMG | NM_001982 | ERBB3 | chr12 | 56490286  | 56490406  |
| SMG | NM_001982 | ERBB3 | chr12 | 56490531  | 56490630  |
| SMG | NM_001982 | ERBB3 | chr12 | 56490828  | 56491014  |
| SMG | NM_001982 | ERBB3 | chr12 | 56491568  | 56491724  |
| SMG | NM_001982 | ERBB3 | chr12 | 56492283  | 56492359  |
| SMG | NM_001982 | ERBB3 | chr12 | 56492542  | 56492689  |
| SMG | NM_001982 | ERBB3 | chr12 | 56493431  | 56493529  |
| SMG | NM_001982 | ERBB3 | chr12 | 56493621  | 56493813  |
| SMG | NM_001982 | ERBB3 | chr12 | 56493957  | 56494029  |
| SMG | NM_001982 | ERBB3 | chr12 | 56494844  | 56495145  |
| SMG | NM_001982 | ERBB3 | chr12 | 56495312  | 56497291  |
| CNV | NM_178039 | ERC1  | chr12 | 1100403   | 1100488   |
| CNV | NM_178039 | ERC1  | chr12 | 1136913   | 1137738   |
| CNV | NM_178039 | ERC1  | chr12 | 1192329   | 1192746   |
| CNV | NM_178039 | ERC1  | chr12 | 1213915   | 1213990   |
| CNV | NM_178039 | ERC1  | chr12 | 1219357   | 1219513   |
| CNV | NM_178039 | ERC1  | chr12 | 1225031   | 1225199   |
| CNV | NM_178039 | ERC1  | chr12 | 1250785   | 1250953   |
| CNV | NM_178039 | ERC1  | chr12 | 1289705   | 1289843   |
| CNV | NM_178039 | ERC1  | chr12 | 1291090   | 1291231   |
| CNV | NM_178039 | ERC1  | chr12 | 1292446   | 1292587   |
| CNV | NM_178039 | ERC1  | chr12 | 1299024   | 1299218   |
| CNV | NM_178039 | ERC1  | chr12 | 1345934   | 1346070   |
| CNV | NM_178039 | ERC1  | chr12 | 1372199   | 1372331   |
| CNV | NM_178039 | ERC1  | chr12 | 1399017   | 1399178   |
| CNV | NM_178039 | ERC1  | chr12 | 1480998   | 1481143   |
| CNV | NM_178039 | ERC1  | chr12 | 1517314   | 1517413   |
| CNV | NM_178039 | ERC1  | chr12 | 1553727   | 1553916   |
| CNV | NM_178039 | ERC1  | chr12 | 1599258   | 1605099   |
| LIT | NM_000123 | ERCC5 | chr13 | 103498190 | 103498704 |
| LIT | NM_000123 | ERCC5 | chr13 | 103504467 | 103504643 |
| LIT | NM_000123 | ERCC5 | chr13 | 103506106 | 103506222 |
| LIT | NM_000123 | ERCC5 | chr13 | 103506637 | 103506724 |
| LIT | NM_000123 | ERCC5 | chr13 | 103508401 | 103508462 |
| LIT | NM_000123 | ERCC5 | chr13 | 103510624 | 103510768 |

|     |           |        |       |           |           |
|-----|-----------|--------|-------|-----------|-----------|
| LIT | NM_000123 | ERCC5  | chr13 | 103513856 | 103514064 |
| LIT | NM_000123 | ERCC5  | chr13 | 103514379 | 103515453 |
| LIT | NM_000123 | ERCC5  | chr13 | 103518016 | 103518261 |
| LIT | NM_000123 | ERCC5  | chr13 | 103518611 | 103518731 |
| LIT | NM_000123 | ERCC5  | chr13 | 103518981 | 103519195 |
| LIT | NM_000123 | ERCC5  | chr13 | 103520462 | 103520607 |
| LIT | NM_000123 | ERCC5  | chr13 | 103524547 | 103524748 |
| LIT | NM_000123 | ERCC5  | chr13 | 103525608 | 103525693 |
| LIT | NM_000123 | ERCC5  | chr13 | 103527656 | 103528351 |
| LIT | NM_000124 | ERCC6  | chr10 | 50662525  | 50667280  |
| LIT | NM_000124 | ERCC6  | chr10 | 50668418  | 50668497  |
| LIT | NM_000124 | ERCC6  | chr10 | 50669397  | 50669602  |
| LIT | NM_000124 | ERCC6  | chr10 | 50678227  | 50678935  |
| LIT | NM_000124 | ERCC6  | chr10 | 50679020  | 50679166  |
| LIT | NM_000124 | ERCC6  | chr10 | 50680421  | 50680516  |
| LIT | NM_000124 | ERCC6  | chr10 | 50680954  | 50681074  |
| LIT | NM_000124 | ERCC6  | chr10 | 50681522  | 50681633  |
| LIT | NM_000124 | ERCC6  | chr10 | 50682072  | 50682288  |
| LIT | NM_000124 | ERCC6  | chr10 | 50684260  | 50684356  |
| LIT | NM_000124 | ERCC6  | chr10 | 50686399  | 50686516  |
| LIT | NM_000124 | ERCC6  | chr10 | 50690732  | 50690909  |
| LIT | NM_000124 | ERCC6  | chr10 | 50691391  | 50691562  |
| LIT | NM_000124 | ERCC6  | chr10 | 50701162  | 50701298  |
| LIT | NM_000124 | ERCC6  | chr10 | 50708583  | 50708742  |
| LIT | NM_000124 | ERCC6  | chr10 | 50713929  | 50714058  |
| LIT | NM_000124 | ERCC6  | chr10 | 50732078  | 50732823  |
| LIT | NM_000124 | ERCC6  | chr10 | 50736462  | 50736571  |
| LIT | NM_000124 | ERCC6  | chr10 | 50738765  | 50738886  |
| LIT | NM_000124 | ERCC6  | chr10 | 50740588  | 50741024  |
| LIT | NM_000124 | ERCC6  | chr10 | 50747007  | 50747169  |
| LIT | NM_015966 | ERGIC3 | chr20 | 34129777  | 34129934  |
| LIT | NM_015966 | ERGIC3 | chr20 | 34130071  | 34130142  |
| LIT | NM_015966 | ERGIC3 | chr20 | 34130261  | 34130349  |
| LIT | NM_015966 | ERGIC3 | chr20 | 34130570  | 34130690  |
| LIT | NM_015966 | ERGIC3 | chr20 | 34135162  | 34135256  |
| LIT | NM_015966 | ERGIC3 | chr20 | 34136261  | 34136427  |
| LIT | NM_015966 | ERGIC3 | chr20 | 34136560  | 34136618  |
| LIT | NM_015966 | ERGIC3 | chr20 | 34142814  | 34142846  |
| LIT | NM_015966 | ERGIC3 | chr20 | 34143803  | 34143900  |
| LIT | NM_015966 | ERGIC3 | chr20 | 34143977  | 34144042  |
| LIT | NM_015966 | ERGIC3 | chr20 | 34144743  | 34144880  |
| LIT | NM_015966 | ERGIC3 | chr20 | 34144964  | 34145020  |
| LIT | NM_015966 | ERGIC3 | chr20 | 34145195  | 34145405  |

|     |              |        |       |           |           |
|-----|--------------|--------|-------|-----------|-----------|
| CNV | NM_207332    | ERICH1 | chr8  | 614199    | 614676    |
| CNV | NM_207332    | ERICH1 | chr8  | 618597    | 618792    |
| CNV | NM_207332    | ERICH1 | chr8  | 623288    | 624047    |
| CNV | NM_207332    | ERICH1 | chr8  | 642477    | 642612    |
| CNV | NM_207332    | ERICH1 | chr8  | 665860    | 666007    |
| CNV | NM_207332    | ERICH1 | chr8  | 681139    | 681226    |
| SMG | NM_052911    | ESCO1  | chr18 | 19109261  | 19110451  |
| SMG | NM_052911    | ESCO1  | chr18 | 19112433  | 19112621  |
| SMG | NM_052911    | ESCO1  | chr18 | 19116002  | 19116146  |
| SMG | NM_052911    | ESCO1  | chr18 | 19119880  | 19119970  |
| SMG | NM_052911    | ESCO1  | chr18 | 19140819  | 19140951  |
| SMG | NM_052911    | ESCO1  | chr18 | 19144163  | 19144278  |
| SMG | NM_052911    | ESCO1  | chr18 | 19146106  | 19146167  |
| SMG | NM_052911    | ESCO1  | chr18 | 19147940  | 19148055  |
| SMG | NM_052911    | ESCO1  | chr18 | 19153274  | 19155391  |
| SMG | NM_052911    | ESCO1  | chr18 | 19155632  | 19155738  |
| SMG | NM_052911    | ESCO1  | chr18 | 19164270  | 19164401  |
| SMG | NM_052911    | ESCO1  | chr18 | 19180583  | 19180693  |
| SMG | NM_001122742 | ESR1   | chr6  | 152011630 | 152011799 |
| SMG | NM_001122742 | ESR1   | chr6  | 152023009 | 152023140 |
| SMG | NM_001122742 | ESR1   | chr6  | 152128977 | 152129499 |
| SMG | NM_001122742 | ESR1   | chr6  | 152163731 | 152163922 |
| SMG | NM_001122742 | ESR1   | chr6  | 152201789 | 152201906 |
| SMG | NM_001122742 | ESR1   | chr6  | 152265307 | 152265643 |
| SMG | NM_001122742 | ESR1   | chr6  | 152332790 | 152332929 |
| SMG | NM_001122742 | ESR1   | chr6  | 152382125 | 152382259 |
| SMG | NM_001122742 | ESR1   | chr6  | 152415519 | 152415703 |
| SMG | NM_001122742 | ESR1   | chr6  | 152419866 | 152424408 |
| SMG | NM_001166136 | EVC2   | chr4  | 5564145   | 5564842   |
| SMG | NM_001166136 | EVC2   | chr4  | 5566984   | 5567086   |
| SMG | NM_001166136 | EVC2   | chr4  | 5570170   | 5570367   |
| SMG | NM_001166136 | EVC2   | chr4  | 5576411   | 5576499   |
| SMG | NM_001166136 | EVC2   | chr4  | 5577966   | 5578181   |
| SMG | NM_001166136 | EVC2   | chr4  | 5586349   | 5586577   |
| SMG | NM_001166136 | EVC2   | chr4  | 5617148   | 5617271   |
| SMG | NM_001166136 | EVC2   | chr4  | 5620204   | 5620409   |
| SMG | NM_001166136 | EVC2   | chr4  | 5624263   | 5624718   |
| SMG | NM_001166136 | EVC2   | chr4  | 5627475   | 5627635   |
| SMG | NM_001166136 | EVC2   | chr4  | 5630285   | 5630461   |
| SMG | NM_001166136 | EVC2   | chr4  | 5633519   | 5633759   |
| SMG | NM_001166136 | EVC2   | chr4  | 5642240   | 5642565   |
| SMG | NM_001166136 | EVC2   | chr4  | 5664833   | 5664973   |
| SMG | NM_001166136 | EVC2   | chr4  | 5667241   | 5667376   |

|     |              |       |       |           |           |
|-----|--------------|-------|-------|-----------|-----------|
| SMG | NM_001166136 | EVC2  | chr4  | 5682986   | 5683040   |
| SMG | NM_001166136 | EVC2  | chr4  | 5687096   | 5687206   |
| SMG | NM_001166136 | EVC2  | chr4  | 5690883   | 5691070   |
| SMG | NM_001166136 | EVC2  | chr4  | 5692991   | 5693060   |
| SMG | NM_001166136 | EVC2  | chr4  | 5696061   | 5696228   |
| SMG | NM_001166136 | EVC2  | chr4  | 5699319   | 5699374   |
| SMG | NM_001166136 | EVC2  | chr4  | 5710555   | 5711275   |
| LIT | NM_016337    | EVL   | chr14 | 100531750 | 100531848 |
| LIT | NM_016337    | EVL   | chr14 | 100551023 | 100551192 |
| LIT | NM_016337    | EVL   | chr14 | 100563817 | 100563995 |
| LIT | NM_016337    | EVL   | chr14 | 100589875 | 100589939 |
| LIT | NM_016337    | EVL   | chr14 | 100593043 | 100593108 |
| LIT | NM_016337    | EVL   | chr14 | 100594855 | 100595085 |
| LIT | NM_016337    | EVL   | chr14 | 100595899 | 100596021 |
| LIT | NM_016337    | EVL   | chr14 | 100599055 | 100599116 |
| LIT | NM_016337    | EVL   | chr14 | 100602241 | 100602305 |
| LIT | NM_016337    | EVL   | chr14 | 100603914 | 100603981 |
| LIT | NM_016337    | EVL   | chr14 | 100604076 | 100604139 |
| LIT | NM_016337    | EVL   | chr14 | 100607516 | 100607583 |
| LIT | NM_016337    | EVL   | chr14 | 100608072 | 100608130 |
| LIT | NM_016337    | EVL   | chr14 | 100610037 | 100610573 |
| LIT | NM_021807    | EXOC4 | chr7  | 132937822 | 132937943 |
| LIT | NM_021807    | EXOC4 | chr7  | 132959736 | 132959926 |
| LIT | NM_021807    | EXOC4 | chr7  | 132973675 | 132973870 |
| LIT | NM_021807    | EXOC4 | chr7  | 132990630 | 132990815 |
| LIT | NM_021807    | EXOC4 | chr7  | 133002037 | 133002144 |
| LIT | NM_021807    | EXOC4 | chr7  | 133041083 | 133041327 |
| LIT | NM_021807    | EXOC4 | chr7  | 133059581 | 133059756 |
| LIT | NM_021807    | EXOC4 | chr7  | 133160081 | 133160227 |
| LIT | NM_021807    | EXOC4 | chr7  | 133164803 | 133164892 |
| LIT | NM_021807    | EXOC4 | chr7  | 133314797 | 133314894 |
| LIT | NM_021807    | EXOC4 | chr7  | 133502077 | 133502297 |
| LIT | NM_021807    | EXOC4 | chr7  | 133580351 | 133580488 |
| LIT | NM_021807    | EXOC4 | chr7  | 133602335 | 133602491 |
| LIT | NM_021807    | EXOC4 | chr7  | 133622643 | 133622822 |
| LIT | NM_021807    | EXOC4 | chr7  | 133682244 | 133682386 |
| LIT | NM_021807    | EXOC4 | chr7  | 133689664 | 133689843 |
| LIT | NM_021807    | EXOC4 | chr7  | 133692428 | 133692588 |
| LIT | NM_021807    | EXOC4 | chr7  | 133749043 | 133750513 |
| LIT | NM_004100    | EYA4  | chr6  | 133562494 | 133562887 |
| LIT | NM_004100    | EYA4  | chr6  | 133595853 | 133595951 |
| LIT | NM_004100    | EYA4  | chr6  | 133703529 | 133703579 |
| LIT | NM_004100    | EYA4  | chr6  | 133767767 | 133767892 |

|     |              |      |      |           |           |
|-----|--------------|------|------|-----------|-----------|
| LIT | NM_004100    | EYA4 | chr6 | 133769248 | 133769317 |
| LIT | NM_004100    | EYA4 | chr6 | 133777693 | 133777786 |
| LIT | NM_004100    | EYA4 | chr6 | 133782251 | 133782318 |
| LIT | NM_004100    | EYA4 | chr6 | 133783472 | 133783615 |
| LIT | NM_004100    | EYA4 | chr6 | 133783758 | 133783902 |
| LIT | NM_004100    | EYA4 | chr6 | 133785916 | 133785996 |
| LIT | NM_004100    | EYA4 | chr6 | 133789703 | 133789869 |
| LIT | NM_004100    | EYA4 | chr6 | 133802600 | 133802737 |
| LIT | NM_004100    | EYA4 | chr6 | 133804169 | 133804253 |
| LIT | NM_004100    | EYA4 | chr6 | 133827243 | 133827333 |
| LIT | NM_004100    | EYA4 | chr6 | 133833858 | 133833917 |
| LIT | NM_004100    | EYA4 | chr6 | 133834015 | 133834176 |
| LIT | NM_004100    | EYA4 | chr6 | 133836458 | 133836573 |
| LIT | NM_004100    | EYA4 | chr6 | 133844193 | 133844315 |
| LIT | NM_004100    | EYA4 | chr6 | 133846291 | 133846392 |
| LIT | NM_004100    | EYA4 | chr6 | 133849862 | 133853258 |
| DRV | NM_001203247 | EZH2 | chr7 | 148504463 | 148504798 |
| DRV | NM_001203247 | EZH2 | chr7 | 148506162 | 148506247 |
| DRV | NM_001203247 | EZH2 | chr7 | 148506401 | 148506482 |
| DRV | NM_001203247 | EZH2 | chr7 | 148507424 | 148507506 |
| DRV | NM_001203247 | EZH2 | chr7 | 148508716 | 148508812 |
| DRV | NM_001203247 | EZH2 | chr7 | 148511050 | 148511229 |
| DRV | NM_001203247 | EZH2 | chr7 | 148512005 | 148512131 |
| DRV | NM_001203247 | EZH2 | chr7 | 148512597 | 148512638 |
| DRV | NM_001203247 | EZH2 | chr7 | 148513775 | 148513870 |
| DRV | NM_001203247 | EZH2 | chr7 | 148514313 | 148514483 |
| DRV | NM_001203247 | EZH2 | chr7 | 148514968 | 148515209 |
| DRV | NM_001203247 | EZH2 | chr7 | 148516687 | 148516779 |
| DRV | NM_001203247 | EZH2 | chr7 | 148523560 | 148523724 |
| DRV | NM_001203247 | EZH2 | chr7 | 148524255 | 148524358 |
| DRV | NM_001203247 | EZH2 | chr7 | 148525831 | 148525972 |
| DRV | NM_001203247 | EZH2 | chr7 | 148526819 | 148526940 |
| DRV | NM_001203247 | EZH2 | chr7 | 148529725 | 148529842 |
| DRV | NM_001203247 | EZH2 | chr7 | 148543561 | 148543690 |
| DRV | NM_001203247 | EZH2 | chr7 | 148544273 | 148544397 |
| DRV | NM_001203247 | EZH2 | chr7 | 148581255 | 148581441 |
| SMG | NM_000133    | F9   | chrX | 138612894 | 138613011 |
| SMG | NM_000133    | F9   | chrX | 138619168 | 138619332 |
| SMG | NM_000133    | F9   | chrX | 138619520 | 138619545 |
| SMG | NM_000133    | F9   | chrX | 138623234 | 138623348 |
| SMG | NM_000133    | F9   | chrX | 138630521 | 138630650 |
| SMG | NM_000133    | F9   | chrX | 138633220 | 138633423 |
| SMG | NM_000133    | F9   | chrX | 138642899 | 138643014 |



|     |              |         |      |           |           |
|-----|--------------|---------|------|-----------|-----------|
| SMG | NM_000133    | F9      | chrX | 138643682 | 138645617 |
| SMG | NM_001171109 | FAM133A | chrX | 92929011  | 92929273  |
| SMG | NM_001171109 | FAM133A | chrX | 92929679  | 92929751  |
| SMG | NM_001171109 | FAM133A | chrX | 92953395  | 92953484  |
| SMG | NM_001171109 | FAM133A | chrX | 92964315  | 92967273  |
| LIT | NM_015912    | FAM135B | chr8 | 139142265 | 139145041 |
| LIT | NM_015912    | FAM135B | chr8 | 139149389 | 139149503 |
| LIT | NM_015912    | FAM135B | chr8 | 139151228 | 139151339 |
| LIT | NM_015912    | FAM135B | chr8 | 139153440 | 139153592 |
| LIT | NM_015912    | FAM135B | chr8 | 139155254 | 139155352 |
| LIT | NM_015912    | FAM135B | chr8 | 139158201 | 139158293 |
| LIT | NM_015912    | FAM135B | chr8 | 139160762 | 139160929 |
| LIT | NM_015912    | FAM135B | chr8 | 139163436 | 139165459 |
| LIT | NM_015912    | FAM135B | chr8 | 139180137 | 139180292 |
| LIT | NM_015912    | FAM135B | chr8 | 139189589 | 139189663 |
| LIT | NM_015912    | FAM135B | chr8 | 139190777 | 139190933 |
| LIT | NM_015912    | FAM135B | chr8 | 139207500 | 139207550 |
| LIT | NM_015912    | FAM135B | chr8 | 139209758 | 139209912 |
| LIT | NM_015912    | FAM135B | chr8 | 139255184 | 139255311 |
| LIT | NM_015912    | FAM135B | chr8 | 139263083 | 139263257 |
| LIT | NM_015912    | FAM135B | chr8 | 139268931 | 139269002 |
| LIT | NM_015912    | FAM135B | chr8 | 139277945 | 139278085 |
| LIT | NM_015912    | FAM135B | chr8 | 139323083 | 139323163 |
| LIT | NM_015912    | FAM135B | chr8 | 139380149 | 139380245 |
| LIT | NM_015912    | FAM135B | chr8 | 139508913 | 139509065 |
| SMG | NM_173509    | FAM163A | chr1 | 179712297 | 179712558 |
| SMG | NM_173509    | FAM163A | chr1 | 179776932 | 179777023 |
| SMG | NM_173509    | FAM163A | chr1 | 179781244 | 179781266 |
| SMG | NM_173509    | FAM163A | chr1 | 179782210 | 179782325 |
| SMG | NM_173509    | FAM163A | chr1 | 179782913 | 179785333 |
| SMG | NR_046360    | FAM49B  | chr8 | 130851838 | 130854451 |
| SMG | NR_046360    | FAM49B  | chr8 | 130859049 | 130859120 |
| SMG | NR_046360    | FAM49B  | chr8 | 130861488 | 130861615 |
| SMG | NR_046360    | FAM49B  | chr8 | 130863080 | 130863160 |
| SMG | NR_046360    | FAM49B  | chr8 | 130864407 | 130864524 |
| SMG | NR_046360    | FAM49B  | chr8 | 130866511 | 130866589 |
| SMG | NR_046360    | FAM49B  | chr8 | 130867856 | 130867993 |
| SMG | NR_046360    | FAM49B  | chr8 | 130874474 | 130874580 |
| SMG | NR_046360    | FAM49B  | chr8 | 130883620 | 130883742 |
| SMG | NR_046360    | FAM49B  | chr8 | 130891634 | 130891717 |
| SMG | NR_046360    | FAM49B  | chr8 | 130908994 | 130909100 |
| SMG | NR_046360    | FAM49B  | chr8 | 130915557 | 130915596 |
| SMG | NR_046360    | FAM49B  | chr8 | 130916744 | 130916831 |

|     |           |        |       |           |           |
|-----|-----------|--------|-------|-----------|-----------|
| SMG | NR_046360 | FAM49B | chr8  | 130983188 | 130983241 |
| SMG | NR_046360 | FAM49B | chr8  | 131028615 | 131028897 |
| SMG | NM_205849 | FAM9B  | chrX  | 8993036   | 8993418   |
| SMG | NM_205849 | FAM9B  | chrX  | 8993524   | 8993624   |
| SMG | NM_205849 | FAM9B  | chrX  | 8995908   | 8996007   |
| SMG | NM_205849 | FAM9B  | chrX  | 8997347   | 8997459   |
| SMG | NM_205849 | FAM9B  | chrX  | 8998301   | 8998401   |
| SMG | NM_205849 | FAM9B  | chrX  | 9000170   | 9000202   |
| SMG | NM_205849 | FAM9B  | chrX  | 9000381   | 9000502   |
| SMG | NM_205849 | FAM9B  | chrX  | 9000999   | 9001116   |
| LIT | NM_000043 | FAS    | chr10 | 90750287  | 90750663  |
| LIT | NM_000043 | FAS    | chr10 | 90762785  | 90762951  |
| LIT | NM_000043 | FAS    | chr10 | 90767456  | 90767594  |
| LIT | NM_000043 | FAS    | chr10 | 90768645  | 90768754  |
| LIT | NM_000043 | FAS    | chr10 | 90770295  | 90770357  |
| LIT | NM_000043 | FAS    | chr10 | 90770509  | 90770572  |
| LIT | NM_000043 | FAS    | chr10 | 90771755  | 90771838  |
| LIT | NM_000043 | FAS    | chr10 | 90773099  | 90773124  |
| LIT | NM_000043 | FAS    | chr10 | 90773875  | 90775542  |
| SMG | NM_024582 | FAT4   | chr4  | 126237566 | 126242741 |
| SMG | NM_024582 | FAT4   | chr4  | 126319938 | 126320070 |
| SMG | NM_024582 | FAT4   | chr4  | 126328034 | 126328296 |
| SMG | NM_024582 | FAT4   | chr4  | 126329598 | 126329949 |
| SMG | NM_024582 | FAT4   | chr4  | 126336038 | 126336961 |
| SMG | NM_024582 | FAT4   | chr4  | 126337602 | 126337777 |
| SMG | NM_024582 | FAT4   | chr4  | 126355399 | 126355580 |
| SMG | NM_024582 | FAT4   | chr4  | 126367453 | 126367698 |
| SMG | NM_024582 | FAT4   | chr4  | 126369615 | 126373965 |
| SMG | NM_024582 | FAT4   | chr4  | 126384717 | 126384822 |
| SMG | NM_024582 | FAT4   | chr4  | 126389666 | 126389974 |
| SMG | NM_024582 | FAT4   | chr4  | 126397325 | 126397411 |
| SMG | NM_024582 | FAT4   | chr4  | 126398309 | 126398489 |
| SMG | NM_024582 | FAT4   | chr4  | 126400895 | 126401020 |
| SMG | NM_024582 | FAT4   | chr4  | 126402675 | 126402893 |
| SMG | NM_024582 | FAT4   | chr4  | 126408499 | 126408761 |
| SMG | NM_024582 | FAT4   | chr4  | 126411055 | 126414087 |
| LIT | NM_000138 | FBN1   | chr15 | 48700502  | 48703576  |
| LIT | NM_000138 | FBN1   | chr15 | 48704765  | 48704940  |
| LIT | NM_000138 | FBN1   | chr15 | 48707732  | 48707964  |
| LIT | NM_000138 | FBN1   | chr15 | 48712883  | 48713003  |
| LIT | NM_000138 | FBN1   | chr15 | 48713754  | 48713883  |
| LIT | NM_000138 | FBN1   | chr15 | 48714148  | 48714265  |
| LIT | NM_000138 | FBN1   | chr15 | 48717565  | 48717688  |

|     |           |      |       |          |          |
|-----|-----------|------|-------|----------|----------|
| LIT | NM_000138 | FBN1 | chr15 | 48717935 | 48718061 |
| LIT | NM_000138 | FBN1 | chr15 | 48719763 | 48719970 |
| LIT | NM_000138 | FBN1 | chr15 | 48720542 | 48720668 |
| LIT | NM_000138 | FBN1 | chr15 | 48722867 | 48722999 |
| LIT | NM_000138 | FBN1 | chr15 | 48725062 | 48725185 |
| LIT | NM_000138 | FBN1 | chr15 | 48726790 | 48726910 |
| LIT | NM_000138 | FBN1 | chr15 | 48729157 | 48729274 |
| LIT | NM_000138 | FBN1 | chr15 | 48729518 | 48729584 |
| LIT | NM_000138 | FBN1 | chr15 | 48729964 | 48730114 |
| LIT | NM_000138 | FBN1 | chr15 | 48733917 | 48734043 |
| LIT | NM_000138 | FBN1 | chr15 | 48736737 | 48736857 |
| LIT | NM_000138 | FBN1 | chr15 | 48737572 | 48737701 |
| LIT | NM_000138 | FBN1 | chr15 | 48738902 | 48739019 |
| LIT | NM_000138 | FBN1 | chr15 | 48740964 | 48741090 |
| LIT | NM_000138 | FBN1 | chr15 | 48744758 | 48744881 |
| LIT | NM_000138 | FBN1 | chr15 | 48748833 | 48748959 |
| LIT | NM_000138 | FBN1 | chr15 | 48752442 | 48752514 |
| LIT | NM_000138 | FBN1 | chr15 | 48755278 | 48755437 |
| LIT | NM_000138 | FBN1 | chr15 | 48756095 | 48756218 |
| LIT | NM_000138 | FBN1 | chr15 | 48757764 | 48757890 |
| LIT | NM_000138 | FBN1 | chr15 | 48757986 | 48758055 |
| LIT | NM_000138 | FBN1 | chr15 | 48760134 | 48760299 |
| LIT | NM_000138 | FBN1 | chr15 | 48760608 | 48760731 |
| LIT | NM_000138 | FBN1 | chr15 | 48762830 | 48762953 |
| LIT | NM_000138 | FBN1 | chr15 | 48764747 | 48764873 |
| LIT | NM_000138 | FBN1 | chr15 | 48766451 | 48766574 |
| LIT | NM_000138 | FBN1 | chr15 | 48766724 | 48766847 |
| LIT | NM_000138 | FBN1 | chr15 | 48773851 | 48773977 |
| LIT | NM_000138 | FBN1 | chr15 | 48776014 | 48776140 |
| LIT | NM_000138 | FBN1 | chr15 | 48777570 | 48777693 |
| LIT | NM_000138 | FBN1 | chr15 | 48779271 | 48779397 |
| LIT | NM_000138 | FBN1 | chr15 | 48779508 | 48779634 |
| LIT | NM_000138 | FBN1 | chr15 | 48780309 | 48780438 |
| LIT | NM_000138 | FBN1 | chr15 | 48780564 | 48780690 |
| LIT | NM_000138 | FBN1 | chr15 | 48782047 | 48782275 |
| LIT | NM_000138 | FBN1 | chr15 | 48784657 | 48784783 |
| LIT | NM_000138 | FBN1 | chr15 | 48786400 | 48786451 |
| LIT | NM_000138 | FBN1 | chr15 | 48787319 | 48787457 |
| LIT | NM_000138 | FBN1 | chr15 | 48787665 | 48787785 |
| LIT | NM_000138 | FBN1 | chr15 | 48788296 | 48788422 |
| LIT | NM_000138 | FBN1 | chr15 | 48789462 | 48789588 |
| LIT | NM_000138 | FBN1 | chr15 | 48791181 | 48791235 |
| LIT | NM_000138 | FBN1 | chr15 | 48795983 | 48796136 |

|     |           |        |       |           |           |
|-----|-----------|--------|-------|-----------|-----------|
| LIT | NM_000138 | FBN1   | chr15 | 48797221  | 48797344  |
| LIT | NM_000138 | FBN1   | chr15 | 48800778  | 48800901  |
| LIT | NM_000138 | FBN1   | chr15 | 48802240  | 48802366  |
| LIT | NM_000138 | FBN1   | chr15 | 48805745  | 48805865  |
| LIT | NM_000138 | FBN1   | chr15 | 48807583  | 48807724  |
| LIT | NM_000138 | FBN1   | chr15 | 48808379  | 48808559  |
| LIT | NM_000138 | FBN1   | chr15 | 48812855  | 48813014  |
| LIT | NM_000138 | FBN1   | chr15 | 48818326  | 48818452  |
| LIT | NM_000138 | FBN1   | chr15 | 48826276  | 48826402  |
| LIT | NM_000138 | FBN1   | chr15 | 48829807  | 48830005  |
| LIT | NM_000138 | FBN1   | chr15 | 48888479  | 48888575  |
| LIT | NM_000138 | FBN1   | chr15 | 48892335  | 48892431  |
| LIT | NM_000138 | FBN1   | chr15 | 48902924  | 48903023  |
| LIT | NM_000138 | FBN1   | chr15 | 48905206  | 48905289  |
| LIT | NM_000138 | FBN1   | chr15 | 48936802  | 48937147  |
| LIT | NM_000138 | FBN1   | chr15 | 48937771  | 48937985  |
| CNV | NM_012173 | FBXO25 | chr8  | 356807    | 357066    |
| CNV | NM_012173 | FBXO25 | chr8  | 363072    | 363213    |
| CNV | NM_012173 | FBXO25 | chr8  | 381340    | 381444    |
| CNV | NM_012173 | FBXO25 | chr8  | 385614    | 385707    |
| CNV | NM_012173 | FBXO25 | chr8  | 399989    | 400083    |
| CNV | NM_012173 | FBXO25 | chr8  | 401268    | 401453    |
| CNV | NM_012173 | FBXO25 | chr8  | 408368    | 408551    |
| CNV | NM_012173 | FBXO25 | chr8  | 413006    | 413150    |
| CNV | NM_012173 | FBXO25 | chr8  | 418714    | 419875    |
| CNV | NM_012176 | FBXO4  | chr5  | 41925355  | 41925600  |
| CNV | NM_012176 | FBXO4  | chr5  | 41927114  | 41927350  |
| CNV | NM_012176 | FBXO4  | chr5  | 41929798  | 41930019  |
| CNV | NM_012176 | FBXO4  | chr5  | 41934047  | 41934123  |
| CNV | NM_012176 | FBXO4  | chr5  | 41934234  | 41934410  |
| CNV | NM_012176 | FBXO4  | chr5  | 41939542  | 41939718  |
| CNV | NM_012176 | FBXO4  | chr5  | 41941293  | 41941672  |
| DRV | NM_033632 | FBXW7  | chr4  | 153242409 | 153244301 |
| DRV | NM_033632 | FBXW7  | chr4  | 153245335 | 153245546 |
| DRV | NM_033632 | FBXW7  | chr4  | 153247157 | 153247383 |
| DRV | NM_033632 | FBXW7  | chr4  | 153249359 | 153249541 |
| DRV | NM_033632 | FBXW7  | chr4  | 153250823 | 153250937 |
| DRV | NM_033632 | FBXW7  | chr4  | 153251883 | 153252020 |
| DRV | NM_033632 | FBXW7  | chr4  | 153253747 | 153253871 |
| DRV | NM_033632 | FBXW7  | chr4  | 153258953 | 153259088 |
| DRV | NM_033632 | FBXW7  | chr4  | 153268081 | 153268223 |
| DRV | NM_033632 | FBXW7  | chr4  | 153271193 | 153271276 |
| DRV | NM_033632 | FBXW7  | chr4  | 153332454 | 153333024 |

|     |              |        |      |           |           |
|-----|--------------|--------|------|-----------|-----------|
| DRV | NM_033632    | FBXW7  | chr4 | 153456092 | 153456185 |
| CNV | NM_020177    | FEM1C  | chr5 | 114856607 | 114861314 |
| CNV | NM_020177    | FEM1C  | chr5 | 114878646 | 114879380 |
| CNV | NM_020177    | FEM1C  | chr5 | 114880219 | 114880591 |
| LIT | NM_001039112 | FER1L6 | chr8 | 124864226 | 124864425 |
| LIT | NM_001039112 | FER1L6 | chr8 | 124968231 | 124968314 |
| LIT | NM_001039112 | FER1L6 | chr8 | 124975517 | 124975638 |
| LIT | NM_001039112 | FER1L6 | chr8 | 124978246 | 124978301 |
| LIT | NM_001039112 | FER1L6 | chr8 | 124978398 | 124978530 |
| LIT | NM_001039112 | FER1L6 | chr8 | 124982274 | 124982337 |
| LIT | NM_001039112 | FER1L6 | chr8 | 124985673 | 124985752 |
| LIT | NM_001039112 | FER1L6 | chr8 | 124987389 | 124987546 |
| LIT | NM_001039112 | FER1L6 | chr8 | 124988137 | 124988324 |
| LIT | NM_001039112 | FER1L6 | chr8 | 124989656 | 124989849 |
| LIT | NM_001039112 | FER1L6 | chr8 | 124992704 | 124993051 |
| LIT | NM_001039112 | FER1L6 | chr8 | 124998307 | 124998416 |
| LIT | NM_001039112 | FER1L6 | chr8 | 125015406 | 125015587 |
| LIT | NM_001039112 | FER1L6 | chr8 | 125022833 | 125022954 |
| LIT | NM_001039112 | FER1L6 | chr8 | 125025670 | 125025771 |
| LIT | NM_001039112 | FER1L6 | chr8 | 125029867 | 125029958 |
| LIT | NM_001039112 | FER1L6 | chr8 | 125033789 | 125033909 |
| LIT | NM_001039112 | FER1L6 | chr8 | 125035683 | 125035836 |
| LIT | NM_001039112 | FER1L6 | chr8 | 125047517 | 125047695 |
| LIT | NM_001039112 | FER1L6 | chr8 | 125052122 | 125052247 |
| LIT | NM_001039112 | FER1L6 | chr8 | 125058007 | 125058142 |
| LIT | NM_001039112 | FER1L6 | chr8 | 125061847 | 125061997 |
| LIT | NM_001039112 | FER1L6 | chr8 | 125072420 | 125072531 |
| LIT | NM_001039112 | FER1L6 | chr8 | 125072788 | 125072950 |
| LIT | NM_001039112 | FER1L6 | chr8 | 125074092 | 125074273 |
| LIT | NM_001039112 | FER1L6 | chr8 | 125076587 | 125076814 |
| LIT | NM_001039112 | FER1L6 | chr8 | 125078668 | 125078791 |
| LIT | NM_001039112 | FER1L6 | chr8 | 125080007 | 125080047 |
| LIT | NM_001039112 | FER1L6 | chr8 | 125081600 | 125081716 |
| LIT | NM_001039112 | FER1L6 | chr8 | 125082707 | 125082839 |
| LIT | NM_001039112 | FER1L6 | chr8 | 125083746 | 125083872 |
| LIT | NM_001039112 | FER1L6 | chr8 | 125088438 | 125088566 |
| LIT | NM_001039112 | FER1L6 | chr8 | 125094528 | 125094699 |
| LIT | NM_001039112 | FER1L6 | chr8 | 125103663 | 125103824 |
| LIT | NM_001039112 | FER1L6 | chr8 | 125107136 | 125107279 |
| LIT | NM_001039112 | FER1L6 | chr8 | 125109511 | 125109600 |
| LIT | NM_001039112 | FER1L6 | chr8 | 125110025 | 125110124 |
| LIT | NM_001039112 | FER1L6 | chr8 | 125113337 | 125113579 |
| LIT | NM_001039112 | FER1L6 | chr8 | 125115386 | 125115550 |

|     |              |        |       |           |           |
|-----|--------------|--------|-------|-----------|-----------|
| LIT | NM_001039112 | FER1L6 | chr8  | 125131084 | 125131185 |
| LIT | NM_001039112 | FER1L6 | chr8  | 125131847 | 125132302 |
| CNV | NM_152536    | FGD5   | chr3  | 14860468  | 14863103  |
| CNV | NM_152536    | FGD5   | chr3  | 14905634  | 14905767  |
| CNV | NM_152536    | FGD5   | chr3  | 14922078  | 14922137  |
| CNV | NM_152536    | FGD5   | chr3  | 14922248  | 14922279  |
| CNV | NM_152536    | FGD5   | chr3  | 14939015  | 14939176  |
| CNV | NM_152536    | FGD5   | chr3  | 14939445  | 14939602  |
| CNV | NM_152536    | FGD5   | chr3  | 14940245  | 14940333  |
| CNV | NM_152536    | FGD5   | chr3  | 14941909  | 14941960  |
| CNV | NM_152536    | FGD5   | chr3  | 14942509  | 14942568  |
| CNV | NM_152536    | FGD5   | chr3  | 14949146  | 14949218  |
| CNV | NM_152536    | FGD5   | chr3  | 14952367  | 14952436  |
| CNV | NM_152536    | FGD5   | chr3  | 14958755  | 14958839  |
| CNV | NM_152536    | FGD5   | chr3  | 14960260  | 14960340  |
| CNV | NM_152536    | FGD5   | chr3  | 14963424  | 14963524  |
| CNV | NM_152536    | FGD5   | chr3  | 14963917  | 14964055  |
| CNV | NM_152536    | FGD5   | chr3  | 14964552  | 14964682  |
| CNV | NM_152536    | FGD5   | chr3  | 14965514  | 14965645  |
| CNV | NM_152536    | FGD5   | chr3  | 14967576  | 14967705  |
| CNV | NM_152536    | FGD5   | chr3  | 14974083  | 14974238  |
| CNV | NM_152536    | FGD5   | chr3  | 14974637  | 14976072  |
| CNV | NM_004465    | FGF10  | chr5  | 44305096  | 44305294  |
| CNV | NM_004465    | FGF10  | chr5  | 44310528  | 44310632  |
| CNV | NM_004465    | FGF10  | chr5  | 44388459  | 44388784  |
| SMG | NM_005130    | FGFBP1 | chr4  | 15937192  | 15938275  |
| SMG | NM_005130    | FGFBP1 | chr4  | 15939873  | 15940094  |
| SMG | NM_005130    | FGFBP1 | chr4  | 15940309  | 15940363  |
| DRV | NM_000141    | FGFR2  | chr10 | 123237843 | 123239535 |
| DRV | NM_000141    | FGFR2  | chr10 | 123243211 | 123243317 |
| DRV | NM_000141    | FGFR2  | chr10 | 123244908 | 123245046 |
| DRV | NM_000141    | FGFR2  | chr10 | 123246867 | 123246938 |
| DRV | NM_000141    | FGFR2  | chr10 | 123247504 | 123247627 |
| DRV | NM_000141    | FGFR2  | chr10 | 123256045 | 123256236 |
| DRV | NM_000141    | FGFR2  | chr10 | 123258008 | 123258119 |
| DRV | NM_000141    | FGFR2  | chr10 | 123260339 | 123260461 |
| DRV | NM_000141    | FGFR2  | chr10 | 123263303 | 123263455 |
| DRV | NM_000141    | FGFR2  | chr10 | 123274630 | 123274833 |
| DRV | NM_000141    | FGFR2  | chr10 | 123276832 | 123276977 |
| DRV | NM_000141    | FGFR2  | chr10 | 123279492 | 123279683 |
| DRV | NM_000141    | FGFR2  | chr10 | 123298105 | 123298229 |
| DRV | NM_000141    | FGFR2  | chr10 | 123310803 | 123310973 |
| DRV | NM_000141    | FGFR2  | chr10 | 123324015 | 123324093 |

|     |              |        |       |           |           |
|-----|--------------|--------|-------|-----------|-----------|
| DRV | NM_000141    | FGFR2  | chr10 | 123324951 | 123325218 |
| DRV | NM_000141    | FGFR2  | chr10 | 123353222 | 123353481 |
| DRV | NM_000141    | FGFR2  | chr10 | 123357475 | 123357972 |
| CNV | NM_001166243 | FHIT   | chr3  | 59735035  | 59735294  |
| CNV | NM_001166243 | FHIT   | chr3  | 59737946  | 59738047  |
| CNV | NM_001166243 | FHIT   | chr3  | 59908071  | 59908140  |
| CNV | NM_001166243 | FHIT   | chr3  | 59997096  | 59997126  |
| CNV | NM_001166243 | FHIT   | chr3  | 59999732  | 59999878  |
| CNV | NM_001166243 | FHIT   | chr3  | 60522592  | 60522712  |
| CNV | NM_001166243 | FHIT   | chr3  | 60807612  | 60807705  |
| CNV | NM_001166243 | FHIT   | chr3  | 61027718  | 61027771  |
| CNV | NM_001166243 | FHIT   | chr3  | 61186290  | 61186339  |
| CNV | NM_001166243 | FHIT   | chr3  | 61236974  | 61237133  |
| SMG | NM_025135    | FHOD3  | chr18 | 33877658  | 33877963  |
| SMG | NM_025135    | FHOD3  | chr18 | 33935501  | 33935608  |
| SMG | NM_025135    | FHOD3  | chr18 | 33952642  | 33952707  |
| SMG | NM_025135    | FHOD3  | chr18 | 34081894  | 34081962  |
| SMG | NM_025135    | FHOD3  | chr18 | 34092400  | 34092506  |
| SMG | NM_025135    | FHOD3  | chr18 | 34156413  | 34156508  |
| SMG | NM_025135    | FHOD3  | chr18 | 34174749  | 34174861  |
| SMG | NM_025135    | FHOD3  | chr18 | 34182636  | 34182731  |
| SMG | NM_025135    | FHOD3  | chr18 | 34191914  | 34192058  |
| SMG | NM_025135    | FHOD3  | chr18 | 34205473  | 34205712  |
| SMG | NM_025135    | FHOD3  | chr18 | 34238037  | 34238151  |
| SMG | NM_025135    | FHOD3  | chr18 | 34261398  | 34261533  |
| SMG | NM_025135    | FHOD3  | chr18 | 34267090  | 34267141  |
| SMG | NM_025135    | FHOD3  | chr18 | 34273171  | 34273386  |
| SMG | NM_025135    | FHOD3  | chr18 | 34289057  | 34289354  |
| SMG | NM_025135    | FHOD3  | chr18 | 34297794  | 34298678  |
| SMG | NM_025135    | FHOD3  | chr18 | 34310608  | 34310767  |
| SMG | NM_025135    | FHOD3  | chr18 | 34320618  | 34320801  |
| SMG | NM_025135    | FHOD3  | chr18 | 34322699  | 34322819  |
| SMG | NM_025135    | FHOD3  | chr18 | 34323994  | 34324156  |
| SMG | NM_025135    | FHOD3  | chr18 | 34326907  | 34327098  |
| SMG | NM_025135    | FHOD3  | chr18 | 34335081  | 34335274  |
| SMG | NM_025135    | FHOD3  | chr18 | 34340570  | 34340745  |
| SMG | NM_025135    | FHOD3  | chr18 | 34349227  | 34349389  |
| SMG | NM_025135    | FHOD3  | chr18 | 34359410  | 34360022  |
| SMG | NM_016594    | FKBP11 | chr12 | 49315741  | 49315984  |
| SMG | NM_016594    | FKBP11 | chr12 | 49317564  | 49317635  |
| SMG | NM_016594    | FKBP11 | chr12 | 49318005  | 49318039  |
| SMG | NM_016594    | FKBP11 | chr12 | 49318343  | 49318431  |
| SMG | NM_016594    | FKBP11 | chr12 | 49318828  | 49318894  |

|     |              |        |                |           |           |
|-----|--------------|--------|----------------|-----------|-----------|
| SMG | NM_016594    | FKBP11 | chr12          | 49319082  | 49319330  |
| SMG | NM_002016    | FLG    | chr1           | 152274650 | 152287223 |
| SMG | NM_002016    | FLG    | chr1           | 152287794 | 152287953 |
| SMG | NM_002016    | FLG    | chr1           | 152297664 | 152297679 |
| SMG | NM_005803    | FLOT1  | chr6_ssto_hap7 | 2027817   | 2028229   |
| SMG | NM_005803    | FLOT1  | chr6_ssto_hap7 | 2030105   | 2030270   |
| SMG | NM_005803    | FLOT1  | chr6_ssto_hap7 | 2030511   | 2030649   |
| SMG | NM_005803    | FLOT1  | chr6_ssto_hap7 | 2030765   | 2030811   |
| SMG | NM_005803    | FLOT1  | chr6_ssto_hap7 | 2031002   | 2031184   |
| SMG | NM_005803    | FLOT1  | chr6_ssto_hap7 | 2040250   | 2040403   |
| SMG | NM_005803    | FLOT1  | chr6_ssto_hap7 | 2040588   | 2040684   |
| SMG | NM_005803    | FLOT1  | chr6_ssto_hap7 | 2040771   | 2040891   |
| SMG | NM_005803    | FLOT1  | chr6_ssto_hap7 | 2041283   | 2041427   |
| SMG | NM_005803    | FLOT1  | chr6_ssto_hap7 | 2041707   | 2041798   |
| SMG | NM_005803    | FLOT1  | chr6_ssto_hap7 | 2041885   | 2041961   |
| SMG | NM_005803    | FLOT1  | chr6_ssto_hap7 | 2042240   | 2042297   |
| SMG | NM_005803    | FLOT1  | chr6_ssto_hap7 | 2042620   | 2042770   |
| DRV | NM_004119    | FLT3   | chr13          | 28577410  | 28578311  |
| DRV | NM_004119    | FLT3   | chr13          | 28588588  | 28588694  |
| DRV | NM_004119    | FLT3   | chr13          | 28589293  | 28589393  |
| DRV | NM_004119    | FLT3   | chr13          | 28589726  | 28589838  |
| DRV | NM_004119    | FLT3   | chr13          | 28592603  | 28592726  |
| DRV | NM_004119    | FLT3   | chr13          | 28597486  | 28597614  |
| DRV | NM_004119    | FLT3   | chr13          | 28598997  | 28599080  |
| DRV | NM_004119    | FLT3   | chr13          | 28601224  | 28601378  |
| DRV | NM_004119    | FLT3   | chr13          | 28602314  | 28602425  |
| DRV | NM_004119    | FLT3   | chr13          | 28608023  | 28608128  |
| DRV | NM_004119    | FLT3   | chr13          | 28608218  | 28608351  |
| DRV | NM_004119    | FLT3   | chr13          | 28608437  | 28608544  |
| DRV | NM_004119    | FLT3   | chr13          | 28609631  | 28609810  |
| DRV | NM_004119    | FLT3   | chr13          | 28610071  | 28610180  |
| DRV | NM_004119    | FLT3   | chr13          | 28611321  | 28611425  |
| DRV | NM_004119    | FLT3   | chr13          | 28622411  | 28622580  |
| DRV | NM_004119    | FLT3   | chr13          | 28623520  | 28623674  |
| DRV | NM_004119    | FLT3   | chr13          | 28623771  | 28623911  |
| DRV | NM_004119    | FLT3   | chr13          | 28624231  | 28624359  |
| DRV | NM_004119    | FLT3   | chr13          | 28626681  | 28626811  |
| DRV | NM_004119    | FLT3   | chr13          | 28631483  | 28631599  |
| DRV | NM_004119    | FLT3   | chr13          | 28636003  | 28636206  |
| DRV | NM_004119    | FLT3   | chr13          | 28644627  | 28644749  |
| DRV | NM_004119    | FLT3   | chr13          | 28674604  | 28674729  |
| CNV | NM_001079673 | FNDC3A | chr13          | 49550047  | 49550313  |
| CNV | NM_001079673 | FNDC3A | chr13          | 49580287  | 49580425  |



|     |              |        |       |          |          |
|-----|--------------|--------|-------|----------|----------|
| CNV | NM_001079673 | FNDC3A | chr13 | 49649424 | 49649500 |
| CNV | NM_001079673 | FNDC3A | chr13 | 49688790 | 49688867 |
| CNV | NM_001079673 | FNDC3A | chr13 | 49705272 | 49705510 |
| CNV | NM_001079673 | FNDC3A | chr13 | 49710467 | 49710737 |
| CNV | NM_001079673 | FNDC3A | chr13 | 49712882 | 49712941 |
| CNV | NM_001079673 | FNDC3A | chr13 | 49719913 | 49720071 |
| CNV | NM_001079673 | FNDC3A | chr13 | 49741379 | 49741439 |
| CNV | NM_001079673 | FNDC3A | chr13 | 49742748 | 49742887 |
| CNV | NM_001079673 | FNDC3A | chr13 | 49746178 | 49746232 |
| CNV | NM_001079673 | FNDC3A | chr13 | 49748570 | 49748695 |
| CNV | NM_001079673 | FNDC3A | chr13 | 49749502 | 49749677 |
| CNV | NM_001079673 | FNDC3A | chr13 | 49752703 | 49752790 |
| CNV | NM_001079673 | FNDC3A | chr13 | 49760099 | 49760238 |
| CNV | NM_001079673 | FNDC3A | chr13 | 49761257 | 49761326 |
| CNV | NM_001079673 | FNDC3A | chr13 | 49762650 | 49762769 |
| CNV | NM_001079673 | FNDC3A | chr13 | 49765150 | 49765256 |
| CNV | NM_001079673 | FNDC3A | chr13 | 49765344 | 49765520 |
| CNV | NM_001079673 | FNDC3A | chr13 | 49771012 | 49771126 |
| CNV | NM_001079673 | FNDC3A | chr13 | 49771860 | 49772010 |
| CNV | NM_001079673 | FNDC3A | chr13 | 49772117 | 49772401 |
| CNV | NM_001079673 | FNDC3A | chr13 | 49772497 | 49772710 |
| CNV | NM_001079673 | FNDC3A | chr13 | 49775935 | 49776102 |
| CNV | NM_001079673 | FNDC3A | chr13 | 49777292 | 49777420 |
| CNV | NM_001079673 | FNDC3A | chr13 | 49781216 | 49783915 |
| CNV | NM_001453    | FOXC1  | chr6  | 1610680  | 1614129  |
| CNV | NM_207361    | FREM2  | chr13 | 39261172 | 39266654 |
| CNV | NM_207361    | FREM2  | chr13 | 39271834 | 39271924 |
| CNV | NM_207361    | FREM2  | chr13 | 39338440 | 39338587 |
| CNV | NM_207361    | FREM2  | chr13 | 39343714 | 39343945 |
| CNV | NM_207361    | FREM2  | chr13 | 39357206 | 39357332 |
| CNV | NM_207361    | FREM2  | chr13 | 39358693 | 39358945 |
| CNV | NM_207361    | FREM2  | chr13 | 39420709 | 39420859 |
| CNV | NM_207361    | FREM2  | chr13 | 39422597 | 39422807 |
| CNV | NM_207361    | FREM2  | chr13 | 39424174 | 39424372 |
| CNV | NM_207361    | FREM2  | chr13 | 39425080 | 39425245 |
| CNV | NM_207361    | FREM2  | chr13 | 39425822 | 39426005 |
| CNV | NM_207361    | FREM2  | chr13 | 39430262 | 39430393 |
| CNV | NM_207361    | FREM2  | chr13 | 39432011 | 39432170 |
| CNV | NM_207361    | FREM2  | chr13 | 39433423 | 39433727 |
| CNV | NM_207361    | FREM2  | chr13 | 39435567 | 39435699 |
| CNV | NM_207361    | FREM2  | chr13 | 39438411 | 39438743 |
| CNV | NM_207361    | FREM2  | chr13 | 39446878 | 39447071 |
| CNV | NM_207361    | FREM2  | chr13 | 39448618 | 39448723 |

|     |              |       |       |           |           |
|-----|--------------|-------|-------|-----------|-----------|
| CNV | NM_207361    | FREM2 | chr13 | 39450158  | 39450286  |
| CNV | NM_207361    | FREM2 | chr13 | 39450384  | 39450519  |
| CNV | NM_207361    | FREM2 | chr13 | 39451253  | 39451380  |
| CNV | NM_207361    | FREM2 | chr13 | 39452270  | 39452458  |
| CNV | NM_207361    | FREM2 | chr13 | 39452967  | 39453114  |
| CNV | NM_207361    | FREM2 | chr13 | 39454420  | 39461267  |
| CNV | NR_003579    | FRG1B | chr20 | 29611878  | 29612101  |
| CNV | NR_003579    | FRG1B | chr20 | 29614260  | 29614327  |
| CNV | NR_003579    | FRG1B | chr20 | 29623128  | 29623254  |
| CNV | NR_003579    | FRG1B | chr20 | 29625872  | 29625984  |
| CNV | NR_003579    | FRG1B | chr20 | 29628226  | 29628331  |
| CNV | NR_003579    | FRG1B | chr20 | 29631537  | 29631629  |
| CNV | NR_003579    | FRG1B | chr20 | 29632610  | 29632721  |
| CNV | NR_003579    | FRG1B | chr20 | 29633897  | 29634007  |
| CNV | NM_001243093 | FYB   | chr5  | 39105353  | 39107567  |
| CNV | NM_001243093 | FYB   | chr5  | 39108332  | 39108364  |
| CNV | NM_001243093 | FYB   | chr5  | 39110457  | 39110491  |
| CNV | NM_001243093 | FYB   | chr5  | 39118975  | 39119138  |
| CNV | NM_001243093 | FYB   | chr5  | 39119636  | 39119736  |
| CNV | NM_001243093 | FYB   | chr5  | 39122437  | 39122504  |
| CNV | NM_001243093 | FYB   | chr5  | 39124354  | 39124380  |
| CNV | NM_001243093 | FYB   | chr5  | 39126099  | 39126237  |
| CNV | NM_001243093 | FYB   | chr5  | 39127842  | 39127909  |
| CNV | NM_001243093 | FYB   | chr5  | 39130691  | 39130714  |
| CNV | NM_001243093 | FYB   | chr5  | 39134309  | 39134451  |
| CNV | NM_001243093 | FYB   | chr5  | 39134956  | 39135116  |
| CNV | NM_001243093 | FYB   | chr5  | 39137701  | 39137822  |
| CNV | NM_001243093 | FYB   | chr5  | 39138758  | 39138793  |
| CNV | NM_001243093 | FYB   | chr5  | 39139334  | 39139354  |
| CNV | NM_001243093 | FYB   | chr5  | 39141196  | 39141243  |
| CNV | NM_001243093 | FYB   | chr5  | 39153549  | 39153706  |
| CNV | NM_001243093 | FYB   | chr5  | 39201927  | 39203089  |
| CNV | NM_001243093 | FYB   | chr5  | 39270670  | 39270759  |
| SMG | NM_017412    | FZD3  | chr8  | 28351721  | 28351860  |
| SMG | NM_017412    | FZD3  | chr8  | 28357449  | 28357495  |
| SMG | NM_017412    | FZD3  | chr8  | 28360186  | 28360719  |
| SMG | NM_017412    | FZD3  | chr8  | 28378154  | 28378351  |
| SMG | NM_017412    | FZD3  | chr8  | 28384663  | 28385681  |
| SMG | NM_017412    | FZD3  | chr8  | 28409119  | 28409268  |
| SMG | NM_017412    | FZD3  | chr8  | 28413254  | 28413488  |
| SMG | NM_017412    | FZD3  | chr8  | 28420314  | 28431785  |
| SMG | NR_104114    | GAB3  | chrX  | 153903526 | 153906571 |
| SMG | NR_104114    | GAB3  | chrX  | 153908408 | 153908525 |

|     |           |         |       |           |           |
|-----|-----------|---------|-------|-----------|-----------|
| SMG | NR_104114 | GAB3    | chrX  | 153924191 | 153924294 |
| SMG | NR_104114 | GAB3    | chrX  | 153925406 | 153925488 |
| SMG | NR_104114 | GAB3    | chrX  | 153927568 | 153927788 |
| SMG | NR_104114 | GAB3    | chrX  | 153928278 | 153928334 |
| SMG | NR_104114 | GAB3    | chrX  | 153941481 | 153941701 |
| SMG | NR_104114 | GAB3    | chrX  | 153944300 | 153944604 |
| SMG | NR_104114 | GAB3    | chrX  | 153979766 | 153979858 |
| CNV | NM_021912 | GABRB3  | chr15 | 26788693  | 26793281  |
| CNV | NM_021912 | GABRB3  | chr15 | 26806078  | 26806323  |
| CNV | NM_021912 | GABRB3  | chr15 | 26812727  | 26812880  |
| CNV | NM_021912 | GABRB3  | chr15 | 26825465  | 26825603  |
| CNV | NM_021912 | GABRB3  | chr15 | 26828478  | 26828561  |
| CNV | NM_021912 | GABRB3  | chr15 | 26866460  | 26866681  |
| CNV | NM_021912 | GABRB3  | chr15 | 27017548  | 27017616  |
| CNV | NM_021912 | GABRB3  | chr15 | 27017827  | 27017919  |
| CNV | NM_021912 | GABRB3  | chr15 | 27018791  | 27018935  |
| CNV | NM_033223 | GABRG3  | chr15 | 27216428  | 27216735  |
| CNV | NM_033223 | GABRG3  | chr15 | 27222148  | 27222297  |
| CNV | NM_033223 | GABRG3  | chr15 | 27271900  | 27271968  |
| CNV | NM_033223 | GABRG3  | chr15 | 27571955  | 27572176  |
| CNV | NM_033223 | GABRG3  | chr15 | 27573952  | 27574035  |
| CNV | NM_033223 | GABRG3  | chr15 | 27725795  | 27725933  |
| CNV | NM_033223 | GABRG3  | chr15 | 27765117  | 27765270  |
| CNV | NM_033223 | GABRG3  | chr15 | 27772578  | 27772775  |
| CNV | NM_033223 | GABRG3  | chr15 | 27773078  | 27773138  |
| CNV | NM_033223 | GABRG3  | chr15 | 27777745  | 27778373  |
| LIT | NM_000512 | GALNS   | chr16 | 88880141  | 88880933  |
| LIT | NM_000512 | GALNS   | chr16 | 88884414  | 88884532  |
| LIT | NM_000512 | GALNS   | chr16 | 88888996  | 88889118  |
| LIT | NM_000512 | GALNS   | chr16 | 88891174  | 88891277  |
| LIT | NM_000512 | GALNS   | chr16 | 88893109  | 88893246  |
| LIT | NM_000512 | GALNS   | chr16 | 88898405  | 88898509  |
| LIT | NM_000512 | GALNS   | chr16 | 88901620  | 88901760  |
| LIT | NM_000512 | GALNS   | chr16 | 88902132  | 88902257  |
| LIT | NM_000512 | GALNS   | chr16 | 88902608  | 88902675  |
| LIT | NM_000512 | GALNS   | chr16 | 88904029  | 88904173  |
| LIT | NM_000512 | GALNS   | chr16 | 88907399  | 88907502  |
| LIT | NM_000512 | GALNS   | chr16 | 88908304  | 88908379  |
| LIT | NM_000512 | GALNS   | chr16 | 88909113  | 88909237  |
| LIT | NM_000512 | GALNS   | chr16 | 88923165  | 88923374  |
| CNV | NM_052917 | GALNT13 | chr2  | 154728425 | 154728816 |
| CNV | NM_052917 | GALNT13 | chr2  | 154757448 | 154757520 |
| CNV | NM_052917 | GALNT13 | chr2  | 154800906 | 154801152 |

|     |              |         |       |           |           |
|-----|--------------|---------|-------|-----------|-----------|
| CNV | NM_052917    | GALNT13 | chr2  | 154996849 | 154997018 |
| CNV | NM_052917    | GALNT13 | chr2  | 155098542 | 155098709 |
| CNV | NM_052917    | GALNT13 | chr2  | 155099210 | 155099418 |
| CNV | NM_052917    | GALNT13 | chr2  | 155102324 | 155102495 |
| CNV | NM_052917    | GALNT13 | chr2  | 155115533 | 155115651 |
| CNV | NM_052917    | GALNT13 | chr2  | 155157921 | 155158102 |
| CNV | NM_052917    | GALNT13 | chr2  | 155252502 | 155252642 |
| CNV | NM_052917    | GALNT13 | chr2  | 155265495 | 155265594 |
| CNV | NM_052917    | GALNT13 | chr2  | 155295103 | 155295238 |
| CNV | NM_052917    | GALNT13 | chr2  | 155306922 | 155310489 |
| SMG | NM_001253826 | GALNT14 | chr2  | 31133330  | 31133925  |
| SMG | NM_001253826 | GALNT14 | chr2  | 31135088  | 31135208  |
| SMG | NM_001253826 | GALNT14 | chr2  | 31146984  | 31147129  |
| SMG | NM_001253826 | GALNT14 | chr2  | 31147605  | 31147689  |
| SMG | NM_001253826 | GALNT14 | chr2  | 31152260  | 31152353  |
| SMG | NM_001253826 | GALNT14 | chr2  | 31154933  | 31155060  |
| SMG | NM_001253826 | GALNT14 | chr2  | 31165066  | 31165170  |
| SMG | NM_001253826 | GALNT14 | chr2  | 31167723  | 31167808  |
| SMG | NM_001253826 | GALNT14 | chr2  | 31168648  | 31168736  |
| SMG | NM_001253826 | GALNT14 | chr2  | 31178483  | 31178605  |
| SMG | NM_001253826 | GALNT14 | chr2  | 31178777  | 31178843  |
| SMG | NM_001253826 | GALNT14 | chr2  | 31181262  | 31181330  |
| SMG | NM_001253826 | GALNT14 | chr2  | 31189069  | 31189168  |
| SMG | NM_001253826 | GALNT14 | chr2  | 31337608  | 31337693  |
| SMG | NM_001253826 | GALNT14 | chr2  | 31348019  | 31348119  |
| SMG | NM_001253826 | GALNT14 | chr2  | 31360823  | 31361592  |
| SMG | NM_145292    | GALNTL5 | chr7  | 151653463 | 151653694 |
| SMG | NM_145292    | GALNTL5 | chr7  | 151664292 | 151664578 |
| SMG | NM_145292    | GALNTL5 | chr7  | 151668029 | 151668150 |
| SMG | NM_145292    | GALNTL5 | chr7  | 151680070 | 151680237 |
| SMG | NM_145292    | GALNTL5 | chr7  | 151684243 | 151684366 |
| SMG | NM_145292    | GALNTL5 | chr7  | 151699798 | 151700048 |
| SMG | NM_145292    | GALNTL5 | chr7  | 151704911 | 151705029 |
| SMG | NM_145292    | GALNTL5 | chr7  | 151711728 | 151711878 |
| SMG | NM_145292    | GALNTL5 | chr7  | 151716730 | 151717019 |
| SMG | NM_022041    | GAN     | chr16 | 81348570  | 81348885  |
| SMG | NM_022041    | GAN     | chr16 | 81385187  | 81385302  |
| SMG | NM_022041    | GAN     | chr16 | 81388009  | 81388360  |
| SMG | NM_022041    | GAN     | chr16 | 81390389  | 81390607  |
| SMG | NM_022041    | GAN     | chr16 | 81391414  | 81391536  |
| SMG | NM_022041    | GAN     | chr16 | 81396103  | 81396216  |
| SMG | NM_022041    | GAN     | chr16 | 81397398  | 81397548  |
| SMG | NM_022041    | GAN     | chr16 | 81398578  | 81398715  |

|     |              |        |       |          |          |
|-----|--------------|--------|-------|----------|----------|
| SMG | NM_022041    | GAN    | chr16 | 81398954 | 81399083 |
| SMG | NM_022041    | GAN    | chr16 | 81410823 | 81410933 |
| SMG | NM_022041    | GAN    | chr16 | 81411019 | 81413803 |
| SMG | NM_001242409 | GAREM  | chr18 | 29843483 | 29848731 |
| SMG | NM_001242409 | GAREM  | chr18 | 29850179 | 29850346 |
| SMG | NM_001242409 | GAREM  | chr18 | 29866993 | 29868166 |
| SMG | NM_001242409 | GAREM  | chr18 | 29890155 | 29890286 |
| SMG | NM_001242409 | GAREM  | chr18 | 29972857 | 29972998 |
| SMG | NM_001242409 | GAREM  | chr18 | 30050270 | 30050447 |
| SMG | NM_201433    | GAS7   | chr17 | 9813925  | 9820658  |
| SMG | NM_201433    | GAS7   | chr17 | 9821317  | 9821416  |
| SMG | NM_201433    | GAS7   | chr17 | 9822942  | 9823022  |
| SMG | NM_201433    | GAS7   | chr17 | 9828792  | 9828916  |
| SMG | NM_201433    | GAS7   | chr17 | 9829957  | 9830086  |
| SMG | NM_201433    | GAS7   | chr17 | 9837482  | 9837561  |
| SMG | NM_201433    | GAS7   | chr17 | 9843442  | 9843517  |
| SMG | NM_201433    | GAS7   | chr17 | 9846437  | 9846553  |
| SMG | NM_201433    | GAS7   | chr17 | 9850210  | 9850300  |
| SMG | NM_201433    | GAS7   | chr17 | 9862518  | 9862572  |
| SMG | NM_201433    | GAS7   | chr17 | 9872993  | 9873079  |
| SMG | NM_201433    | GAS7   | chr17 | 9885120  | 9885201  |
| SMG | NM_201433    | GAS7   | chr17 | 9923093  | 9923214  |
| SMG | NM_201433    | GAS7   | chr17 | 10101524 | 10101868 |
| SMG | NM_018284    | GBP3   | chr1  | 89472359 | 89473535 |
| SMG | NM_018284    | GBP3   | chr1  | 89474629 | 89474823 |
| SMG | NM_018284    | GBP3   | chr1  | 89475074 | 89475177 |
| SMG | NM_018284    | GBP3   | chr1  | 89476586 | 89476799 |
| SMG | NM_018284    | GBP3   | chr1  | 89477429 | 89477710 |
| SMG | NM_018284    | GBP3   | chr1  | 89478867 | 89479110 |
| SMG | NM_018284    | GBP3   | chr1  | 89479765 | 89479962 |
| SMG | NM_018284    | GBP3   | chr1  | 89480229 | 89480339 |
| SMG | NM_018284    | GBP3   | chr1  | 89480969 | 89481097 |
| SMG | NM_018284    | GBP3   | chr1  | 89486214 | 89486426 |
| SMG | NM_018284    | GBP3   | chr1  | 89488366 | 89488549 |
| SMG | NM_003616    | GEMIN2 | chr14 | 39583487 | 39583679 |
| SMG | NM_003616    | GEMIN2 | chr14 | 39584032 | 39584117 |
| SMG | NM_003616    | GEMIN2 | chr14 | 39587202 | 39587292 |
| SMG | NM_003616    | GEMIN2 | chr14 | 39587743 | 39587803 |
| SMG | NM_003616    | GEMIN2 | chr14 | 39591633 | 39591747 |
| SMG | NM_003616    | GEMIN2 | chr14 | 39594195 | 39594240 |
| SMG | NM_003616    | GEMIN2 | chr14 | 39597483 | 39597552 |
| SMG | NM_003616    | GEMIN2 | chr14 | 39601161 | 39601272 |
| SMG | NM_003616    | GEMIN2 | chr14 | 39602864 | 39602923 |

|     |              |        |       |          |          |
|-----|--------------|--------|-------|----------|----------|
| SMG | NM_003616    | GEMIN2 | chr14 | 39605643 | 39606177 |
| SMG | NM_015044    | GGA2   | chr16 | 23474862 | 23479021 |
| SMG | NM_015044    | GGA2   | chr16 | 23480206 | 23480317 |
| SMG | NM_015044    | GGA2   | chr16 | 23481316 | 23481486 |
| SMG | NM_015044    | GGA2   | chr16 | 23486224 | 23486382 |
| SMG | NM_015044    | GGA2   | chr16 | 23489688 | 23489822 |
| SMG | NM_015044    | GGA2   | chr16 | 23490203 | 23490232 |
| SMG | NM_015044    | GGA2   | chr16 | 23491085 | 23491208 |
| SMG | NM_015044    | GGA2   | chr16 | 23491965 | 23492091 |
| SMG | NM_015044    | GGA2   | chr16 | 23494243 | 23494325 |
| SMG | NM_015044    | GGA2   | chr16 | 23497335 | 23497473 |
| SMG | NM_015044    | GGA2   | chr16 | 23498030 | 23498111 |
| SMG | NM_015044    | GGA2   | chr16 | 23499926 | 23500030 |
| SMG | NM_015044    | GGA2   | chr16 | 23502997 | 23503121 |
| SMG | NM_015044    | GGA2   | chr16 | 23504680 | 23504779 |
| SMG | NM_015044    | GGA2   | chr16 | 23505623 | 23505699 |
| SMG | NM_015044    | GGA2   | chr16 | 23507014 | 23507099 |
| SMG | NM_015044    | GGA2   | chr16 | 23521641 | 23521815 |
| SMG | NM_001199815 | GGCT   | chr7  | 30536236 | 30536851 |
| SMG | NM_001199815 | GGCT   | chr7  | 30537356 | 30537512 |
| SMG | NM_001199815 | GGCT   | chr7  | 30540151 | 30540297 |
| SMG | NM_001199815 | GGCT   | chr7  | 30544184 | 30544457 |
| SMG | NM_024835    | GGNBP2 | chr17 | 34900736 | 34900946 |
| SMG | NM_024835    | GGNBP2 | chr17 | 34901467 | 34901666 |
| SMG | NM_024835    | GGNBP2 | chr17 | 34910660 | 34910741 |
| SMG | NM_024835    | GGNBP2 | chr17 | 34912922 | 34913176 |
| SMG | NM_024835    | GGNBP2 | chr17 | 34916612 | 34916711 |
| SMG | NM_024835    | GGNBP2 | chr17 | 34923501 | 34923615 |
| SMG | NM_024835    | GGNBP2 | chr17 | 34934412 | 34934616 |
| SMG | NM_024835    | GGNBP2 | chr17 | 34935674 | 34935849 |
| SMG | NM_024835    | GGNBP2 | chr17 | 34937773 | 34937968 |
| SMG | NM_024835    | GGNBP2 | chr17 | 34941729 | 34941880 |
| SMG | NM_024835    | GGNBP2 | chr17 | 34942269 | 34942395 |
| SMG | NM_024835    | GGNBP2 | chr17 | 34942479 | 34942628 |
| SMG | NM_024835    | GGNBP2 | chr17 | 34943426 | 34943675 |
| SMG | NM_024835    | GGNBP2 | chr17 | 34945637 | 34946276 |
| SMG | NM_013430    | GGT1   | chr22 | 24979717 | 24979776 |
| SMG | NM_013430    | GGT1   | chr22 | 25003920 | 25003990 |
| SMG | NM_013430    | GGT1   | chr22 | 25005931 | 25006000 |
| SMG | NM_013430    | GGT1   | chr22 | 25006216 | 25006498 |
| SMG | NM_013430    | GGT1   | chr22 | 25007041 | 25007212 |
| SMG | NM_013430    | GGT1   | chr22 | 25010742 | 25010873 |
| SMG | NM_013430    | GGT1   | chr22 | 25011007 | 25011094 |

|     |              |       |       |           |           |
|-----|--------------|-------|-------|-----------|-----------|
| SMG | NM_013430    | GGT1  | chr22 | 25016294  | 25016487  |
| SMG | NM_013430    | GGT1  | chr22 | 25016879  | 25017037  |
| SMG | NM_013430    | GGT1  | chr22 | 25019073  | 25019223  |
| SMG | NM_013430    | GGT1  | chr22 | 25019746  | 25019883  |
| SMG | NM_013430    | GGT1  | chr22 | 25023398  | 25023586  |
| SMG | NM_013430    | GGT1  | chr22 | 25023818  | 25023946  |
| SMG | NM_013430    | GGT1  | chr22 | 25024047  | 25024160  |
| SMG | NM_013430    | GGT1  | chr22 | 25024241  | 25024355  |
| SMG | NM_013430    | GGT1  | chr22 | 25024659  | 25024972  |
| CNV | NM_000163    | GHR   | chr5  | 42423876  | 42424057  |
| CNV | NM_000163    | GHR   | chr5  | 42565965  | 42566046  |
| CNV | NM_000163    | GHR   | chr5  | 42629139  | 42629205  |
| CNV | NM_000163    | GHR   | chr5  | 42688991  | 42689121  |
| CNV | NM_000163    | GHR   | chr5  | 42695018  | 42695191  |
| CNV | NM_000163    | GHR   | chr5  | 42699925  | 42700104  |
| CNV | NM_000163    | GHR   | chr5  | 42711308  | 42711474  |
| CNV | NM_000163    | GHR   | chr5  | 42713530  | 42713621  |
| CNV | NM_000163    | GHR   | chr5  | 42718153  | 42718223  |
| CNV | NM_000163    | GHR   | chr5  | 42718554  | 42721980  |
| CNV | NM_017676    | GIN1  | chr5  | 102421703 | 102423876 |
| CNV | NM_017676    | GIN1  | chr5  | 102432244 | 102432530 |
| CNV | NM_017676    | GIN1  | chr5  | 102433017 | 102433194 |
| CNV | NM_017676    | GIN1  | chr5  | 102433293 | 102433485 |
| CNV | NM_017676    | GIN1  | chr5  | 102440244 | 102440550 |
| CNV | NM_017676    | GIN1  | chr5  | 102442419 | 102442613 |
| CNV | NM_017676    | GIN1  | chr5  | 102444272 | 102444418 |
| CNV | NM_017676    | GIN1  | chr5  | 102455767 | 102455842 |
| SMG | NM_001135953 | GKAP1 | chr9  | 86354335  | 86354659  |
| SMG | NM_001135953 | GKAP1 | chr9  | 86356866  | 86356944  |
| SMG | NM_001135953 | GKAP1 | chr9  | 86357444  | 86357515  |
| SMG | NM_001135953 | GKAP1 | chr9  | 86363223  | 86363287  |
| SMG | NM_001135953 | GKAP1 | chr9  | 86368172  | 86368274  |
| SMG | NM_001135953 | GKAP1 | chr9  | 86395296  | 86395319  |
| SMG | NM_001135953 | GKAP1 | chr9  | 86399629  | 86399753  |
| SMG | NM_001135953 | GKAP1 | chr9  | 86403515  | 86403593  |
| SMG | NM_001135953 | GKAP1 | chr9  | 86414099  | 86414243  |
| SMG | NM_001135953 | GKAP1 | chr9  | 86421216  | 86421475  |
| SMG | NM_001135953 | GKAP1 | chr9  | 86431910  | 86432042  |
| SMG | NM_001135953 | GKAP1 | chr9  | 86432431  | 86432752  |
| SMG | NM_181789    | GLDN  | chr15 | 51633712  | 51634244  |
| SMG | NM_181789    | GLDN  | chr15 | 51669645  | 51669697  |
| SMG | NM_181789    | GLDN  | chr15 | 51675632  | 51675650  |
| SMG | NM_181789    | GLDN  | chr15 | 51675981  | 51676089  |

|     |              |       |       |           |           |
|-----|--------------|-------|-------|-----------|-----------|
| SMG | NM_181789    | GLDN  | chr15 | 51687031  | 51687178  |
| SMG | NM_181789    | GLDN  | chr15 | 51689666  | 51689795  |
| SMG | NM_181789    | GLDN  | chr15 | 51692388  | 51692472  |
| SMG | NM_181789    | GLDN  | chr15 | 51692569  | 51692695  |
| SMG | NM_181789    | GLDN  | chr15 | 51693789  | 51693940  |
| SMG | NM_181789    | GLDN  | chr15 | 51696473  | 51700209  |
| SMG | NM_001118890 | GLRX  | chr5  | 95149552  | 95150093  |
| SMG | NM_001118890 | GLRX  | chr5  | 95152210  | 95152330  |
| SMG | NM_001118890 | GLRX  | chr5  | 95158159  | 95158577  |
| CNV | NM_001500    | GMDS  | chr6  | 1624034   | 1624466   |
| CNV | NM_001500    | GMDS  | chr6  | 1624706   | 1624775   |
| CNV | NM_001500    | GMDS  | chr6  | 1726649   | 1726746   |
| CNV | NM_001500    | GMDS  | chr6  | 1742701   | 1742820   |
| CNV | NM_001500    | GMDS  | chr6  | 1930336   | 1930464   |
| CNV | NM_001500    | GMDS  | chr6  | 1960100   | 1960205   |
| CNV | NM_001500    | GMDS  | chr6  | 1961007   | 1961200   |
| CNV | NM_001500    | GMDS  | chr6  | 2116004   | 2116114   |
| CNV | NM_001500    | GMDS  | chr6  | 2117702   | 2117790   |
| CNV | NM_001500    | GMDS  | chr6  | 2124920   | 2124965   |
| CNV | NM_001500    | GMDS  | chr6  | 2245554   | 2245868   |
| SMG | NM_002066    | GML   | chr8  | 143916216 | 143916284 |
| SMG | NM_002066    | GML   | chr8  | 143921831 | 143921926 |
| SMG | NM_002066    | GML   | chr8  | 143922533 | 143922641 |
| SMG | NM_002066    | GML   | chr8  | 143927810 | 143928262 |
| SMG | NM_013335    | GMPPA | chr2  | 220363586 | 220363660 |
| SMG | NM_013335    | GMPPA | chr2  | 220364677 | 220364737 |
| SMG | NM_013335    | GMPPA | chr2  | 220364842 | 220364940 |
| SMG | NM_013335    | GMPPA | chr2  | 220366197 | 220366301 |
| SMG | NM_013335    | GMPPA | chr2  | 220366572 | 220366759 |
| SMG | NM_013335    | GMPPA | chr2  | 220367103 | 220367163 |
| SMG | NM_013335    | GMPPA | chr2  | 220368804 | 220368935 |
| SMG | NM_013335    | GMPPA | chr2  | 220369949 | 220370084 |
| SMG | NM_013335    | GMPPA | chr2  | 220370179 | 220370277 |
| SMG | NM_013335    | GMPPA | chr2  | 220370436 | 220370483 |
| SMG | NM_013335    | GMPPA | chr2  | 220370701 | 220370794 |
| SMG | NM_013335    | GMPPA | chr2  | 220370975 | 220371144 |
| SMG | NM_013335    | GMPPA | chr2  | 220371419 | 220371718 |
| DRV | NM_016592    | GNAS  | chr20 | 57414794  | 57415941  |
| DRV | NM_016592    | GNAS  | chr20 | 57470666  | 57470739  |
| DRV | NM_016592    | GNAS  | chr20 | 57473995  | 57474040  |
| DRV | NM_016592    | GNAS  | chr20 | 57478582  | 57478640  |
| DRV | NM_016592    | GNAS  | chr20 | 57478726  | 57478846  |
| DRV | NM_016592    | GNAS  | chr20 | 57480437  | 57480535  |



|     |              |       |       |           |           |
|-----|--------------|-------|-------|-----------|-----------|
| DRV | NM_016592    | GNAS  | chr20 | 57484216  | 57484271  |
| DRV | NM_016592    | GNAS  | chr20 | 57484404  | 57484478  |
| DRV | NM_016592    | GNAS  | chr20 | 57484575  | 57484634  |
| DRV | NM_016592    | GNAS  | chr20 | 57484738  | 57484859  |
| DRV | NM_016592    | GNAS  | chr20 | 57485005  | 57485136  |
| DRV | NM_016592    | GNAS  | chr20 | 57485388  | 57485456  |
| DRV | NM_016592    | GNAS  | chr20 | 57485737  | 57486250  |
| SMG | NM_001007024 | GOSR1 | chr17 | 28804425  | 28804504  |
| SMG | NM_001007024 | GOSR1 | chr17 | 28808160  | 28808275  |
| SMG | NM_001007024 | GOSR1 | chr17 | 28811231  | 28811319  |
| SMG | NM_001007024 | GOSR1 | chr17 | 28811680  | 28811788  |
| SMG | NM_001007024 | GOSR1 | chr17 | 28817143  | 28817235  |
| SMG | NM_001007024 | GOSR1 | chr17 | 28819696  | 28819771  |
| SMG | NM_001007024 | GOSR1 | chr17 | 28837897  | 28837927  |
| SMG | NM_001007024 | GOSR1 | chr17 | 28846956  | 28847039  |
| SMG | NM_001007024 | GOSR1 | chr17 | 28849271  | 28853832  |
| SMG | NM_002079    | GOT1  | chr10 | 101156626 | 101157443 |
| SMG | NM_002079    | GOT1  | chr10 | 101162336 | 101162479 |
| SMG | NM_002079    | GOT1  | chr10 | 101163225 | 101163391 |
| SMG | NM_002079    | GOT1  | chr10 | 101163480 | 101163631 |
| SMG | NM_002079    | GOT1  | chr10 | 101165512 | 101165617 |
| SMG | NM_002079    | GOT1  | chr10 | 101165893 | 101166006 |
| SMG | NM_002079    | GOT1  | chr10 | 101166482 | 101166606 |
| SMG | NM_002079    | GOT1  | chr10 | 101180380 | 101180562 |
| SMG | NM_002079    | GOT1  | chr10 | 101190204 | 101190530 |
| LIT | NM_005708    | GPC6  | chr13 | 93879077  | 93879869  |
| LIT | NM_005708    | GPC6  | chr13 | 94197515  | 94197674  |
| LIT | NM_005708    | GPC6  | chr13 | 94482406  | 94482798  |
| LIT | NM_005708    | GPC6  | chr13 | 94679982  | 94680148  |
| LIT | NM_005708    | GPC6  | chr13 | 94938602  | 94938733  |
| LIT | NM_005708    | GPC6  | chr13 | 94958233  | 94958377  |
| LIT | NM_005708    | GPC6  | chr13 | 95034667  | 95034804  |
| LIT | NM_005708    | GPC6  | chr13 | 95050719  | 95050895  |
| LIT | NM_005708    | GPC6  | chr13 | 95055268  | 95060273  |
| CNV | NM_001083112 | GPD2  | chr2  | 157291964 | 157292316 |
| CNV | NM_001083112 | GPD2  | chr2  | 157332609 | 157332719 |
| CNV | NM_001083112 | GPD2  | chr2  | 157352555 | 157352727 |
| CNV | NM_001083112 | GPD2  | chr2  | 157367307 | 157367432 |
| CNV | NM_001083112 | GPD2  | chr2  | 157368731 | 157368829 |
| CNV | NM_001083112 | GPD2  | chr2  | 157369844 | 157370008 |
| CNV | NM_001083112 | GPD2  | chr2  | 157406119 | 157406284 |
| CNV | NM_001083112 | GPD2  | chr2  | 157407113 | 157407258 |
| CNV | NM_001083112 | GPD2  | chr2  | 157413900 | 157414094 |

|     |              |        |       |           |           |
|-----|--------------|--------|-------|-----------|-----------|
| CNV | NM_001083112 | GPD2   | chr2  | 157425336 | 157425471 |
| CNV | NM_001083112 | GPD2   | chr2  | 157425874 | 157426050 |
| CNV | NM_001083112 | GPD2   | chr2  | 157426598 | 157426730 |
| CNV | NM_001083112 | GPD2   | chr2  | 157427645 | 157427804 |
| CNV | NM_001083112 | GPD2   | chr2  | 157435400 | 157435513 |
| CNV | NM_001083112 | GPD2   | chr2  | 157435597 | 157435676 |
| CNV | NM_001083112 | GPD2   | chr2  | 157436201 | 157436300 |
| CNV | NM_001083112 | GPD2   | chr2  | 157439304 | 157442915 |
| SMG | NM_181791    | GPR141 | chr7  | 37779995  | 37780913  |
| SMG | NM_001097579 | GPR34  | chrX  | 41548225  | 41548337  |
| SMG | NM_001097579 | GPR34  | chrX  | 41548995  | 41549088  |
| SMG | NM_001097579 | GPR34  | chrX  | 41554807  | 41556530  |
| SMG | NM_031936    | GPR61  | chr1  | 110082493 | 110082575 |
| SMG | NM_031936    | GPR61  | chr1  | 110085043 | 110087261 |
| SMG | NM_031936    | GPR61  | chr1  | 110087932 | 110088455 |
| SMG | NM_023915    | GPR87  | chr3  | 151011875 | 151012999 |
| SMG | NM_023915    | GPR87  | chr3  | 151017854 | 151017986 |
| SMG | NM_023915    | GPR87  | chr3  | 151034373 | 151034636 |
| SMG | NM_002083    | GPX2   | chr14 | 65405869  | 65406556  |
| SMG | NM_002083    | GPX2   | chr14 | 65409222  | 65409623  |
| LIT | NM_004490    | GRB14  | chr2  | 165349322 | 165349692 |
| LIT | NM_004490    | GRB14  | chr2  | 165350940 | 165351034 |
| LIT | NM_004490    | GRB14  | chr2  | 165353517 | 165353605 |
| LIT | NM_004490    | GRB14  | chr2  | 165353720 | 165353793 |
| LIT | NM_004490    | GRB14  | chr2  | 165353883 | 165354000 |
| LIT | NM_004490    | GRB14  | chr2  | 165358764 | 165358845 |
| LIT | NM_004490    | GRB14  | chr2  | 165364964 | 165365060 |
| LIT | NM_004490    | GRB14  | chr2  | 165365251 | 165365362 |
| LIT | NM_004490    | GRB14  | chr2  | 165378489 | 165378627 |
| LIT | NM_004490    | GRB14  | chr2  | 165381513 | 165381588 |
| LIT | NM_004490    | GRB14  | chr2  | 165383523 | 165383645 |
| LIT | NM_004490    | GRB14  | chr2  | 165404169 | 165404326 |
| LIT | NM_004490    | GRB14  | chr2  | 165476196 | 165476329 |
| LIT | NM_004490    | GRB14  | chr2  | 165477628 | 165478360 |
| LIT | NM_001004056 | GRK4   | chr4  | 2965342   | 2965849   |
| LIT | NM_001004056 | GRK4   | chr4  | 2990453   | 2990566   |
| LIT | NM_001004056 | GRK4   | chr4  | 2993941   | 2994019   |
| LIT | NM_001004056 | GRK4   | chr4  | 3005957   | 3006061   |
| LIT | NM_001004056 | GRK4   | chr4  | 3009462   | 3009555   |
| LIT | NM_001004056 | GRK4   | chr4  | 3011374   | 3011438   |
| LIT | NM_001004056 | GRK4   | chr4  | 3015414   | 3015555   |
| LIT | NM_001004056 | GRK4   | chr4  | 3021367   | 3021558   |
| LIT | NM_001004056 | GRK4   | chr4  | 3024140   | 3024178   |

|     |              |         |       |           |           |
|-----|--------------|---------|-------|-----------|-----------|
| LIT | NM_001004056 | GRK4    | chr4  | 3029638   | 3029728   |
| LIT | NM_001004056 | GRK4    | chr4  | 3030927   | 3031136   |
| LIT | NM_001004056 | GRK4    | chr4  | 3037112   | 3037250   |
| LIT | NM_001004056 | GRK4    | chr4  | 3039100   | 3039238   |
| LIT | NM_001004056 | GRK4    | chr4  | 3040102   | 3040240   |
| LIT | NM_001004056 | GRK4    | chr4  | 3042298   | 3042474   |
| SMG | NM_001146156 | GSK3B   | chr3  | 119540801 | 119545702 |
| SMG | NM_001146156 | GSK3B   | chr3  | 119562101 | 119562200 |
| SMG | NM_001146156 | GSK3B   | chr3  | 119582265 | 119582452 |
| SMG | NM_001146156 | GSK3B   | chr3  | 119595259 | 119595355 |
| SMG | NM_001146156 | GSK3B   | chr3  | 119624601 | 119624699 |
| SMG | NM_001146156 | GSK3B   | chr3  | 119631550 | 119631657 |
| SMG | NM_001146156 | GSK3B   | chr3  | 119634890 | 119635021 |
| SMG | NM_001146156 | GSK3B   | chr3  | 119642219 | 119642330 |
| SMG | NM_001146156 | GSK3B   | chr3  | 119666114 | 119666198 |
| SMG | NM_001146156 | GSK3B   | chr3  | 119720892 | 119721086 |
| SMG | NM_001146156 | GSK3B   | chr3  | 119812193 | 119813264 |
| CNV | NM_004128    | GTF2F2  | chr13 | 45694630  | 45694856  |
| CNV | NM_004128    | GTF2F2  | chr13 | 45710867  | 45710941  |
| CNV | NM_004128    | GTF2F2  | chr13 | 45723904  | 45723923  |
| CNV | NM_004128    | GTF2F2  | chr13 | 45725821  | 45725966  |
| CNV | NM_004128    | GTF2F2  | chr13 | 45781558  | 45781640  |
| CNV | NM_004128    | GTF2F2  | chr13 | 45827005  | 45827105  |
| CNV | NM_004128    | GTF2F2  | chr13 | 45841367  | 45841511  |
| CNV | NM_004128    | GTF2F2  | chr13 | 45857576  | 45858239  |
| LIT | NM_000855    | GUCY1A2 | chr11 | 106544737 | 106558482 |
| LIT | NM_000855    | GUCY1A2 | chr11 | 106579237 | 106579392 |
| LIT | NM_000855    | GUCY1A2 | chr11 | 106647164 | 106647308 |
| LIT | NM_000855    | GUCY1A2 | chr11 | 106680718 | 106681204 |
| LIT | NM_000855    | GUCY1A2 | chr11 | 106810185 | 106810904 |
| LIT | NM_000855    | GUCY1A2 | chr11 | 106849344 | 106849466 |
| LIT | NM_000855    | GUCY1A2 | chr11 | 106856795 | 106856857 |
| LIT | NM_000855    | GUCY1A2 | chr11 | 106888478 | 106889171 |
| SMG | NM_000856    | GUCY1A3 | chr4  | 156587861 | 156588117 |
| SMG | NM_000856    | GUCY1A3 | chr4  | 156588497 | 156588571 |
| SMG | NM_000856    | GUCY1A3 | chr4  | 156589241 | 156589335 |
| SMG | NM_000856    | GUCY1A3 | chr4  | 156617907 | 156618274 |
| SMG | NM_000856    | GUCY1A3 | chr4  | 156625083 | 156625145 |
| SMG | NM_000856    | GUCY1A3 | chr4  | 156629387 | 156629446 |
| SMG | NM_000856    | GUCY1A3 | chr4  | 156631693 | 156632403 |
| SMG | NM_000856    | GUCY1A3 | chr4  | 156634249 | 156634735 |
| SMG | NM_000856    | GUCY1A3 | chr4  | 156638310 | 156638454 |
| SMG | NM_000856    | GUCY1A3 | chr4  | 156643189 | 156643344 |

|     |              |         |       |           |           |
|-----|--------------|---------|-------|-----------|-----------|
| SMG | NM_000856    | GUCY1A3 | chr4  | 156651181 | 156658214 |
| SMG | NM_002104    | GZMK    | chr5  | 54320106  | 54320214  |
| SMG | NM_002104    | GZMK    | chr5  | 54320487  | 54320635  |
| SMG | NM_002104    | GZMK    | chr5  | 54326261  | 54326412  |
| SMG | NM_002104    | GZMK    | chr5  | 54327191  | 54327461  |
| SMG | NM_002104    | GZMK    | chr5  | 54329592  | 54329960  |
| LIT | NM_001884    | HAPLN1  | chr5  | 82934016  | 82937604  |
| LIT | NM_001884    | HAPLN1  | chr5  | 82940181  | 82940484  |
| LIT | NM_001884    | HAPLN1  | chr5  | 82948271  | 82948643  |
| LIT | NM_001884    | HAPLN1  | chr5  | 82969242  | 82969368  |
| LIT | NM_001884    | HAPLN1  | chr5  | 83016607  | 83016896  |
| CNV | NM_021072    | HCN1    | chr5  | 45255051  | 45262912  |
| CNV | NM_021072    | HCN1    | chr5  | 45267190  | 45267355  |
| CNV | NM_021072    | HCN1    | chr5  | 45303700  | 45303941  |
| CNV | NM_021072    | HCN1    | chr5  | 45353201  | 45353348  |
| CNV | NM_021072    | HCN1    | chr5  | 45396593  | 45396812  |
| CNV | NM_021072    | HCN1    | chr5  | 45461947  | 45462109  |
| CNV | NM_021072    | HCN1    | chr5  | 45645286  | 45645710  |
| CNV | NM_021072    | HCN1    | chr5  | 45695770  | 45696220  |
| LIT | NM_001098416 | HDAC7   | chr12 | 48176506  | 48177669  |
| LIT | NM_001098416 | HDAC7   | chr12 | 48177861  | 48178000  |
| LIT | NM_001098416 | HDAC7   | chr12 | 48179169  | 48179254  |
| LIT | NM_001098416 | HDAC7   | chr12 | 48179534  | 48179668  |
| LIT | NM_001098416 | HDAC7   | chr12 | 48180367  | 48180486  |
| LIT | NM_001098416 | HDAC7   | chr12 | 48181494  | 48181592  |
| LIT | NM_001098416 | HDAC7   | chr12 | 48181827  | 48181947  |
| LIT | NM_001098416 | HDAC7   | chr12 | 48183043  | 48183131  |
| LIT | NM_001098416 | HDAC7   | chr12 | 48183305  | 48183361  |
| LIT | NM_001098416 | HDAC7   | chr12 | 48183595  | 48183703  |
| LIT | NM_001098416 | HDAC7   | chr12 | 48185041  | 48185091  |
| LIT | NM_001098416 | HDAC7   | chr12 | 48185368  | 48185489  |
| LIT | NM_001098416 | HDAC7   | chr12 | 48185653  | 48185787  |
| LIT | NM_001098416 | HDAC7   | chr12 | 48187151  | 48187371  |
| LIT | NM_001098416 | HDAC7   | chr12 | 48188542  | 48188716  |
| LIT | NM_001098416 | HDAC7   | chr12 | 48188966  | 48189163  |
| LIT | NM_001098416 | HDAC7   | chr12 | 48189369  | 48189550  |
| LIT | NM_001098416 | HDAC7   | chr12 | 48189989  | 48190081  |
| LIT | NM_001098416 | HDAC7   | chr12 | 48190799  | 48190925  |
| LIT | NM_001098416 | HDAC7   | chr12 | 48191166  | 48191282  |
| LIT | NM_001098416 | HDAC7   | chr12 | 48191890  | 48192002  |
| LIT | NM_001098416 | HDAC7   | chr12 | 48192344  | 48192435  |
| LIT | NM_001098416 | HDAC7   | chr12 | 48192567  | 48192755  |
| LIT | NM_001098416 | HDAC7   | chr12 | 48196006  | 48196057  |

|     |              |        |       |          |          |
|-----|--------------|--------|-------|----------|----------|
| LIT | NM_001098416 | HDAC7  | chr12 | 48213549 | 48213763 |
| SMG | NM_022070    | HEATR6 | chr17 | 58120551 | 58121495 |
| SMG | NM_022070    | HEATR6 | chr17 | 58123385 | 58123590 |
| SMG | NM_022070    | HEATR6 | chr17 | 58124669 | 58124766 |
| SMG | NM_022070    | HEATR6 | chr17 | 58125624 | 58125749 |
| SMG | NM_022070    | HEATR6 | chr17 | 58126940 | 58127063 |
| SMG | NM_022070    | HEATR6 | chr17 | 58128203 | 58128338 |
| SMG | NM_022070    | HEATR6 | chr17 | 58132875 | 58132962 |
| SMG | NM_022070    | HEATR6 | chr17 | 58133475 | 58133598 |
| SMG | NM_022070    | HEATR6 | chr17 | 58134408 | 58134764 |
| SMG | NM_022070    | HEATR6 | chr17 | 58136782 | 58136882 |
| SMG | NM_022070    | HEATR6 | chr17 | 58137250 | 58137457 |
| SMG | NM_022070    | HEATR6 | chr17 | 58143569 | 58143747 |
| SMG | NM_022070    | HEATR6 | chr17 | 58144794 | 58145093 |
| SMG | NM_022070    | HEATR6 | chr17 | 58147071 | 58147209 |
| SMG | NM_022070    | HEATR6 | chr17 | 58148066 | 58148168 |
| SMG | NM_022070    | HEATR6 | chr17 | 58149575 | 58149690 |
| SMG | NM_022070    | HEATR6 | chr17 | 58150524 | 58150640 |
| SMG | NM_022070    | HEATR6 | chr17 | 58151106 | 58151247 |
| SMG | NM_022070    | HEATR6 | chr17 | 58153490 | 58153598 |
| SMG | NM_022070    | HEATR6 | chr17 | 58156056 | 58156292 |
| SMG | NM_014877    | HELZ   | chr17 | 65066553 | 65074702 |
| SMG | NM_014877    | HELZ   | chr17 | 65082944 | 65083197 |
| SMG | NM_014877    | HELZ   | chr17 | 65103284 | 65103801 |
| SMG | NM_014877    | HELZ   | chr17 | 65104607 | 65104842 |
| SMG | NM_014877    | HELZ   | chr17 | 65105231 | 65105802 |
| SMG | NM_014877    | HELZ   | chr17 | 65110439 | 65110519 |
| SMG | NM_014877    | HELZ   | chr17 | 65116520 | 65116728 |
| SMG | NM_014877    | HELZ   | chr17 | 65119085 | 65119276 |
| SMG | NM_014877    | HELZ   | chr17 | 65120078 | 65120130 |
| SMG | NM_014877    | HELZ   | chr17 | 65124766 | 65124971 |
| SMG | NM_014877    | HELZ   | chr17 | 65132085 | 65132314 |
| SMG | NM_014877    | HELZ   | chr17 | 65134046 | 65134230 |
| SMG | NM_014877    | HELZ   | chr17 | 65141858 | 65142006 |
| SMG | NM_014877    | HELZ   | chr17 | 65144684 | 65144830 |
| SMG | NM_014877    | HELZ   | chr17 | 65145982 | 65146101 |
| SMG | NM_014877    | HELZ   | chr17 | 65147161 | 65147340 |
| SMG | NM_014877    | HELZ   | chr17 | 65156376 | 65156478 |
| SMG | NM_014877    | HELZ   | chr17 | 65157012 | 65157192 |
| SMG | NM_014877    | HELZ   | chr17 | 65162593 | 65162724 |
| SMG | NM_014877    | HELZ   | chr17 | 65163578 | 65163912 |
| SMG | NM_014877    | HELZ   | chr17 | 65174774 | 65175042 |
| SMG | NM_014877    | HELZ   | chr17 | 65184434 | 65184732 |

|     |              |          |       |          |          |
|-----|--------------|----------|-------|----------|----------|
| SMG | NM_014877    | HELZ     | chr17 | 65185704 | 65185812 |
| SMG | NM_014877    | HELZ     | chr17 | 65186272 | 65186471 |
| SMG | NM_014877    | HELZ     | chr17 | 65190082 | 65190158 |
| SMG | NM_014877    | HELZ     | chr17 | 65191534 | 65191586 |
| SMG | NM_014877    | HELZ     | chr17 | 65197244 | 65197301 |
| SMG | NM_014877    | HELZ     | chr17 | 65199434 | 65199559 |
| SMG | NM_014877    | HELZ     | chr17 | 65212014 | 65212051 |
| SMG | NM_014877    | HELZ     | chr17 | 65214710 | 65214938 |
| SMG | NM_014877    | HELZ     | chr17 | 65235548 | 65235605 |
| SMG | NM_014877    | HELZ     | chr17 | 65239899 | 65239955 |
| SMG | NM_014877    | HELZ     | chr17 | 65241263 | 65241319 |
| CNV | NR_036432    | HERC2P3  | chr15 | 20613649 | 20613982 |
| CNV | NR_036432    | HERC2P3  | chr15 | 20636345 | 20636488 |
| CNV | NR_036432    | HERC2P3  | chr15 | 20641101 | 20641245 |
| CNV | NR_036432    | HERC2P3  | chr15 | 20642546 | 20642685 |
| CNV | NR_036432    | HERC2P3  | chr15 | 20643844 | 20644075 |
| CNV | NR_036432    | HERC2P3  | chr15 | 20644179 | 20644376 |
| CNV | NR_036432    | HERC2P3  | chr15 | 20644760 | 20644908 |
| CNV | NR_036432    | HERC2P3  | chr15 | 20645726 | 20645895 |
| CNV | NR_036432    | HERC2P3  | chr15 | 20648623 | 20648774 |
| CNV | NR_036432    | HERC2P3  | chr15 | 20649479 | 20649672 |
| CNV | NR_036432    | HERC2P3  | chr15 | 20651111 | 20651299 |
| CNV | NR_036432    | HERC2P3  | chr15 | 20657620 | 20657812 |
| CNV | NR_036432    | HERC2P3  | chr15 | 20658603 | 20658755 |
| CNV | NR_036432    | HERC2P3  | chr15 | 20658872 | 20659015 |
| CNV | NR_036432    | HERC2P3  | chr15 | 20659092 | 20659263 |
| CNV | NR_036432    | HERC2P3  | chr15 | 20659792 | 20659926 |
| CNV | NR_036432    | HERC2P3  | chr15 | 20662557 | 20662753 |
| CNV | NR_036432    | HERC2P3  | chr15 | 20662845 | 20662973 |
| CNV | NR_036432    | HERC2P3  | chr15 | 20663079 | 20663212 |
| CNV | NR_036432    | HERC2P3  | chr15 | 20663485 | 20663700 |
| CNV | NR_036432    | HERC2P3  | chr15 | 20666444 | 20666595 |
| CNV | NR_036432    | HERC2P3  | chr15 | 20667595 | 20667699 |
| CNV | NR_036432    | HERC2P3  | chr15 | 20668083 | 20668254 |
| CNV | NR_036432    | HERC2P3  | chr15 | 20671447 | 20671623 |
| CNV | NR_036432    | HERC2P3  | chr15 | 20710643 | 20710746 |
| CNV | NR_036432    | HERC2P3  | chr15 | 20711360 | 20711433 |
| LIT | NM_005322    | HIST1H1B | chr6  | 27834569 | 27835359 |
| SMG | NM_001127714 | HIVEP3   | chr1  | 41972035 | 41976934 |
| SMG | NM_001127714 | HIVEP3   | chr1  | 41978486 | 41979421 |
| SMG | NM_001127714 | HIVEP3   | chr1  | 41984072 | 41984159 |
| SMG | NM_001127714 | HIVEP3   | chr1  | 41990405 | 41990581 |
| SMG | NM_001127714 | HIVEP3   | chr1  | 42041214 | 42041360 |

|     |              |        |       |           |           |
|-----|--------------|--------|-------|-----------|-----------|
| SMG | NM_001127714 | HIVEP3 | chr1  | 42045407  | 42050989  |
| SMG | NM_001127714 | HIVEP3 | chr1  | 42094419  | 42094618  |
| SMG | NM_001127714 | HIVEP3 | chr1  | 42384083  | 42384378  |
| CNV | NM_030789    | HM13   | chr20 | 30102212  | 30102537  |
| CNV | NM_030789    | HM13   | chr20 | 30115286  | 30115385  |
| CNV | NM_030789    | HM13   | chr20 | 30125981  | 30126064  |
| CNV | NM_030789    | HM13   | chr20 | 30132749  | 30132838  |
| CNV | NM_030789    | HM13   | chr20 | 30136831  | 30136917  |
| CNV | NM_030789    | HM13   | chr20 | 30137009  | 30137135  |
| CNV | NM_030789    | HM13   | chr20 | 30137866  | 30137924  |
| CNV | NM_030789    | HM13   | chr20 | 30142548  | 30142632  |
| CNV | NM_030789    | HM13   | chr20 | 30147413  | 30147450  |
| CNV | NM_030789    | HM13   | chr20 | 30149436  | 30149539  |
| CNV | NM_030789    | HM13   | chr20 | 30154012  | 30154098  |
| CNV | NM_030789    | HM13   | chr20 | 30156922  | 30157370  |
| SMG | NM_030763    | HMG5   | chrX  | 80369199  | 80370729  |
| SMG | NM_030763    | HMG5   | chrX  | 80371702  | 80371840  |
| SMG | NM_030763    | HMG5   | chrX  | 80373930  | 80373984  |
| SMG | NM_030763    | HMG5   | chrX  | 80374228  | 80374258  |
| SMG | NM_030763    | HMG5   | chrX  | 80375286  | 80375316  |
| SMG | NM_030763    | HMG5   | chrX  | 80377033  | 80377171  |
| SMG | NM_030763    | HMG5   | chrX  | 80457235  | 80457441  |
| DRV | NM_000545    | HNF1A  | chr12 | 121416548 | 121416897 |
| DRV | NM_000545    | HNF1A  | chr12 | 121426635 | 121426835 |
| DRV | NM_000545    | HNF1A  | chr12 | 121431322 | 121431509 |
| DRV | NM_000545    | HNF1A  | chr12 | 121431966 | 121432208 |
| DRV | NM_000545    | HNF1A  | chr12 | 121434064 | 121434216 |
| DRV | NM_000545    | HNF1A  | chr12 | 121434343 | 121434545 |
| DRV | NM_000545    | HNF1A  | chr12 | 121435276 | 121435468 |
| DRV | NM_000545    | HNF1A  | chr12 | 121437070 | 121437192 |
| DRV | NM_000545    | HNF1A  | chr12 | 121437285 | 121437430 |
| DRV | NM_000545    | HNF1A  | chr12 | 121438867 | 121440314 |
| CNV | NM_006895    | HNMT   | chr2  | 138721807 | 138722198 |
| CNV | NM_006895    | HNMT   | chr2  | 138727734 | 138727787 |
| CNV | NM_006895    | HNMT   | chr2  | 138758487 | 138758595 |
| CNV | NM_006895    | HNMT   | chr2  | 138759633 | 138759764 |
| CNV | NM_006895    | HNMT   | chr2  | 138762701 | 138762795 |
| CNV | NM_006895    | HNMT   | chr2  | 138771344 | 138773934 |
| SMG | NM_194247    | HNRNP3 | chr2  | 178077421 | 178077599 |
| SMG | NM_194247    | HNRNP3 | chr2  | 178080266 | 178080389 |
| SMG | NM_194247    | HNRNP3 | chr2  | 178080477 | 178080624 |
| SMG | NM_194247    | HNRNP3 | chr2  | 178080705 | 178080916 |
| SMG | NM_194247    | HNRNP3 | chr2  | 178081230 | 178081320 |

|     |              |         |       |           |           |
|-----|--------------|---------|-------|-----------|-----------|
| SMG | NM_194247    | HNRNPA3 | chr2  | 178081403 | 178081499 |
| SMG | NM_194247    | HNRNPA3 | chr2  | 178081587 | 178081668 |
| SMG | NM_194247    | HNRNPA3 | chr2  | 178082432 | 178082573 |
| SMG | NM_194247    | HNRNPA3 | chr2  | 178083764 | 178083887 |
| SMG | NM_194247    | HNRNPA3 | chr2  | 178083974 | 178084042 |
| SMG | NM_194247    | HNRNPA3 | chr2  | 178084135 | 178088685 |
| SMG | NM_001098204 | HNRNPF  | chr10 | 43881064  | 43883384  |
| SMG | NM_001098204 | HNRNPF  | chr10 | 43890077  | 43890136  |
| SMG | NM_001098204 | HNRNPF  | chr10 | 43891903  | 43892038  |
| SMG | NM_001098204 | HNRNPF  | chr10 | 43904578  | 43904696  |
| SMG | NM_017410    | HOXC13  | chr12 | 54332575  | 54333426  |
| SMG | NM_017410    | HOXC13  | chr12 | 54338783  | 54340328  |
| SMG | NM_001142777 | HSD3B7  | chr16 | 30996518  | 30996618  |
| SMG | NM_001142777 | HSD3B7  | chr16 | 30996780  | 30997145  |
| SMG | NM_001142777 | HSD3B7  | chr16 | 30997369  | 30997525  |
| SMG | NM_001142777 | HSD3B7  | chr16 | 30997743  | 30997852  |
| SMG | NM_001142777 | HSD3B7  | chr16 | 30997925  | 30998025  |
| SMG | NM_001142777 | HSD3B7  | chr16 | 30999088  | 31000473  |
| SMG | NM_005527    | HSPA1L  | chr6  | 31777395  | 31779762  |
| SMG | NM_005527    | HSPA1L  | chr6  | 31782665  | 31782835  |
| SMG | NM_006597    | HSPA8   | chr11 | 122928199 | 122928627 |
| SMG | NM_006597    | HSPA8   | chr11 | 122928959 | 122929192 |
| SMG | NM_006597    | HSPA8   | chr11 | 122929339 | 122929538 |
| SMG | NM_006597    | HSPA8   | chr11 | 122929766 | 122929969 |
| SMG | NM_006597    | HSPA8   | chr11 | 122930180 | 122930736 |
| SMG | NM_006597    | HSPA8   | chr11 | 122930823 | 122930976 |
| SMG | NM_006597    | HSPA8   | chr11 | 122931300 | 122931506 |
| SMG | NM_006597    | HSPA8   | chr11 | 122931827 | 122932037 |
| SMG | NM_006597    | HSPA8   | chr11 | 122932771 | 122933043 |
| SMG | NM_000865    | HTR1E   | chr6  | 87647023  | 87647541  |
| SMG | NM_000865    | HTR1E   | chr6  | 87724867  | 87726397  |
| SMG | NM_006028    | HTR3B   | chr11 | 113775517 | 113775707 |
| SMG | NM_006028    | HTR3B   | chr11 | 113780016 | 113780177 |
| SMG | NM_006028    | HTR3B   | chr11 | 113802105 | 113802150 |
| SMG | NM_006028    | HTR3B   | chr11 | 113802479 | 113802589 |
| SMG | NM_006028    | HTR3B   | chr11 | 113803010 | 113803180 |
| SMG | NM_006028    | HTR3B   | chr11 | 113803657 | 113803815 |
| SMG | NM_006028    | HTR3B   | chr11 | 113813703 | 113813914 |
| SMG | NM_006028    | HTR3B   | chr11 | 113815294 | 113815477 |
| SMG | NM_006028    | HTR3B   | chr11 | 113816623 | 113817283 |
| SMG | NM_001276478 | ICA1    | chr7  | 8152814   | 8153674   |
| SMG | NM_001276478 | ICA1    | chr7  | 8167502   | 8167772   |
| SMG | NM_001276478 | ICA1    | chr7  | 8178469   | 8178511   |



|     |              |       |       |           |           |
|-----|--------------|-------|-------|-----------|-----------|
| SMG | NM_001276478 | ICA1  | chr7  | 8178614   | 8178677   |
| SMG | NM_001276478 | ICA1  | chr7  | 8181394   | 8181447   |
| SMG | NM_001276478 | ICA1  | chr7  | 8183504   | 8183602   |
| SMG | NM_001276478 | ICA1  | chr7  | 8196745   | 8196844   |
| SMG | NM_001276478 | ICA1  | chr7  | 8198156   | 8198282   |
| SMG | NM_001276478 | ICA1  | chr7  | 8257934   | 8258133   |
| SMG | NM_001276478 | ICA1  | chr7  | 8260904   | 8261028   |
| SMG | NM_001276478 | ICA1  | chr7  | 8268230   | 8268303   |
| SMG | NM_001276478 | ICA1  | chr7  | 8272219   | 8272382   |
| SMG | NM_001276478 | ICA1  | chr7  | 8275539   | 8275635   |
| SMG | NM_001276478 | ICA1  | chr7  | 8302069   | 8302242   |
| SMG | NM_002168    | IDH2  | chr15 | 90627211  | 90627585  |
| SMG | NM_002168    | IDH2  | chr15 | 90628047  | 90628140  |
| SMG | NM_002168    | IDH2  | chr15 | 90628232  | 90628330  |
| SMG | NM_002168    | IDH2  | chr15 | 90628506  | 90628619  |
| SMG | NM_002168    | IDH2  | chr15 | 90630343  | 90630495  |
| SMG | NM_002168    | IDH2  | chr15 | 90630670  | 90630807  |
| SMG | NM_002168    | IDH2  | chr15 | 90631590  | 90631734  |
| SMG | NM_002168    | IDH2  | chr15 | 90631818  | 90631979  |
| SMG | NM_002168    | IDH2  | chr15 | 90633710  | 90633876  |
| SMG | NM_002168    | IDH2  | chr15 | 90634784  | 90634876  |
| SMG | NM_002168    | IDH2  | chr15 | 90645507  | 90645708  |
| SMG | NM_001270927 | IFIT1 | chr10 | 91152302  | 91152474  |
| SMG | NM_001270927 | IFIT1 | chr10 | 91152863  | 91152960  |
| SMG | NM_001270927 | IFIT1 | chr10 | 91162037  | 91166244  |
| LIT | NM_000876    | IGF2R | chr6  | 160390130 | 160390427 |
| LIT | NM_000876    | IGF2R | chr6  | 160412215 | 160412355 |
| LIT | NM_000876    | IGF2R | chr6  | 160430041 | 160430166 |
| LIT | NM_000876    | IGF2R | chr6  | 160431718 | 160431817 |
| LIT | NM_000876    | IGF2R | chr6  | 160445603 | 160445736 |
| LIT | NM_000876    | IGF2R | chr6  | 160448216 | 160448346 |
| LIT | NM_000876    | IGF2R | chr6  | 160450581 | 160450687 |
| LIT | NM_000876    | IGF2R | chr6  | 160453582 | 160453745 |
| LIT | NM_000876    | IGF2R | chr6  | 160453973 | 160454139 |
| LIT | NM_000876    | IGF2R | chr6  | 160455450 | 160455554 |
| LIT | NM_000876    | IGF2R | chr6  | 160461591 | 160461756 |
| LIT | NM_000876    | IGF2R | chr6  | 160464179 | 160464320 |
| LIT | NM_000876    | IGF2R | chr6  | 160465545 | 160465689 |
| LIT | NM_000876    | IGF2R | chr6  | 160466776 | 160466914 |
| LIT | NM_000876    | IGF2R | chr6  | 160467529 | 160467677 |
| LIT | NM_000876    | IGF2R | chr6  | 160468190 | 160468368 |
| LIT | NM_000876    | IGF2R | chr6  | 160468823 | 160468939 |
| LIT | NM_000876    | IGF2R | chr6  | 160469406 | 160469575 |

|     |              |       |      |           |           |
|-----|--------------|-------|------|-----------|-----------|
| LIT | NM_000876    | IGF2R | chr6 | 160471504 | 160471684 |
| LIT | NM_000876    | IGF2R | chr6 | 160477455 | 160477557 |
| LIT | NM_000876    | IGF2R | chr6 | 160479054 | 160479156 |
| LIT | NM_000876    | IGF2R | chr6 | 160479937 | 160480130 |
| LIT | NM_000876    | IGF2R | chr6 | 160481578 | 160481749 |
| LIT | NM_000876    | IGF2R | chr6 | 160482534 | 160482678 |
| LIT | NM_000876    | IGF2R | chr6 | 160482784 | 160482960 |
| LIT | NM_000876    | IGF2R | chr6 | 160483563 | 160483651 |
| LIT | NM_000876    | IGF2R | chr6 | 160484446 | 160484662 |
| LIT | NM_000876    | IGF2R | chr6 | 160485432 | 160485563 |
| LIT | NM_000876    | IGF2R | chr6 | 160485835 | 160485933 |
| LIT | NM_000876    | IGF2R | chr6 | 160489280 | 160489417 |
| LIT | NM_000876    | IGF2R | chr6 | 160490899 | 160491090 |
| LIT | NM_000876    | IGF2R | chr6 | 160492941 | 160493068 |
| LIT | NM_000876    | IGF2R | chr6 | 160493796 | 160493916 |
| LIT | NM_000876    | IGF2R | chr6 | 160494244 | 160494501 |
| LIT | NM_000876    | IGF2R | chr6 | 160494788 | 160495007 |
| LIT | NM_000876    | IGF2R | chr6 | 160496878 | 160497028 |
| LIT | NM_000876    | IGF2R | chr6 | 160499232 | 160499394 |
| LIT | NM_000876    | IGF2R | chr6 | 160500611 | 160500819 |
| LIT | NM_000876    | IGF2R | chr6 | 160501160 | 160501307 |
| LIT | NM_000876    | IGF2R | chr6 | 160504981 | 160505216 |
| LIT | NM_000876    | IGF2R | chr6 | 160506026 | 160506163 |
| LIT | NM_000876    | IGF2R | chr6 | 160509064 | 160509179 |
| LIT | NM_000876    | IGF2R | chr6 | 160510138 | 160510285 |
| LIT | NM_000876    | IGF2R | chr6 | 160510947 | 160511135 |
| LIT | NM_000876    | IGF2R | chr6 | 160517470 | 160517657 |
| LIT | NM_000876    | IGF2R | chr6 | 160523550 | 160523703 |
| LIT | NM_000876    | IGF2R | chr6 | 160524777 | 160524847 |
| LIT | NM_000876    | IGF2R | chr6 | 160525705 | 160527583 |
| SMG | NM_144646    | IGJ   | chr4 | 71521257  | 71522256  |
| SMG | NM_144646    | IGJ   | chr4 | 71522927  | 71523008  |
| SMG | NM_144646    | IGJ   | chr4 | 71527808  | 71527932  |
| SMG | NM_144646    | IGJ   | chr4 | 71532143  | 71532348  |
| SMG | NM_001079526 | IKZF2 | chr2 | 213864410 | 213872808 |
| SMG | NM_001079526 | IKZF2 | chr2 | 213878514 | 213878658 |
| SMG | NM_001079526 | IKZF2 | chr2 | 213886716 | 213886854 |
| SMG | NM_001079526 | IKZF2 | chr2 | 213914436 | 213914604 |
| SMG | NM_001079526 | IKZF2 | chr2 | 213921634 | 213921823 |
| SMG | NM_001079526 | IKZF2 | chr2 | 214012431 | 214012536 |
| SMG | NM_001079526 | IKZF2 | chr2 | 214013319 | 214013368 |
| SMG | NM_001079526 | IKZF2 | chr2 | 214014867 | 214014971 |
| SMG | NM_001079526 | IKZF2 | chr2 | 214016136 | 214016333 |

|     |              |        |      |           |           |
|-----|--------------|--------|------|-----------|-----------|
| CNV | NM_153483    | IL17RE | chr3 | 9944295   | 9944376   |
| CNV | NM_153483    | IL17RE | chr3 | 9944573   | 9944748   |
| CNV | NM_153483    | IL17RE | chr3 | 9945080   | 9945096   |
| CNV | NM_153483    | IL17RE | chr3 | 9945715   | 9945835   |
| CNV | NM_153483    | IL17RE | chr3 | 9948047   | 9948145   |
| CNV | NM_153483    | IL17RE | chr3 | 9948389   | 9948549   |
| CNV | NM_153483    | IL17RE | chr3 | 9948644   | 9948784   |
| CNV | NM_153483    | IL17RE | chr3 | 9949922   | 9949991   |
| CNV | NM_153483    | IL17RE | chr3 | 9950900   | 9950967   |
| CNV | NM_153483    | IL17RE | chr3 | 9952548   | 9952724   |
| CNV | NM_153483    | IL17RE | chr3 | 9952810   | 9952858   |
| CNV | NM_153483    | IL17RE | chr3 | 9952938   | 9952984   |
| CNV | NM_153483    | IL17RE | chr3 | 9953126   | 9953281   |
| CNV | NM_153483    | IL17RE | chr3 | 9955639   | 9955708   |
| CNV | NM_153483    | IL17RE | chr3 | 9956231   | 9956283   |
| CNV | NM_153483    | IL17RE | chr3 | 9956362   | 9956461   |
| CNV | NM_153483    | IL17RE | chr3 | 9956934   | 9958084   |
| SMG | NM_001282399 | IL18R1 | chr2 | 102972742 | 102972860 |
| SMG | NM_001282399 | IL18R1 | chr2 | 102979092 | 102979178 |
| SMG | NM_001282399 | IL18R1 | chr2 | 102988412 | 102988578 |
| SMG | NM_001282399 | IL18R1 | chr2 | 102990396 | 102990453 |
| SMG | NM_001282399 | IL18R1 | chr2 | 102992366 | 102992523 |
| SMG | NM_001282399 | IL18R1 | chr2 | 102998079 | 102998142 |
| SMG | NM_001282399 | IL18R1 | chr2 | 103001337 | 103001458 |
| SMG | NM_001282399 | IL18R1 | chr2 | 103003320 | 103003460 |
| SMG | NM_001282399 | IL18R1 | chr2 | 103006518 | 103006677 |
| SMG | NM_001282399 | IL18R1 | chr2 | 103010928 | 103011087 |
| SMG | NM_001282399 | IL18R1 | chr2 | 103012990 | 103015235 |
| SMG | NM_000588    | IL3    | chr5 | 131396346 | 131396561 |
| SMG | NM_000588    | IL3    | chr5 | 131396659 | 131396701 |
| SMG | NM_000588    | IL3    | chr5 | 131398004 | 131398094 |
| SMG | NM_000588    | IL3    | chr5 | 131398218 | 131398260 |
| SMG | NM_000588    | IL3    | chr5 | 131398361 | 131398896 |
| CNV | NM_000564    | IL5RA  | chr3 | 3108007   | 3111995   |
| CNV | NM_000564    | IL5RA  | chr3 | 3116465   | 3116550   |
| CNV | NM_000564    | IL5RA  | chr3 | 3118214   | 3118311   |
| CNV | NM_000564    | IL5RA  | chr3 | 3133907   | 3134046   |
| CNV | NM_000564    | IL5RA  | chr3 | 3136982   | 3137128   |
| CNV | NM_000564    | IL5RA  | chr3 | 3139553   | 3139741   |
| CNV | NM_000564    | IL5RA  | chr3 | 3139820   | 3139974   |
| CNV | NM_000564    | IL5RA  | chr3 | 3143375   | 3143514   |
| CNV | NM_000564    | IL5RA  | chr3 | 3144358   | 3144504   |
| CNV | NM_000564    | IL5RA  | chr3 | 3146586   | 3146671   |

|     |              |          |       |           |           |
|-----|--------------|----------|-------|-----------|-----------|
| CNV | NM_000564    | IL5RA    | chr3  | 3147151   | 3147220   |
| CNV | NM_000564    | IL5RA    | chr3  | 3150233   | 3150375   |
| CNV | NM_000564    | IL5RA    | chr3  | 3151628   | 3152058   |
| CNV | NM_002185    | IL7R     | chr5  | 35856976  | 35857161  |
| CNV | NM_002185    | IL7R     | chr5  | 35860953  | 35861092  |
| CNV | NM_002185    | IL7R     | chr5  | 35867407  | 35867565  |
| CNV | NM_002185    | IL7R     | chr5  | 35871157  | 35871315  |
| CNV | NM_002185    | IL7R     | chr5  | 35873581  | 35873750  |
| CNV | NM_002185    | IL7R     | chr5  | 35874550  | 35874644  |
| CNV | NM_002185    | IL7R     | chr5  | 35875613  | 35875689  |
| CNV | NM_002185    | IL7R     | chr5  | 35876084  | 35879705  |
| SMG | NM_198217    | ING1     | chr13 | 111364969 | 111365324 |
| SMG | NM_198217    | ING1     | chr13 | 111371575 | 111373421 |
| SMG | NM_001017915 | INPP5D   | chr2  | 233925035 | 233925322 |
| SMG | NM_001017915 | INPP5D   | chr2  | 233944044 | 233944108 |
| SMG | NM_001017915 | INPP5D   | chr2  | 233986816 | 233986967 |
| SMG | NM_001017915 | INPP5D   | chr2  | 233990454 | 233990629 |
| SMG | NM_001017915 | INPP5D   | chr2  | 233995217 | 233995358 |
| SMG | NM_001017915 | INPP5D   | chr2  | 234054804 | 234054888 |
| SMG | NM_001017915 | INPP5D   | chr2  | 234055012 | 234055084 |
| SMG | NM_001017915 | INPP5D   | chr2  | 234056116 | 234056240 |
| SMG | NM_001017915 | INPP5D   | chr2  | 234066958 | 234067065 |
| SMG | NM_001017915 | INPP5D   | chr2  | 234070369 | 234070472 |
| SMG | NM_001017915 | INPP5D   | chr2  | 234072352 | 234072549 |
| SMG | NM_001017915 | INPP5D   | chr2  | 234072952 | 234073070 |
| SMG | NM_001017915 | INPP5D   | chr2  | 234077950 | 234078047 |
| SMG | NM_001017915 | INPP5D   | chr2  | 234078671 | 234078810 |
| SMG | NM_001017915 | INPP5D   | chr2  | 234079141 | 234079250 |
| SMG | NM_001017915 | INPP5D   | chr2  | 234079709 | 234079798 |
| SMG | NM_001017915 | INPP5D   | chr2  | 234085910 | 234085992 |
| SMG | NM_001017915 | INPP5D   | chr2  | 234091055 | 234091145 |
| SMG | NM_001017915 | INPP5D   | chr2  | 234093053 | 234093167 |
| SMG | NM_001017915 | INPP5D   | chr2  | 234094488 | 234094571 |
| SMG | NM_001017915 | INPP5D   | chr2  | 234098495 | 234098583 |
| SMG | NM_001017915 | INPP5D   | chr2  | 234102457 | 234102607 |
| SMG | NM_001017915 | INPP5D   | chr2  | 234104044 | 234104141 |
| SMG | NM_001017915 | INPP5D   | chr2  | 234106740 | 234107022 |
| SMG | NM_001017915 | INPP5D   | chr2  | 234112771 | 234113363 |
| SMG | NM_001017915 | INPP5D   | chr2  | 234115351 | 234116549 |
| CNV | NR_003512    | INS-IGF2 | chr11 | 2150341   | 2154453   |
| CNV | NR_003512    | INS-IGF2 | chr11 | 2154746   | 2154895   |
| CNV | NR_003512    | INS-IGF2 | chr11 | 2156596   | 2156759   |
| CNV | NR_003512    | INS-IGF2 | chr11 | 2168795   | 2169037   |

|     |           |          |       |          |          |
|-----|-----------|----------|-------|----------|----------|
| CNV | NR_003512 | INS-IGF2 | chr11 | 2170355  | 2170575  |
| CNV | NR_003512 | INS-IGF2 | chr11 | 2182014  | 2182218  |
| CNV | NR_003512 | INS-IGF2 | chr11 | 2182397  | 2182439  |
| SMG | NM_007179 | INSL6    | chr9  | 5163862  | 5164265  |
| SMG | NM_007179 | INSL6    | chr9  | 5185313  | 5185618  |
| CNV | NM_000208 | INSR     | chr19 | 7112265  | 7117421  |
| CNV | NM_000208 | INSR     | chr19 | 7119459  | 7119594  |
| CNV | NM_000208 | INSR     | chr19 | 7120630  | 7120760  |
| CNV | NM_000208 | INSR     | chr19 | 7122624  | 7122784  |
| CNV | NM_000208 | INSR     | chr19 | 7122889  | 7123000  |
| CNV | NM_000208 | INSR     | chr19 | 7125293  | 7125538  |
| CNV | NM_000208 | INSR     | chr19 | 7126594  | 7126662  |
| CNV | NM_000208 | INSR     | chr19 | 7128862  | 7128965  |
| CNV | NM_000208 | INSR     | chr19 | 7132168  | 7132328  |
| CNV | NM_000208 | INSR     | chr19 | 7141687  | 7141827  |
| CNV | NM_000208 | INSR     | chr19 | 7142826  | 7143101  |
| CNV | NM_000208 | INSR     | chr19 | 7150507  | 7150543  |
| CNV | NM_000208 | INSR     | chr19 | 7152736  | 7152938  |
| CNV | NM_000208 | INSR     | chr19 | 7163042  | 7163210  |
| CNV | NM_000208 | INSR     | chr19 | 7166164  | 7166415  |
| CNV | NM_000208 | INSR     | chr19 | 7167978  | 7168105  |
| CNV | NM_000208 | INSR     | chr19 | 7170547  | 7170762  |
| CNV | NM_000208 | INSR     | chr19 | 7172300  | 7172445  |
| CNV | NM_000208 | INSR     | chr19 | 7174593  | 7174742  |
| CNV | NM_000208 | INSR     | chr19 | 7184326  | 7184648  |
| CNV | NM_000208 | INSR     | chr19 | 7267355  | 7267907  |
| CNV | NM_000208 | INSR     | chr19 | 7293802  | 7294011  |
| SMG | NM_033547 | INTS4    | chr11 | 77589765 | 77590173 |
| SMG | NM_033547 | INTS4    | chr11 | 77594877 | 77594998 |
| SMG | NM_033547 | INTS4    | chr11 | 77602364 | 77602508 |
| SMG | NM_033547 | INTS4    | chr11 | 77602726 | 77602886 |
| SMG | NM_033547 | INTS4    | chr11 | 77605335 | 77605395 |
| SMG | NM_033547 | INTS4    | chr11 | 77612466 | 77612597 |
| SMG | NM_033547 | INTS4    | chr11 | 77614585 | 77614666 |
| SMG | NM_033547 | INTS4    | chr11 | 77618762 | 77618856 |
| SMG | NM_033547 | INTS4    | chr11 | 77629866 | 77630024 |
| SMG | NM_033547 | INTS4    | chr11 | 77632385 | 77632519 |
| SMG | NM_033547 | INTS4    | chr11 | 77633401 | 77633517 |
| SMG | NM_033547 | INTS4    | chr11 | 77635795 | 77635938 |
| SMG | NM_033547 | INTS4    | chr11 | 77639387 | 77639593 |
| SMG | NM_033547 | INTS4    | chr11 | 77649696 | 77649871 |
| SMG | NM_033547 | INTS4    | chr11 | 77652225 | 77652297 |
| SMG | NM_033547 | INTS4    | chr11 | 77666987 | 77667108 |

|     |           |       |       |           |           |
|-----|-----------|-------|-------|-----------|-----------|
| SMG | NM_033547 | INTS4 | chr11 | 77669791  | 77669880  |
| SMG | NM_033547 | INTS4 | chr11 | 77671386  | 77671437  |
| SMG | NM_033547 | INTS4 | chr11 | 77671998  | 77672184  |
| SMG | NM_033547 | INTS4 | chr11 | 77690041  | 77690148  |
| SMG | NM_033547 | INTS4 | chr11 | 77692504  | 77692622  |
| SMG | NM_033547 | INTS4 | chr11 | 77702153  | 77702345  |
| SMG | NM_033547 | INTS4 | chr11 | 77705635  | 77705717  |
| SMG | NM_153208 | IQCK  | chr16 | 19727777  | 19727864  |
| SMG | NM_153208 | IQCK  | chr16 | 19729016  | 19729809  |
| SMG | NM_153208 | IQCK  | chr16 | 19741751  | 19741816  |
| SMG | NM_153208 | IQCK  | chr16 | 19745019  | 19745149  |
| SMG | NM_153208 | IQCK  | chr16 | 19746674  | 19746772  |
| SMG | NM_153208 | IQCK  | chr16 | 19775169  | 19775222  |
| SMG | NM_153208 | IQCK  | chr16 | 19775356  | 19775434  |
| SMG | NM_153208 | IQCK  | chr16 | 19800159  | 19800244  |
| SMG | NM_153208 | IQCK  | chr16 | 19838347  | 19838459  |
| SMG | NM_153208 | IQCK  | chr16 | 19867808  | 19868859  |
| CNV | NM_001570 | IRAK2 | chr3  | 10206562  | 10206732  |
| CNV | NM_001570 | IRAK2 | chr3  | 10219521  | 10219704  |
| CNV | NM_001570 | IRAK2 | chr3  | 10242052  | 10242199  |
| CNV | NM_001570 | IRAK2 | chr3  | 10251272  | 10251376  |
| CNV | NM_001570 | IRAK2 | chr3  | 10254890  | 10255085  |
| CNV | NM_001570 | IRAK2 | chr3  | 10255167  | 10255232  |
| CNV | NM_001570 | IRAK2 | chr3  | 10258617  | 10258732  |
| CNV | NM_001570 | IRAK2 | chr3  | 10261363  | 10261473  |
| CNV | NM_001570 | IRAK2 | chr3  | 10264319  | 10264515  |
| CNV | NM_001570 | IRAK2 | chr3  | 10268054  | 10268117  |
| CNV | NM_001570 | IRAK2 | chr3  | 10276142  | 10276343  |
| CNV | NM_001570 | IRAK2 | chr3  | 10280431  | 10280723  |
| CNV | NM_001570 | IRAK2 | chr3  | 10283799  | 10285427  |
| LIT | NM_003749 | IRS2  | chr13 | 110406183 | 110408655 |
| LIT | NM_003749 | IRS2  | chr13 | 110434388 | 110438914 |
| SMG | NM_002202 | ISL1  | chr5  | 50678957  | 50679533  |
| SMG | NM_002202 | ISL1  | chr5  | 50680374  | 50680564  |
| SMG | NM_002202 | ISL1  | chr5  | 50683323  | 50683583  |
| SMG | NM_002202 | ISL1  | chr5  | 50685479  | 50685766  |
| SMG | NM_002202 | ISL1  | chr5  | 50687107  | 50687275  |
| SMG | NM_002202 | ISL1  | chr5  | 50689327  | 50690563  |
| SMG | NM_002215 | ITIH1 | chr3  | 52811601  | 52811748  |
| SMG | NM_002215 | ITIH1 | chr3  | 52812012  | 52812033  |
| SMG | NM_002215 | ITIH1 | chr3  | 52812355  | 52812522  |
| SMG | NM_002215 | ITIH1 | chr3  | 52812957  | 52813062  |
| SMG | NM_002215 | ITIH1 | chr3  | 52813447  | 52813610  |

|     |              |       |      |           |           |
|-----|--------------|-------|------|-----------|-----------|
| SMG | NM_002215    | ITIH1 | chr3 | 52814284  | 52814398  |
| SMG | NM_002215    | ITIH1 | chr3 | 52815955  | 52816081  |
| SMG | NM_002215    | ITIH1 | chr3 | 52816166  | 52816283  |
| SMG | NM_002215    | ITIH1 | chr3 | 52816972  | 52817141  |
| SMG | NM_002215    | ITIH1 | chr3 | 52817229  | 52817355  |
| SMG | NM_002215    | ITIH1 | chr3 | 52818311  | 52818493  |
| SMG | NM_002215    | ITIH1 | chr3 | 52819059  | 52819245  |
| SMG | NM_002215    | ITIH1 | chr3 | 52820310  | 52820450  |
| SMG | NM_002215    | ITIH1 | chr3 | 52820960  | 52821115  |
| SMG | NM_002215    | ITIH1 | chr3 | 52821203  | 52821218  |
| SMG | NM_002215    | ITIH1 | chr3 | 52821607  | 52821628  |
| SMG | NM_002215    | ITIH1 | chr3 | 52822001  | 52822082  |
| SMG | NM_002215    | ITIH1 | chr3 | 52822247  | 52822361  |
| SMG | NM_002215    | ITIH1 | chr3 | 52823668  | 52823870  |
| SMG | NM_002215    | ITIH1 | chr3 | 52824764  | 52824937  |
| SMG | NM_002215    | ITIH1 | chr3 | 52825532  | 52825644  |
| SMG | NM_002215    | ITIH1 | chr3 | 52825797  | 52826084  |
| SMG | NM_005546    | ITK   | chr5 | 156607906 | 156608126 |
| SMG | NM_005546    | ITK   | chr5 | 156635899 | 156636004 |
| SMG | NM_005546    | ITK   | chr5 | 156638297 | 156638379 |
| SMG | NM_005546    | ITK   | chr5 | 156641201 | 156641330 |
| SMG | NM_005546    | ITK   | chr5 | 156644876 | 156644917 |
| SMG | NM_005546    | ITK   | chr5 | 156649872 | 156650024 |
| SMG | NM_005546    | ITK   | chr5 | 156655305 | 156655371 |
| SMG | NM_005546    | ITK   | chr5 | 156659349 | 156659404 |
| SMG | NM_005546    | ITK   | chr5 | 156665118 | 156665201 |
| SMG | NM_005546    | ITK   | chr5 | 156667071 | 156667205 |
| SMG | NM_005546    | ITK   | chr5 | 156668655 | 156668730 |
| SMG | NM_005546    | ITK   | chr5 | 156670632 | 156670804 |
| SMG | NM_005546    | ITK   | chr5 | 156671271 | 156671488 |
| SMG | NM_005546    | ITK   | chr5 | 156672735 | 156672800 |
| SMG | NM_005546    | ITK   | chr5 | 156672890 | 156673009 |
| SMG | NM_005546    | ITK   | chr5 | 156675859 | 156676017 |
| SMG | NM_005546    | ITK   | chr5 | 156679616 | 156682109 |
| CNV | NM_001099952 | ITPR1 | chr3 | 4535031   | 4535289   |
| CNV | NM_001099952 | ITPR1 | chr3 | 4536114   | 4536190   |
| CNV | NM_001099952 | ITPR1 | chr3 | 4558159   | 4558267   |
| CNV | NM_001099952 | ITPR1 | chr3 | 4562707   | 4562778   |
| CNV | NM_001099952 | ITPR1 | chr3 | 4669446   | 4669562   |
| CNV | NM_001099952 | ITPR1 | chr3 | 4681067   | 4681154   |
| CNV | NM_001099952 | ITPR1 | chr3 | 4683776   | 4683935   |
| CNV | NM_001099952 | ITPR1 | chr3 | 4685819   | 4685918   |
| CNV | NM_001099952 | ITPR1 | chr3 | 4687070   | 4687154   |

|     |              |       |      |         |         |
|-----|--------------|-------|------|---------|---------|
| CNV | NM_001099952 | ITPR1 | chr3 | 4687265 | 4687412 |
| CNV | NM_001099952 | ITPR1 | chr3 | 4693806 | 4693902 |
| CNV | NM_001099952 | ITPR1 | chr3 | 4695525 | 4695570 |
| CNV | NM_001099952 | ITPR1 | chr3 | 4699807 | 4699962 |
| CNV | NM_001099952 | ITPR1 | chr3 | 4702671 | 4702771 |
| CNV | NM_001099952 | ITPR1 | chr3 | 4703765 | 4703926 |
| CNV | NM_001099952 | ITPR1 | chr3 | 4704748 | 4704890 |
| CNV | NM_001099952 | ITPR1 | chr3 | 4706821 | 4706980 |
| CNV | NM_001099952 | ITPR1 | chr3 | 4709060 | 4709233 |
| CNV | NM_001099952 | ITPR1 | chr3 | 4711337 | 4711457 |
| CNV | NM_001099952 | ITPR1 | chr3 | 4712412 | 4712610 |
| CNV | NM_001099952 | ITPR1 | chr3 | 4714819 | 4715071 |
| CNV | NM_001099952 | ITPR1 | chr3 | 4715885 | 4716027 |
| CNV | NM_001099952 | ITPR1 | chr3 | 4716751 | 4716905 |
| CNV | NM_001099952 | ITPR1 | chr3 | 4718297 | 4718485 |
| CNV | NM_001099952 | ITPR1 | chr3 | 4722236 | 4722375 |
| CNV | NM_001099952 | ITPR1 | chr3 | 4723047 | 4723102 |
| CNV | NM_001099952 | ITPR1 | chr3 | 4725069 | 4725235 |
| CNV | NM_001099952 | ITPR1 | chr3 | 4725311 | 4725482 |
| CNV | NM_001099952 | ITPR1 | chr3 | 4725964 | 4726030 |
| CNV | NM_001099952 | ITPR1 | chr3 | 4726752 | 4726890 |
| CNV | NM_001099952 | ITPR1 | chr3 | 4730178 | 4730304 |
| CNV | NM_001099952 | ITPR1 | chr3 | 4732827 | 4733028 |
| CNV | NM_001099952 | ITPR1 | chr3 | 4735173 | 4735425 |
| CNV | NM_001099952 | ITPR1 | chr3 | 4738830 | 4738956 |
| CNV | NM_001099952 | ITPR1 | chr3 | 4741496 | 4741625 |
| CNV | NM_001099952 | ITPR1 | chr3 | 4744513 | 4744634 |
| CNV | NM_001099952 | ITPR1 | chr3 | 4747850 | 4748035 |
| CNV | NM_001099952 | ITPR1 | chr3 | 4752008 | 4752157 |
| CNV | NM_001099952 | ITPR1 | chr3 | 4753440 | 4753552 |
| CNV | NM_001099952 | ITPR1 | chr3 | 4774771 | 4774904 |
| CNV | NM_001099952 | ITPR1 | chr3 | 4776847 | 4777038 |
| CNV | NM_001099952 | ITPR1 | chr3 | 4808213 | 4808394 |
| CNV | NM_001099952 | ITPR1 | chr3 | 4810194 | 4810448 |
| CNV | NM_001099952 | ITPR1 | chr3 | 4816925 | 4817126 |
| CNV | NM_001099952 | ITPR1 | chr3 | 4818947 | 4819058 |
| CNV | NM_001099952 | ITPR1 | chr3 | 4821233 | 4821329 |
| CNV | NM_001099952 | ITPR1 | chr3 | 4824302 | 4824425 |
| CNV | NM_001099952 | ITPR1 | chr3 | 4825499 | 4825604 |
| CNV | NM_001099952 | ITPR1 | chr3 | 4829630 | 4829823 |
| CNV | NM_001099952 | ITPR1 | chr3 | 4836748 | 4836871 |
| CNV | NM_001099952 | ITPR1 | chr3 | 4842108 | 4842284 |
| CNV | NM_001099952 | ITPR1 | chr3 | 4847786 | 4847951 |



|     |              |       |       |          |          |
|-----|--------------|-------|-------|----------|----------|
| CNV | NM_001099952 | ITPR1 | chr3  | 4852948  | 4853144  |
| CNV | NM_001099952 | ITPR1 | chr3  | 4854825  | 4854918  |
| CNV | NM_001099952 | ITPR1 | chr3  | 4856106  | 4856246  |
| CNV | NM_001099952 | ITPR1 | chr3  | 4856736  | 4856902  |
| CNV | NM_001099952 | ITPR1 | chr3  | 4859765  | 4859926  |
| CNV | NM_001099952 | ITPR1 | chr3  | 4878457  | 4878619  |
| CNV | NM_001099952 | ITPR1 | chr3  | 4887822  | 4889524  |
| DRV | NM_002227    | JAK1  | chr1  | 65298905 | 65300340 |
| DRV | NM_002227    | JAK1  | chr1  | 65301078 | 65301189 |
| DRV | NM_002227    | JAK1  | chr1  | 65301780 | 65301898 |
| DRV | NM_002227    | JAK1  | chr1  | 65303614 | 65303787 |
| DRV | NM_002227    | JAK1  | chr1  | 65304147 | 65304272 |
| DRV | NM_002227    | JAK1  | chr1  | 65305285 | 65305478 |
| DRV | NM_002227    | JAK1  | chr1  | 65306927 | 65307022 |
| DRV | NM_002227    | JAK1  | chr1  | 65307133 | 65307284 |
| DRV | NM_002227    | JAK1  | chr1  | 65309746 | 65309898 |
| DRV | NM_002227    | JAK1  | chr1  | 65310436 | 65310572 |
| DRV | NM_002227    | JAK1  | chr1  | 65311195 | 65311323 |
| DRV | NM_002227    | JAK1  | chr1  | 65312331 | 65312419 |
| DRV | NM_002227    | JAK1  | chr1  | 65313214 | 65313358 |
| DRV | NM_002227    | JAK1  | chr1  | 65316486 | 65316593 |
| DRV | NM_002227    | JAK1  | chr1  | 65321191 | 65321381 |
| DRV | NM_002227    | JAK1  | chr1  | 65323338 | 65323462 |
| DRV | NM_002227    | JAK1  | chr1  | 65325787 | 65325945 |
| DRV | NM_002227    | JAK1  | chr1  | 65330469 | 65330655 |
| DRV | NM_002227    | JAK1  | chr1  | 65332548 | 65332891 |
| DRV | NM_002227    | JAK1  | chr1  | 65334993 | 65335157 |
| DRV | NM_002227    | JAK1  | chr1  | 65339052 | 65339206 |
| DRV | NM_002227    | JAK1  | chr1  | 65344707 | 65344831 |
| DRV | NM_002227    | JAK1  | chr1  | 65348959 | 65349158 |
| DRV | NM_002227    | JAK1  | chr1  | 65351941 | 65352024 |
| DRV | NM_002227    | JAK1  | chr1  | 65432015 | 65432187 |
| DRV | NM_000215    | JAK3  | chr19 | 17935592 | 17937719 |
| DRV | NM_000215    | JAK3  | chr19 | 17940916 | 17941027 |
| DRV | NM_000215    | JAK3  | chr19 | 17941311 | 17941429 |
| DRV | NM_000215    | JAK3  | chr19 | 17942036 | 17942209 |
| DRV | NM_000215    | JAK3  | chr19 | 17942482 | 17942607 |
| DRV | NM_000215    | JAK3  | chr19 | 17943327 | 17943517 |
| DRV | NM_000215    | JAK3  | chr19 | 17943598 | 17943738 |
| DRV | NM_000215    | JAK3  | chr19 | 17945379 | 17945530 |
| DRV | NM_000215    | JAK3  | chr19 | 17945660 | 17945812 |
| DRV | NM_000215    | JAK3  | chr19 | 17945891 | 17946024 |
| DRV | NM_000215    | JAK3  | chr19 | 17946732 | 17946860 |

|     |              |       |       |          |          |
|-----|--------------|-------|-------|----------|----------|
| DRV | NM_000215    | JAK3  | chr19 | 17947937 | 17948022 |
| DRV | NM_000215    | JAK3  | chr19 | 17948740 | 17948872 |
| DRV | NM_000215    | JAK3  | chr19 | 17949071 | 17949199 |
| DRV | NM_000215    | JAK3  | chr19 | 17950285 | 17950472 |
| DRV | NM_000215    | JAK3  | chr19 | 17951038 | 17951150 |
| DRV | NM_000215    | JAK3  | chr19 | 17952197 | 17952355 |
| DRV | NM_000215    | JAK3  | chr19 | 17952448 | 17952571 |
| DRV | NM_000215    | JAK3  | chr19 | 17953124 | 17953419 |
| DRV | NM_000215    | JAK3  | chr19 | 17953835 | 17953981 |
| DRV | NM_000215    | JAK3  | chr19 | 17954188 | 17954300 |
| DRV | NM_000215    | JAK3  | chr19 | 17954585 | 17954709 |
| DRV | NM_000215    | JAK3  | chr19 | 17955042 | 17955239 |
| DRV | NM_000215    | JAK3  | chr19 | 17958754 | 17958841 |
| CNV | NM_003884    | KAT2B | chr3  | 20081523 | 20082272 |
| CNV | NM_003884    | KAT2B | chr3  | 20113824 | 20113951 |
| CNV | NM_003884    | KAT2B | chr3  | 20136754 | 20136900 |
| CNV | NM_003884    | KAT2B | chr3  | 20141353 | 20141446 |
| CNV | NM_003884    | KAT2B | chr3  | 20142778 | 20142960 |
| CNV | NM_003884    | KAT2B | chr3  | 20153087 | 20153279 |
| CNV | NM_003884    | KAT2B | chr3  | 20156373 | 20156480 |
| CNV | NM_003884    | KAT2B | chr3  | 20161089 | 20161215 |
| CNV | NM_003884    | KAT2B | chr3  | 20164159 | 20164296 |
| CNV | NM_003884    | KAT2B | chr3  | 20167396 | 20167605 |
| CNV | NM_003884    | KAT2B | chr3  | 20168914 | 20169041 |
| CNV | NM_003884    | KAT2B | chr3  | 20178433 | 20178544 |
| CNV | NM_003884    | KAT2B | chr3  | 20181712 | 20181856 |
| CNV | NM_003884    | KAT2B | chr3  | 20187807 | 20187922 |
| CNV | NM_003884    | KAT2B | chr3  | 20189454 | 20189491 |
| CNV | NM_003884    | KAT2B | chr3  | 20189734 | 20189798 |
| CNV | NM_003884    | KAT2B | chr3  | 20189894 | 20189979 |
| CNV | NM_003884    | KAT2B | chr3  | 20193823 | 20195896 |
| CNV | NM_001256468 | KAT6B | chr10 | 76586170 | 76586543 |
| CNV | NM_001256468 | KAT6B | chr10 | 76598440 | 76598510 |
| CNV | NM_001256468 | KAT6B | chr10 | 76602357 | 76603236 |
| CNV | NM_001256468 | KAT6B | chr10 | 76719727 | 76719836 |
| CNV | NM_001256468 | KAT6B | chr10 | 76729417 | 76729533 |
| CNV | NM_001256468 | KAT6B | chr10 | 76729777 | 76729859 |
| CNV | NM_001256468 | KAT6B | chr10 | 76732264 | 76732397 |
| CNV | NM_001256468 | KAT6B | chr10 | 76735156 | 76735539 |
| CNV | NM_001256468 | KAT6B | chr10 | 76737073 | 76737195 |
| CNV | NM_001256468 | KAT6B | chr10 | 76738981 | 76739097 |
| CNV | NM_001256468 | KAT6B | chr10 | 76741544 | 76741686 |
| CNV | NM_001256468 | KAT6B | chr10 | 76744837 | 76744999 |

|     |              |        |       |           |           |
|-----|--------------|--------|-------|-----------|-----------|
| CNV | NM_001256468 | KAT6B  | chr10 | 76748776  | 76748870  |
| CNV | NM_001256468 | KAT6B  | chr10 | 76780339  | 76780571  |
| CNV | NM_001256468 | KAT6B  | chr10 | 76780883  | 76781043  |
| CNV | NM_001256468 | KAT6B  | chr10 | 76781638  | 76781989  |
| CNV | NM_001256468 | KAT6B  | chr10 | 76784715  | 76785007  |
| CNV | NM_001256468 | KAT6B  | chr10 | 76788246  | 76792380  |
| SMG | NM_002232    | KCNA3  | chr1  | 111214309 | 111217655 |
| CNV | NM_144633    | KCNH8  | chr3  | 19190016  | 19190287  |
| CNV | NM_144633    | KCNH8  | chr3  | 19295145  | 19295379  |
| CNV | NM_144633    | KCNH8  | chr3  | 19322689  | 19322821  |
| CNV | NM_144633    | KCNH8  | chr3  | 19384078  | 19384206  |
| CNV | NM_144633    | KCNH8  | chr3  | 19389216  | 19389457  |
| CNV | NM_144633    | KCNH8  | chr3  | 19431972  | 19432130  |
| CNV | NM_144633    | KCNH8  | chr3  | 19436595  | 19436803  |
| CNV | NM_144633    | KCNH8  | chr3  | 19479655  | 19479853  |
| CNV | NM_144633    | KCNH8  | chr3  | 19491597  | 19491797  |
| CNV | NM_144633    | KCNH8  | chr3  | 19492646  | 19492896  |
| CNV | NM_144633    | KCNH8  | chr3  | 19498259  | 19498474  |
| CNV | NM_144633    | KCNH8  | chr3  | 19551854  | 19551893  |
| CNV | NM_144633    | KCNH8  | chr3  | 19554461  | 19554817  |
| CNV | NM_144633    | KCNH8  | chr3  | 19556813  | 19556920  |
| CNV | NM_144633    | KCNH8  | chr3  | 19559489  | 19559566  |
| CNV | NM_144633    | KCNH8  | chr3  | 19574886  | 19577135  |
| CNV | NM_001014797 | KCNMA1 | chr10 | 78629358  | 78637651  |
| CNV | NM_001014797 | KCNMA1 | chr10 | 78647048  | 78647273  |
| CNV | NM_001014797 | KCNMA1 | chr10 | 78649208  | 78649327  |
| CNV | NM_001014797 | KCNMA1 | chr10 | 78651282  | 78651477  |
| CNV | NM_001014797 | KCNMA1 | chr10 | 78669723  | 78669854  |
| CNV | NM_001014797 | KCNMA1 | chr10 | 78674693  | 78674807  |
| CNV | NM_001014797 | KCNMA1 | chr10 | 78704530  | 78704723  |
| CNV | NM_001014797 | KCNMA1 | chr10 | 78708899  | 78709124  |
| CNV | NM_001014797 | KCNMA1 | chr10 | 78713558  | 78713682  |
| CNV | NM_001014797 | KCNMA1 | chr10 | 78729731  | 78729825  |
| CNV | NM_001014797 | KCNMA1 | chr10 | 78771724  | 78771801  |
| CNV | NM_001014797 | KCNMA1 | chr10 | 78778770  | 78778857  |
| CNV | NM_001014797 | KCNMA1 | chr10 | 78785203  | 78785215  |
| CNV | NM_001014797 | KCNMA1 | chr10 | 78787580  | 78787649  |
| CNV | NM_001014797 | KCNMA1 | chr10 | 78799285  | 78799395  |
| CNV | NM_001014797 | KCNMA1 | chr10 | 78832854  | 78833010  |
| CNV | NM_001014797 | KCNMA1 | chr10 | 78839238  | 78839308  |
| CNV | NM_001014797 | KCNMA1 | chr10 | 78844394  | 78844477  |
| CNV | NM_001014797 | KCNMA1 | chr10 | 78846245  | 78846351  |
| CNV | NM_001014797 | KCNMA1 | chr10 | 78850157  | 78850268  |

|     |              |        |       |          |          |
|-----|--------------|--------|-------|----------|----------|
| CNV | NM_001014797 | KCNMA1 | chr10 | 78868238 | 78868330 |
| CNV | NM_001014797 | KCNMA1 | chr10 | 78869930 | 78870101 |
| CNV | NM_001014797 | KCNMA1 | chr10 | 78872124 | 78872200 |
| CNV | NM_001014797 | KCNMA1 | chr10 | 78880730 | 78880806 |
| CNV | NM_001014797 | KCNMA1 | chr10 | 78943178 | 78943290 |
| CNV | NM_001014797 | KCNMA1 | chr10 | 78944580 | 78944674 |
| CNV | NM_001014797 | KCNMA1 | chr10 | 79010952 | 79011014 |
| CNV | NM_001014797 | KCNMA1 | chr10 | 79163619 | 79163781 |
| CNV | NM_001014797 | KCNMA1 | chr10 | 79397022 | 79397577 |
| LIT | NM_001160130 | KCNQ5  | chr6  | 73331570 | 73332315 |
| LIT | NM_001160130 | KCNQ5  | chr6  | 73713630 | 73713721 |
| LIT | NM_001160130 | KCNQ5  | chr6  | 73751658 | 73751785 |
| LIT | NM_001160130 | KCNQ5  | chr6  | 73787044 | 73787220 |
| LIT | NM_001160130 | KCNQ5  | chr6  | 73787484 | 73787610 |
| LIT | NM_001160130 | KCNQ5  | chr6  | 73814979 | 73815090 |
| LIT | NM_001160130 | KCNQ5  | chr6  | 73821030 | 73821126 |
| LIT | NM_001160130 | KCNQ5  | chr6  | 73830205 | 73830300 |
| LIT | NM_001160130 | KCNQ5  | chr6  | 73843143 | 73843364 |
| LIT | NM_001160130 | KCNQ5  | chr6  | 73879468 | 73879577 |
| LIT | NM_001160130 | KCNQ5  | chr6  | 73900295 | 73900427 |
| LIT | NM_001160130 | KCNQ5  | chr6  | 73902287 | 73902414 |
| LIT | NM_001160130 | KCNQ5  | chr6  | 73904174 | 73908573 |
| SMG | NM_018433    | KDM3A  | chr2  | 86668270 | 86668567 |
| SMG | NM_018433    | KDM3A  | chr2  | 86669140 | 86669356 |
| SMG | NM_018433    | KDM3A  | chr2  | 86676929 | 86677085 |
| SMG | NM_018433    | KDM3A  | chr2  | 86678225 | 86678336 |
| SMG | NM_018433    | KDM3A  | chr2  | 86682207 | 86682310 |
| SMG | NM_018433    | KDM3A  | chr2  | 86683564 | 86683689 |
| SMG | NM_018433    | KDM3A  | chr2  | 86683927 | 86684000 |
| SMG | NM_018433    | KDM3A  | chr2  | 86684105 | 86684194 |
| SMG | NM_018433    | KDM3A  | chr2  | 86691175 | 86691339 |
| SMG | NM_018433    | KDM3A  | chr2  | 86693494 | 86694006 |
| SMG | NM_018433    | KDM3A  | chr2  | 86697326 | 86697531 |
| SMG | NM_018433    | KDM3A  | chr2  | 86701898 | 86702113 |
| SMG | NM_018433    | KDM3A  | chr2  | 86704999 | 86705152 |
| SMG | NM_018433    | KDM3A  | chr2  | 86705292 | 86705388 |
| SMG | NM_018433    | KDM3A  | chr2  | 86705730 | 86705858 |
| SMG | NM_018433    | KDM3A  | chr2  | 86707289 | 86707485 |
| SMG | NM_018433    | KDM3A  | chr2  | 86709052 | 86709225 |
| SMG | NM_018433    | KDM3A  | chr2  | 86709580 | 86709817 |
| SMG | NM_018433    | KDM3A  | chr2  | 86711109 | 86711281 |
| SMG | NM_018433    | KDM3A  | chr2  | 86712064 | 86712152 |
| SMG | NM_018433    | KDM3A  | chr2  | 86712851 | 86712982 |

|     |              |          |      |           |           |
|-----|--------------|----------|------|-----------|-----------|
| SMG | NM_018433    | KDM3A    | chr2 | 86716440  | 86716560  |
| SMG | NM_018433    | KDM3A    | chr2 | 86716642  | 86716782  |
| SMG | NM_018433    | KDM3A    | chr2 | 86718003  | 86718180  |
| SMG | NM_018433    | KDM3A    | chr2 | 86718263  | 86718398  |
| SMG | NM_018433    | KDM3A    | chr2 | 86719161  | 86719839  |
| SMG | NM_015325    | KIAA0947 | chr5 | 5422785   | 5423112   |
| SMG | NM_015325    | KIAA0947 | chr5 | 5436530   | 5436589   |
| SMG | NM_015325    | KIAA0947 | chr5 | 5437192   | 5437227   |
| SMG | NM_015325    | KIAA0947 | chr5 | 5440007   | 5440026   |
| SMG | NM_015325    | KIAA0947 | chr5 | 5441224   | 5441336   |
| SMG | NM_015325    | KIAA0947 | chr5 | 5443280   | 5443357   |
| SMG | NM_015325    | KIAA0947 | chr5 | 5444401   | 5444439   |
| SMG | NM_015325    | KIAA0947 | chr5 | 5447539   | 5447622   |
| SMG | NM_015325    | KIAA0947 | chr5 | 5447833   | 5447873   |
| SMG | NM_015325    | KIAA0947 | chr5 | 5447953   | 5448010   |
| SMG | NM_015325    | KIAA0947 | chr5 | 5454664   | 5454751   |
| SMG | NM_015325    | KIAA0947 | chr5 | 5457444   | 5457854   |
| SMG | NM_015325    | KIAA0947 | chr5 | 5460548   | 5465339   |
| SMG | NM_015325    | KIAA0947 | chr5 | 5466446   | 5466615   |
| SMG | NM_015325    | KIAA0947 | chr5 | 5468940   | 5469101   |
| SMG | NM_015325    | KIAA0947 | chr5 | 5473670   | 5473861   |
| SMG | NM_015325    | KIAA0947 | chr5 | 5476085   | 5476192   |
| SMG | NM_015325    | KIAA0947 | chr5 | 5486833   | 5486932   |
| SMG | NM_015325    | KIAA0947 | chr5 | 5489261   | 5490347   |
| SMG | NM_001286274 | KIAA1586 | chr6 | 56911329  | 56911574  |
| SMG | NM_001286274 | KIAA1586 | chr6 | 56912110  | 56912194  |
| SMG | NM_001286274 | KIAA1586 | chr6 | 56917483  | 56920037  |
| SMG | NM_032435    | KIAA1804 | chr1 | 233463513 | 233464579 |
| SMG | NM_032435    | KIAA1804 | chr1 | 233482187 | 233482368 |
| SMG | NM_032435    | KIAA1804 | chr1 | 233489552 | 233489701 |
| SMG | NM_032435    | KIAA1804 | chr1 | 233490581 | 233490757 |
| SMG | NM_032435    | KIAA1804 | chr1 | 233497798 | 233498039 |
| SMG | NM_032435    | KIAA1804 | chr1 | 233507783 | 233507906 |
| SMG | NM_032435    | KIAA1804 | chr1 | 233511661 | 233511812 |
| SMG | NM_032435    | KIAA1804 | chr1 | 233512175 | 233512273 |
| SMG | NM_032435    | KIAA1804 | chr1 | 233514676 | 233515456 |
| SMG | NM_032435    | KIAA1804 | chr1 | 233518050 | 233520894 |
| DRV | NM_000222    | KIT      | chr4 | 55524094  | 55524248  |
| DRV | NM_000222    | KIT      | chr4 | 55561677  | 55561947  |
| DRV | NM_000222    | KIT      | chr4 | 55564449  | 55564731  |
| DRV | NM_000222    | KIT      | chr4 | 55565795  | 55565932  |
| DRV | NM_000222    | KIT      | chr4 | 55569889  | 55570058  |
| DRV | NM_000222    | KIT      | chr4 | 55573263  | 55573453  |

|     |              |        |       |          |          |
|-----|--------------|--------|-------|----------|----------|
| DRV | NM_000222    | KIT    | chr4  | 55575589 | 55575705 |
| DRV | NM_000222    | KIT    | chr4  | 55589749 | 55589864 |
| DRV | NM_000222    | KIT    | chr4  | 55592022 | 55592216 |
| DRV | NM_000222    | KIT    | chr4  | 55593383 | 55593490 |
| DRV | NM_000222    | KIT    | chr4  | 55593581 | 55593708 |
| DRV | NM_000222    | KIT    | chr4  | 55593988 | 55594093 |
| DRV | NM_000222    | KIT    | chr4  | 55594176 | 55594287 |
| DRV | NM_000222    | KIT    | chr4  | 55595500 | 55595651 |
| DRV | NM_000222    | KIT    | chr4  | 55597493 | 55597585 |
| DRV | NM_000222    | KIT    | chr4  | 55598036 | 55598164 |
| DRV | NM_000222    | KIT    | chr4  | 55599235 | 55599358 |
| DRV | NM_000222    | KIT    | chr4  | 55602663 | 55602775 |
| DRV | NM_000222    | KIT    | chr4  | 55602886 | 55602986 |
| DRV | NM_000222    | KIT    | chr4  | 55603340 | 55603446 |
| DRV | NM_000222    | KIT    | chr4  | 55604594 | 55606881 |
| CNV | NM_001286818 | KLF5   | chr13 | 73629113 | 73629296 |
| CNV | NM_001286818 | KLF5   | chr13 | 73635998 | 73636872 |
| CNV | NM_001286818 | KLF5   | chr13 | 73637961 | 73638021 |
| CNV | NM_001286818 | KLF5   | chr13 | 73649845 | 73651680 |
| CNV | NM_020866    | KLHL1  | chr13 | 70274724 | 70275893 |
| CNV | NM_020866    | KLHL1  | chr13 | 70281756 | 70281928 |
| CNV | NM_020866    | KLHL1  | chr13 | 70293500 | 70293713 |
| CNV | NM_020866    | KLHL1  | chr13 | 70314525 | 70314688 |
| CNV | NM_020866    | KLHL1  | chr13 | 70370869 | 70371094 |
| CNV | NM_020866    | KLHL1  | chr13 | 70413107 | 70413294 |
| CNV | NM_020866    | KLHL1  | chr13 | 70456414 | 70456627 |
| CNV | NM_020866    | KLHL1  | chr13 | 70514171 | 70514368 |
| CNV | NM_020866    | KLHL1  | chr13 | 70535439 | 70535576 |
| CNV | NM_020866    | KLHL1  | chr13 | 70549751 | 70549934 |
| CNV | NM_020866    | KLHL1  | chr13 | 70681334 | 70682625 |
| SMG | NM_025010    | KLHL18 | chr3  | 47324329 | 47324584 |
| SMG | NM_025010    | KLHL18 | chr3  | 47361142 | 47361273 |
| SMG | NM_025010    | KLHL18 | chr3  | 47364057 | 47364198 |
| SMG | NM_025010    | KLHL18 | chr3  | 47371440 | 47371639 |
| SMG | NM_025010    | KLHL18 | chr3  | 47374646 | 47374807 |
| SMG | NM_025010    | KLHL18 | chr3  | 47376172 | 47376309 |
| SMG | NM_025010    | KLHL18 | chr3  | 47378024 | 47378247 |
| SMG | NM_025010    | KLHL18 | chr3  | 47382061 | 47382166 |
| SMG | NM_025010    | KLHL18 | chr3  | 47384208 | 47384320 |
| SMG | NM_025010    | KLHL18 | chr3  | 47385044 | 47388306 |
| SMG | NM_001007075 | KLHL5  | chr4  | 39046450 | 39046716 |
| SMG | NM_001007075 | KLHL5  | chr4  | 39064178 | 39064655 |
| SMG | NM_001007075 | KLHL5  | chr4  | 39077584 | 39077767 |

|     |              |       |       |           |           |
|-----|--------------|-------|-------|-----------|-----------|
| SMG | NM_001007075 | KLHL5 | chr4  | 39082722  | 39082859  |
| SMG | NM_001007075 | KLHL5 | chr4  | 39083582  | 39083779  |
| SMG | NM_001007075 | KLHL5 | chr4  | 39088134  | 39088347  |
| SMG | NM_001007075 | KLHL5 | chr4  | 39098311  | 39098498  |
| SMG | NM_001007075 | KLHL5 | chr4  | 39104906  | 39105131  |
| SMG | NM_001007075 | KLHL5 | chr4  | 39109188  | 39109351  |
| SMG | NM_001007075 | KLHL5 | chr4  | 39114639  | 39114852  |
| SMG | NM_001007075 | KLHL5 | chr4  | 39116778  | 39116950  |
| SMG | NM_001007075 | KLHL5 | chr4  | 39122629  | 39127853  |
| SMG | NM_001002231 | KLK2  | chr19 | 51376688  | 51376775  |
| SMG | NM_001002231 | KLK2  | chr19 | 51377976  | 51378136  |
| SMG | NM_001002231 | KLK2  | chr19 | 51379727  | 51380014  |
| SMG | NM_001002231 | KLK2  | chr19 | 51380127  | 51380301  |
| SMG | NM_001002231 | KLK2  | chr19 | 51381659  | 51383823  |
| SMG | NM_002258    | KLRB1 | chr12 | 9747869   | 9748017   |
| SMG | NM_002258    | KLRB1 | chr12 | 9750641   | 9750757   |
| SMG | NM_002258    | KLRB1 | chr12 | 9751094   | 9751249   |
| SMG | NM_002258    | KLRB1 | chr12 | 9752362   | 9752437   |
| SMG | NM_002258    | KLRB1 | chr12 | 9754096   | 9754195   |
| SMG | NM_002258    | KLRB1 | chr12 | 9760350   | 9760497   |
| DRV | NM_170606    | KMT2C | chr7  | 151832009 | 151834009 |
| DRV | NM_170606    | KMT2C | chr7  | 151835880 | 151835989 |
| DRV | NM_170606    | KMT2C | chr7  | 151836270 | 151836344 |
| DRV | NM_170606    | KMT2C | chr7  | 151836759 | 151836876 |
| DRV | NM_170606    | KMT2C | chr7  | 151841797 | 151841966 |
| DRV | NM_170606    | KMT2C | chr7  | 151842237 | 151842380 |
| DRV | NM_170606    | KMT2C | chr7  | 151843683 | 151843820 |
| DRV | NM_170606    | KMT2C | chr7  | 151845117 | 151846237 |
| DRV | NM_170606    | KMT2C | chr7  | 151847984 | 151848092 |
| DRV | NM_170606    | KMT2C | chr7  | 151848526 | 151848666 |
| DRV | NM_170606    | KMT2C | chr7  | 151849789 | 151850039 |
| DRV | NM_170606    | KMT2C | chr7  | 151851094 | 151851231 |
| DRV | NM_170606    | KMT2C | chr7  | 151851351 | 151851530 |
| DRV | NM_170606    | KMT2C | chr7  | 151852994 | 151853142 |
| DRV | NM_170606    | KMT2C | chr7  | 151853289 | 151853431 |
| DRV | NM_170606    | KMT2C | chr7  | 151855947 | 151856157 |
| DRV | NM_170606    | KMT2C | chr7  | 151859201 | 151860911 |
| DRV | NM_170606    | KMT2C | chr7  | 151864230 | 151864463 |
| DRV | NM_170606    | KMT2C | chr7  | 151866270 | 151866334 |
| DRV | NM_170606    | KMT2C | chr7  | 151868348 | 151868427 |
| DRV | NM_170606    | KMT2C | chr7  | 151871215 | 151871327 |
| DRV | NM_170606    | KMT2C | chr7  | 151873275 | 151875095 |
| DRV | NM_170606    | KMT2C | chr7  | 151876918 | 151877211 |

|     |           |       |       |           |           |
|-----|-----------|-------|-------|-----------|-----------|
| DRV | NM_170606 | KMT2C | chr7  | 151877795 | 151879679 |
| DRV | NM_170606 | KMT2C | chr7  | 151880058 | 151880241 |
| DRV | NM_170606 | KMT2C | chr7  | 151882642 | 151882716 |
| DRV | NM_170606 | KMT2C | chr7  | 151884346 | 151884561 |
| DRV | NM_170606 | KMT2C | chr7  | 151884799 | 151884932 |
| DRV | NM_170606 | KMT2C | chr7  | 151891093 | 151891213 |
| DRV | NM_170606 | KMT2C | chr7  | 151891313 | 151891346 |
| DRV | NM_170606 | KMT2C | chr7  | 151891524 | 151891653 |
| DRV | NM_170606 | KMT2C | chr7  | 151892991 | 151893096 |
| DRV | NM_170606 | KMT2C | chr7  | 151896363 | 151896544 |
| DRV | NM_170606 | KMT2C | chr7  | 151900018 | 151900149 |
| DRV | NM_170606 | KMT2C | chr7  | 151902190 | 151902310 |
| DRV | NM_170606 | KMT2C | chr7  | 151904384 | 151904513 |
| DRV | NM_170606 | KMT2C | chr7  | 151917607 | 151917820 |
| DRV | NM_170606 | KMT2C | chr7  | 151919085 | 151919151 |
| DRV | NM_170606 | KMT2C | chr7  | 151919657 | 151919767 |
| DRV | NM_170606 | KMT2C | chr7  | 151921099 | 151921264 |
| DRV | NM_170606 | KMT2C | chr7  | 151921519 | 151921701 |
| DRV | NM_170606 | KMT2C | chr7  | 151927007 | 151927112 |
| DRV | NM_170606 | KMT2C | chr7  | 151927304 | 151927406 |
| DRV | NM_170606 | KMT2C | chr7  | 151932901 | 151933018 |
| DRV | NM_170606 | KMT2C | chr7  | 151935791 | 151935911 |
| DRV | NM_170606 | KMT2C | chr7  | 151944986 | 151945705 |
| DRV | NM_170606 | KMT2C | chr7  | 151946960 | 151947038 |
| DRV | NM_170606 | KMT2C | chr7  | 151947937 | 151948051 |
| DRV | NM_170606 | KMT2C | chr7  | 151949023 | 151949175 |
| DRV | NM_170606 | KMT2C | chr7  | 151949630 | 151949800 |
| DRV | NM_170606 | KMT2C | chr7  | 151960100 | 151960215 |
| DRV | NM_170606 | KMT2C | chr7  | 151962122 | 151962294 |
| DRV | NM_170606 | KMT2C | chr7  | 151970789 | 151970952 |
| DRV | NM_170606 | KMT2C | chr7  | 152007050 | 152007160 |
| DRV | NM_170606 | KMT2C | chr7  | 152008882 | 152009031 |
| DRV | NM_170606 | KMT2C | chr7  | 152012222 | 152012423 |
| DRV | NM_170606 | KMT2C | chr7  | 152027685 | 152027824 |
| DRV | NM_170606 | KMT2C | chr7  | 152055671 | 152055760 |
| DRV | NM_170606 | KMT2C | chr7  | 152132710 | 152133090 |
| CNV | NM_002267 | KPNA3 | chr13 | 50273442  | 50276034  |
| CNV | NM_002267 | KPNA3 | chr13 | 50276521  | 50276616  |
| CNV | NM_002267 | KPNA3 | chr13 | 50279756  | 50279919  |
| CNV | NM_002267 | KPNA3 | chr13 | 50280233  | 50280305  |
| CNV | NM_002267 | KPNA3 | chr13 | 50280403  | 50280508  |
| CNV | NM_002267 | KPNA3 | chr13 | 50283707  | 50283836  |
| CNV | NM_002267 | KPNA3 | chr13 | 50285026  | 50285158  |



|     |              |          |       |           |           |
|-----|--------------|----------|-------|-----------|-----------|
| CNV | NM_002267    | KPNA3    | chr13 | 50293910  | 50293955  |
| CNV | NM_002267    | KPNA3    | chr13 | 50296090  | 50296260  |
| CNV | NM_002267    | KPNA3    | chr13 | 50296612  | 50296699  |
| CNV | NM_002267    | KPNA3    | chr13 | 50299551  | 50299637  |
| CNV | NM_002267    | KPNA3    | chr13 | 50306506  | 50306602  |
| CNV | NM_002267    | KPNA3    | chr13 | 50306740  | 50306793  |
| CNV | NM_002267    | KPNA3    | chr13 | 50306882  | 50306912  |
| CNV | NM_002267    | KPNA3    | chr13 | 50307092  | 50307182  |
| CNV | NM_002267    | KPNA3    | chr13 | 50321084  | 50321129  |
| CNV | NM_002267    | KPNA3    | chr13 | 50366573  | 50367057  |
| DRV | NM_004985    | KRAS     | chr12 | 25358179  | 25362845  |
| DRV | NM_004985    | KRAS     | chr12 | 25378547  | 25378707  |
| DRV | NM_004985    | KRAS     | chr12 | 25380167  | 25380346  |
| DRV | NM_004985    | KRAS     | chr12 | 25398207  | 25398329  |
| DRV | NM_004985    | KRAS     | chr12 | 25403684  | 25403854  |
| LIT | NM_175068    | KRT73    | chr12 | 53001353  | 53002236  |
| LIT | NM_175068    | KRT73    | chr12 | 53003030  | 53003065  |
| LIT | NM_175068    | KRT73    | chr12 | 53004398  | 53004619  |
| LIT | NM_175068    | KRT73    | chr12 | 53004987  | 53005113  |
| LIT | NM_175068    | KRT73    | chr12 | 53007471  | 53007636  |
| LIT | NM_175068    | KRT73    | chr12 | 53008362  | 53008458  |
| LIT | NM_175068    | KRT73    | chr12 | 53009062  | 53009123  |
| LIT | NM_175068    | KRT73    | chr12 | 53009949  | 53010164  |
| LIT | NM_175068    | KRT73    | chr12 | 53011861  | 53012343  |
| SMG | NM_001001480 | KRTAP5-5 | chr11 | 1651032   | 1652159   |
| CNV | NM_001199241 | KYNU     | chr2  | 143635194 | 143635305 |
| CNV | NM_001199241 | KYNU     | chr2  | 143638913 | 143638999 |
| CNV | NM_001199241 | KYNU     | chr2  | 143642917 | 143643105 |
| CNV | NM_001199241 | KYNU     | chr2  | 143676177 | 143676298 |
| CNV | NM_001199241 | KYNU     | chr2  | 143685227 | 143685310 |
| CNV | NM_001199241 | KYNU     | chr2  | 143712378 | 143712440 |
| CNV | NM_001199241 | KYNU     | chr2  | 143713771 | 143713843 |
| CNV | NM_001199241 | KYNU     | chr2  | 143715209 | 143715284 |
| CNV | NM_001199241 | KYNU     | chr2  | 143718192 | 143718339 |
| CNV | NM_001199241 | KYNU     | chr2  | 143742652 | 143742751 |
| CNV | NM_001199241 | KYNU     | chr2  | 143743516 | 143743590 |
| CNV | NM_001199241 | KYNU     | chr2  | 143787195 | 143787248 |
| CNV | NM_001199241 | KYNU     | chr2  | 143790804 | 143790890 |
| CNV | NM_001199241 | KYNU     | chr2  | 143797996 | 143798227 |
| CNV | NM_001199241 | KYNU     | chr2  | 143799615 | 143799885 |
| SMG | NM_024884    | L2HGDH   | chr14 | 50709151  | 50713971  |
| SMG | NM_024884    | L2HGDH   | chr14 | 50732075  | 50732207  |
| SMG | NM_024884    | L2HGDH   | chr14 | 50734470  | 50734628  |

|     |              |         |       |           |           |
|-----|--------------|---------|-------|-----------|-----------|
| SMG | NM_024884    | L2HGDH  | chr14 | 50735880  | 50736048  |
| SMG | NM_024884    | L2HGDH  | chr14 | 50745237  | 50745272  |
| SMG | NM_024884    | L2HGDH  | chr14 | 50750588  | 50750751  |
| SMG | NM_024884    | L2HGDH  | chr14 | 50760832  | 50760964  |
| SMG | NM_024884    | L2HGDH  | chr14 | 50768734  | 50768886  |
| SMG | NM_024884    | L2HGDH  | chr14 | 50769619  | 50769735  |
| SMG | NM_024884    | L2HGDH  | chr14 | 50778728  | 50778947  |
| SMG | NM_145315    | LACE1   | chr6  | 108616097 | 108616422 |
| SMG | NM_145315    | LACE1   | chr6  | 108645028 | 108645252 |
| SMG | NM_145315    | LACE1   | chr6  | 108668191 | 108668243 |
| SMG | NM_145315    | LACE1   | chr6  | 108676857 | 108676959 |
| SMG | NM_145315    | LACE1   | chr6  | 108677893 | 108678024 |
| SMG | NM_145315    | LACE1   | chr6  | 108687436 | 108687536 |
| SMG | NM_145315    | LACE1   | chr6  | 108723199 | 108723258 |
| SMG | NM_145315    | LACE1   | chr6  | 108768416 | 108768499 |
| SMG | NM_145315    | LACE1   | chr6  | 108798067 | 108798138 |
| SMG | NM_145315    | LACE1   | chr6  | 108798394 | 108798495 |
| SMG | NM_145315    | LACE1   | chr6  | 108831414 | 108831555 |
| SMG | NM_145315    | LACE1   | chr6  | 108840899 | 108841013 |
| SMG | NM_145315    | LACE1   | chr6  | 108843499 | 108844251 |
| SMG | NM_006562    | LBX1    | chr10 | 102986732 | 102987547 |
| SMG | NM_006562    | LBX1    | chr10 | 102988247 | 102988717 |
| SMG | NM_001113407 | LDB1    | chr10 | 103867324 | 103868080 |
| SMG | NM_001113407 | LDB1    | chr10 | 103868785 | 103868934 |
| SMG | NM_001113407 | LDB1    | chr10 | 103869140 | 103869264 |
| SMG | NM_001113407 | LDB1    | chr10 | 103869356 | 103869440 |
| SMG | NM_001113407 | LDB1    | chr10 | 103869677 | 103869800 |
| SMG | NM_001113407 | LDB1    | chr10 | 103870285 | 103870458 |
| SMG | NM_001113407 | LDB1    | chr10 | 103870625 | 103870728 |
| SMG | NM_001113407 | LDB1    | chr10 | 103870825 | 103870901 |
| SMG | NM_001113407 | LDB1    | chr10 | 103871012 | 103871057 |
| SMG | NM_001113407 | LDB1    | chr10 | 103871190 | 103871293 |
| SMG | NM_001113407 | LDB1    | chr10 | 103879842 | 103880210 |
| SMG | NM_001134418 | LEPREL1 | chr3  | 189674516 | 189675793 |
| SMG | NM_001134418 | LEPREL1 | chr3  | 189681746 | 189681887 |
| SMG | NM_001134418 | LEPREL1 | chr3  | 189688604 | 189688680 |
| SMG | NM_001134418 | LEPREL1 | chr3  | 189689678 | 189689796 |
| SMG | NM_001134418 | LEPREL1 | chr3  | 189690662 | 189690813 |
| SMG | NM_001134418 | LEPREL1 | chr3  | 189691697 | 189691793 |
| SMG | NM_001134418 | LEPREL1 | chr3  | 189692346 | 189692474 |
| SMG | NM_001134418 | LEPREL1 | chr3  | 189700834 | 189700929 |
| SMG | NM_001134418 | LEPREL1 | chr3  | 189702338 | 189702379 |
| SMG | NM_001134418 | LEPREL1 | chr3  | 189704576 | 189704666 |

|     |              |           |       |           |           |
|-----|--------------|-----------|-------|-----------|-----------|
| SMG | NM_001134418 | LEPREL1   | chr3  | 189705315 | 189705458 |
| SMG | NM_001134418 | LEPREL1   | chr3  | 189706695 | 189706827 |
| SMG | NM_001134418 | LEPREL1   | chr3  | 189711882 | 189712072 |
| SMG | NM_001134418 | LEPREL1   | chr3  | 189713078 | 189713231 |
| SMG | NM_001134418 | LEPREL1   | chr3  | 189839991 | 189840226 |
| SMG | NM_018176    | LGI2      | chr4  | 25000470  | 25005890  |
| SMG | NM_018176    | LGI2      | chr4  | 25013956  | 25014121  |
| SMG | NM_018176    | LGI2      | chr4  | 25019610  | 25019780  |
| SMG | NM_018176    | LGI2      | chr4  | 25020788  | 25020860  |
| SMG | NM_018176    | LGI2      | chr4  | 25026441  | 25026513  |
| SMG | NM_018176    | LGI2      | chr4  | 25028489  | 25028561  |
| SMG | NM_018176    | LGI2      | chr4  | 25030128  | 25030200  |
| SMG | NM_018176    | LGI2      | chr4  | 25032118  | 25032414  |
| LIT | NM_001017403 | LGR6      | chr1  | 202163117 | 202163329 |
| LIT | NM_001017403 | LGR6      | chr1  | 202194550 | 202194622 |
| LIT | NM_001017403 | LGR6      | chr1  | 202197063 | 202197135 |
| LIT | NM_001017403 | LGR6      | chr1  | 202205049 | 202205121 |
| LIT | NM_001017403 | LGR6      | chr1  | 202245433 | 202245649 |
| LIT | NM_001017403 | LGR6      | chr1  | 202249908 | 202249980 |
| LIT | NM_001017403 | LGR6      | chr1  | 202266635 | 202266704 |
| LIT | NM_001017403 | LGR6      | chr1  | 202269976 | 202270048 |
| LIT | NM_001017403 | LGR6      | chr1  | 202270291 | 202270363 |
| LIT | NM_001017403 | LGR6      | chr1  | 202272406 | 202272475 |
| LIT | NM_001017403 | LGR6      | chr1  | 202273686 | 202273758 |
| LIT | NM_001017403 | LGR6      | chr1  | 202274811 | 202274877 |
| LIT | NM_001017403 | LGR6      | chr1  | 202275995 | 202276067 |
| LIT | NM_001017403 | LGR6      | chr1  | 202276457 | 202276529 |
| LIT | NM_001017403 | LGR6      | chr1  | 202278178 | 202278304 |
| LIT | NM_001017403 | LGR6      | chr1  | 202279324 | 202279485 |
| LIT | NM_001017403 | LGR6      | chr1  | 202283929 | 202284010 |
| LIT | NM_001017403 | LGR6      | chr1  | 202287079 | 202288889 |
| CNV | NM_005780    | LHFP      | chr13 | 39917028  | 39918191  |
| CNV | NM_005780    | LHFP      | chr13 | 39952564  | 39952663  |
| CNV | NM_005780    | LHFP      | chr13 | 40174968  | 40175527  |
| CNV | NM_005780    | LHFP      | chr13 | 40177019  | 40177356  |
| SMG | NM_005779    | LHFPL2    | chr5  | 77781037  | 77784976  |
| SMG | NM_005779    | LHFPL2    | chr5  | 77805606  | 77806221  |
| SMG | NM_005779    | LHFPL2    | chr5  | 77860635  | 77860694  |
| SMG | NM_005779    | LHFPL2    | chr5  | 77928086  | 77928191  |
| SMG | NM_005779    | LHFPL2    | chr5  | 77944321  | 77944648  |
| CNV | NR_027301    | LINC00662 | chr19 | 28281400  | 28282809  |
| CNV | NR_027301    | LINC00662 | chr19 | 28283907  | 28284140  |
| CNV | NR_027301    | LINC00662 | chr19 | 28284439  | 28284848  |

|     |           |           |       |          |          |
|-----|-----------|-----------|-------|----------|----------|
| CNV | NR_024391 | LINC00669 | chr18 | 36786887 | 36788753 |
| CNV | NR_024391 | LINC00669 | chr18 | 37115421 | 37115579 |
| CNV | NR_024391 | LINC00669 | chr18 | 37331292 | 37331324 |
| CNV | NR_024391 | LINC00669 | chr18 | 37331868 | 37331959 |
| CNV | NR_038985 | LINC00856 | chr10 | 80008381 | 80008827 |
| CNV | NR_038985 | LINC00856 | chr10 | 80010033 | 80012402 |
| CNV | NR_046222 | LINC00904 | chr19 | 35382932 | 35383200 |
| CNV | NR_046222 | LINC00904 | chr19 | 35384247 | 35384360 |
| CNV | NR_046222 | LINC00904 | chr19 | 35389757 | 35389847 |
| LIT | NM_005358 | LMO7      | chr13 | 76194569 | 76196004 |
| LIT | NM_005358 | LMO7      | chr13 | 76197406 | 76197456 |
| LIT | NM_005358 | LMO7      | chr13 | 76287317 | 76287388 |
| LIT | NM_005358 | LMO7      | chr13 | 76301164 | 76301234 |
| LIT | NM_005358 | LMO7      | chr13 | 76335067 | 76335174 |
| LIT | NM_005358 | LMO7      | chr13 | 76369536 | 76369567 |
| LIT | NM_005358 | LMO7      | chr13 | 76370771 | 76370885 |
| LIT | NM_005358 | LMO7      | chr13 | 76374819 | 76375018 |
| LIT | NM_005358 | LMO7      | chr13 | 76378424 | 76378677 |
| LIT | NM_005358 | LMO7      | chr13 | 76383289 | 76383319 |
| LIT | NM_005358 | LMO7      | chr13 | 76391296 | 76391414 |
| LIT | NM_005358 | LMO7      | chr13 | 76393528 | 76393671 |
| LIT | NM_005358 | LMO7      | chr13 | 76395312 | 76395745 |
| LIT | NM_005358 | LMO7      | chr13 | 76397700 | 76398009 |
| LIT | NM_005358 | LMO7      | chr13 | 76407186 | 76407301 |
| LIT | NM_005358 | LMO7      | chr13 | 76408361 | 76408523 |
| LIT | NM_005358 | LMO7      | chr13 | 76409368 | 76409475 |
| LIT | NM_005358 | LMO7      | chr13 | 76410532 | 76410593 |
| LIT | NM_005358 | LMO7      | chr13 | 76412275 | 76412332 |
| LIT | NM_005358 | LMO7      | chr13 | 76414220 | 76414246 |
| LIT | NM_005358 | LMO7      | chr13 | 76414526 | 76414631 |
| LIT | NM_005358 | LMO7      | chr13 | 76415244 | 76415337 |
| LIT | NM_005358 | LMO7      | chr13 | 76415763 | 76416119 |
| LIT | NM_005358 | LMO7      | chr13 | 76416986 | 76417052 |
| LIT | NM_005358 | LMO7      | chr13 | 76419462 | 76419515 |
| LIT | NM_005358 | LMO7      | chr13 | 76423214 | 76423428 |
| LIT | NM_005358 | LMO7      | chr13 | 76427227 | 76427524 |
| LIT | NM_005358 | LMO7      | chr13 | 76429395 | 76429504 |
| LIT | NM_005358 | LMO7      | chr13 | 76430641 | 76430744 |
| LIT | NM_005358 | LMO7      | chr13 | 76432056 | 76434006 |
| CNV | NM_005575 | LNPEP     | chr5  | 96271345 | 96271878 |
| CNV | NM_005575 | LNPEP     | chr5  | 96314841 | 96315682 |
| CNV | NM_005575 | LNPEP     | chr5  | 96320783 | 96320922 |
| CNV | NM_005575 | LNPEP     | chr5  | 96322242 | 96322374 |

|     |              |       |       |          |          |
|-----|--------------|-------|-------|----------|----------|
| CNV | NM_005575    | LNPEP | chr5  | 96328718 | 96328839 |
| CNV | NM_005575    | LNPEP | chr5  | 96329520 | 96329675 |
| CNV | NM_005575    | LNPEP | chr5  | 96332093 | 96332207 |
| CNV | NM_005575    | LNPEP | chr5  | 96333717 | 96333849 |
| CNV | NM_005575    | LNPEP | chr5  | 96339118 | 96339250 |
| CNV | NM_005575    | LNPEP | chr5  | 96341776 | 96341937 |
| CNV | NM_005575    | LNPEP | chr5  | 96342130 | 96342219 |
| CNV | NM_005575    | LNPEP | chr5  | 96349351 | 96349535 |
| CNV | NM_005575    | LNPEP | chr5  | 96350642 | 96350799 |
| CNV | NM_005575    | LNPEP | chr5  | 96358003 | 96358188 |
| CNV | NM_005575    | LNPEP | chr5  | 96360224 | 96360386 |
| CNV | NM_005575    | LNPEP | chr5  | 96362320 | 96362461 |
| CNV | NM_005575    | LNPEP | chr5  | 96363436 | 96363518 |
| CNV | NM_005575    | LNPEP | chr5  | 96364105 | 96365115 |
| SMG | NM_002318    | LOXL2 | chr8  | 23154409 | 23155635 |
| SMG | NM_002318    | LOXL2 | chr8  | 23156348 | 23156460 |
| SMG | NM_002318    | LOXL2 | chr8  | 23159539 | 23159676 |
| SMG | NM_002318    | LOXL2 | chr8  | 23160794 | 23160910 |
| SMG | NM_002318    | LOXL2 | chr8  | 23167180 | 23167424 |
| SMG | NM_002318    | LOXL2 | chr8  | 23174461 | 23174627 |
| SMG | NM_002318    | LOXL2 | chr8  | 23177397 | 23177565 |
| SMG | NM_002318    | LOXL2 | chr8  | 23179642 | 23179794 |
| SMG | NM_002318    | LOXL2 | chr8  | 23185894 | 23186078 |
| SMG | NM_002318    | LOXL2 | chr8  | 23190913 | 23191136 |
| SMG | NM_002318    | LOXL2 | chr8  | 23198504 | 23198716 |
| SMG | NM_002318    | LOXL2 | chr8  | 23217602 | 23217778 |
| SMG | NM_002318    | LOXL2 | chr8  | 23225509 | 23225947 |
| SMG | NM_002318    | LOXL2 | chr8  | 23261466 | 23261722 |
| SMG | NM_001166252 | LPPR4 | chr1  | 99729847 | 99730227 |
| SMG | NM_001166252 | LPPR4 | chr1  | 99753520 | 99753706 |
| SMG | NM_001166252 | LPPR4 | chr1  | 99762293 | 99762423 |
| SMG | NM_001166252 | LPPR4 | chr1  | 99764590 | 99764786 |
| SMG | NM_001166252 | LPPR4 | chr1  | 99766464 | 99766522 |
| SMG | NM_001166252 | LPPR4 | chr1  | 99771240 | 99775138 |
| CNV | NM_001164213 | LRCH1 | chr13 | 47127295 | 47127838 |
| CNV | NM_001164213 | LRCH1 | chr13 | 47224335 | 47224480 |
| CNV | NM_001164213 | LRCH1 | chr13 | 47243164 | 47243291 |
| CNV | NM_001164213 | LRCH1 | chr13 | 47255875 | 47255981 |
| CNV | NM_001164213 | LRCH1 | chr13 | 47260039 | 47260176 |
| CNV | NM_001164213 | LRCH1 | chr13 | 47261986 | 47262114 |
| CNV | NM_001164213 | LRCH1 | chr13 | 47263267 | 47263331 |
| CNV | NM_001164213 | LRCH1 | chr13 | 47266670 | 47266776 |
| CNV | NM_001164213 | LRCH1 | chr13 | 47269027 | 47269152 |

|     |              |       |       |           |           |
|-----|--------------|-------|-------|-----------|-----------|
| CNV | NM_001164213 | LRCH1 | chr13 | 47273470  | 47273538  |
| CNV | NM_001164213 | LRCH1 | chr13 | 47275255  | 47275342  |
| CNV | NM_001164213 | LRCH1 | chr13 | 47279202  | 47279292  |
| CNV | NM_001164213 | LRCH1 | chr13 | 47279402  | 47279439  |
| CNV | NM_001164213 | LRCH1 | chr13 | 47285925  | 47285979  |
| CNV | NM_001164213 | LRCH1 | chr13 | 47286659  | 47286732  |
| CNV | NM_001164213 | LRCH1 | chr13 | 47297355  | 47297465  |
| CNV | NM_001164213 | LRCH1 | chr13 | 47302981  | 47303119  |
| CNV | NM_001164213 | LRCH1 | chr13 | 47308055  | 47308133  |
| CNV | NM_001164213 | LRCH1 | chr13 | 47324674  | 47327175  |
| CNV | NM_018557    | LRP1B | chr2  | 140988995 | 140990895 |
| CNV | NM_018557    | LRP1B | chr2  | 140992354 | 140992453 |
| CNV | NM_018557    | LRP1B | chr2  | 140995720 | 140995865 |
| CNV | NM_018557    | LRP1B | chr2  | 140997010 | 140997101 |
| CNV | NM_018557    | LRP1B | chr2  | 141004654 | 141004731 |
| CNV | NM_018557    | LRP1B | chr2  | 141027810 | 141027915 |
| CNV | NM_018557    | LRP1B | chr2  | 141031992 | 141032167 |
| CNV | NM_018557    | LRP1B | chr2  | 141055376 | 141055538 |
| CNV | NM_018557    | LRP1B | chr2  | 141072503 | 141072668 |
| CNV | NM_018557    | LRP1B | chr2  | 141079531 | 141079657 |
| CNV | NM_018557    | LRP1B | chr2  | 141081461 | 141081635 |
| CNV | NM_018557    | LRP1B | chr2  | 141083330 | 141083447 |
| CNV | NM_018557    | LRP1B | chr2  | 141092021 | 141092128 |
| CNV | NM_018557    | LRP1B | chr2  | 141093183 | 141093407 |
| CNV | NM_018557    | LRP1B | chr2  | 141108365 | 141108607 |
| CNV | NM_018557    | LRP1B | chr2  | 141110521 | 141110641 |
| CNV | NM_018557    | LRP1B | chr2  | 141113910 | 141114045 |
| CNV | NM_018557    | LRP1B | chr2  | 141115547 | 141115685 |
| CNV | NM_018557    | LRP1B | chr2  | 141116389 | 141116515 |
| CNV | NM_018557    | LRP1B | chr2  | 141122229 | 141122352 |
| CNV | NM_018557    | LRP1B | chr2  | 141128278 | 141128411 |
| CNV | NM_018557    | LRP1B | chr2  | 141128747 | 141128854 |
| CNV | NM_018557    | LRP1B | chr2  | 141130576 | 141130706 |
| CNV | NM_018557    | LRP1B | chr2  | 141135748 | 141135855 |
| CNV | NM_018557    | LRP1B | chr2  | 141143461 | 141143578 |
| CNV | NM_018557    | LRP1B | chr2  | 141200072 | 141200192 |
| CNV | NM_018557    | LRP1B | chr2  | 141201898 | 141202018 |
| CNV | NM_018557    | LRP1B | chr2  | 141202131 | 141202248 |
| CNV | NM_018557    | LRP1B | chr2  | 141208136 | 141208230 |
| CNV | NM_018557    | LRP1B | chr2  | 141214023 | 141214172 |
| CNV | NM_018557    | LRP1B | chr2  | 141215031 | 141215220 |
| CNV | NM_018557    | LRP1B | chr2  | 141232706 | 141232906 |
| CNV | NM_018557    | LRP1B | chr2  | 141242911 | 141243093 |

|     |           |       |      |           |           |
|-----|-----------|-------|------|-----------|-----------|
| CNV | NM_018557 | LRP1B | chr2 | 141245185 | 141245308 |
| CNV | NM_018557 | LRP1B | chr2 | 141250176 | 141250262 |
| CNV | NM_018557 | LRP1B | chr2 | 141253133 | 141253317 |
| CNV | NM_018557 | LRP1B | chr2 | 141259255 | 141259443 |
| CNV | NM_018557 | LRP1B | chr2 | 141260531 | 141260672 |
| CNV | NM_018557 | LRP1B | chr2 | 141264364 | 141264487 |
| CNV | NM_018557 | LRP1B | chr2 | 141267496 | 141267625 |
| CNV | NM_018557 | LRP1B | chr2 | 141272221 | 141272341 |
| CNV | NM_018557 | LRP1B | chr2 | 141274457 | 141274580 |
| CNV | NM_018557 | LRP1B | chr2 | 141283412 | 141283562 |
| CNV | NM_018557 | LRP1B | chr2 | 141283805 | 141283919 |
| CNV | NM_018557 | LRP1B | chr2 | 141291589 | 141291709 |
| CNV | NM_018557 | LRP1B | chr2 | 141294149 | 141294278 |
| CNV | NM_018557 | LRP1B | chr2 | 141298541 | 141298667 |
| CNV | NM_018557 | LRP1B | chr2 | 141299347 | 141299540 |
| CNV | NM_018557 | LRP1B | chr2 | 141356199 | 141356404 |
| CNV | NM_018557 | LRP1B | chr2 | 141359018 | 141359208 |
| CNV | NM_018557 | LRP1B | chr2 | 141457818 | 141458190 |
| CNV | NM_018557 | LRP1B | chr2 | 141459289 | 141459414 |
| CNV | NM_018557 | LRP1B | chr2 | 141459709 | 141459861 |
| CNV | NM_018557 | LRP1B | chr2 | 141459995 | 141460122 |
| CNV | NM_018557 | LRP1B | chr2 | 141473541 | 141473671 |
| CNV | NM_018557 | LRP1B | chr2 | 141474250 | 141474385 |
| CNV | NM_018557 | LRP1B | chr2 | 141526781 | 141526913 |
| CNV | NM_018557 | LRP1B | chr2 | 141528449 | 141528575 |
| CNV | NM_018557 | LRP1B | chr2 | 141533666 | 141533807 |
| CNV | NM_018557 | LRP1B | chr2 | 141571225 | 141571375 |
| CNV | NM_018557 | LRP1B | chr2 | 141597559 | 141597654 |
| CNV | NM_018557 | LRP1B | chr2 | 141598486 | 141598661 |
| CNV | NM_018557 | LRP1B | chr2 | 141607670 | 141607898 |
| CNV | NM_018557 | LRP1B | chr2 | 141609220 | 141609352 |
| CNV | NM_018557 | LRP1B | chr2 | 141625158 | 141625403 |
| CNV | NM_018557 | LRP1B | chr2 | 141625667 | 141625832 |
| CNV | NM_018557 | LRP1B | chr2 | 141641385 | 141641590 |
| CNV | NM_018557 | LRP1B | chr2 | 141643706 | 141643904 |
| CNV | NM_018557 | LRP1B | chr2 | 141660488 | 141660734 |
| CNV | NM_018557 | LRP1B | chr2 | 141665445 | 141665646 |
| CNV | NM_018557 | LRP1B | chr2 | 141680533 | 141680716 |
| CNV | NM_018557 | LRP1B | chr2 | 141707803 | 141707971 |
| CNV | NM_018557 | LRP1B | chr2 | 141709428 | 141709509 |
| CNV | NM_018557 | LRP1B | chr2 | 141739728 | 141739845 |
| CNV | NM_018557 | LRP1B | chr2 | 141747100 | 141747226 |
| CNV | NM_018557 | LRP1B | chr2 | 141751563 | 141751704 |

|     |           |       |      |           |           |
|-----|-----------|-------|------|-----------|-----------|
| CNV | NM_018557 | LRP1B | chr2 | 141762903 | 141763026 |
| CNV | NM_018557 | LRP1B | chr2 | 141771124 | 141771314 |
| CNV | NM_018557 | LRP1B | chr2 | 141773264 | 141773484 |
| CNV | NM_018557 | LRP1B | chr2 | 141777490 | 141777671 |
| CNV | NM_018557 | LRP1B | chr2 | 141806554 | 141806791 |
| CNV | NM_018557 | LRP1B | chr2 | 141812684 | 141812828 |
| CNV | NM_018557 | LRP1B | chr2 | 141816451 | 141816623 |
| CNV | NM_018557 | LRP1B | chr2 | 141819619 | 141819842 |
| CNV | NM_018557 | LRP1B | chr2 | 141945989 | 141946152 |
| CNV | NM_018557 | LRP1B | chr2 | 141986751 | 141987009 |
| CNV | NM_018557 | LRP1B | chr2 | 142004794 | 142004923 |
| CNV | NM_018557 | LRP1B | chr2 | 142012090 | 142012210 |
| CNV | NM_018557 | LRP1B | chr2 | 142237964 | 142238102 |
| CNV | NM_018557 | LRP1B | chr2 | 142567847 | 142567970 |
| CNV | NM_018557 | LRP1B | chr2 | 142888216 | 142889270 |
| LIT | NM_004525 | LRP2  | chr2 | 169983618 | 169985340 |
| LIT | NM_004525 | LRP2  | chr2 | 169985522 | 169985594 |
| LIT | NM_004525 | LRP2  | chr2 | 169989083 | 169989191 |
| LIT | NM_004525 | LRP2  | chr2 | 169993901 | 169994003 |
| LIT | NM_004525 | LRP2  | chr2 | 169995086 | 169995216 |
| LIT | NM_004525 | LRP2  | chr2 | 169995760 | 169995881 |
| LIT | NM_004525 | LRP2  | chr2 | 169996052 | 169996120 |
| LIT | NM_004525 | LRP2  | chr2 | 169996964 | 169997055 |
| LIT | NM_004525 | LRP2  | chr2 | 169999183 | 169999303 |
| LIT | NM_004525 | LRP2  | chr2 | 170002256 | 170002433 |
| LIT | NM_004525 | LRP2  | chr2 | 170003248 | 170003469 |
| LIT | NM_004525 | LRP2  | chr2 | 170007407 | 170007536 |
| LIT | NM_004525 | LRP2  | chr2 | 170009308 | 170009474 |
| LIT | NM_004525 | LRP2  | chr2 | 170010969 | 170011113 |
| LIT | NM_004525 | LRP2  | chr2 | 170012783 | 170012915 |
| LIT | NM_004525 | LRP2  | chr2 | 170013880 | 170014012 |
| LIT | NM_004525 | LRP2  | chr2 | 170018981 | 170019110 |
| LIT | NM_004525 | LRP2  | chr2 | 170022441 | 170022564 |
| LIT | NM_004525 | LRP2  | chr2 | 170025048 | 170025186 |
| LIT | NM_004525 | LRP2  | chr2 | 170026211 | 170026328 |
| LIT | NM_004525 | LRP2  | chr2 | 170027060 | 170027177 |
| LIT | NM_004525 | LRP2  | chr2 | 170028524 | 170028644 |
| LIT | NM_004525 | LRP2  | chr2 | 170029605 | 170029734 |
| LIT | NM_004525 | LRP2  | chr2 | 170030428 | 170030674 |
| LIT | NM_004525 | LRP2  | chr2 | 170031702 | 170031899 |
| LIT | NM_004525 | LRP2  | chr2 | 170032920 | 170033098 |
| LIT | NM_004525 | LRP2  | chr2 | 170034312 | 170034536 |
| LIT | NM_004525 | LRP2  | chr2 | 170037957 | 170038128 |



|     |           |      |      |           |           |
|-----|-----------|------|------|-----------|-----------|
| LIT | NM_004525 | LRP2 | chr2 | 170038676 | 170038829 |
| LIT | NM_004525 | LRP2 | chr2 | 170042012 | 170042529 |
| LIT | NM_004525 | LRP2 | chr2 | 170044479 | 170044775 |
| LIT | NM_004525 | LRP2 | chr2 | 170048341 | 170048543 |
| LIT | NM_004525 | LRP2 | chr2 | 170050270 | 170050402 |
| LIT | NM_004525 | LRP2 | chr2 | 170053420 | 170053540 |
| LIT | NM_004525 | LRP2 | chr2 | 170055295 | 170055421 |
| LIT | NM_004525 | LRP2 | chr2 | 170058137 | 170058380 |
| LIT | NM_004525 | LRP2 | chr2 | 170059265 | 170059469 |
| LIT | NM_004525 | LRP2 | chr2 | 170060491 | 170060781 |
| LIT | NM_004525 | LRP2 | chr2 | 170061988 | 170062147 |
| LIT | NM_004525 | LRP2 | chr2 | 170062532 | 170062698 |
| LIT | NM_004525 | LRP2 | chr2 | 170062839 | 170063760 |
| LIT | NM_004525 | LRP2 | chr2 | 170065962 | 170066151 |
| LIT | NM_004525 | LRP2 | chr2 | 170068477 | 170068717 |
| LIT | NM_004525 | LRP2 | chr2 | 170070166 | 170070380 |
| LIT | NM_004525 | LRP2 | chr2 | 170072762 | 170072940 |
| LIT | NM_004525 | LRP2 | chr2 | 170076963 | 170077073 |
| LIT | NM_004525 | LRP2 | chr2 | 170081819 | 170081963 |
| LIT | NM_004525 | LRP2 | chr2 | 170082931 | 170083098 |
| LIT | NM_004525 | LRP2 | chr2 | 170088223 | 170088352 |
| LIT | NM_004525 | LRP2 | chr2 | 170089920 | 170090098 |
| LIT | NM_004525 | LRP2 | chr2 | 170092349 | 170092578 |
| LIT | NM_004525 | LRP2 | chr2 | 170093612 | 170093797 |
| LIT | NM_004525 | LRP2 | chr2 | 170094600 | 170094812 |
| LIT | NM_004525 | LRP2 | chr2 | 170096036 | 170096285 |
| LIT | NM_004525 | LRP2 | chr2 | 170097497 | 170097875 |
| LIT | NM_004525 | LRP2 | chr2 | 170099465 | 170099582 |
| LIT | NM_004525 | LRP2 | chr2 | 170099912 | 170100032 |
| LIT | NM_004525 | LRP2 | chr2 | 170101202 | 170101442 |
| LIT | NM_004525 | LRP2 | chr2 | 170103214 | 170103496 |
| LIT | NM_004525 | LRP2 | chr2 | 170103887 | 170104025 |
| LIT | NM_004525 | LRP2 | chr2 | 170112615 | 170112746 |
| LIT | NM_004525 | LRP2 | chr2 | 170113633 | 170113759 |
| LIT | NM_004525 | LRP2 | chr2 | 170115534 | 170115727 |
| LIT | NM_004525 | LRP2 | chr2 | 170127413 | 170127617 |
| LIT | NM_004525 | LRP2 | chr2 | 170129436 | 170129577 |
| LIT | NM_004525 | LRP2 | chr2 | 170131545 | 170131748 |
| LIT | NM_004525 | LRP2 | chr2 | 170134254 | 170134461 |
| LIT | NM_004525 | LRP2 | chr2 | 170135881 | 170136105 |
| LIT | NM_004525 | LRP2 | chr2 | 170136859 | 170137029 |
| LIT | NM_004525 | LRP2 | chr2 | 170139382 | 170139511 |
| LIT | NM_004525 | LRP2 | chr2 | 170145535 | 170145655 |

|     |              |        |       |           |           |
|-----|--------------|--------|-------|-----------|-----------|
| LIT | NM_004525    | LRP2   | chr2  | 170147354 | 170147507 |
| LIT | NM_004525    | LRP2   | chr2  | 170148762 | 170148879 |
| LIT | NM_004525    | LRP2   | chr2  | 170150657 | 170150771 |
| LIT | NM_004525    | LRP2   | chr2  | 170151109 | 170151220 |
| LIT | NM_004525    | LRP2   | chr2  | 170163790 | 170163907 |
| LIT | NM_004525    | LRP2   | chr2  | 170175271 | 170175394 |
| LIT | NM_004525    | LRP2   | chr2  | 170177286 | 170177394 |
| LIT | NM_004525    | LRP2   | chr2  | 170218830 | 170219122 |
| SMG | NM_022143    | LRRC4  | chr7  | 127667123 | 127670793 |
| SMG | NM_022143    | LRRC4  | chr7  | 127670965 | 127671002 |
| SMG | NM_001099658 | LRRN3  | chr7  | 110731061 | 110731560 |
| SMG | NM_001099658 | LRRN3  | chr7  | 110739936 | 110740018 |
| SMG | NM_001099658 | LRRN3  | chr7  | 110762470 | 110765509 |
| CNV | NM_001134745 | LRRTM4 | chr2  | 76974849  | 76976042  |
| CNV | NM_001134745 | LRRTM4 | chr2  | 77745443  | 77746990  |
| CNV | NM_001134745 | LRRTM4 | chr2  | 77748793  | 77748944  |
| CNV | NM_001134745 | LRRTM4 | chr2  | 77749234  | 77749502  |
| SMG | NM_020678    | LRTM1  | chr3  | 54952380  | 54952919  |
| SMG | NM_020678    | LRTM1  | chr3  | 54958645  | 54959242  |
| SMG | NM_020678    | LRTM1  | chr3  | 54961931  | 54962072  |
| CNV | NM_001114093 | LSM14A | chr19 | 34663351  | 34663668  |
| CNV | NM_001114093 | LSM14A | chr19 | 34685382  | 34685546  |
| CNV | NM_001114093 | LSM14A | chr19 | 34687538  | 34687668  |
| CNV | NM_001114093 | LSM14A | chr19 | 34699833  | 34699956  |
| CNV | NM_001114093 | LSM14A | chr19 | 34706028  | 34706205  |
| CNV | NM_001114093 | LSM14A | chr19 | 34706500  | 34706566  |
| CNV | NM_001114093 | LSM14A | chr19 | 34710295  | 34710478  |
| CNV | NM_001114093 | LSM14A | chr19 | 34710610  | 34710782  |
| CNV | NM_001114093 | LSM14A | chr19 | 34712411  | 34712643  |
| CNV | NM_001114093 | LSM14A | chr19 | 34717312  | 34717369  |
| CNV | NM_001114093 | LSM14A | chr19 | 34718269  | 34720420  |
| CNV | NM_001260489 | LSR    | chr19 | 35739558  | 35740034  |
| CNV | NM_001260489 | LSR    | chr19 | 35741217  | 35741562  |
| CNV | NM_001260489 | LSR    | chr19 | 35749847  | 35749967  |
| CNV | NM_001260489 | LSR    | chr19 | 35753448  | 35753595  |
| CNV | NM_001260489 | LSR    | chr19 | 35757261  | 35757435  |
| CNV | NM_001260489 | LSR    | chr19 | 35757581  | 35757641  |
| CNV | NM_001260489 | LSR    | chr19 | 35757741  | 35757870  |
| CNV | NM_001260489 | LSR    | chr19 | 35758011  | 35758637  |
| CNV | NM_001260489 | LSR    | chr19 | 35758726  | 35758867  |
| SMG | NM_001142546 | LUZP1  | chr1  | 23410515  | 23415546  |
| SMG | NM_001142546 | LUZP1  | chr1  | 23417682  | 23420873  |
| SMG | NM_001142546 | LUZP1  | chr1  | 23435514  | 23435620  |

|     |              |       |       |           |           |
|-----|--------------|-------|-------|-----------|-----------|
| SMG | NM_001142546 | LUZP1 | chr1  | 23495258  | 23495351  |
| SMG | NM_001009909 | LUZP2 | chr11 | 24518515  | 24518851  |
| SMG | NM_001009909 | LUZP2 | chr11 | 24750714  | 24750832  |
| SMG | NM_001009909 | LUZP2 | chr11 | 24753663  | 24753734  |
| SMG | NM_001009909 | LUZP2 | chr11 | 24759766  | 24759848  |
| SMG | NM_001009909 | LUZP2 | chr11 | 24784791  | 24784854  |
| SMG | NM_001009909 | LUZP2 | chr11 | 24927536  | 24927599  |
| SMG | NM_001009909 | LUZP2 | chr11 | 24936021  | 24936084  |
| SMG | NM_001009909 | LUZP2 | chr11 | 24998136  | 24998211  |
| SMG | NM_001009909 | LUZP2 | chr11 | 25004671  | 25004839  |
| SMG | NM_001009909 | LUZP2 | chr11 | 25071583  | 25071676  |
| SMG | NM_001009909 | LUZP2 | chr11 | 25098874  | 25098952  |
| SMG | NM_001009909 | LUZP2 | chr11 | 25100099  | 25104186  |
| CNV | NM_001111097 | LYN   | chr8  | 56792385  | 56792662  |
| CNV | NM_001111097 | LYN   | chr8  | 56854413  | 56854487  |
| CNV | NM_001111097 | LYN   | chr8  | 56859006  | 56859052  |
| CNV | NM_001111097 | LYN   | chr8  | 56860176  | 56860282  |
| CNV | NM_001111097 | LYN   | chr8  | 56863017  | 56863116  |
| CNV | NM_001111097 | LYN   | chr8  | 56863239  | 56863343  |
| CNV | NM_001111097 | LYN   | chr8  | 56864524  | 56864674  |
| CNV | NM_001111097 | LYN   | chr8  | 56866390  | 56866543  |
| CNV | NM_001111097 | LYN   | chr8  | 56879273  | 56879456  |
| CNV | NM_001111097 | LYN   | chr8  | 56882275  | 56882352  |
| CNV | NM_001111097 | LYN   | chr8  | 56910904  | 56911058  |
| CNV | NM_001111097 | LYN   | chr8  | 56911976  | 56912108  |
| CNV | NM_001111097 | LYN   | chr8  | 56922466  | 56925006  |
| CNV | NM_001077427 | LYPD1 | chr2  | 133402336 | 133403853 |
| CNV | NM_001077427 | LYPD1 | chr2  | 133425972 | 133426110 |
| CNV | NM_001077427 | LYPD1 | chr2  | 133428751 | 133429070 |
| CNV | NM_001195685 | LYPD6 | chr2  | 150186498 | 150186716 |
| CNV | NM_001195685 | LYPD6 | chr2  | 150294151 | 150294340 |
| CNV | NM_001195685 | LYPD6 | chr2  | 150305562 | 150305661 |
| CNV | NM_001195685 | LYPD6 | chr2  | 150325158 | 150325289 |
| CNV | NM_001195685 | LYPD6 | chr2  | 150327196 | 150330659 |
| SMG | NM_032429    | LZTS2 | chr10 | 102756863 | 102756991 |
| SMG | NM_032429    | LZTS2 | chr10 | 102762253 | 102762703 |
| SMG | NM_032429    | LZTS2 | chr10 | 102763263 | 102763923 |
| SMG | NM_032429    | LZTS2 | chr10 | 102765214 | 102765472 |
| SMG | NM_032429    | LZTS2 | chr10 | 102766241 | 102767593 |
| SMG | NM_001282533 | LZTS3 | chr20 | 3143262   | 3145798   |
| SMG | NM_001282533 | LZTS3 | chr20 | 3146142   | 3146274   |
| SMG | NM_001282533 | LZTS3 | chr20 | 3146412   | 3147006   |
| SMG | NM_001282533 | LZTS3 | chr20 | 3147350   | 3147827   |

|     |              |         |       |           |           |
|-----|--------------|---------|-------|-----------|-----------|
| SMG | NM_001282533 | LZTS3   | chr20 | 3148383   | 3148607   |
| SMG | NM_001282533 | LZTS3   | chr20 | 3154100   | 3154238   |
| SMG | NM_006439    | MAB21L2 | chr4  | 151503076 | 151505845 |
| CNV | NM_080676    | MACROD2 | chr20 | 13976145  | 13976455  |
| CNV | NM_080676    | MACROD2 | chr20 | 13982933  | 13983050  |
| CNV | NM_080676    | MACROD2 | chr20 | 14066266  | 14066374  |
| CNV | NM_080676    | MACROD2 | chr20 | 14474124  | 14474154  |
| CNV | NM_080676    | MACROD2 | chr20 | 14665488  | 14665605  |
| CNV | NM_080676    | MACROD2 | chr20 | 15210585  | 15210707  |
| CNV | NM_080676    | MACROD2 | chr20 | 15412049  | 15412080  |
| CNV | NM_080676    | MACROD2 | chr20 | 15480418  | 15480492  |
| CNV | NM_080676    | MACROD2 | chr20 | 15843389  | 15843471  |
| CNV | NM_080676    | MACROD2 | chr20 | 15866408  | 15866456  |
| CNV | NM_080676    | MACROD2 | chr20 | 15913920  | 15913983  |
| CNV | NM_080676    | MACROD2 | chr20 | 15918120  | 15918189  |
| CNV | NM_080676    | MACROD2 | chr20 | 15948197  | 15948275  |
| CNV | NM_080676    | MACROD2 | chr20 | 15967371  | 15967446  |
| CNV | NM_080676    | MACROD2 | chr20 | 15967710  | 15967803  |
| CNV | NM_080676    | MACROD2 | chr20 | 16021845  | 16021923  |
| CNV | NM_080676    | MACROD2 | chr20 | 16030474  | 16033841  |
| SMG | NM_018050    | MANSC1  | chr12 | 12482217  | 12483892  |
| SMG | NM_018050    | MANSC1  | chr12 | 12491353  | 12491494  |
| SMG | NM_018050    | MANSC1  | chr12 | 12496025  | 12496348  |
| SMG | NM_018050    | MANSC1  | chr12 | 12503011  | 12503169  |
| LIT | NM_001039538 | MAP2    | chr2  | 210288770 | 210289000 |
| LIT | NM_001039538 | MAP2    | chr2  | 210372315 | 210372365 |
| LIT | NM_001039538 | MAP2    | chr2  | 210444759 | 210444824 |
| LIT | NM_001039538 | MAP2    | chr2  | 210489776 | 210489853 |
| LIT | NM_001039538 | MAP2    | chr2  | 210517865 | 210518156 |
| LIT | NM_001039538 | MAP2    | chr2  | 210543295 | 210543409 |
| LIT | NM_001039538 | MAP2    | chr2  | 210545473 | 210545551 |
| LIT | NM_001039538 | MAP2    | chr2  | 210565000 | 210565062 |
| LIT | NM_001039538 | MAP2    | chr2  | 210569173 | 210569344 |
| LIT | NM_001039538 | MAP2    | chr2  | 210570303 | 210570451 |
| LIT | NM_001039538 | MAP2    | chr2  | 210574637 | 210574978 |
| LIT | NM_001039538 | MAP2    | chr2  | 210588318 | 210588411 |
| LIT | NM_001039538 | MAP2    | chr2  | 210590432 | 210590514 |
| LIT | NM_001039538 | MAP2    | chr2  | 210594573 | 210594686 |
| LIT | NM_001039538 | MAP2    | chr2  | 210594905 | 210598834 |
| DRV | NM_002755    | MAP2K1  | chr15 | 66679210  | 66679765  |
| DRV | NM_002755    | MAP2K1  | chr15 | 66727364  | 66727575  |
| DRV | NM_002755    | MAP2K1  | chr15 | 66729083  | 66729230  |
| DRV | NM_002755    | MAP2K1  | chr15 | 66735617  | 66735695  |

|     |              |         |       |           |           |
|-----|--------------|---------|-------|-----------|-----------|
| DRV | NM_002755    | MAP2K1  | chr15 | 66736993  | 66737045  |
| DRV | NM_002755    | MAP2K1  | chr15 | 66774092  | 66774217  |
| DRV | NM_002755    | MAP2K1  | chr15 | 66777327  | 66777529  |
| DRV | NM_002755    | MAP2K1  | chr15 | 66779565  | 66779630  |
| DRV | NM_002755    | MAP2K1  | chr15 | 66781552  | 66781614  |
| DRV | NM_002755    | MAP2K1  | chr15 | 66782055  | 66782101  |
| DRV | NM_002755    | MAP2K1  | chr15 | 66782839  | 66783882  |
| SMG | NM_001281435 | MAP2K4  | chr17 | 11924134  | 11924318  |
| SMG | NM_001281435 | MAP2K4  | chr17 | 11935582  | 11935615  |
| SMG | NM_001281435 | MAP2K4  | chr17 | 11958205  | 11958308  |
| SMG | NM_001281435 | MAP2K4  | chr17 | 11984672  | 11984847  |
| SMG | NM_001281435 | MAP2K4  | chr17 | 11998891  | 11999011  |
| SMG | NM_001281435 | MAP2K4  | chr17 | 12011106  | 12011226  |
| SMG | NM_001281435 | MAP2K4  | chr17 | 12013691  | 12013743  |
| SMG | NM_001281435 | MAP2K4  | chr17 | 12016549  | 12016677  |
| SMG | NM_001281435 | MAP2K4  | chr17 | 12028610  | 12028688  |
| SMG | NM_001281435 | MAP2K4  | chr17 | 12032455  | 12032604  |
| SMG | NM_001281435 | MAP2K4  | chr17 | 12043155  | 12043201  |
| SMG | NM_001281435 | MAP2K4  | chr17 | 12044463  | 12047148  |
| CNV | NM_001018044 | MAP3K19 | chr2  | 135722060 | 135722486 |
| CNV | NM_001018044 | MAP3K19 | chr2  | 135738390 | 135739088 |
| CNV | NM_001018044 | MAP3K19 | chr2  | 135741245 | 135741395 |
| CNV | NM_001018044 | MAP3K19 | chr2  | 135743369 | 135745823 |
| CNV | NM_001018044 | MAP3K19 | chr2  | 135749106 | 135749150 |
| CNV | NM_001018044 | MAP3K19 | chr2  | 135763004 | 135763101 |
| CNV | NM_001018044 | MAP3K19 | chr2  | 135779284 | 135779400 |
| CNV | NM_001018044 | MAP3K19 | chr2  | 135782195 | 135782248 |
| SMG | NM_001198616 | MAP7    | chr6  | 136663418 | 136665376 |
| SMG | NM_001198616 | MAP7    | chr6  | 136666993 | 136667217 |
| SMG | NM_001198616 | MAP7    | chr6  | 136677829 | 136677932 |
| SMG | NM_001198616 | MAP7    | chr6  | 136680957 | 136681015 |
| SMG | NM_001198616 | MAP7    | chr6  | 136681118 | 136681169 |
| SMG | NM_001198616 | MAP7    | chr6  | 136681834 | 136681936 |
| SMG | NM_001198616 | MAP7    | chr6  | 136682142 | 136682317 |
| SMG | NM_001198616 | MAP7    | chr6  | 136683587 | 136683840 |
| SMG | NM_001198616 | MAP7    | chr6  | 136686872 | 136687156 |
| SMG | NM_001198616 | MAP7    | chr6  | 136687464 | 136687577 |
| SMG | NM_001198616 | MAP7    | chr6  | 136693638 | 136693763 |
| SMG | NM_001198616 | MAP7    | chr6  | 136698892 | 136699006 |
| SMG | NM_001198616 | MAP7    | chr6  | 136709530 | 136709648 |
| SMG | NM_001198616 | MAP7    | chr6  | 136710491 | 136710655 |
| SMG | NM_001198616 | MAP7    | chr6  | 136732757 | 136732835 |
| SMG | NM_001198616 | MAP7    | chr6  | 136742838 | 136742937 |

|     |              |          |       |           |           |
|-----|--------------|----------|-------|-----------|-----------|
| SMG | NM_001198616 | MAP7     | chr6  | 136871479 | 136871957 |
| SMG | NM_002753    | MAPK10   | chr4  | 86936275  | 86938528  |
| SMG | NM_002753    | MAPK10   | chr4  | 86950349  | 86950427  |
| SMG | NM_002753    | MAPK10   | chr4  | 86952520  | 86952584  |
| SMG | NM_002753    | MAPK10   | chr4  | 86985418  | 86985543  |
| SMG | NM_002753    | MAPK10   | chr4  | 86988925  | 86989108  |
| SMG | NM_002753    | MAPK10   | chr4  | 87019676  | 87019748  |
| SMG | NM_002753    | MAPK10   | chr4  | 87022204  | 87022370  |
| SMG | NM_002753    | MAPK10   | chr4  | 87023046  | 87023185  |
| SMG | NM_002753    | MAPK10   | chr4  | 87024338  | 87024397  |
| SMG | NM_002753    | MAPK10   | chr4  | 87028375  | 87028505  |
| SMG | NM_002753    | MAPK10   | chr4  | 87080450  | 87080620  |
| SMG | NM_002753    | MAPK10   | chr4  | 87115488  | 87115560  |
| SMG | NM_002753    | MAPK10   | chr4  | 87275682  | 87275797  |
| SMG | NM_002753    | MAPK10   | chr4  | 87374182  | 87374283  |
| SMG | NM_002752    | MAPK9    | chr5  | 179660594 | 179663526 |
| SMG | NM_002752    | MAPK9    | chr5  | 179665331 | 179665403 |
| SMG | NM_002752    | MAPK9    | chr5  | 179666923 | 179666987 |
| SMG | NM_002752    | MAPK9    | chr5  | 179668030 | 179668155 |
| SMG | NM_002752    | MAPK9    | chr5  | 179669572 | 179669755 |
| SMG | NM_002752    | MAPK9    | chr5  | 179674438 | 179674510 |
| SMG | NM_002752    | MAPK9    | chr5  | 179675972 | 179676138 |
| SMG | NM_002752    | MAPK9    | chr5  | 179688683 | 179688822 |
| SMG | NM_002752    | MAPK9    | chr5  | 179691780 | 179691839 |
| SMG | NM_002752    | MAPK9    | chr5  | 179696279 | 179696409 |
| SMG | NM_002752    | MAPK9    | chr5  | 179707439 | 179707608 |
| SMG | NM_002752    | MAPK9    | chr5  | 179718847 | 179719071 |
| SMG | NM_152598    | MARCH10  | chr17 | 60778674  | 60779119  |
| SMG | NM_152598    | MARCH10  | chr17 | 60782899  | 60782942  |
| SMG | NM_152598    | MARCH10  | chr17 | 60788591  | 60788705  |
| SMG | NM_152598    | MARCH10  | chr17 | 60799848  | 60799958  |
| SMG | NM_152598    | MARCH10  | chr17 | 60802298  | 60802465  |
| SMG | NM_152598    | MARCH10  | chr17 | 60813291  | 60814693  |
| SMG | NM_152598    | MARCH10  | chr17 | 60821736  | 60821889  |
| SMG | NM_152598    | MARCH10  | chr17 | 60837195  | 60837367  |
| SMG | NM_152598    | MARCH10  | chr17 | 60865840  | 60865960  |
| SMG | NM_152598    | MARCH10  | chr17 | 60879006  | 60879113  |
| SMG | NM_152598    | MARCH10  | chr17 | 60885437  | 60885705  |
| SMG | NM_023009    | MARCKSL1 | chr1  | 32799429  | 32800698  |
| SMG | NM_023009    | MARCKSL1 | chr1  | 32801547  | 32801840  |
| SMG | NM_052897    | MBD6     | chr12 | 57916658  | 57916794  |
| SMG | NM_052897    | MBD6     | chr12 | 57917811  | 57917875  |
| SMG | NM_052897    | MBD6     | chr12 | 57918062  | 57918199  |

|     |           |       |       |          |          |
|-----|-----------|-------|-------|----------|----------|
| SMG | NM_052897 | MBD6  | chr12 | 57918502 | 57918605 |
| SMG | NM_052897 | MBD6  | chr12 | 57918735 | 57918898 |
| SMG | NM_052897 | MBD6  | chr12 | 57919130 | 57920171 |
| SMG | NM_052897 | MBD6  | chr12 | 57920348 | 57921010 |
| SMG | NM_052897 | MBD6  | chr12 | 57921289 | 57921443 |
| SMG | NM_052897 | MBD6  | chr12 | 57921630 | 57921800 |
| SMG | NM_052897 | MBD6  | chr12 | 57921929 | 57922343 |
| SMG | NM_052897 | MBD6  | chr12 | 57922448 | 57922501 |
| SMG | NM_052897 | MBD6  | chr12 | 57922728 | 57922792 |
| SMG | NM_052897 | MBD6  | chr12 | 57922942 | 57923931 |
| DRV | NM_005120 | MED12 | chrX  | 70338405 | 70338703 |
| DRV | NM_005120 | MED12 | chrX  | 70339222 | 70339327 |
| DRV | NM_005120 | MED12 | chrX  | 70339535 | 70339727 |
| DRV | NM_005120 | MED12 | chrX  | 70339863 | 70340020 |
| DRV | NM_005120 | MED12 | chrX  | 70340820 | 70341002 |
| DRV | NM_005120 | MED12 | chrX  | 70341176 | 70341287 |
| DRV | NM_005120 | MED12 | chrX  | 70341411 | 70341666 |
| DRV | NM_005120 | MED12 | chrX  | 70342049 | 70342196 |
| DRV | NM_005120 | MED12 | chrX  | 70342357 | 70342457 |
| DRV | NM_005120 | MED12 | chrX  | 70342587 | 70342724 |
| DRV | NM_005120 | MED12 | chrX  | 70342944 | 70343076 |
| DRV | NM_005120 | MED12 | chrX  | 70343443 | 70343570 |
| DRV | NM_005120 | MED12 | chrX  | 70344008 | 70344238 |
| DRV | NM_005120 | MED12 | chrX  | 70344613 | 70344694 |
| DRV | NM_005120 | MED12 | chrX  | 70344825 | 70344996 |
| DRV | NM_005120 | MED12 | chrX  | 70345200 | 70345345 |
| DRV | NM_005120 | MED12 | chrX  | 70345512 | 70345563 |
| DRV | NM_005120 | MED12 | chrX  | 70345885 | 70346004 |
| DRV | NM_005120 | MED12 | chrX  | 70346190 | 70346334 |
| DRV | NM_005120 | MED12 | chrX  | 70346818 | 70346982 |
| DRV | NM_005120 | MED12 | chrX  | 70347185 | 70347317 |
| DRV | NM_005120 | MED12 | chrX  | 70347742 | 70347970 |
| DRV | NM_005120 | MED12 | chrX  | 70348145 | 70348290 |
| DRV | NM_005120 | MED12 | chrX  | 70348447 | 70348568 |
| DRV | NM_005120 | MED12 | chrX  | 70348963 | 70349065 |
| DRV | NM_005120 | MED12 | chrX  | 70349165 | 70349279 |
| DRV | NM_005120 | MED12 | chrX  | 70349529 | 70349705 |
| DRV | NM_005120 | MED12 | chrX  | 70349884 | 70350064 |
| DRV | NM_005120 | MED12 | chrX  | 70351399 | 70351471 |
| DRV | NM_005120 | MED12 | chrX  | 70351922 | 70352056 |
| DRV | NM_005120 | MED12 | chrX  | 70352226 | 70352388 |
| DRV | NM_005120 | MED12 | chrX  | 70352694 | 70352806 |
| DRV | NM_005120 | MED12 | chrX  | 70352972 | 70353062 |

|     |              |       |       |           |           |
|-----|--------------|-------|-------|-----------|-----------|
| DRV | NM_005120    | MED12 | chrX  | 70354206  | 70354316  |
| DRV | NM_005120    | MED12 | chrX  | 70354562  | 70354698  |
| DRV | NM_005120    | MED12 | chrX  | 70354941  | 70355103  |
| DRV | NM_005120    | MED12 | chrX  | 70356130  | 70356505  |
| DRV | NM_005120    | MED12 | chrX  | 70356728  | 70356879  |
| DRV | NM_005120    | MED12 | chrX  | 70357036  | 70357233  |
| DRV | NM_005120    | MED12 | chrX  | 70357407  | 70357485  |
| DRV | NM_005120    | MED12 | chrX  | 70357575  | 70357793  |
| DRV | NM_005120    | MED12 | chrX  | 70360484  | 70360707  |
| DRV | NM_005120    | MED12 | chrX  | 70361079  | 70361220  |
| DRV | NM_005120    | MED12 | chrX  | 70361732  | 70361814  |
| DRV | NM_005120    | MED12 | chrX  | 70362024  | 70362304  |
| LIT | NM_001220482 | MEIS2 | chr15 | 37183221  | 37184660  |
| LIT | NM_001220482 | MEIS2 | chr15 | 37187351  | 37187441  |
| LIT | NM_001220482 | MEIS2 | chr15 | 37188828  | 37188887  |
| LIT | NM_001220482 | MEIS2 | chr15 | 37242524  | 37242601  |
| LIT | NM_001220482 | MEIS2 | chr15 | 37329014  | 37329160  |
| LIT | NM_001220482 | MEIS2 | chr15 | 37375971  | 37376086  |
| LIT | NM_001220482 | MEIS2 | chr15 | 37385781  | 37385931  |
| LIT | NM_001220482 | MEIS2 | chr15 | 37386727  | 37386778  |
| LIT | NM_001220482 | MEIS2 | chr15 | 37387764  | 37387815  |
| LIT | NM_001220482 | MEIS2 | chr15 | 37388489  | 37388631  |
| LIT | NM_001220482 | MEIS2 | chr15 | 37390167  | 37390400  |
| LIT | NM_001220482 | MEIS2 | chr15 | 37391655  | 37391800  |
| LIT | NM_001220482 | MEIS2 | chr15 | 37393092  | 37393500  |
| DRV | NM_000245    | MET   | chr7  | 116312458 | 116312631 |
| DRV | NM_000245    | MET   | chr7  | 116339124 | 116340338 |
| DRV | NM_000245    | MET   | chr7  | 116371721 | 116371913 |
| DRV | NM_000245    | MET   | chr7  | 116380003 | 116380138 |
| DRV | NM_000245    | MET   | chr7  | 116380905 | 116381079 |
| DRV | NM_000245    | MET   | chr7  | 116395408 | 116395569 |
| DRV | NM_000245    | MET   | chr7  | 116397490 | 116397593 |
| DRV | NM_000245    | MET   | chr7  | 116397691 | 116397828 |
| DRV | NM_000245    | MET   | chr7  | 116398512 | 116398674 |
| DRV | NM_000245    | MET   | chr7  | 116399444 | 116399544 |
| DRV | NM_000245    | MET   | chr7  | 116403103 | 116403322 |
| DRV | NM_000245    | MET   | chr7  | 116409698 | 116409845 |
| DRV | NM_000245    | MET   | chr7  | 116411551 | 116411708 |
| DRV | NM_000245    | MET   | chr7  | 116411902 | 116412043 |
| DRV | NM_000245    | MET   | chr7  | 116414934 | 116415165 |
| DRV | NM_000245    | MET   | chr7  | 116417442 | 116417523 |
| DRV | NM_000245    | MET   | chr7  | 116418829 | 116419011 |
| DRV | NM_000245    | MET   | chr7  | 116422041 | 116422151 |



|     |              |        |      |           |           |
|-----|--------------|--------|------|-----------|-----------|
| DRV | NM_000245    | MET    | chr7 | 116423357 | 116423523 |
| DRV | NM_000245    | MET    | chr7 | 116435708 | 116435845 |
| DRV | NM_000245    | MET    | chr7 | 116435940 | 116438440 |
| SMG | NM_024770    | METTL8 | chr2 | 172173912 | 172180872 |
| SMG | NM_024770    | METTL8 | chr2 | 172182350 | 172182416 |
| SMG | NM_024770    | METTL8 | chr2 | 172182551 | 172182658 |
| SMG | NM_024770    | METTL8 | chr2 | 172187068 | 172187208 |
| SMG | NM_024770    | METTL8 | chr2 | 172188313 | 172188377 |
| SMG | NM_024770    | METTL8 | chr2 | 172193962 | 172194012 |
| SMG | NM_024770    | METTL8 | chr2 | 172195693 | 172196064 |
| SMG | NM_024770    | METTL8 | chr2 | 172216931 | 172217023 |
| SMG | NM_024770    | METTL8 | chr2 | 172248552 | 172248707 |
| SMG | NM_024770    | METTL8 | chr2 | 172291183 | 172291312 |
| SMG | NM_001127660 | MFN2   | chr1 | 12040237  | 12040541  |
| SMG | NM_001127660 | MFN2   | chr1 | 12049221  | 12049400  |
| SMG | NM_001127660 | MFN2   | chr1 | 12052611  | 12052747  |
| SMG | NM_001127660 | MFN2   | chr1 | 12056212  | 12056375  |
| SMG | NM_001127660 | MFN2   | chr1 | 12057353  | 12057478  |
| SMG | NM_001127660 | MFN2   | chr1 | 12058826  | 12058935  |
| SMG | NM_001127660 | MFN2   | chr1 | 12059044  | 12059152  |
| SMG | NM_001127660 | MFN2   | chr1 | 12061457  | 12061611  |
| SMG | NM_001127660 | MFN2   | chr1 | 12061825  | 12061893  |
| SMG | NM_001127660 | MFN2   | chr1 | 12062038  | 12062160  |
| SMG | NM_001127660 | MFN2   | chr1 | 12064048  | 12064175  |
| SMG | NM_001127660 | MFN2   | chr1 | 12064565  | 12064670  |
| SMG | NM_001127660 | MFN2   | chr1 | 12064881  | 12064984  |
| SMG | NM_001127660 | MFN2   | chr1 | 12065767  | 12065988  |
| SMG | NM_001127660 | MFN2   | chr1 | 12066594  | 12066750  |
| SMG | NM_001127660 | MFN2   | chr1 | 12067109  | 12067306  |
| SMG | NM_001127660 | MFN2   | chr1 | 12069648  | 12069783  |
| SMG | NM_001127660 | MFN2   | chr1 | 12071552  | 12073572  |
| SMG | NM_152622    | MIER3  | chr5 | 56215428  | 56219412  |
| SMG | NM_152622    | MIER3  | chr5 | 56219517  | 56219660  |
| SMG | NM_152622    | MIER3  | chr5 | 56219741  | 56219869  |
| SMG | NM_152622    | MIER3  | chr5 | 56224593  | 56224685  |
| SMG | NM_152622    | MIER3  | chr5 | 56226490  | 56226572  |
| SMG | NM_152622    | MIER3  | chr5 | 56229073  | 56229225  |
| SMG | NM_152622    | MIER3  | chr5 | 56231254  | 56231327  |
| SMG | NM_152622    | MIER3  | chr5 | 56231492  | 56231578  |
| SMG | NM_152622    | MIER3  | chr5 | 56233404  | 56233525  |
| SMG | NM_152622    | MIER3  | chr5 | 56234709  | 56234844  |
| SMG | NM_152622    | MIER3  | chr5 | 56242752  | 56242898  |
| SMG | NM_152622    | MIER3  | chr5 | 56246454  | 56246479  |

|     |              |       |       |          |          |
|-----|--------------|-------|-------|----------|----------|
| SMG | NM_152622    | MIER3 | chr5  | 56247920 | 56247954 |
| SMG | NM_017572    | MKNK2 | chr19 | 2037469  | 2037828  |
| SMG | NM_017572    | MKNK2 | chr19 | 2040132  | 2040176  |
| SMG | NM_017572    | MKNK2 | chr19 | 2041038  | 2041203  |
| SMG | NM_017572    | MKNK2 | chr19 | 2041838  | 2042033  |
| SMG | NM_017572    | MKNK2 | chr19 | 2042425  | 2042521  |
| SMG | NM_017572    | MKNK2 | chr19 | 2042605  | 2042661  |
| SMG | NM_017572    | MKNK2 | chr19 | 2042764  | 2042869  |
| SMG | NM_017572    | MKNK2 | chr19 | 2043122  | 2043196  |
| SMG | NM_017572    | MKNK2 | chr19 | 2043501  | 2043581  |
| SMG | NM_017572    | MKNK2 | chr19 | 2046184  | 2046282  |
| SMG | NM_017572    | MKNK2 | chr19 | 2046365  | 2046467  |
| SMG | NM_017572    | MKNK2 | chr19 | 2046602  | 2046690  |
| SMG | NM_017572    | MKNK2 | chr19 | 2050799  | 2050946  |
| SMG | NM_017572    | MKNK2 | chr19 | 2051094  | 2051243  |
| LIT | NM_005664    | MKRN3 | chr15 | 23810453 | 23813166 |
| DRV | NM_000249    | MLH1  | chr3  | 37034840 | 37035154 |
| DRV | NM_000249    | MLH1  | chr3  | 37038109 | 37038200 |
| DRV | NM_000249    | MLH1  | chr3  | 37042445 | 37042544 |
| DRV | NM_000249    | MLH1  | chr3  | 37045891 | 37045965 |
| DRV | NM_000249    | MLH1  | chr3  | 37048481 | 37048554 |
| DRV | NM_000249    | MLH1  | chr3  | 37050304 | 37050396 |
| DRV | NM_000249    | MLH1  | chr3  | 37053310 | 37053353 |
| DRV | NM_000249    | MLH1  | chr3  | 37053501 | 37053590 |
| DRV | NM_000249    | MLH1  | chr3  | 37055922 | 37056035 |
| DRV | NM_000249    | MLH1  | chr3  | 37058996 | 37059090 |
| DRV | NM_000249    | MLH1  | chr3  | 37061800 | 37061954 |
| DRV | NM_000249    | MLH1  | chr3  | 37067127 | 37067498 |
| DRV | NM_000249    | MLH1  | chr3  | 37070274 | 37070423 |
| DRV | NM_000249    | MLH1  | chr3  | 37081676 | 37081785 |
| DRV | NM_000249    | MLH1  | chr3  | 37083758 | 37083822 |
| DRV | NM_000249    | MLH1  | chr3  | 37089009 | 37089174 |
| DRV | NM_000249    | MLH1  | chr3  | 37090007 | 37090100 |
| DRV | NM_000249    | MLH1  | chr3  | 37090394 | 37090508 |
| DRV | NM_000249    | MLH1  | chr3  | 37091976 | 37092337 |
| LIT | NM_001040108 | MLH3  | chr14 | 75480466 | 75483904 |
| LIT | NM_001040108 | MLH3  | chr14 | 75485531 | 75485683 |
| LIT | NM_001040108 | MLH3  | chr14 | 75489516 | 75489595 |
| LIT | NM_001040108 | MLH3  | chr14 | 75489697 | 75489721 |
| LIT | NM_001040108 | MLH3  | chr14 | 75497245 | 75497405 |
| LIT | NM_001040108 | MLH3  | chr14 | 75498770 | 75498882 |
| LIT | NM_001040108 | MLH3  | chr14 | 75500121 | 75500193 |
| LIT | NM_001040108 | MLH3  | chr14 | 75505042 | 75505115 |

|     |              |       |       |          |          |
|-----|--------------|-------|-------|----------|----------|
| LIT | NM_001040108 | MLH3  | chr14 | 75506613 | 75506718 |
| LIT | NM_001040108 | MLH3  | chr14 | 75508317 | 75508403 |
| LIT | NM_001040108 | MLH3  | chr14 | 75509081 | 75509180 |
| LIT | NM_001040108 | MLH3  | chr14 | 75513078 | 75516421 |
| LIT | NM_001040108 | MLH3  | chr14 | 75518082 | 75518235 |
| SMG | NM_001507    | MLNR  | chr13 | 49794473 | 49795374 |
| SMG | NM_001507    | MLNR  | chr13 | 49796175 | 49796513 |
| SMG | NM_001272101 | MMP19 | chr12 | 56229213 | 56231158 |
| SMG | NM_001272101 | MMP19 | chr12 | 56231626 | 56231791 |
| SMG | NM_001272101 | MMP19 | chr12 | 56232283 | 56232518 |
| SMG | NM_001272101 | MMP19 | chr12 | 56234450 | 56234666 |
| SMG | NM_001272101 | MMP19 | chr12 | 56234889 | 56235020 |
| SMG | NM_001272101 | MMP19 | chr12 | 56236136 | 56236222 |
| SMG | NM_001272101 | MMP19 | chr12 | 56236527 | 56236767 |
| LIT | NM_001127891 | MMP2  | chr16 | 55515473 | 55515790 |
| LIT | NM_001127891 | MMP2  | chr16 | 55516820 | 55517047 |
| LIT | NM_001127891 | MMP2  | chr16 | 55517927 | 55518076 |
| LIT | NM_001127891 | MMP2  | chr16 | 55519210 | 55519339 |
| LIT | NM_001127891 | MMP2  | chr16 | 55519515 | 55519689 |
| LIT | NM_001127891 | MMP2  | chr16 | 55522454 | 55522628 |
| LIT | NM_001127891 | MMP2  | chr16 | 55523562 | 55523736 |
| LIT | NM_001127891 | MMP2  | chr16 | 55525712 | 55525868 |
| LIT | NM_001127891 | MMP2  | chr16 | 55527069 | 55527205 |
| LIT | NM_001127891 | MMP2  | chr16 | 55530837 | 55530974 |
| LIT | NM_001127891 | MMP2  | chr16 | 55532200 | 55532360 |
| LIT | NM_001127891 | MMP2  | chr16 | 55536690 | 55536800 |
| LIT | NM_001127891 | MMP2  | chr16 | 55539250 | 55540586 |
| DRV | NM_005373    | MPL   | chr1  | 43803474 | 43803598 |
| DRV | NM_005373    | MPL   | chr1  | 43803769 | 43803902 |
| DRV | NM_005373    | MPL   | chr1  | 43804212 | 43804391 |
| DRV | NM_005373    | MPL   | chr1  | 43804941 | 43805240 |
| DRV | NM_005373    | MPL   | chr1  | 43805634 | 43805797 |
| DRV | NM_005373    | MPL   | chr1  | 43806057 | 43806184 |
| DRV | NM_005373    | MPL   | chr1  | 43812115 | 43812300 |
| DRV | NM_005373    | MPL   | chr1  | 43812462 | 43812605 |
| DRV | NM_005373    | MPL   | chr1  | 43814513 | 43814673 |
| DRV | NM_005373    | MPL   | chr1  | 43814933 | 43815030 |
| DRV | NM_005373    | MPL   | chr1  | 43817886 | 43817974 |
| DRV | NM_005373    | MPL   | chr1  | 43818188 | 43820135 |
| SMG | NM_016447    | MPP6  | chr7  | 24613084 | 24613212 |
| SMG | NM_016447    | MPP6  | chr7  | 24659670 | 24659839 |
| SMG | NM_016447    | MPP6  | chr7  | 24663284 | 24663403 |
| SMG | NM_016447    | MPP6  | chr7  | 24681334 | 24681487 |

|     |           |       |       |          |          |
|-----|-----------|-------|-------|----------|----------|
| SMG | NM_016447 | MPP6  | chr7  | 24689230 | 24689383 |
| SMG | NM_016447 | MPP6  | chr7  | 24690103 | 24690331 |
| SMG | NM_016447 | MPP6  | chr7  | 24703208 | 24703340 |
| SMG | NM_016447 | MPP6  | chr7  | 24705206 | 24705306 |
| SMG | NM_016447 | MPP6  | chr7  | 24705639 | 24705708 |
| SMG | NM_016447 | MPP6  | chr7  | 24708117 | 24708279 |
| SMG | NM_016447 | MPP6  | chr7  | 24718749 | 24718952 |
| SMG | NM_016447 | MPP6  | chr7  | 24720010 | 24720139 |
| SMG | NM_016447 | MPP6  | chr7  | 24727056 | 24727498 |
| SMG | NM_000139 | MS4A2 | chr11 | 59856136 | 59856294 |
| SMG | NM_000139 | MS4A2 | chr11 | 59857164 | 59857294 |
| SMG | NM_000139 | MS4A2 | chr11 | 59857808 | 59857943 |
| SMG | NM_000139 | MS4A2 | chr11 | 59860264 | 59860321 |
| SMG | NM_000139 | MS4A2 | chr11 | 59860872 | 59861031 |
| SMG | NM_000139 | MS4A2 | chr11 | 59861436 | 59861535 |
| SMG | NM_000139 | MS4A2 | chr11 | 59863030 | 59865940 |
| DRV | NM_000251 | MSH2  | chr2  | 47630205 | 47630541 |
| DRV | NM_000251 | MSH2  | chr2  | 47635539 | 47635694 |
| DRV | NM_000251 | MSH2  | chr2  | 47637232 | 47637511 |
| DRV | NM_000251 | MSH2  | chr2  | 47639552 | 47639699 |
| DRV | NM_000251 | MSH2  | chr2  | 47641407 | 47641557 |
| DRV | NM_000251 | MSH2  | chr2  | 47643434 | 47643568 |
| DRV | NM_000251 | MSH2  | chr2  | 47656880 | 47657080 |
| DRV | NM_000251 | MSH2  | chr2  | 47672686 | 47672796 |
| DRV | NM_000251 | MSH2  | chr2  | 47690169 | 47690293 |
| DRV | NM_000251 | MSH2  | chr2  | 47693796 | 47693947 |
| DRV | NM_000251 | MSH2  | chr2  | 47698103 | 47698201 |
| DRV | NM_000251 | MSH2  | chr2  | 47702163 | 47702409 |
| DRV | NM_000251 | MSH2  | chr2  | 47703505 | 47703710 |
| DRV | NM_000251 | MSH2  | chr2  | 47705410 | 47705658 |
| DRV | NM_000251 | MSH2  | chr2  | 47707834 | 47708010 |
| DRV | NM_000251 | MSH2  | chr2  | 47709917 | 47710367 |
| LIT | NM_002439 | MSH3  | chr5  | 79950466 | 79950783 |
| LIT | NM_002439 | MSH3  | chr5  | 79952229 | 79952350 |
| LIT | NM_002439 | MSH3  | chr5  | 79960961 | 79961182 |
| LIT | NM_002439 | MSH3  | chr5  | 79965915 | 79966128 |
| LIT | NM_002439 | MSH3  | chr5  | 79968062 | 79968179 |
| LIT | NM_002439 | MSH3  | chr5  | 79968559 | 79968677 |
| LIT | NM_002439 | MSH3  | chr5  | 79970801 | 79970947 |
| LIT | NM_002439 | MSH3  | chr5  | 79974745 | 79974912 |
| LIT | NM_002439 | MSH3  | chr5  | 80021271 | 80021384 |
| LIT | NM_002439 | MSH3  | chr5  | 80024669 | 80024784 |
| LIT | NM_002439 | MSH3  | chr5  | 80037282 | 80037367 |

|     |           |      |               |          |          |
|-----|-----------|------|---------------|----------|----------|
| LIT | NM_002439 | MSH3 | chr5          | 80040324 | 80040434 |
| LIT | NM_002439 | MSH3 | chr5          | 80057364 | 80057497 |
| LIT | NM_002439 | MSH3 | chr5          | 80063751 | 80063939 |
| LIT | NM_002439 | MSH3 | chr5          | 80064653 | 80064822 |
| LIT | NM_002439 | MSH3 | chr5          | 80071512 | 80071577 |
| LIT | NM_002439 | MSH3 | chr5          | 80074538 | 80074655 |
| LIT | NM_002439 | MSH3 | chr5          | 80083383 | 80083491 |
| LIT | NM_002439 | MSH3 | chr5          | 80088551 | 80088663 |
| LIT | NM_002439 | MSH3 | chr5          | 80109402 | 80109560 |
| LIT | NM_002439 | MSH3 | chr5          | 80149948 | 80150135 |
| LIT | NM_002439 | MSH3 | chr5          | 80160631 | 80160761 |
| LIT | NM_002439 | MSH3 | chr5          | 80168934 | 80169106 |
| LIT | NM_002439 | MSH3 | chr5          | 80171569 | 80172634 |
| SMG | NM_172166 | MSH5 | chr6_mcf_hap5 | 3087408  | 3087523  |
| SMG | NM_172166 | MSH5 | chr6_mcf_hap5 | 3087914  | 3088074  |
| SMG | NM_172166 | MSH5 | chr6_mcf_hap5 | 3088623  | 3088747  |
| SMG | NM_172166 | MSH5 | chr6_mcf_hap5 | 3090333  | 3090414  |
| SMG | NM_172166 | MSH5 | chr6_mcf_hap5 | 3090564  | 3090627  |
| SMG | NM_172166 | MSH5 | chr6_mcf_hap5 | 3091360  | 3091482  |
| SMG | NM_172166 | MSH5 | chr6_mcf_hap5 | 3091646  | 3091756  |
| SMG | NM_172166 | MSH5 | chr6_mcf_hap5 | 3092002  | 3092038  |
| SMG | NM_172166 | MSH5 | chr6_mcf_hap5 | 3092693  | 3092776  |
| SMG | NM_172166 | MSH5 | chr6_mcf_hap5 | 3094855  | 3094901  |
| SMG | NM_172166 | MSH5 | chr6_mcf_hap5 | 3100766  | 3100905  |
| SMG | NM_172166 | MSH5 | chr6_mcf_hap5 | 3101032  | 3101095  |
| SMG | NM_172166 | MSH5 | chr6_mcf_hap5 | 3105638  | 3105767  |
| SMG | NM_172166 | MSH5 | chr6_mcf_hap5 | 3106021  | 3106094  |
| SMG | NM_172166 | MSH5 | chr6_mcf_hap5 | 3106239  | 3106349  |
| SMG | NM_172166 | MSH5 | chr6_mcf_hap5 | 3106570  | 3106651  |
| SMG | NM_172166 | MSH5 | chr6_mcf_hap5 | 3106898  | 3106986  |
| SMG | NM_172166 | MSH5 | chr6_mcf_hap5 | 3107259  | 3107449  |
| SMG | NM_172166 | MSH5 | chr6_mcf_hap5 | 3107563  | 3107690  |
| SMG | NM_172166 | MSH5 | chr6_mcf_hap5 | 3108163  | 3108313  |
| SMG | NM_172166 | MSH5 | chr6_mcf_hap5 | 3108661  | 3108736  |
| SMG | NM_172166 | MSH5 | chr6_mcf_hap5 | 3108945  | 3109089  |
| SMG | NM_172166 | MSH5 | chr6_mcf_hap5 | 3109291  | 3109429  |
| SMG | NM_172166 | MSH5 | chr6_mcf_hap5 | 3109585  | 3109659  |
| SMG | NM_172166 | MSH5 | chr6_mcf_hap5 | 3109893  | 3110152  |
| DRV | NM_000179 | MSH6 | chr2          | 48010220 | 48010632 |
| DRV | NM_000179 | MSH6 | chr2          | 48018065 | 48018262 |
| DRV | NM_000179 | MSH6 | chr2          | 48023032 | 48023202 |
| DRV | NM_000179 | MSH6 | chr2          | 48025749 | 48028294 |
| DRV | NM_000179 | MSH6 | chr2          | 48030558 | 48030824 |

|     |              |        |       |           |           |
|-----|--------------|--------|-------|-----------|-----------|
| DRV | NM_000179    | MSH6   | chr2  | 48032048  | 48032166  |
| DRV | NM_000179    | MSH6   | chr2  | 48032756  | 48032846  |
| DRV | NM_000179    | MSH6   | chr2  | 48033342  | 48033497  |
| DRV | NM_000179    | MSH6   | chr2  | 48033590  | 48033790  |
| DRV | NM_000179    | MSH6   | chr2  | 48033917  | 48034092  |
| SMG | NM_005956    | MTHFD1 | chr14 | 64854758  | 64855186  |
| SMG | NM_005956    | MTHFD1 | chr14 | 64867510  | 64867595  |
| SMG | NM_005956    | MTHFD1 | chr14 | 64877807  | 64877867  |
| SMG | NM_005956    | MTHFD1 | chr14 | 64879189  | 64879243  |
| SMG | NM_005956    | MTHFD1 | chr14 | 64882075  | 64882212  |
| SMG | NM_005956    | MTHFD1 | chr14 | 64882356  | 64882457  |
| SMG | NM_005956    | MTHFD1 | chr14 | 64884605  | 64884742  |
| SMG | NM_005956    | MTHFD1 | chr14 | 64886531  | 64886643  |
| SMG | NM_005956    | MTHFD1 | chr14 | 64891521  | 64891649  |
| SMG | NM_005956    | MTHFD1 | chr14 | 64892447  | 64892545  |
| SMG | NM_005956    | MTHFD1 | chr14 | 64892736  | 64892910  |
| SMG | NM_005956    | MTHFD1 | chr14 | 64894054  | 64894191  |
| SMG | NM_005956    | MTHFD1 | chr14 | 64896901  | 64896948  |
| SMG | NM_005956    | MTHFD1 | chr14 | 64898249  | 64898357  |
| SMG | NM_005956    | MTHFD1 | chr14 | 64898504  | 64898579  |
| SMG | NM_005956    | MTHFD1 | chr14 | 64902286  | 64902389  |
| SMG | NM_005956    | MTHFD1 | chr14 | 64905813  | 64905890  |
| SMG | NM_005956    | MTHFD1 | chr14 | 64906843  | 64906984  |
| SMG | NM_005956    | MTHFD1 | chr14 | 64908102  | 64908171  |
| SMG | NM_005956    | MTHFD1 | chr14 | 64908771  | 64908883  |
| SMG | NM_005956    | MTHFD1 | chr14 | 64908980  | 64909120  |
| SMG | NM_005956    | MTHFD1 | chr14 | 64911410  | 64911452  |
| SMG | NM_005956    | MTHFD1 | chr14 | 64914934  | 64915035  |
| SMG | NM_005956    | MTHFD1 | chr14 | 64916162  | 64916340  |
| SMG | NM_005956    | MTHFD1 | chr14 | 64920471  | 64920579  |
| SMG | NM_005956    | MTHFD1 | chr14 | 64921440  | 64921593  |
| SMG | NM_005956    | MTHFD1 | chr14 | 64924931  | 64925025  |
| SMG | NM_005956    | MTHFD1 | chr14 | 64926476  | 64926725  |
| SMG | NM_001282506 | MUC20  | chr3  | 195447752 | 195447954 |
| SMG | NM_001282506 | MUC20  | chr3  | 195451550 | 195453443 |
| SMG | NM_001282506 | MUC20  | chr3  | 195456518 | 195456610 |
| SMG | NM_001282506 | MUC20  | chr3  | 195460020 | 195460424 |
| SMG | NM_001145006 | MUC7   | chr4  | 71296208  | 71296404  |
| SMG | NM_001145006 | MUC7   | chr4  | 71337931  | 71338008  |
| SMG | NM_001145006 | MUC7   | chr4  | 71339723  | 71339792  |
| SMG | NM_001145006 | MUC7   | chr4  | 71346515  | 71348714  |
| LIT | NM_001048171 | MUTYH  | chr1  | 45794913  | 45795109  |
| LIT | NM_001048171 | MUTYH  | chr1  | 45796187  | 45796229  |

|     |              |       |       |           |           |
|-----|--------------|-------|-------|-----------|-----------|
| LIT | NM_001048171 | MUTYH | chr1  | 45796853  | 45797006  |
| LIT | NM_001048171 | MUTYH | chr1  | 45797091  | 45797228  |
| LIT | NM_001048171 | MUTYH | chr1  | 45797332  | 45797521  |
| LIT | NM_001048171 | MUTYH | chr1  | 45797694  | 45797758  |
| LIT | NM_001048171 | MUTYH | chr1  | 45797837  | 45797982  |
| LIT | NM_001048171 | MUTYH | chr1  | 45798062  | 45798160  |
| LIT | NM_001048171 | MUTYH | chr1  | 45798245  | 45798359  |
| LIT | NM_001048171 | MUTYH | chr1  | 45798434  | 45798506  |
| LIT | NM_001048171 | MUTYH | chr1  | 45798589  | 45798631  |
| LIT | NM_001048171 | MUTYH | chr1  | 45798768  | 45798842  |
| LIT | NM_001048171 | MUTYH | chr1  | 45798956  | 45798996  |
| LIT | NM_001048171 | MUTYH | chr1  | 45799084  | 45799233  |
| LIT | NM_001048171 | MUTYH | chr1  | 45800062  | 45800183  |
| LIT | NM_001048171 | MUTYH | chr1  | 45805890  | 45806142  |
| SMG | NM_001202513 | MXD1  | chr2  | 70142172  | 70142535  |
| SMG | NM_001202513 | MXD1  | chr2  | 70143252  | 70143352  |
| SMG | NM_001202513 | MXD1  | chr2  | 70148867  | 70148897  |
| SMG | NM_001202513 | MXD1  | chr2  | 70162482  | 70162597  |
| SMG | NM_001202513 | MXD1  | chr2  | 70164366  | 70164526  |
| SMG | NM_001202513 | MXD1  | chr2  | 70165231  | 70170076  |
| SMG | NM_130439    | MXI1  | chr10 | 111967362 | 111967840 |
| SMG | NM_130439    | MXI1  | chr10 | 111987946 | 111988079 |
| SMG | NM_130439    | MXI1  | chr10 | 112004585 | 112004615 |
| SMG | NM_130439    | MXI1  | chr10 | 112038937 | 112039052 |
| SMG | NM_130439    | MXI1  | chr10 | 112039671 | 112039843 |
| SMG | NM_130439    | MXI1  | chr10 | 112044581 | 112047123 |
| CNV | NM_001080416 | MYBL1 | chr8  | 67474409  | 67477060  |
| CNV | NM_001080416 | MYBL1 | chr8  | 67478298  | 67478478  |
| CNV | NM_001080416 | MYBL1 | chr8  | 67478918  | 67479023  |
| CNV | NM_001080416 | MYBL1 | chr8  | 67479110  | 67479227  |
| CNV | NM_001080416 | MYBL1 | chr8  | 67484716  | 67484831  |
| CNV | NM_001080416 | MYBL1 | chr8  | 67485598  | 67485741  |
| CNV | NM_001080416 | MYBL1 | chr8  | 67488241  | 67488610  |
| CNV | NM_001080416 | MYBL1 | chr8  | 67492367  | 67492601  |
| CNV | NM_001080416 | MYBL1 | chr8  | 67504674  | 67504779  |
| CNV | NM_001080416 | MYBL1 | chr8  | 67505354  | 67505429  |
| CNV | NM_001080416 | MYBL1 | chr8  | 67507817  | 67507992  |
| CNV | NM_001080416 | MYBL1 | chr8  | 67509564  | 67509785  |
| CNV | NM_001080416 | MYBL1 | chr8  | 67511284  | 67511377  |
| CNV | NM_001080416 | MYBL1 | chr8  | 67513932  | 67514004  |
| CNV | NM_001080416 | MYBL1 | chr8  | 67514652  | 67514758  |
| CNV | NM_001080416 | MYBL1 | chr8  | 67525053  | 67525480  |
| SMG | NM_001130158 | MYO1B | chr2  | 192110106 | 192110352 |

|     |              |       |       |           |           |
|-----|--------------|-------|-------|-----------|-----------|
| SMG | NM_001130158 | MYO1B | chr2  | 192141612 | 192141756 |
| SMG | NM_001130158 | MYO1B | chr2  | 192160836 | 192160952 |
| SMG | NM_001130158 | MYO1B | chr2  | 192194660 | 192194755 |
| SMG | NM_001130158 | MYO1B | chr2  | 192206186 | 192206291 |
| SMG | NM_001130158 | MYO1B | chr2  | 192210961 | 192211008 |
| SMG | NM_001130158 | MYO1B | chr2  | 192214887 | 192214951 |
| SMG | NM_001130158 | MYO1B | chr2  | 192225356 | 192225455 |
| SMG | NM_001130158 | MYO1B | chr2  | 192226993 | 192227097 |
| SMG | NM_001130158 | MYO1B | chr2  | 192228453 | 192228601 |
| SMG | NM_001130158 | MYO1B | chr2  | 192228883 | 192229002 |
| SMG | NM_001130158 | MYO1B | chr2  | 192234267 | 192234354 |
| SMG | NM_001130158 | MYO1B | chr2  | 192234952 | 192235018 |
| SMG | NM_001130158 | MYO1B | chr2  | 192246187 | 192246292 |
| SMG | NM_001130158 | MYO1B | chr2  | 192248005 | 192248068 |
| SMG | NM_001130158 | MYO1B | chr2  | 192250609 | 192250810 |
| SMG | NM_001130158 | MYO1B | chr2  | 192251949 | 192252176 |
| SMG | NM_001130158 | MYO1B | chr2  | 192255017 | 192255218 |
| SMG | NM_001130158 | MYO1B | chr2  | 192256833 | 192256927 |
| SMG | NM_001130158 | MYO1B | chr2  | 192257798 | 192257948 |
| SMG | NM_001130158 | MYO1B | chr2  | 192261154 | 192261223 |
| SMG | NM_001130158 | MYO1B | chr2  | 192265107 | 192265194 |
| SMG | NM_001130158 | MYO1B | chr2  | 192265474 | 192265561 |
| SMG | NM_001130158 | MYO1B | chr2  | 192267357 | 192267444 |
| SMG | NM_001130158 | MYO1B | chr2  | 192272840 | 192272915 |
| SMG | NM_001130158 | MYO1B | chr2  | 192273769 | 192273904 |
| SMG | NM_001130158 | MYO1B | chr2  | 192275791 | 192275898 |
| SMG | NM_001130158 | MYO1B | chr2  | 192278773 | 192278906 |
| SMG | NM_001130158 | MYO1B | chr2  | 192279242 | 192279395 |
| SMG | NM_001130158 | MYO1B | chr2  | 192280840 | 192280968 |
| SMG | NM_001130158 | MYO1B | chr2  | 192288562 | 192290115 |
| SMG | NM_018728    | MYO5C | chr15 | 52484514  | 52486251  |
| SMG | NM_018728    | MYO5C | chr15 | 52487573  | 52487654  |
| SMG | NM_018728    | MYO5C | chr15 | 52488505  | 52488680  |
| SMG | NM_018728    | MYO5C | chr15 | 52497061  | 52497344  |
| SMG | NM_018728    | MYO5C | chr15 | 52498012  | 52498163  |
| SMG | NM_018728    | MYO5C | chr15 | 52500750  | 52500840  |
| SMG | NM_018728    | MYO5C | chr15 | 52503926  | 52504081  |
| SMG | NM_018728    | MYO5C | chr15 | 52505384  | 52505483  |
| SMG | NM_018728    | MYO5C | chr15 | 52506799  | 52506887  |
| SMG | NM_018728    | MYO5C | chr15 | 52510715  | 52510884  |
| SMG | NM_018728    | MYO5C | chr15 | 52511955  | 52512019  |
| SMG | NM_018728    | MYO5C | chr15 | 52513358  | 52513452  |
| SMG | NM_018728    | MYO5C | chr15 | 52515740  | 52515921  |



|     |           |       |       |          |          |
|-----|-----------|-------|-------|----------|----------|
| SMG | NM_018728 | MYO5C | chr15 | 52517097 | 52517178 |
| SMG | NM_018728 | MYO5C | chr15 | 52517271 | 52517335 |
| SMG | NM_018728 | MYO5C | chr15 | 52517635 | 52517729 |
| SMG | NM_018728 | MYO5C | chr15 | 52521329 | 52521510 |
| SMG | NM_018728 | MYO5C | chr15 | 52524818 | 52524882 |
| SMG | NM_018728 | MYO5C | chr15 | 52527866 | 52527960 |
| SMG | NM_018728 | MYO5C | chr15 | 52529678 | 52529843 |
| SMG | NM_018728 | MYO5C | chr15 | 52531929 | 52532076 |
| SMG | NM_018728 | MYO5C | chr15 | 52534244 | 52534410 |
| SMG | NM_018728 | MYO5C | chr15 | 52536552 | 52536764 |
| SMG | NM_018728 | MYO5C | chr15 | 52537550 | 52537662 |
| SMG | NM_018728 | MYO5C | chr15 | 52538152 | 52538239 |
| SMG | NM_018728 | MYO5C | chr15 | 52539113 | 52539211 |
| SMG | NM_018728 | MYO5C | chr15 | 52539654 | 52539789 |
| SMG | NM_018728 | MYO5C | chr15 | 52540896 | 52540980 |
| SMG | NM_018728 | MYO5C | chr15 | 52543586 | 52543712 |
| SMG | NM_018728 | MYO5C | chr15 | 52545513 | 52545654 |
| SMG | NM_018728 | MYO5C | chr15 | 52548835 | 52548917 |
| SMG | NM_018728 | MYO5C | chr15 | 52553058 | 52553324 |
| SMG | NM_018728 | MYO5C | chr15 | 52556386 | 52556493 |
| SMG | NM_018728 | MYO5C | chr15 | 52561949 | 52562057 |
| SMG | NM_018728 | MYO5C | chr15 | 52563959 | 52564041 |
| SMG | NM_018728 | MYO5C | chr15 | 52564776 | 52564920 |
| SMG | NM_018728 | MYO5C | chr15 | 52567758 | 52567915 |
| SMG | NM_018728 | MYO5C | chr15 | 52571069 | 52571214 |
| SMG | NM_018728 | MYO5C | chr15 | 52571705 | 52571871 |
| SMG | NM_018728 | MYO5C | chr15 | 52574978 | 52575089 |
| SMG | NM_018728 | MYO5C | chr15 | 52587806 | 52587995 |
| CNV | NM_003970 | MYOM2 | chr8  | 1993157  | 1993283  |
| CNV | NM_003970 | MYOM2 | chr8  | 1998868  | 1998987  |
| CNV | NM_003970 | MYOM2 | chr8  | 2000275  | 2000431  |
| CNV | NM_003970 | MYOM2 | chr8  | 2005465  | 2005604  |
| CNV | NM_003970 | MYOM2 | chr8  | 2005740  | 2005898  |
| CNV | NM_003970 | MYOM2 | chr8  | 2007273  | 2007366  |
| CNV | NM_003970 | MYOM2 | chr8  | 2017396  | 2017485  |
| CNV | NM_003970 | MYOM2 | chr8  | 2017565  | 2017616  |
| CNV | NM_003970 | MYOM2 | chr8  | 2020424  | 2020589  |
| CNV | NM_003970 | MYOM2 | chr8  | 2021418  | 2021580  |
| CNV | NM_003970 | MYOM2 | chr8  | 2024220  | 2024362  |
| CNV | NM_003970 | MYOM2 | chr8  | 2026814  | 2027014  |
| CNV | NM_003970 | MYOM2 | chr8  | 2027640  | 2027694  |
| CNV | NM_003970 | MYOM2 | chr8  | 2033394  | 2033522  |
| CNV | NM_003970 | MYOM2 | chr8  | 2037830  | 2038014  |

|     |           |          |       |           |           |
|-----|-----------|----------|-------|-----------|-----------|
| CNV | NM_003970 | MYOM2    | chr8  | 2040173   | 2040348   |
| CNV | NM_003970 | MYOM2    | chr8  | 2041796   | 2041918   |
| CNV | NM_003970 | MYOM2    | chr8  | 2044086   | 2044274   |
| CNV | NM_003970 | MYOM2    | chr8  | 2046686   | 2046813   |
| CNV | NM_003970 | MYOM2    | chr8  | 2048665   | 2048844   |
| CNV | NM_003970 | MYOM2    | chr8  | 2050456   | 2050571   |
| CNV | NM_003970 | MYOM2    | chr8  | 2054031   | 2054188   |
| CNV | NM_003970 | MYOM2    | chr8  | 2054280   | 2054387   |
| CNV | NM_003970 | MYOM2    | chr8  | 2056576   | 2056621   |
| CNV | NM_003970 | MYOM2    | chr8  | 2057185   | 2057322   |
| CNV | NM_003970 | MYOM2    | chr8  | 2063751   | 2063896   |
| CNV | NM_003970 | MYOM2    | chr8  | 2064009   | 2064069   |
| CNV | NM_003970 | MYOM2    | chr8  | 2065673   | 2065741   |
| CNV | NM_003970 | MYOM2    | chr8  | 2071124   | 2071238   |
| CNV | NM_003970 | MYOM2    | chr8  | 2071427   | 2071515   |
| CNV | NM_003970 | MYOM2    | chr8  | 2072051   | 2072090   |
| CNV | NM_003970 | MYOM2    | chr8  | 2077114   | 2077220   |
| CNV | NM_003970 | MYOM2    | chr8  | 2088645   | 2088809   |
| CNV | NM_003970 | MYOM2    | chr8  | 2089063   | 2089100   |
| CNV | NM_003970 | MYOM2    | chr8  | 2090299   | 2090322   |
| CNV | NM_003970 | MYOM2    | chr8  | 2091324   | 2091380   |
| CNV | NM_003970 | MYOM2    | chr8  | 2092587   | 2093380   |
| CNV | NM_207015 | NAALADL2 | chr3  | 174577110 | 174577240 |
| CNV | NM_207015 | NAALADL2 | chr3  | 174814579 | 174815081 |
| CNV | NM_207015 | NAALADL2 | chr3  | 174951720 | 174951994 |
| CNV | NM_207015 | NAALADL2 | chr3  | 174974199 | 174974319 |
| CNV | NM_207015 | NAALADL2 | chr3  | 175041963 | 175042114 |
| CNV | NM_207015 | NAALADL2 | chr3  | 175165016 | 175165160 |
| CNV | NM_207015 | NAALADL2 | chr3  | 175181188 | 175181281 |
| CNV | NM_207015 | NAALADL2 | chr3  | 175184766 | 175184972 |
| CNV | NM_207015 | NAALADL2 | chr3  | 175189426 | 175189546 |
| CNV | NM_207015 | NAALADL2 | chr3  | 175293828 | 175293975 |
| CNV | NM_207015 | NAALADL2 | chr3  | 175345078 | 175345174 |
| CNV | NM_207015 | NAALADL2 | chr3  | 175455093 | 175455187 |
| CNV | NM_207015 | NAALADL2 | chr3  | 175473007 | 175473206 |
| CNV | NM_207015 | NAALADL2 | chr3  | 175520792 | 175523428 |
| SMG | NM_000263 | NAGLU    | chr17 | 40687950  | 40688673  |
| SMG | NM_000263 | NAGLU    | chr17 | 40689415  | 40689563  |
| SMG | NM_000263 | NAGLU    | chr17 | 40690356  | 40690503  |
| SMG | NM_000263 | NAGLU    | chr17 | 40690687  | 40690773  |
| SMG | NM_000263 | NAGLU    | chr17 | 40692967  | 40693224  |
| SMG | NM_000263 | NAGLU    | chr17 | 40695045  | 40696466  |
| SMG | NM_052867 | NALCN    | chr13 | 101706129 | 101707840 |

|     |           |       |       |           |           |
|-----|-----------|-------|-------|-----------|-----------|
| SMG | NM_052867 | NALCN | chr13 | 101710290 | 101710408 |
| SMG | NM_052867 | NALCN | chr13 | 101712169 | 101712319 |
| SMG | NM_052867 | NALCN | chr13 | 101714319 | 101714470 |
| SMG | NM_052867 | NALCN | chr13 | 101717755 | 101717913 |
| SMG | NM_052867 | NALCN | chr13 | 101720269 | 101720385 |
| SMG | NM_052867 | NALCN | chr13 | 101721046 | 101721179 |
| SMG | NM_052867 | NALCN | chr13 | 101725935 | 101726029 |
| SMG | NM_052867 | NALCN | chr13 | 101726864 | 101727013 |
| SMG | NM_052867 | NALCN | chr13 | 101728223 | 101728292 |
| SMG | NM_052867 | NALCN | chr13 | 101733877 | 101733997 |
| SMG | NM_052867 | NALCN | chr13 | 101735159 | 101735234 |
| SMG | NM_052867 | NALCN | chr13 | 101735442 | 101735549 |
| SMG | NM_052867 | NALCN | chr13 | 101736061 | 101736155 |
| SMG | NM_052867 | NALCN | chr13 | 101742013 | 101742112 |
| SMG | NM_052867 | NALCN | chr13 | 101742196 | 101742317 |
| SMG | NM_052867 | NALCN | chr13 | 101747924 | 101748031 |
| SMG | NM_052867 | NALCN | chr13 | 101753134 | 101753239 |
| SMG | NM_052867 | NALCN | chr13 | 101755522 | 101755690 |
| SMG | NM_052867 | NALCN | chr13 | 101756645 | 101756777 |
| SMG | NM_052867 | NALCN | chr13 | 101756880 | 101757001 |
| SMG | NM_052867 | NALCN | chr13 | 101757244 | 101757301 |
| SMG | NM_052867 | NALCN | chr13 | 101759837 | 101759960 |
| SMG | NM_052867 | NALCN | chr13 | 101760048 | 101760140 |
| SMG | NM_052867 | NALCN | chr13 | 101762969 | 101763039 |
| SMG | NM_052867 | NALCN | chr13 | 101763475 | 101763577 |
| SMG | NM_052867 | NALCN | chr13 | 101776958 | 101777032 |
| SMG | NM_052867 | NALCN | chr13 | 101795430 | 101795572 |
| SMG | NM_052867 | NALCN | chr13 | 101797110 | 101797247 |
| SMG | NM_052867 | NALCN | chr13 | 101828650 | 101828725 |
| SMG | NM_052867 | NALCN | chr13 | 101844267 | 101844405 |
| SMG | NM_052867 | NALCN | chr13 | 101881743 | 101881935 |
| SMG | NM_052867 | NALCN | chr13 | 101890105 | 101890273 |
| SMG | NM_052867 | NALCN | chr13 | 101910793 | 101910925 |
| SMG | NM_052867 | NALCN | chr13 | 101936283 | 101936370 |
| SMG | NM_052867 | NALCN | chr13 | 101944340 | 101944445 |
| SMG | NM_052867 | NALCN | chr13 | 101944574 | 101944717 |
| SMG | NM_052867 | NALCN | chr13 | 101997616 | 101997771 |
| SMG | NM_052867 | NALCN | chr13 | 102029050 | 102029179 |
| SMG | NM_052867 | NALCN | chr13 | 102029267 | 102029407 |
| SMG | NM_052867 | NALCN | chr13 | 102030920 | 102031004 |
| SMG | NM_052867 | NALCN | chr13 | 102047533 | 102047716 |
| SMG | NM_052867 | NALCN | chr13 | 102051369 | 102051516 |
| SMG | NM_052867 | NALCN | chr13 | 102068663 | 102068813 |

|     |           |      |       |          |          |
|-----|-----------|------|-------|----------|----------|
| CNV | NM_015678 | NBEA | chr13 | 35516423 | 35517251 |
| CNV | NM_015678 | NBEA | chr13 | 35615069 | 35615301 |
| CNV | NM_015678 | NBEA | chr13 | 35619083 | 35619184 |
| CNV | NM_015678 | NBEA | chr13 | 35619442 | 35619538 |
| CNV | NM_015678 | NBEA | chr13 | 35622699 | 35622821 |
| CNV | NM_015678 | NBEA | chr13 | 35624405 | 35624532 |
| CNV | NM_015678 | NBEA | chr13 | 35630146 | 35630266 |
| CNV | NM_015678 | NBEA | chr13 | 35632853 | 35633000 |
| CNV | NM_015678 | NBEA | chr13 | 35644044 | 35644242 |
| CNV | NM_015678 | NBEA | chr13 | 35644855 | 35644989 |
| CNV | NM_015678 | NBEA | chr13 | 35672433 | 35672542 |
| CNV | NM_015678 | NBEA | chr13 | 35683426 | 35683579 |
| CNV | NM_015678 | NBEA | chr13 | 35684946 | 35685115 |
| CNV | NM_015678 | NBEA | chr13 | 35691550 | 35691630 |
| CNV | NM_015678 | NBEA | chr13 | 35692364 | 35692427 |
| CNV | NM_015678 | NBEA | chr13 | 35692513 | 35692611 |
| CNV | NM_015678 | NBEA | chr13 | 35697618 | 35697711 |
| CNV | NM_015678 | NBEA | chr13 | 35716405 | 35716514 |
| CNV | NM_015678 | NBEA | chr13 | 35729910 | 35729992 |
| CNV | NM_015678 | NBEA | chr13 | 35730219 | 35730343 |
| CNV | NM_015678 | NBEA | chr13 | 35731214 | 35731407 |
| CNV | NM_015678 | NBEA | chr13 | 35733152 | 35734169 |
| CNV | NM_015678 | NBEA | chr13 | 35735886 | 35736104 |
| CNV | NM_015678 | NBEA | chr13 | 35738492 | 35738647 |
| CNV | NM_015678 | NBEA | chr13 | 35739230 | 35739235 |
| CNV | NM_015678 | NBEA | chr13 | 35745405 | 35745589 |
| CNV | NM_015678 | NBEA | chr13 | 35747600 | 35747731 |
| CNV | NM_015678 | NBEA | chr13 | 35751132 | 35751240 |
| CNV | NM_015678 | NBEA | chr13 | 35756496 | 35756665 |
| CNV | NM_015678 | NBEA | chr13 | 35758112 | 35758208 |
| CNV | NM_015678 | NBEA | chr13 | 35770000 | 35770439 |
| CNV | NM_015678 | NBEA | chr13 | 35782836 | 35782991 |
| CNV | NM_015678 | NBEA | chr13 | 35785189 | 35785316 |
| CNV | NM_015678 | NBEA | chr13 | 35806628 | 35806756 |
| CNV | NM_015678 | NBEA | chr13 | 35864525 | 35864587 |
| CNV | NM_015678 | NBEA | chr13 | 35883664 | 35883729 |
| CNV | NM_015678 | NBEA | chr13 | 35923244 | 35923353 |
| CNV | NM_015678 | NBEA | chr13 | 35926293 | 35926460 |
| CNV | NM_015678 | NBEA | chr13 | 36006405 | 36006530 |
| CNV | NM_015678 | NBEA | chr13 | 36026228 | 36026372 |
| CNV | NM_015678 | NBEA | chr13 | 36046536 | 36046673 |
| CNV | NM_015678 | NBEA | chr13 | 36124613 | 36124731 |
| CNV | NM_015678 | NBEA | chr13 | 36125066 | 36125169 |

|     |              |       |       |          |          |
|-----|--------------|-------|-------|----------|----------|
| CNV | NM_015678    | NBEA  | chr13 | 36129123 | 36129239 |
| CNV | NM_015678    | NBEA  | chr13 | 36141041 | 36141154 |
| CNV | NM_015678    | NBEA  | chr13 | 36158034 | 36158175 |
| CNV | NM_015678    | NBEA  | chr13 | 36167464 | 36167584 |
| CNV | NM_015678    | NBEA  | chr13 | 36180562 | 36180715 |
| CNV | NM_015678    | NBEA  | chr13 | 36202217 | 36202385 |
| CNV | NM_015678    | NBEA  | chr13 | 36220395 | 36220485 |
| CNV | NM_015678    | NBEA  | chr13 | 36223791 | 36223984 |
| CNV | NM_015678    | NBEA  | chr13 | 36225941 | 36226013 |
| CNV | NM_015678    | NBEA  | chr13 | 36228991 | 36229147 |
| CNV | NM_015678    | NBEA  | chr13 | 36229715 | 36229886 |
| CNV | NM_015678    | NBEA  | chr13 | 36239221 | 36239323 |
| CNV | NM_015678    | NBEA  | chr13 | 36241510 | 36241707 |
| CNV | NM_015678    | NBEA  | chr13 | 36242504 | 36242656 |
| CNV | NM_015678    | NBEA  | chr13 | 36245037 | 36246873 |
| CNV | NM_004540    | NCAM2 | chr21 | 22370632 | 22370936 |
| CNV | NM_004540    | NCAM2 | chr21 | 22652897 | 22652972 |
| CNV | NM_004540    | NCAM2 | chr21 | 22656513 | 22656720 |
| CNV | NM_004540    | NCAM2 | chr21 | 22658588 | 22658732 |
| CNV | NM_004540    | NCAM2 | chr21 | 22664423 | 22664561 |
| CNV | NM_004540    | NCAM2 | chr21 | 22696702 | 22696820 |
| CNV | NM_004540    | NCAM2 | chr21 | 22707824 | 22707985 |
| CNV | NM_004540    | NCAM2 | chr21 | 22710708 | 22710854 |
| CNV | NM_004540    | NCAM2 | chr21 | 22746182 | 22746333 |
| CNV | NM_004540    | NCAM2 | chr21 | 22782593 | 22782781 |
| CNV | NM_004540    | NCAM2 | chr21 | 22790792 | 22790889 |
| CNV | NM_004540    | NCAM2 | chr21 | 22804427 | 22804601 |
| CNV | NM_004540    | NCAM2 | chr21 | 22838926 | 22839046 |
| CNV | NM_004540    | NCAM2 | chr21 | 22840982 | 22841104 |
| CNV | NM_004540    | NCAM2 | chr21 | 22849611 | 22849792 |
| CNV | NM_004540    | NCAM2 | chr21 | 22881171 | 22881376 |
| CNV | NM_004540    | NCAM2 | chr21 | 22906857 | 22906977 |
| CNV | NM_004540    | NCAM2 | chr21 | 22910166 | 22912517 |
| SMG | NM_001242539 | NCOA6 | chr20 | 33302577 | 33303169 |
| SMG | NM_001242539 | NCOA6 | chr20 | 33315062 | 33315211 |
| SMG | NM_001242539 | NCOA6 | chr20 | 33320362 | 33320399 |
| SMG | NM_001242539 | NCOA6 | chr20 | 33324493 | 33324562 |
| SMG | NM_001242539 | NCOA6 | chr20 | 33334610 | 33334732 |
| SMG | NM_001242539 | NCOA6 | chr20 | 33337205 | 33338322 |
| SMG | NM_001242539 | NCOA6 | chr20 | 33342524 | 33342671 |
| SMG | NM_001242539 | NCOA6 | chr20 | 33345022 | 33345907 |
| SMG | NM_001242539 | NCOA6 | chr20 | 33346607 | 33346736 |
| SMG | NM_001242539 | NCOA6 | chr20 | 33356266 | 33356389 |

|     |              |       |       |          |          |
|-----|--------------|-------|-------|----------|----------|
| SMG | NM_001242539 | NCOA6 | chr20 | 33364095 | 33364251 |
| SMG | NM_001242539 | NCOA6 | chr20 | 33369923 | 33370207 |
| SMG | NM_001242539 | NCOA6 | chr20 | 33380252 | 33380366 |
| SMG | NM_001242539 | NCOA6 | chr20 | 33413274 | 33413433 |
| LIT | NM_006154    | NEDD4 | chr15 | 56119116 | 56122197 |
| LIT | NM_006154    | NEDD4 | chr15 | 56122711 | 56122784 |
| LIT | NM_006154    | NEDD4 | chr15 | 56125205 | 56125302 |
| LIT | NM_006154    | NEDD4 | chr15 | 56126235 | 56126343 |
| LIT | NM_006154    | NEDD4 | chr15 | 56126424 | 56126484 |
| LIT | NM_006154    | NEDD4 | chr15 | 56129986 | 56130047 |
| LIT | NM_006154    | NEDD4 | chr15 | 56130304 | 56130378 |
| LIT | NM_006154    | NEDD4 | chr15 | 56130706 | 56130802 |
| LIT | NM_006154    | NEDD4 | chr15 | 56132644 | 56132715 |
| LIT | NM_006154    | NEDD4 | chr15 | 56132803 | 56132925 |
| LIT | NM_006154    | NEDD4 | chr15 | 56134131 | 56134361 |
| LIT | NM_006154    | NEDD4 | chr15 | 56139166 | 56139232 |
| LIT | NM_006154    | NEDD4 | chr15 | 56140569 | 56140628 |
| LIT | NM_006154    | NEDD4 | chr15 | 56140718 | 56140773 |
| LIT | NM_006154    | NEDD4 | chr15 | 56141003 | 56141084 |
| LIT | NM_006154    | NEDD4 | chr15 | 56142739 | 56142940 |
| LIT | NM_006154    | NEDD4 | chr15 | 56144621 | 56144741 |
| LIT | NM_006154    | NEDD4 | chr15 | 56148328 | 56148394 |
| LIT | NM_006154    | NEDD4 | chr15 | 56152604 | 56152772 |
| LIT | NM_006154    | NEDD4 | chr15 | 56152858 | 56152976 |
| LIT | NM_006154    | NEDD4 | chr15 | 56155110 | 56155277 |
| LIT | NM_006154    | NEDD4 | chr15 | 56161776 | 56161879 |
| LIT | NM_006154    | NEDD4 | chr15 | 56164612 | 56164674 |
| LIT | NM_006154    | NEDD4 | chr15 | 56166155 | 56166206 |
| LIT | NM_006154    | NEDD4 | chr15 | 56216843 | 56216897 |
| LIT | NM_006154    | NEDD4 | chr15 | 56243573 | 56243612 |
| LIT | NM_006154    | NEDD4 | chr15 | 56243708 | 56243787 |
| LIT | NM_006154    | NEDD4 | chr15 | 56258670 | 56258744 |
| LIT | NM_006154    | NEDD4 | chr15 | 56285708 | 56285944 |
| SMG | NM_004713    | NEMF  | chr14 | 50250531 | 50251431 |
| SMG | NM_004713    | NEMF  | chr14 | 50251642 | 50251722 |
| SMG | NM_004713    | NEMF  | chr14 | 50251809 | 50251853 |
| SMG | NM_004713    | NEMF  | chr14 | 50251937 | 50252038 |
| SMG | NM_004713    | NEMF  | chr14 | 50253435 | 50253468 |
| SMG | NM_004713    | NEMF  | chr14 | 50255863 | 50256061 |
| SMG | NM_004713    | NEMF  | chr14 | 50256213 | 50256291 |
| SMG | NM_004713    | NEMF  | chr14 | 50262508 | 50262662 |
| SMG | NM_004713    | NEMF  | chr14 | 50266192 | 50266242 |
| SMG | NM_004713    | NEMF  | chr14 | 50266353 | 50266396 |

|     |           |      |       |          |          |
|-----|-----------|------|-------|----------|----------|
| SMG | NM_004713 | NEMF | chr14 | 50267137 | 50267414 |
| SMG | NM_004713 | NEMF | chr14 | 50269170 | 50269291 |
| SMG | NM_004713 | NEMF | chr14 | 50269386 | 50269445 |
| SMG | NM_004713 | NEMF | chr14 | 50269954 | 50270012 |
| SMG | NM_004713 | NEMF | chr14 | 50272738 | 50272851 |
| SMG | NM_004713 | NEMF | chr14 | 50280705 | 50280768 |
| SMG | NM_004713 | NEMF | chr14 | 50281471 | 50281575 |
| SMG | NM_004713 | NEMF | chr14 | 50292584 | 50292673 |
| SMG | NM_004713 | NEMF | chr14 | 50295008 | 50295072 |
| SMG | NM_004713 | NEMF | chr14 | 50295333 | 50295525 |
| SMG | NM_004713 | NEMF | chr14 | 50295771 | 50295980 |
| SMG | NM_004713 | NEMF | chr14 | 50296066 | 50296144 |
| SMG | NM_004713 | NEMF | chr14 | 50298016 | 50298079 |
| SMG | NM_004713 | NEMF | chr14 | 50298768 | 50298844 |
| SMG | NM_004713 | NEMF | chr14 | 50298924 | 50298995 |
| SMG | NM_004713 | NEMF | chr14 | 50300140 | 50300214 |
| SMG | NM_004713 | NEMF | chr14 | 50301080 | 50301167 |
| SMG | NM_004713 | NEMF | chr14 | 50304856 | 50304924 |
| SMG | NM_004713 | NEMF | chr14 | 50307435 | 50307584 |
| SMG | NM_004713 | NEMF | chr14 | 50312857 | 50312983 |
| SMG | NM_004713 | NEMF | chr14 | 50318280 | 50318383 |
| SMG | NM_004713 | NEMF | chr14 | 50318524 | 50318593 |
| SMG | NM_004713 | NEMF | chr14 | 50319412 | 50319539 |
| DRV | NM_000267 | NF1  | chr17 | 29421944 | 29422387 |
| DRV | NM_000267 | NF1  | chr17 | 29483000 | 29483144 |
| DRV | NM_000267 | NF1  | chr17 | 29486027 | 29486111 |
| DRV | NM_000267 | NF1  | chr17 | 29490203 | 29490394 |
| DRV | NM_000267 | NF1  | chr17 | 29496908 | 29497015 |
| DRV | NM_000267 | NF1  | chr17 | 29508439 | 29508507 |
| DRV | NM_000267 | NF1  | chr17 | 29508727 | 29508803 |
| DRV | NM_000267 | NF1  | chr17 | 29509525 | 29509683 |
| DRV | NM_000267 | NF1  | chr17 | 29527439 | 29527613 |
| DRV | NM_000267 | NF1  | chr17 | 29528054 | 29528177 |
| DRV | NM_000267 | NF1  | chr17 | 29528428 | 29528503 |
| DRV | NM_000267 | NF1  | chr17 | 29533257 | 29533389 |
| DRV | NM_000267 | NF1  | chr17 | 29541468 | 29541603 |
| DRV | NM_000267 | NF1  | chr17 | 29546022 | 29546136 |
| DRV | NM_000267 | NF1  | chr17 | 29548867 | 29548947 |
| DRV | NM_000267 | NF1  | chr17 | 29550461 | 29550585 |
| DRV | NM_000267 | NF1  | chr17 | 29552112 | 29552268 |
| DRV | NM_000267 | NF1  | chr17 | 29553452 | 29553702 |
| DRV | NM_000267 | NF1  | chr17 | 29554235 | 29554309 |
| DRV | NM_000267 | NF1  | chr17 | 29554540 | 29554624 |

|     |           |       |       |          |          |
|-----|-----------|-------|-------|----------|----------|
| DRV | NM_000267 | NF1   | chr17 | 29556042 | 29556483 |
| DRV | NM_000267 | NF1   | chr17 | 29556852 | 29556992 |
| DRV | NM_000267 | NF1   | chr17 | 29557277 | 29557400 |
| DRV | NM_000267 | NF1   | chr17 | 29557859 | 29557943 |
| DRV | NM_000267 | NF1   | chr17 | 29559090 | 29559207 |
| DRV | NM_000267 | NF1   | chr17 | 29559717 | 29559899 |
| DRV | NM_000267 | NF1   | chr17 | 29560019 | 29560231 |
| DRV | NM_000267 | NF1   | chr17 | 29562628 | 29562790 |
| DRV | NM_000267 | NF1   | chr17 | 29562935 | 29563039 |
| DRV | NM_000267 | NF1   | chr17 | 29576001 | 29576137 |
| DRV | NM_000267 | NF1   | chr17 | 29585361 | 29585520 |
| DRV | NM_000267 | NF1   | chr17 | 29586049 | 29586147 |
| DRV | NM_000267 | NF1   | chr17 | 29587386 | 29587533 |
| DRV | NM_000267 | NF1   | chr17 | 29588728 | 29588875 |
| DRV | NM_000267 | NF1   | chr17 | 29592246 | 29592357 |
| DRV | NM_000267 | NF1   | chr17 | 29652837 | 29653270 |
| DRV | NM_000267 | NF1   | chr17 | 29654516 | 29654857 |
| DRV | NM_000267 | NF1   | chr17 | 29657313 | 29657516 |
| DRV | NM_000267 | NF1   | chr17 | 29661855 | 29662049 |
| DRV | NM_000267 | NF1   | chr17 | 29663350 | 29663491 |
| DRV | NM_000267 | NF1   | chr17 | 29663652 | 29663932 |
| DRV | NM_000267 | NF1   | chr17 | 29664385 | 29664600 |
| DRV | NM_000267 | NF1   | chr17 | 29664836 | 29664898 |
| DRV | NM_000267 | NF1   | chr17 | 29665042 | 29665157 |
| DRV | NM_000267 | NF1   | chr17 | 29665721 | 29665823 |
| DRV | NM_000267 | NF1   | chr17 | 29667522 | 29667663 |
| DRV | NM_000267 | NF1   | chr17 | 29670026 | 29670153 |
| DRV | NM_000267 | NF1   | chr17 | 29676137 | 29676269 |
| DRV | NM_000267 | NF1   | chr17 | 29677200 | 29677336 |
| DRV | NM_000267 | NF1   | chr17 | 29679274 | 29679432 |
| DRV | NM_000267 | NF1   | chr17 | 29683477 | 29683600 |
| DRV | NM_000267 | NF1   | chr17 | 29683977 | 29684108 |
| DRV | NM_000267 | NF1   | chr17 | 29684286 | 29684387 |
| DRV | NM_000267 | NF1   | chr17 | 29685497 | 29685640 |
| DRV | NM_000267 | NF1   | chr17 | 29685986 | 29686033 |
| DRV | NM_000267 | NF1   | chr17 | 29687504 | 29687721 |
| DRV | NM_000267 | NF1   | chr17 | 29701030 | 29704695 |
| SMG | NM_021257 | NGB   | chr14 | 77731833 | 77733013 |
| SMG | NM_021257 | NGB   | chr14 | 77734808 | 77734928 |
| SMG | NM_021257 | NGB   | chr14 | 77735557 | 77735669 |
| SMG | NM_021257 | NGB   | chr14 | 77737191 | 77737655 |
| CNV | NM_015384 | NIPBL | chr5  | 36876860 | 36877280 |
| CNV | NM_015384 | NIPBL | chr5  | 36953719 | 36953862 |



|     |           |       |      |          |          |
|-----|-----------|-------|------|----------|----------|
| CNV | NM_015384 | NIPBL | chr5 | 36955573 | 36955739 |
| CNV | NM_015384 | NIPBL | chr5 | 36958205 | 36958333 |
| CNV | NM_015384 | NIPBL | chr5 | 36961585 | 36961685 |
| CNV | NM_015384 | NIPBL | chr5 | 36962224 | 36962376 |
| CNV | NM_015384 | NIPBL | chr5 | 36970977 | 36971138 |
| CNV | NM_015384 | NIPBL | chr5 | 36972046 | 36972143 |
| CNV | NM_015384 | NIPBL | chr5 | 36975877 | 36976504 |
| CNV | NM_015384 | NIPBL | chr5 | 36984777 | 36986403 |
| CNV | NM_015384 | NIPBL | chr5 | 36995723 | 36995906 |
| CNV | NM_015384 | NIPBL | chr5 | 37000474 | 37000672 |
| CNV | NM_015384 | NIPBL | chr5 | 37000918 | 37000990 |
| CNV | NM_015384 | NIPBL | chr5 | 37001090 | 37001180 |
| CNV | NM_015384 | NIPBL | chr5 | 37002763 | 37002867 |
| CNV | NM_015384 | NIPBL | chr5 | 37003362 | 37003449 |
| CNV | NM_015384 | NIPBL | chr5 | 37006458 | 37006690 |
| CNV | NM_015384 | NIPBL | chr5 | 37007424 | 37007576 |
| CNV | NM_015384 | NIPBL | chr5 | 37008109 | 37008190 |
| CNV | NM_015384 | NIPBL | chr5 | 37008724 | 37008825 |
| CNV | NM_015384 | NIPBL | chr5 | 37010188 | 37010327 |
| CNV | NM_015384 | NIPBL | chr5 | 37014784 | 37014867 |
| CNV | NM_015384 | NIPBL | chr5 | 37016139 | 37016272 |
| CNV | NM_015384 | NIPBL | chr5 | 37017120 | 37017264 |
| CNV | NM_015384 | NIPBL | chr5 | 37019412 | 37019502 |
| CNV | NM_015384 | NIPBL | chr5 | 37020560 | 37020775 |
| CNV | NM_015384 | NIPBL | chr5 | 37020876 | 37020979 |
| CNV | NM_015384 | NIPBL | chr5 | 37022152 | 37022251 |
| CNV | NM_015384 | NIPBL | chr5 | 37022345 | 37022492 |
| CNV | NM_015384 | NIPBL | chr5 | 37024686 | 37024821 |
| CNV | NM_015384 | NIPBL | chr5 | 37026330 | 37026429 |
| CNV | NM_015384 | NIPBL | chr5 | 37027460 | 37027514 |
| CNV | NM_015384 | NIPBL | chr5 | 37036480 | 37036589 |
| CNV | NM_015384 | NIPBL | chr5 | 37038703 | 37038840 |
| CNV | NM_015384 | NIPBL | chr5 | 37044448 | 37044589 |
| CNV | NM_015384 | NIPBL | chr5 | 37044737 | 37044831 |
| CNV | NM_015384 | NIPBL | chr5 | 37045544 | 37045699 |
| CNV | NM_015384 | NIPBL | chr5 | 37046210 | 37046301 |
| CNV | NM_015384 | NIPBL | chr5 | 37048603 | 37048777 |
| CNV | NM_015384 | NIPBL | chr5 | 37049212 | 37049403 |
| CNV | NM_015384 | NIPBL | chr5 | 37051880 | 37051988 |
| CNV | NM_015384 | NIPBL | chr5 | 37052467 | 37052668 |
| CNV | NM_015384 | NIPBL | chr5 | 37057287 | 37057434 |
| CNV | NM_015384 | NIPBL | chr5 | 37058992 | 37059267 |
| CNV | NM_015384 | NIPBL | chr5 | 37060945 | 37061120 |

|     |              |        |       |           |           |
|-----|--------------|--------|-------|-----------|-----------|
| CNV | NM_015384    | NIPBL  | chr5  | 37063891  | 37065921  |
| CNV | NM_173688    | NKAIN3 | chr8  | 63161500  | 63161686  |
| CNV | NM_173688    | NKAIN3 | chr8  | 63492097  | 63492235  |
| CNV | NM_173688    | NKAIN3 | chr8  | 63502272  | 63502353  |
| CNV | NM_173688    | NKAIN3 | chr8  | 63659490  | 63659688  |
| CNV | NM_173688    | NKAIN3 | chr8  | 63831011  | 63831072  |
| CNV | NM_173688    | NKAIN3 | chr8  | 63902726  | 63903628  |
| LIT | NM_001166175 | NKX2-5 | chr5  | 172659106 | 172660504 |
| LIT | NM_001166175 | NKX2-5 | chr5  | 172661752 | 172662315 |
| SMG | NM_016616    | NME8   | chr7  | 37888198  | 37888330  |
| SMG | NM_016616    | NME8   | chr7  | 37888425  | 37888658  |
| SMG | NM_016616    | NME8   | chr7  | 37889861  | 37889901  |
| SMG | NM_016616    | NME8   | chr7  | 37889979  | 37890037  |
| SMG | NM_016616    | NME8   | chr7  | 37890230  | 37890337  |
| SMG | NM_016616    | NME8   | chr7  | 37896875  | 37896947  |
| SMG | NM_016616    | NME8   | chr7  | 37901629  | 37901746  |
| SMG | NM_016616    | NME8   | chr7  | 37902997  | 37903064  |
| SMG | NM_016616    | NME8   | chr7  | 37903949  | 37904023  |
| SMG | NM_016616    | NME8   | chr7  | 37905126  | 37905219  |
| SMG | NM_016616    | NME8   | chr7  | 37907303  | 37907500  |
| SMG | NM_016616    | NME8   | chr7  | 37916433  | 37916609  |
| SMG | NM_016616    | NME8   | chr7  | 37923904  | 37924049  |
| SMG | NM_016616    | NME8   | chr7  | 37924746  | 37924854  |
| SMG | NM_016616    | NME8   | chr7  | 37927878  | 37928030  |
| SMG | NM_016616    | NME8   | chr7  | 37934067  | 37934212  |
| SMG | NM_016616    | NME8   | chr7  | 37936471  | 37936709  |
| SMG | NM_016616    | NME8   | chr7  | 37939845  | 37940002  |
| SMG | NM_022451    | NOC3L  | chr10 | 96092988  | 96094062  |
| SMG | NM_022451    | NOC3L  | chr10 | 96094390  | 96094475  |
| SMG | NM_022451    | NOC3L  | chr10 | 96097533  | 96097631  |
| SMG | NM_022451    | NOC3L  | chr10 | 96098364  | 96098493  |
| SMG | NM_022451    | NOC3L  | chr10 | 96099495  | 96099677  |
| SMG | NM_022451    | NOC3L  | chr10 | 96100032  | 96100104  |
| SMG | NM_022451    | NOC3L  | chr10 | 96100189  | 96100253  |
| SMG | NM_022451    | NOC3L  | chr10 | 96101429  | 96101502  |
| SMG | NM_022451    | NOC3L  | chr10 | 96104171  | 96104272  |
| SMG | NM_022451    | NOC3L  | chr10 | 96104609  | 96104690  |
| SMG | NM_022451    | NOC3L  | chr10 | 96106181  | 96106313  |
| SMG | NM_022451    | NOC3L  | chr10 | 96109006  | 96109135  |
| SMG | NM_022451    | NOC3L  | chr10 | 96109869  | 96110045  |
| SMG | NM_022451    | NOC3L  | chr10 | 96112066  | 96112160  |
| SMG | NM_022451    | NOC3L  | chr10 | 96112652  | 96112814  |
| SMG | NM_022451    | NOC3L  | chr10 | 96114719  | 96114850  |

|     |              |       |       |           |           |
|-----|--------------|-------|-------|-----------|-----------|
| SMG | NM_022451    | NOC3L | chr10 | 96116291  | 96116348  |
| SMG | NM_022451    | NOC3L | chr10 | 96116930  | 96117088  |
| SMG | NM_022451    | NOC3L | chr10 | 96117839  | 96117972  |
| SMG | NM_022451    | NOC3L | chr10 | 96121421  | 96121629  |
| SMG | NM_022451    | NOC3L | chr10 | 96122586  | 96122683  |
| SMG | NM_001256394 | NOL8  | chr9  | 95059639  | 95060168  |
| SMG | NM_001256394 | NOL8  | chr9  | 95060538  | 95060618  |
| SMG | NM_001256394 | NOL8  | chr9  | 95061165  | 95061236  |
| SMG | NM_001256394 | NOL8  | chr9  | 95062171  | 95062298  |
| SMG | NM_001256394 | NOL8  | chr9  | 95063832  | 95064104  |
| SMG | NM_001256394 | NOL8  | chr9  | 95068034  | 95068112  |
| SMG | NM_001256394 | NOL8  | chr9  | 95069167  | 95069306  |
| SMG | NM_001256394 | NOL8  | chr9  | 95072452  | 95072543  |
| SMG | NM_001256394 | NOL8  | chr9  | 95072834  | 95072957  |
| SMG | NM_001256394 | NOL8  | chr9  | 95073427  | 95073541  |
| SMG | NM_001256394 | NOL8  | chr9  | 95076548  | 95078418  |
| SMG | NM_001256394 | NOL8  | chr9  | 95080897  | 95080968  |
| SMG | NM_001256394 | NOL8  | chr9  | 95081502  | 95081638  |
| SMG | NM_001256394 | NOL8  | chr9  | 95083949  | 95084028  |
| SMG | NM_001256394 | NOL8  | chr9  | 95085517  | 95085633  |
| SMG | NM_001256394 | NOL8  | chr9  | 95085722  | 95085785  |
| SMG | NM_001256394 | NOL8  | chr9  | 95086304  | 95086491  |
| SMG | NM_001256394 | NOL8  | chr9  | 95087599  | 95087876  |
| LIT | NM_018958    | NPAP1 | chr15 | 24920540  | 24928593  |
| CNV | NM_001204376 | NPR3  | chr5  | 32710742  | 32710889  |
| CNV | NM_001204376 | NPR3  | chr5  | 32724803  | 32724926  |
| CNV | NM_001204376 | NPR3  | chr5  | 32738969  | 32739136  |
| CNV | NM_001204376 | NPR3  | chr5  | 32774813  | 32774949  |
| CNV | NM_001204376 | NPR3  | chr5  | 32780827  | 32780922  |
| CNV | NM_001204376 | NPR3  | chr5  | 32782998  | 32783134  |
| CNV | NM_001204376 | NPR3  | chr5  | 32784904  | 32784989  |
| CNV | NM_001204376 | NPR3  | chr5  | 32786339  | 32791830  |
| SMG | NM_001251934 | NR1H3 | chr11 | 47269850  | 47269906  |
| SMG | NM_001251934 | NR1H3 | chr11 | 47270230  | 47270415  |
| SMG | NM_001251934 | NR1H3 | chr11 | 47281341  | 47281530  |
| SMG | NM_001251934 | NR1H3 | chr11 | 47281959  | 47282226  |
| SMG | NM_001251934 | NR1H3 | chr11 | 47282791  | 47283000  |
| SMG | NM_001251934 | NR1H3 | chr11 | 47283097  | 47283277  |
| SMG | NM_001251934 | NR1H3 | chr11 | 47283469  | 47283569  |
| SMG | NM_001251934 | NR1H3 | chr11 | 47289463  | 47289577  |
| SMG | NM_001251934 | NR1H3 | chr11 | 47289811  | 47289906  |
| SMG | NM_001251934 | NR1H3 | chr11 | 47290100  | 47290584  |
| DRV | NM_002524    | NRAS  | chr1  | 115247084 | 115250671 |

|     |              |        |       |           |           |
|-----|--------------|--------|-------|-----------|-----------|
| DRV | NM_002524    | NRAS   | chr1  | 115250774 | 115250813 |
| DRV | NM_002524    | NRAS   | chr1  | 115251151 | 115251275 |
| DRV | NM_002524    | NRAS   | chr1  | 115252189 | 115252349 |
| DRV | NM_002524    | NRAS   | chr1  | 115256420 | 115256599 |
| DRV | NM_002524    | NRAS   | chr1  | 115258670 | 115258798 |
| DRV | NM_002524    | NRAS   | chr1  | 115259278 | 115259515 |
| LIT | NM_001142474 | NREP   | chr5  | 111064999 | 111066743 |
| LIT | NM_001142474 | NREP   | chr5  | 111071126 | 111071204 |
| LIT | NM_001142474 | NREP   | chr5  | 111311000 | 111311075 |
| LIT | NM_001142474 | NREP   | chr5  | 111312406 | 111312628 |
| SMG | NM_012344    | NTSR2  | chr2  | 11798303  | 11798848  |
| SMG | NM_012344    | NTSR2  | chr2  | 11800168  | 11800259  |
| SMG | NM_012344    | NTSR2  | chr2  | 11802092  | 11802366  |
| SMG | NM_012344    | NTSR2  | chr2  | 11809631  | 11810329  |
| CNV | NM_031438    | NUDT12 | chr5  | 102884555 | 102886672 |
| CNV | NM_031438    | NUDT12 | chr5  | 102887917 | 102888117 |
| CNV | NM_031438    | NUDT12 | chr5  | 102890440 | 102890554 |
| CNV | NM_031438    | NUDT12 | chr5  | 102891631 | 102891799 |
| CNV | NM_031438    | NUDT12 | chr5  | 102894579 | 102895169 |
| CNV | NM_031438    | NUDT12 | chr5  | 102895743 | 102895955 |
| CNV | NM_031438    | NUDT12 | chr5  | 102898403 | 102898490 |
| SMG | NM_020401    | NUP107 | chr12 | 69080730  | 69080853  |
| SMG | NM_020401    | NUP107 | chr12 | 69082741  | 69082833  |
| SMG | NM_020401    | NUP107 | chr12 | 69083312  | 69083399  |
| SMG | NM_020401    | NUP107 | chr12 | 69084410  | 69084526  |
| SMG | NM_020401    | NUP107 | chr12 | 69085747  | 69085892  |
| SMG | NM_020401    | NUP107 | chr12 | 69090598  | 69090702  |
| SMG | NM_020401    | NUP107 | chr12 | 69094505  | 69094633  |
| SMG | NM_020401    | NUP107 | chr12 | 69096515  | 69096564  |
| SMG | NM_020401    | NUP107 | chr12 | 69103017  | 69103089  |
| SMG | NM_020401    | NUP107 | chr12 | 69103784  | 69103873  |
| SMG | NM_020401    | NUP107 | chr12 | 69107509  | 69107588  |
| SMG | NM_020401    | NUP107 | chr12 | 69109406  | 69109520  |
| SMG | NM_020401    | NUP107 | chr12 | 69113120  | 69113211  |
| SMG | NM_020401    | NUP107 | chr12 | 69113357  | 69113434  |
| SMG | NM_020401    | NUP107 | chr12 | 69114897  | 69114957  |
| SMG | NM_020401    | NUP107 | chr12 | 69115620  | 69115766  |
| SMG | NM_020401    | NUP107 | chr12 | 69115883  | 69115932  |
| SMG | NM_020401    | NUP107 | chr12 | 69119506  | 69119576  |
| SMG | NM_020401    | NUP107 | chr12 | 69120278  | 69120397  |
| SMG | NM_020401    | NUP107 | chr12 | 69121130  | 69121169  |
| SMG | NM_020401    | NUP107 | chr12 | 69124889  | 69125040  |
| SMG | NM_020401    | NUP107 | chr12 | 69125386  | 69125499  |

|     |           |        |       |          |          |
|-----|-----------|--------|-------|----------|----------|
| SMG | NM_020401 | NUP107 | chr12 | 69126416 | 69126519 |
| SMG | NM_020401 | NUP107 | chr12 | 69127231 | 69127392 |
| SMG | NM_020401 | NUP107 | chr12 | 69128487 | 69128613 |
| SMG | NM_020401 | NUP107 | chr12 | 69129010 | 69129124 |
| SMG | NM_020401 | NUP107 | chr12 | 69135592 | 69135760 |
| SMG | NM_020401 | NUP107 | chr12 | 69136134 | 69136473 |
| CNV | NM_024923 | NUP210 | chr3  | 13357729 | 13359281 |
| CNV | NM_024923 | NUP210 | chr3  | 13360571 | 13360655 |
| CNV | NM_024923 | NUP210 | chr3  | 13360729 | 13360825 |
| CNV | NM_024923 | NUP210 | chr3  | 13361262 | 13361479 |
| CNV | NM_024923 | NUP210 | chr3  | 13363084 | 13363335 |
| CNV | NM_024923 | NUP210 | chr3  | 13363692 | 13363839 |
| CNV | NM_024923 | NUP210 | chr3  | 13364808 | 13364932 |
| CNV | NM_024923 | NUP210 | chr3  | 13367294 | 13367431 |
| CNV | NM_024923 | NUP210 | chr3  | 13368716 | 13368937 |
| CNV | NM_024923 | NUP210 | chr3  | 13370270 | 13370446 |
| CNV | NM_024923 | NUP210 | chr3  | 13371959 | 13372134 |
| CNV | NM_024923 | NUP210 | chr3  | 13373792 | 13373884 |
| CNV | NM_024923 | NUP210 | chr3  | 13376953 | 13377112 |
| CNV | NM_024923 | NUP210 | chr3  | 13378286 | 13378418 |
| CNV | NM_024923 | NUP210 | chr3  | 13379336 | 13379417 |
| CNV | NM_024923 | NUP210 | chr3  | 13381353 | 13381533 |
| CNV | NM_024923 | NUP210 | chr3  | 13381735 | 13381798 |
| CNV | NM_024923 | NUP210 | chr3  | 13383247 | 13383383 |
| CNV | NM_024923 | NUP210 | chr3  | 13383495 | 13383623 |
| CNV | NM_024923 | NUP210 | chr3  | 13384674 | 13384803 |
| CNV | NM_024923 | NUP210 | chr3  | 13393378 | 13393480 |
| CNV | NM_024923 | NUP210 | chr3  | 13393579 | 13393684 |
| CNV | NM_024923 | NUP210 | chr3  | 13395053 | 13395160 |
| CNV | NM_024923 | NUP210 | chr3  | 13395414 | 13395607 |
| CNV | NM_024923 | NUP210 | chr3  | 13399721 | 13399895 |
| CNV | NM_024923 | NUP210 | chr3  | 13401769 | 13401991 |
| CNV | NM_024923 | NUP210 | chr3  | 13407445 | 13407591 |
| CNV | NM_024923 | NUP210 | chr3  | 13413333 | 13413532 |
| CNV | NM_024923 | NUP210 | chr3  | 13415217 | 13415373 |
| CNV | NM_024923 | NUP210 | chr3  | 13417003 | 13417141 |
| CNV | NM_024923 | NUP210 | chr3  | 13417790 | 13417931 |
| CNV | NM_024923 | NUP210 | chr3  | 13418955 | 13419062 |
| CNV | NM_024923 | NUP210 | chr3  | 13420411 | 13420480 |
| CNV | NM_024923 | NUP210 | chr3  | 13421062 | 13421221 |
| CNV | NM_024923 | NUP210 | chr3  | 13427774 | 13427907 |
| CNV | NM_024923 | NUP210 | chr3  | 13429802 | 13429953 |
| CNV | NM_024923 | NUP210 | chr3  | 13432710 | 13432807 |

|     |              |        |      |           |           |
|-----|--------------|--------|------|-----------|-----------|
| CNV | NM_024923    | NUP210 | chr3 | 13438856  | 13438988  |
| CNV | NM_024923    | NUP210 | chr3 | 13441224  | 13441361  |
| CNV | NM_024923    | NUP210 | chr3 | 13461559  | 13461819  |
| SMG | NM_017561    | NUTM2F | chr9 | 97080477  | 97081532  |
| SMG | NM_017561    | NUTM2F | chr9 | 97081894  | 97082011  |
| SMG | NM_017561    | NUTM2F | chr9 | 97082489  | 97082875  |
| SMG | NM_017561    | NUTM2F | chr9 | 97083374  | 97083514  |
| SMG | NM_017561    | NUTM2F | chr9 | 97084482  | 97084611  |
| SMG | NM_017561    | NUTM2F | chr9 | 97087519  | 97088216  |
| SMG | NM_017561    | NUTM2F | chr9 | 97090889  | 97090926  |
| SMG | NM_020864    | NYAP2  | chr2 | 226265601 | 226265759 |
| SMG | NM_020864    | NYAP2  | chr2 | 226273579 | 226273817 |
| SMG | NM_020864    | NYAP2  | chr2 | 226378086 | 226378388 |
| SMG | NM_020864    | NYAP2  | chr2 | 226446656 | 226447751 |
| SMG | NM_020864    | NYAP2  | chr2 | 226491632 | 226491842 |
| SMG | NM_020864    | NYAP2  | chr2 | 226516147 | 226518734 |
| LIT | NM_001098623 | OBSCN  | chr1 | 228395830 | 228395886 |
| LIT | NM_001098623 | OBSCN  | chr1 | 228399466 | 228400472 |
| LIT | NM_001098623 | OBSCN  | chr1 | 228401141 | 228401411 |
| LIT | NM_001098623 | OBSCN  | chr1 | 228401874 | 228402135 |
| LIT | NM_001098623 | OBSCN  | chr1 | 228402490 | 228402799 |
| LIT | NM_001098623 | OBSCN  | chr1 | 228403263 | 228403530 |
| LIT | NM_001098623 | OBSCN  | chr1 | 228404121 | 228404403 |
| LIT | NM_001098623 | OBSCN  | chr1 | 228404713 | 228404989 |
| LIT | NM_001098623 | OBSCN  | chr1 | 228412159 | 228412435 |
| LIT | NM_001098623 | OBSCN  | chr1 | 228430883 | 228431159 |
| LIT | NM_001098623 | OBSCN  | chr1 | 228431996 | 228432272 |
| LIT | NM_001098623 | OBSCN  | chr1 | 228433113 | 228433389 |
| LIT | NM_001098623 | OBSCN  | chr1 | 228434228 | 228434504 |
| LIT | NM_001098623 | OBSCN  | chr1 | 228437665 | 228437941 |
| LIT | NM_001098623 | OBSCN  | chr1 | 228444351 | 228444627 |
| LIT | NM_001098623 | OBSCN  | chr1 | 228451816 | 228452092 |
| LIT | NM_001098623 | OBSCN  | chr1 | 228456230 | 228456506 |
| LIT | NM_001098623 | OBSCN  | chr1 | 228461470 | 228461749 |
| LIT | NM_001098623 | OBSCN  | chr1 | 228461878 | 228462145 |
| LIT | NM_001098623 | OBSCN  | chr1 | 228462272 | 228462542 |
| LIT | NM_001098623 | OBSCN  | chr1 | 228463460 | 228463727 |
| LIT | NM_001098623 | OBSCN  | chr1 | 228464150 | 228464417 |
| LIT | NM_001098623 | OBSCN  | chr1 | 228464630 | 228464743 |
| LIT | NM_001098623 | OBSCN  | chr1 | 228464860 | 228465014 |
| LIT | NM_001098623 | OBSCN  | chr1 | 228465454 | 228465559 |
| LIT | NM_001098623 | OBSCN  | chr1 | 228466389 | 228466656 |
| LIT | NM_001098623 | OBSCN  | chr1 | 228466875 | 228467145 |

|     |              |       |      |           |           |
|-----|--------------|-------|------|-----------|-----------|
| LIT | NM_001098623 | OBSCN | chr1 | 228467521 | 228467788 |
| LIT | NM_001098623 | OBSCN | chr1 | 228467879 | 228468146 |
| LIT | NM_001098623 | OBSCN | chr1 | 228468230 | 228468497 |
| LIT | NM_001098623 | OBSCN | chr1 | 228469633 | 228469906 |
| LIT | NM_001098623 | OBSCN | chr1 | 228470718 | 228470985 |
| LIT | NM_001098623 | OBSCN | chr1 | 228471203 | 228471470 |
| LIT | NM_001098623 | OBSCN | chr1 | 228473778 | 228474051 |
| LIT | NM_001098623 | OBSCN | chr1 | 228474473 | 228474740 |
| LIT | NM_001098623 | OBSCN | chr1 | 228475394 | 228475661 |
| LIT | NM_001098623 | OBSCN | chr1 | 228475761 | 228476025 |
| LIT | NM_001098623 | OBSCN | chr1 | 228476325 | 228476589 |
| LIT | NM_001098623 | OBSCN | chr1 | 228479598 | 228479862 |
| LIT | NM_001098623 | OBSCN | chr1 | 228480223 | 228480487 |
| LIT | NM_001098623 | OBSCN | chr1 | 228481053 | 228481317 |
| LIT | NM_001098623 | OBSCN | chr1 | 228481852 | 228482116 |
| LIT | NM_001098623 | OBSCN | chr1 | 228482480 | 228482744 |
| LIT | NM_001098623 | OBSCN | chr1 | 228494072 | 228494339 |
| LIT | NM_001098623 | OBSCN | chr1 | 228494601 | 228494868 |
| LIT | NM_001098623 | OBSCN | chr1 | 228494959 | 228495232 |
| LIT | NM_001098623 | OBSCN | chr1 | 228495811 | 228496084 |
| LIT | NM_001098623 | OBSCN | chr1 | 228496799 | 228496996 |
| LIT | NM_001098623 | OBSCN | chr1 | 228497184 | 228497260 |
| LIT | NM_001098623 | OBSCN | chr1 | 228503547 | 228503820 |
| LIT | NM_001098623 | OBSCN | chr1 | 228504409 | 228504685 |
| LIT | NM_001098623 | OBSCN | chr1 | 228505164 | 228505452 |
| LIT | NM_001098623 | OBSCN | chr1 | 228505592 | 228505874 |
| LIT | NM_001098623 | OBSCN | chr1 | 228506584 | 228506955 |
| LIT | NM_001098623 | OBSCN | chr1 | 228509044 | 228509915 |
| LIT | NM_001098623 | OBSCN | chr1 | 228511028 | 228511307 |
| LIT | NM_001098623 | OBSCN | chr1 | 228520560 | 228520639 |
| LIT | NM_001098623 | OBSCN | chr1 | 228520899 | 228521024 |
| LIT | NM_001098623 | OBSCN | chr1 | 228521283 | 228521481 |
| LIT | NM_001098623 | OBSCN | chr1 | 228522212 | 228522245 |
| LIT | NM_001098623 | OBSCN | chr1 | 228522515 | 228522614 |
| LIT | NM_001098623 | OBSCN | chr1 | 228522780 | 228522999 |
| LIT | NM_001098623 | OBSCN | chr1 | 228523491 | 228523552 |
| LIT | NM_001098623 | OBSCN | chr1 | 228523900 | 228523971 |
| LIT | NM_001098623 | OBSCN | chr1 | 228524704 | 228524827 |
| LIT | NM_001098623 | OBSCN | chr1 | 228524944 | 228525084 |
| LIT | NM_001098623 | OBSCN | chr1 | 228525644 | 228525845 |
| LIT | NM_001098623 | OBSCN | chr1 | 228525990 | 228526073 |
| LIT | NM_001098623 | OBSCN | chr1 | 228526553 | 228526727 |
| LIT | NM_001098623 | OBSCN | chr1 | 228527645 | 228527802 |

|     |              |        |       |           |           |
|-----|--------------|--------|-------|-----------|-----------|
| LIT | NM_001098623 | OBSCN  | chr1  | 228528206 | 228528323 |
| LIT | NM_001098623 | OBSCN  | chr1  | 228528424 | 228528589 |
| LIT | NM_001098623 | OBSCN  | chr1  | 228528795 | 228528954 |
| LIT | NM_001098623 | OBSCN  | chr1  | 228529137 | 228529315 |
| LIT | NM_001098623 | OBSCN  | chr1  | 228529819 | 228529933 |
| LIT | NM_001098623 | OBSCN  | chr1  | 228537590 | 228537758 |
| LIT | NM_001098623 | OBSCN  | chr1  | 228538541 | 228538644 |
| LIT | NM_001098623 | OBSCN  | chr1  | 228539021 | 228539151 |
| LIT | NM_001098623 | OBSCN  | chr1  | 228540651 | 228540763 |
| LIT | NM_001098623 | OBSCN  | chr1  | 228550276 | 228550456 |
| LIT | NM_001098623 | OBSCN  | chr1  | 228552681 | 228552778 |
| LIT | NM_001098623 | OBSCN  | chr1  | 228553136 | 228553261 |
| LIT | NM_001098623 | OBSCN  | chr1  | 228553774 | 228553887 |
| LIT | NM_001098623 | OBSCN  | chr1  | 228554100 | 228554269 |
| LIT | NM_001098623 | OBSCN  | chr1  | 228554508 | 228554590 |
| LIT | NM_001098623 | OBSCN  | chr1  | 228554675 | 228554876 |
| LIT | NM_001098623 | OBSCN  | chr1  | 228555586 | 228555647 |
| LIT | NM_001098623 | OBSCN  | chr1  | 228556039 | 228556117 |
| LIT | NM_001098623 | OBSCN  | chr1  | 228556422 | 228556595 |
| LIT | NM_001098623 | OBSCN  | chr1  | 228556836 | 228556863 |
| LIT | NM_001098623 | OBSCN  | chr1  | 228557642 | 228557795 |
| LIT | NM_001098623 | OBSCN  | chr1  | 228557893 | 228557939 |
| LIT | NM_001098623 | OBSCN  | chr1  | 228558379 | 228558457 |
| LIT | NM_001098623 | OBSCN  | chr1  | 228558723 | 228560782 |
| LIT | NM_001098623 | OBSCN  | chr1  | 228561632 | 228561713 |
| LIT | NM_001098623 | OBSCN  | chr1  | 228562014 | 228562125 |
| LIT | NM_001098623 | OBSCN  | chr1  | 228562285 | 228562453 |
| LIT | NM_001098623 | OBSCN  | chr1  | 228563402 | 228563525 |
| LIT | NM_001098623 | OBSCN  | chr1  | 228563708 | 228563879 |
| LIT | NM_001098623 | OBSCN  | chr1  | 228564493 | 228564575 |
| LIT | NM_001098623 | OBSCN  | chr1  | 228564752 | 228564992 |
| LIT | NM_001098623 | OBSCN  | chr1  | 228565189 | 228565413 |
| LIT | NM_001098623 | OBSCN  | chr1  | 228565631 | 228565707 |
| LIT | NM_001098623 | OBSCN  | chr1  | 228565971 | 228566121 |
| LIT | NM_001098623 | OBSCN  | chr1  | 228566318 | 228566575 |
| CNV | NM_006418    | OLFM4  | chr13 | 53602875  | 53603175  |
| CNV | NM_006418    | OLFM4  | chr13 | 53608482  | 53608635  |
| CNV | NM_006418    | OLFM4  | chr13 | 53616044  | 53616257  |
| CNV | NM_006418    | OLFM4  | chr13 | 53617239  | 53617399  |
| CNV | NM_006418    | OLFM4  | chr13 | 53624103  | 53626196  |
| SMG | NM_198474    | OLFML1 | chr11 | 7506599   | 7507235   |
| SMG | NM_198474    | OLFML1 | chr11 | 7509357   | 7509646   |
| SMG | NM_198474    | OLFML1 | chr11 | 7530628   | 7532606   |



|     |              |        |               |           |           |
|-----|--------------|--------|---------------|-----------|-----------|
| SMG | NM_030883    | OR2H1  | chr6_apd_hap1 | 729706    | 729823    |
| SMG | NM_030883    | OR2H1  | chr6_apd_hap1 | 731658    | 731709    |
| SMG | NM_030883    | OR2H1  | chr6_apd_hap1 | 732749    | 735577    |
| SMG | NM_017504    | OR2M4  | chr1          | 248402230 | 248403166 |
| SMG | NM_001004063 | OR4K1  | chr14         | 20403766  | 20404842  |
| SMG | NM_001004760 | OR51V1 | chr11         | 5220964   | 5221930   |
| SMG | NM_001005179 | OR56A4 | chr11         | 6023280   | 6024378   |
| SMG | NM_001005218 | OR5B21 | chr11         | 58274648  | 58275578  |
| SMG | NM_003696    | OR6A2  | chr11         | 6815755   | 6817139   |
| SMG | NM_001005185 | OR6N1  | chr1          | 158735533 | 158736472 |
| SMG | NM_198944    | OR7C1  | chr19         | 14909985  | 14910948  |
| SMG | NM_001005205 | OR8J1  | chr11         | 56127690  | 56128764  |
| CNV | NM_003999    | OSMR   | chr5          | 38846100  | 38846489  |
| CNV | NM_003999    | OSMR   | chr5          | 38869133  | 38869219  |
| CNV | NM_003999    | OSMR   | chr5          | 38876302  | 38876475  |
| CNV | NM_003999    | OSMR   | chr5          | 38881694  | 38881866  |
| CNV | NM_003999    | OSMR   | chr5          | 38883928  | 38884213  |
| CNV | NM_003999    | OSMR   | chr5          | 38885450  | 38885586  |
| CNV | NM_003999    | OSMR   | chr5          | 38886140  | 38886292  |
| CNV | NM_003999    | OSMR   | chr5          | 38903983  | 38904126  |
| CNV | NM_003999    | OSMR   | chr5          | 38904454  | 38904605  |
| CNV | NM_003999    | OSMR   | chr5          | 38917647  | 38917724  |
| CNV | NM_003999    | OSMR   | chr5          | 38918941  | 38919164  |
| CNV | NM_003999    | OSMR   | chr5          | 38921716  | 38921896  |
| CNV | NM_003999    | OSMR   | chr5          | 38923251  | 38923356  |
| CNV | NM_003999    | OSMR   | chr5          | 38924523  | 38924697  |
| CNV | NM_003999    | OSMR   | chr5          | 38925305  | 38925473  |
| CNV | NM_003999    | OSMR   | chr5          | 38931984  | 38932066  |
| CNV | NM_003999    | OSMR   | chr5          | 38932564  | 38932637  |
| CNV | NM_003999    | OSMR   | chr5          | 38932973  | 38935743  |
| SMG | NM_001286745 | OTUD6B | chr8          | 92082423  | 92082694  |
| SMG | NM_001286745 | OTUD6B | chr8          | 92083365  | 92083517  |
| SMG | NM_001286745 | OTUD6B | chr8          | 92086058  | 92086139  |
| SMG | NM_001286745 | OTUD6B | chr8          | 92088819  | 92088959  |
| SMG | NM_001286745 | OTUD6B | chr8          | 92090583  | 92090896  |
| SMG | NM_001286745 | OTUD6B | chr8          | 92092896  | 92092958  |
| SMG | NM_001286745 | OTUD6B | chr8          | 92096235  | 92096342  |
| SMG | NM_001286745 | OTUD6B | chr8          | 92097011  | 92099323  |
| LIT | NM_002562    | P2RX7  | chr12         | 121570630 | 121570898 |
| LIT | NM_002562    | P2RX7  | chr12         | 121592587 | 121592756 |
| LIT | NM_002562    | P2RX7  | chr12         | 121593881 | 121593950 |
| LIT | NM_002562    | P2RX7  | chr12         | 121598704 | 121598777 |
| LIT | NM_002562    | P2RX7  | chr12         | 121600226 | 121600323 |

|     |              |        |       |           |           |
|-----|--------------|--------|-------|-----------|-----------|
| LIT | NM_002562    | P2RX7  | chr12 | 121603159 | 121603240 |
| LIT | NM_002562    | P2RX7  | chr12 | 121603860 | 121603990 |
| LIT | NM_002562    | P2RX7  | chr12 | 121605290 | 121605427 |
| LIT | NM_002562    | P2RX7  | chr12 | 121613190 | 121613281 |
| LIT | NM_002562    | P2RX7  | chr12 | 121614949 | 121615015 |
| LIT | NM_002562    | P2RX7  | chr12 | 121615099 | 121615249 |
| LIT | NM_002562    | P2RX7  | chr12 | 121618156 | 121618258 |
| LIT | NM_002562    | P2RX7  | chr12 | 121622107 | 121624354 |
| SMG | NM_014499    | P2RY10 | chrX  | 78200828  | 78200992  |
| SMG | NM_014499    | P2RY10 | chrX  | 78203311  | 78203360  |
| SMG | NM_014499    | P2RY10 | chrX  | 78207689  | 78207832  |
| SMG | NM_014499    | P2RY10 | chrX  | 78216004  | 78217438  |
| LIT | NM_001081455 | P2RY14 | chr3  | 150929904 | 150932128 |
| LIT | NM_001081455 | P2RY14 | chr3  | 150937322 | 150937430 |
| LIT | NM_001081455 | P2RY14 | chr3  | 150966652 | 150966998 |
| LIT | NM_006191    | PA2G4  | chr12 | 56498102  | 56498609  |
| LIT | NM_006191    | PA2G4  | chr12 | 56500371  | 56500500  |
| LIT | NM_006191    | PA2G4  | chr12 | 56500773  | 56500879  |
| LIT | NM_006191    | PA2G4  | chr12 | 56500970  | 56501040  |
| LIT | NM_006191    | PA2G4  | chr12 | 56501304  | 56501397  |
| LIT | NM_006191    | PA2G4  | chr12 | 56503013  | 56503077  |
| LIT | NM_006191    | PA2G4  | chr12 | 56503640  | 56503719  |
| LIT | NM_006191    | PA2G4  | chr12 | 56504182  | 56504261  |
| LIT | NM_006191    | PA2G4  | chr12 | 56504342  | 56504476  |
| LIT | NM_006191    | PA2G4  | chr12 | 56504747  | 56504842  |
| LIT | NM_006191    | PA2G4  | chr12 | 56504965  | 56505093  |
| LIT | NM_006191    | PA2G4  | chr12 | 56505259  | 56505313  |
| LIT | NM_006191    | PA2G4  | chr12 | 56506606  | 56507694  |
| SMG | NM_207339    | PAGE2  | chrX  | 55115496  | 55115536  |
| SMG | NM_207339    | PAGE2  | chrX  | 55116445  | 55116537  |
| SMG | NM_207339    | PAGE2  | chrX  | 55116934  | 55117043  |
| SMG | NM_207339    | PAGE2  | chrX  | 55117764  | 55117890  |
| SMG | NM_207339    | PAGE2  | chrX  | 55119147  | 55119260  |
| CNV | NM_000919    | PAM    | chr5  | 102201526 | 102201988 |
| CNV | NM_000919    | PAM    | chr5  | 102202976 | 102203097 |
| CNV | NM_000919    | PAM    | chr5  | 102237059 | 102237117 |
| CNV | NM_000919    | PAM    | chr5  | 102249637 | 102249725 |
| CNV | NM_000919    | PAM    | chr5  | 102260660 | 102260746 |
| CNV | NM_000919    | PAM    | chr5  | 102262288 | 102262372 |
| CNV | NM_000919    | PAM    | chr5  | 102282540 | 102282589 |
| CNV | NM_000919    | PAM    | chr5  | 102284081 | 102284149 |
| CNV | NM_000919    | PAM    | chr5  | 102285240 | 102285321 |
| CNV | NM_000919    | PAM    | chr5  | 102285605 | 102285682 |

|     |              |        |       |           |           |
|-----|--------------|--------|-------|-----------|-----------|
| CNV | NM_000919    | PAM    | chr5  | 102286420 | 102286524 |
| CNV | NM_000919    | PAM    | chr5  | 102295578 | 102295763 |
| CNV | NM_000919    | PAM    | chr5  | 102296861 | 102296933 |
| CNV | NM_000919    | PAM    | chr5  | 102309819 | 102310140 |
| CNV | NM_000919    | PAM    | chr5  | 102325975 | 102326105 |
| CNV | NM_000919    | PAM    | chr5  | 102338736 | 102338853 |
| CNV | NM_000919    | PAM    | chr5  | 102340857 | 102340930 |
| CNV | NM_000919    | PAM    | chr5  | 102342504 | 102342715 |
| CNV | NM_000919    | PAM    | chr5  | 102343160 | 102343361 |
| CNV | NM_000919    | PAM    | chr5  | 102345454 | 102345570 |
| CNV | NM_000919    | PAM    | chr5  | 102353037 | 102353137 |
| CNV | NM_000919    | PAM    | chr5  | 102355493 | 102355547 |
| CNV | NM_000919    | PAM    | chr5  | 102360834 | 102361038 |
| CNV | NM_000919    | PAM    | chr5  | 102363885 | 102363942 |
| CNV | NM_000919    | PAM    | chr5  | 102364590 | 102366808 |
| CNV | NM_004562    | PARK2  | chr6  | 161768589 | 161771243 |
| CNV | NM_004562    | PARK2  | chr6  | 161781119 | 161781237 |
| CNV | NM_004562    | PARK2  | chr6  | 161807825 | 161807909 |
| CNV | NM_004562    | PARK2  | chr6  | 161969885 | 161970035 |
| CNV | NM_004562    | PARK2  | chr6  | 161990386 | 161990448 |
| CNV | NM_004562    | PARK2  | chr6  | 162206803 | 162206940 |
| CNV | NM_004562    | PARK2  | chr6  | 162394333 | 162394449 |
| CNV | NM_004562    | PARK2  | chr6  | 162475122 | 162475206 |
| CNV | NM_004562    | PARK2  | chr6  | 162622162 | 162622284 |
| CNV | NM_004562    | PARK2  | chr6  | 162683556 | 162683797 |
| CNV | NM_004562    | PARK2  | chr6  | 162864341 | 162864505 |
| CNV | NM_004562    | PARK2  | chr6  | 163148693 | 163148834 |
| CNV | NM_001286521 | PARP11 | chr12 | 3918026   | 3921605   |
| CNV | NM_001286521 | PARP11 | chr12 | 3923202   | 3923354   |
| CNV | NM_001286521 | PARP11 | chr12 | 3931038   | 3931169   |
| CNV | NM_001286521 | PARP11 | chr12 | 3931250   | 3931323   |
| CNV | NM_001286521 | PARP11 | chr12 | 3935323   | 3935399   |
| CNV | NM_001286521 | PARP11 | chr12 | 3939055   | 3939184   |
| CNV | NM_001286521 | PARP11 | chr12 | 3982377   | 3982614   |
| SMG | NM_001146103 | PARP9  | chr3  | 122246759 | 122247590 |
| SMG | NM_001146103 | PARP9  | chr3  | 122255014 | 122255189 |
| SMG | NM_001146103 | PARP9  | chr3  | 122255780 | 122255920 |
| SMG | NM_001146103 | PARP9  | chr3  | 122259318 | 122259699 |
| SMG | NM_001146103 | PARP9  | chr3  | 122264278 | 122264336 |
| SMG | NM_001146103 | PARP9  | chr3  | 122269430 | 122269649 |
| SMG | NM_001146103 | PARP9  | chr3  | 122271264 | 122271486 |
| SMG | NM_001146103 | PARP9  | chr3  | 122274132 | 122274968 |
| SMG | NM_001146103 | PARP9  | chr3  | 122277280 | 122277314 |

|     |              |         |       |           |           |
|-----|--------------|---------|-------|-----------|-----------|
| SMG | NM_001146103 | PARP9   | chr3  | 122278452 | 122278556 |
| SMG | NM_001146103 | PARP9   | chr3  | 122283285 | 122283523 |
| SMG | NM_006196    | PCBP1   | chr2  | 70314584  | 70316334  |
| CNV | NM_001040429 | PCDH17  | chr13 | 58205788  | 58209245  |
| CNV | NM_001040429 | PCDH17  | chr13 | 58240601  | 58240660  |
| CNV | NM_001040429 | PCDH17  | chr13 | 58240794  | 58240967  |
| CNV | NM_001040429 | PCDH17  | chr13 | 58298745  | 58303065  |
| SMG | NM_001173523 | PCDH7   | chr4  | 30722036  | 30726218  |
| SMG | NM_001173523 | PCDH7   | chr4  | 30921774  | 30921991  |
| SMG | NM_001173523 | PCDH7   | chr4  | 31144094  | 31148423  |
| CNV | NM_203487    | PCDH9   | chr13 | 66876965  | 66879160  |
| CNV | NM_203487    | PCDH9   | chr13 | 67205341  | 67205543  |
| CNV | NM_203487    | PCDH9   | chr13 | 67477635  | 67477737  |
| CNV | NM_203487    | PCDH9   | chr13 | 67799536  | 67802707  |
| CNV | NM_203487    | PCDH9   | chr13 | 67803911  | 67804468  |
| SMG | NM_018901    | PCDHA10 | chr5  | 140235467 | 140238021 |
| SMG | NM_018901    | PCDHA10 | chr5  | 140358533 | 140358592 |
| SMG | NM_018901    | PCDHA10 | chr5  | 140362059 | 140362148 |
| SMG | NM_018901    | PCDHA10 | chr5  | 140389211 | 140391929 |
| SMG | NM_018898    | PCDHAC1 | chr5  | 140306301 | 140308910 |
| SMG | NM_018898    | PCDHAC1 | chr5  | 140358533 | 140358592 |
| SMG | NM_018898    | PCDHAC1 | chr5  | 140362059 | 140362148 |
| SMG | NM_018898    | PCDHAC1 | chr5  | 140389211 | 140391929 |
| CNV | NM_001165899 | PDE4D   | chr5  | 58264865  | 58270907  |
| CNV | NM_001165899 | PDE4D   | chr5  | 58271483  | 58271666  |
| CNV | NM_001165899 | PDE4D   | chr5  | 58272176  | 58272299  |
| CNV | NM_001165899 | PDE4D   | chr5  | 58273017  | 58273172  |
| CNV | NM_001165899 | PDE4D   | chr5  | 58284319  | 58284419  |
| CNV | NM_001165899 | PDE4D   | chr5  | 58285581  | 58285746  |
| CNV | NM_001165899 | PDE4D   | chr5  | 58286630  | 58286729  |
| CNV | NM_001165899 | PDE4D   | chr5  | 58287658  | 58287831  |
| CNV | NM_001165899 | PDE4D   | chr5  | 58289198  | 58289292  |
| CNV | NM_001165899 | PDE4D   | chr5  | 58334685  | 58334798  |
| CNV | NM_001165899 | PDE4D   | chr5  | 58476420  | 58476470  |
| CNV | NM_001165899 | PDE4D   | chr5  | 58481014  | 58481088  |
| CNV | NM_001165899 | PDE4D   | chr5  | 58489325  | 58489362  |
| CNV | NM_001165899 | PDE4D   | chr5  | 58511602  | 58511794  |
| CNV | NM_001165899 | PDE4D   | chr5  | 59284314  | 59284544  |
| CNV | NM_001165899 | PDE4D   | chr5  | 59481383  | 59481514  |
| CNV | NM_001165899 | PDE4D   | chr5  | 59783768  | 59783925  |
| CNV | NM_001242318 | PDE7A   | chr8  | 66626568  | 66631730  |
| CNV | NM_001242318 | PDE7A   | chr8  | 66635775  | 66635856  |
| CNV | NM_001242318 | PDE7A   | chr8  | 66636489  | 66636586  |

|     |              |          |       |          |          |
|-----|--------------|----------|-------|----------|----------|
| CNV | NM_001242318 | PDE7A    | chr8  | 66637011 | 66637156 |
| CNV | NM_001242318 | PDE7A    | chr8  | 66639109 | 66639201 |
| CNV | NM_001242318 | PDE7A    | chr8  | 66639404 | 66639536 |
| CNV | NM_001242318 | PDE7A    | chr8  | 66647028 | 66647129 |
| CNV | NM_001242318 | PDE7A    | chr8  | 66651736 | 66651832 |
| CNV | NM_001242318 | PDE7A    | chr8  | 66657641 | 66657705 |
| CNV | NM_001242318 | PDE7A    | chr8  | 66659886 | 66660038 |
| CNV | NM_001242318 | PDE7A    | chr8  | 66691954 | 66692038 |
| CNV | NM_001242318 | PDE7A    | chr8  | 66695017 | 66695078 |
| CNV | NM_001242318 | PDE7A    | chr8  | 66753605 | 66753969 |
| CNV | NR_047484    | PDX1-AS1 | chr13 | 28403895 | 28404420 |
| CNV | NR_047484    | PDX1-AS1 | chr13 | 28407580 | 28408287 |
| CNV | NR_047484    | PDX1-AS1 | chr13 | 28422144 | 28422673 |
| CNV | NR_047484    | PDX1-AS1 | chr13 | 28495300 | 28495541 |
| CNV | NM_178140    | PDZD2    | chr5  | 31799030 | 31799831 |
| CNV | NM_178140    | PDZD2    | chr5  | 31983260 | 31983762 |
| CNV | NM_178140    | PDZD2    | chr5  | 31995681 | 31995824 |
| CNV | NM_178140    | PDZD2    | chr5  | 32000244 | 32000377 |
| CNV | NM_178140    | PDZD2    | chr5  | 32010435 | 32010588 |
| CNV | NM_178140    | PDZD2    | chr5  | 32037336 | 32037448 |
| CNV | NM_178140    | PDZD2    | chr5  | 32048644 | 32048790 |
| CNV | NM_178140    | PDZD2    | chr5  | 32052716 | 32052836 |
| CNV | NM_178140    | PDZD2    | chr5  | 32053874 | 32053989 |
| CNV | NM_178140    | PDZD2    | chr5  | 32057760 | 32057834 |
| CNV | NM_178140    | PDZD2    | chr5  | 32057983 | 32058209 |
| CNV | NM_178140    | PDZD2    | chr5  | 32059344 | 32059462 |
| CNV | NM_178140    | PDZD2    | chr5  | 32061107 | 32061240 |
| CNV | NM_178140    | PDZD2    | chr5  | 32069674 | 32069756 |
| CNV | NM_178140    | PDZD2    | chr5  | 32071489 | 32071524 |
| CNV | NM_178140    | PDZD2    | chr5  | 32072266 | 32072423 |
| CNV | NM_178140    | PDZD2    | chr5  | 32073937 | 32074749 |
| CNV | NM_178140    | PDZD2    | chr5  | 32077567 | 32077712 |
| CNV | NM_178140    | PDZD2    | chr5  | 32087236 | 32091281 |
| CNV | NM_178140    | PDZD2    | chr5  | 32093012 | 32093130 |
| CNV | NM_178140    | PDZD2    | chr5  | 32097384 | 32097486 |
| CNV | NM_178140    | PDZD2    | chr5  | 32098469 | 32098740 |
| CNV | NM_178140    | PDZD2    | chr5  | 32101210 | 32101345 |
| CNV | NM_178140    | PDZD2    | chr5  | 32108074 | 32111038 |
| SMG | NM_000442    | PECAM1   | chr17 | 62396776 | 62401205 |
| SMG | NM_000442    | PECAM1   | chr17 | 62407059 | 62407083 |
| CNV | NM_000285    | PEPD     | chr19 | 33877854 | 33878387 |
| CNV | NM_000285    | PEPD     | chr19 | 33878795 | 33878987 |
| CNV | NM_000285    | PEPD     | chr19 | 33882200 | 33882385 |

|     |           |      |       |           |           |
|-----|-----------|------|-------|-----------|-----------|
| CNV | NM_000285 | PEPD | chr19 | 33892626  | 33892775  |
| CNV | NM_000285 | PEPD | chr19 | 33902577  | 33902655  |
| CNV | NM_000285 | PEPD | chr19 | 33904480  | 33904549  |
| CNV | NM_000285 | PEPD | chr19 | 33953900  | 33953947  |
| CNV | NM_000285 | PEPD | chr19 | 33954892  | 33954968  |
| CNV | NM_000285 | PEPD | chr19 | 33968951  | 33968996  |
| CNV | NM_000285 | PEPD | chr19 | 33980901  | 33980963  |
| CNV | NM_000285 | PEPD | chr19 | 33984195  | 33984243  |
| CNV | NM_000285 | PEPD | chr19 | 33991843  | 33991907  |
| CNV | NM_000285 | PEPD | chr19 | 34001933  | 34002061  |
| CNV | NM_000285 | PEPD | chr19 | 34003498  | 34003682  |
| CNV | NM_000285 | PEPD | chr19 | 34012649  | 34012799  |
| LIT | NM_002616 | PER1 | chr17 | 8043787   | 8044658   |
| LIT | NM_002616 | PER1 | chr17 | 8045122   | 8045273   |
| LIT | NM_002616 | PER1 | chr17 | 8045586   | 8045776   |
| LIT | NM_002616 | PER1 | chr17 | 8045966   | 8046153   |
| LIT | NM_002616 | PER1 | chr17 | 8046583   | 8047194   |
| LIT | NM_002616 | PER1 | chr17 | 8048068   | 8048311   |
| LIT | NM_002616 | PER1 | chr17 | 8049275   | 8049455   |
| LIT | NM_002616 | PER1 | chr17 | 8049689   | 8049820   |
| LIT | NM_002616 | PER1 | chr17 | 8049911   | 8050083   |
| LIT | NM_002616 | PER1 | chr17 | 8050214   | 8050320   |
| LIT | NM_002616 | PER1 | chr17 | 8050567   | 8050699   |
| LIT | NM_002616 | PER1 | chr17 | 8050787   | 8050896   |
| LIT | NM_002616 | PER1 | chr17 | 8050991   | 8051145   |
| LIT | NM_002616 | PER1 | chr17 | 8051314   | 8051421   |
| LIT | NM_002616 | PER1 | chr17 | 8051498   | 8051577   |
| LIT | NM_002616 | PER1 | chr17 | 8051961   | 8052104   |
| LIT | NM_002616 | PER1 | chr17 | 8052576   | 8052628   |
| LIT | NM_002616 | PER1 | chr17 | 8052779   | 8052981   |
| LIT | NM_002616 | PER1 | chr17 | 8053072   | 8053194   |
| LIT | NM_002616 | PER1 | chr17 | 8053288   | 8053443   |
| LIT | NM_002616 | PER1 | chr17 | 8053536   | 8053635   |
| LIT | NM_002616 | PER1 | chr17 | 8053749   | 8054163   |
| LIT | NM_002616 | PER1 | chr17 | 8055654   | 8055753   |
| LIT | NM_022817 | PER2 | chr2  | 239152678 | 239155165 |
| LIT | NM_022817 | PER2 | chr2  | 239157702 | 239157853 |
| LIT | NM_022817 | PER2 | chr2  | 239159191 | 239159384 |
| LIT | NM_022817 | PER2 | chr2  | 239160239 | 239160402 |
| LIT | NM_022817 | PER2 | chr2  | 239161552 | 239162343 |
| LIT | NM_022817 | PER2 | chr2  | 239164297 | 239164552 |
| LIT | NM_022817 | PER2 | chr2  | 239165562 | 239165727 |
| LIT | NM_022817 | PER2 | chr2  | 239166916 | 239167041 |

|     |           |       |      |           |           |
|-----|-----------|-------|------|-----------|-----------|
| LIT | NM_022817 | PER2  | chr2 | 239167137 | 239167285 |
| LIT | NM_022817 | PER2  | chr2 | 239168609 | 239168694 |
| LIT | NM_022817 | PER2  | chr2 | 239169468 | 239169594 |
| LIT | NM_022817 | PER2  | chr2 | 239170369 | 239170478 |
| LIT | NM_022817 | PER2  | chr2 | 239170831 | 239170985 |
| LIT | NM_022817 | PER2  | chr2 | 239171592 | 239171699 |
| LIT | NM_022817 | PER2  | chr2 | 239174152 | 239174231 |
| LIT | NM_022817 | PER2  | chr2 | 239176696 | 239176839 |
| LIT | NM_022817 | PER2  | chr2 | 239177563 | 239177615 |
| LIT | NM_022817 | PER2  | chr2 | 239179952 | 239180154 |
| LIT | NM_022817 | PER2  | chr2 | 239181710 | 239181832 |
| LIT | NM_022817 | PER2  | chr2 | 239184383 | 239184538 |
| LIT | NM_022817 | PER2  | chr2 | 239185771 | 239185834 |
| LIT | NM_022817 | PER2  | chr2 | 239186347 | 239186596 |
| LIT | NM_022817 | PER2  | chr2 | 239196989 | 239197207 |
| SMG | NM_002622 | PFDN1 | chr5 | 139624634 | 139625642 |
| SMG | NM_002622 | PFDN1 | chr5 | 139661033 | 139661118 |
| SMG | NM_002622 | PFDN1 | chr5 | 139680000 | 139680167 |
| SMG | NM_002622 | PFDN1 | chr5 | 139682625 | 139682689 |
| LIT | NM_017934 | PHIP  | chr6 | 79644135  | 79651047  |
| LIT | NM_017934 | PHIP  | chr6 | 79655016  | 79655214  |
| LIT | NM_017934 | PHIP  | chr6 | 79655717  | 79655977  |
| LIT | NM_017934 | PHIP  | chr6 | 79656427  | 79656591  |
| LIT | NM_017934 | PHIP  | chr6 | 79657339  | 79657492  |
| LIT | NM_017934 | PHIP  | chr6 | 79664530  | 79664680  |
| LIT | NM_017934 | PHIP  | chr6 | 79664948  | 79664999  |
| LIT | NM_017934 | PHIP  | chr6 | 79665329  | 79665399  |
| LIT | NM_017934 | PHIP  | chr6 | 79668191  | 79668317  |
| LIT | NM_017934 | PHIP  | chr6 | 79671406  | 79671527  |
| LIT | NM_017934 | PHIP  | chr6 | 79672813  | 79672969  |
| LIT | NM_017934 | PHIP  | chr6 | 79675419  | 79675481  |
| LIT | NM_017934 | PHIP  | chr6 | 79675661  | 79675773  |
| LIT | NM_017934 | PHIP  | chr6 | 79679551  | 79679634  |
| LIT | NM_017934 | PHIP  | chr6 | 79679765  | 79679890  |
| LIT | NM_017934 | PHIP  | chr6 | 79680497  | 79680605  |
| LIT | NM_017934 | PHIP  | chr6 | 79688308  | 79688428  |
| LIT | NM_017934 | PHIP  | chr6 | 79692602  | 79692834  |
| LIT | NM_017934 | PHIP  | chr6 | 79695068  | 79695145  |
| LIT | NM_017934 | PHIP  | chr6 | 79697925  | 79698066  |
| LIT | NM_017934 | PHIP  | chr6 | 79700584  | 79700702  |
| LIT | NM_017934 | PHIP  | chr6 | 79707130  | 79707314  |
| LIT | NM_017934 | PHIP  | chr6 | 79707970  | 79708108  |
| LIT | NM_017934 | PHIP  | chr6 | 79711615  | 79711841  |

|     |           |        |       |           |           |
|-----|-----------|--------|-------|-----------|-----------|
| LIT | NM_017934 | PHIP   | chr6  | 79713446  | 79713575  |
| LIT | NM_017934 | PHIP   | chr6  | 79724798  | 79724933  |
| LIT | NM_017934 | PHIP   | chr6  | 79725346  | 79725500  |
| LIT | NM_017934 | PHIP   | chr6  | 79726260  | 79726359  |
| LIT | NM_017934 | PHIP   | chr6  | 79727062  | 79727103  |
| LIT | NM_017934 | PHIP   | chr6  | 79727199  | 79727300  |
| LIT | NM_017934 | PHIP   | chr6  | 79728805  | 79728876  |
| LIT | NM_017934 | PHIP   | chr6  | 79735235  | 79735336  |
| LIT | NM_017934 | PHIP   | chr6  | 79735659  | 79735881  |
| LIT | NM_017934 | PHIP   | chr6  | 79752559  | 79752720  |
| LIT | NM_017934 | PHIP   | chr6  | 79770194  | 79770293  |
| LIT | NM_017934 | PHIP   | chr6  | 79770384  | 79770535  |
| LIT | NM_017934 | PHIP   | chr6  | 79787164  | 79787224  |
| LIT | NM_017934 | PHIP   | chr6  | 79787416  | 79787446  |
| LIT | NM_017934 | PHIP   | chr6  | 79787571  | 79787630  |
| LIT | NM_017934 | PHIP   | chr6  | 79787745  | 79788011  |
| CNV | NM_006346 | PIBF1  | chr13 | 73356229  | 73356487  |
| CNV | NM_006346 | PIBF1  | chr13 | 73357560  | 73357859  |
| CNV | NM_006346 | PIBF1  | chr13 | 73366584  | 73366685  |
| CNV | NM_006346 | PIBF1  | chr13 | 73369496  | 73369695  |
| CNV | NM_006346 | PIBF1  | chr13 | 73372044  | 73372164  |
| CNV | NM_006346 | PIBF1  | chr13 | 73395986  | 73396120  |
| CNV | NM_006346 | PIBF1  | chr13 | 73401147  | 73401256  |
| CNV | NM_006346 | PIBF1  | chr13 | 73401870  | 73402052  |
| CNV | NM_006346 | PIBF1  | chr13 | 73409380  | 73409506  |
| CNV | NM_006346 | PIBF1  | chr13 | 73428194  | 73428293  |
| CNV | NM_006346 | PIBF1  | chr13 | 73467921  | 73468087  |
| CNV | NM_006346 | PIBF1  | chr13 | 73482668  | 73482819  |
| CNV | NM_006346 | PIBF1  | chr13 | 73491213  | 73491304  |
| CNV | NM_006346 | PIBF1  | chr13 | 73505302  | 73505405  |
| CNV | NM_006346 | PIBF1  | chr13 | 73539411  | 73539542  |
| CNV | NM_006346 | PIBF1  | chr13 | 73547728  | 73547813  |
| CNV | NM_006346 | PIBF1  | chr13 | 73572959  | 73573133  |
| CNV | NM_006346 | PIBF1  | chr13 | 73590006  | 73590591  |
| DRV | NM_006218 | PIK3CA | chr3  | 178866310 | 178866391 |
| DRV | NM_006218 | PIK3CA | chr3  | 178916537 | 178916965 |
| DRV | NM_006218 | PIK3CA | chr3  | 178917477 | 178917687 |
| DRV | NM_006218 | PIK3CA | chr3  | 178919077 | 178919328 |
| DRV | NM_006218 | PIK3CA | chr3  | 178921331 | 178921577 |
| DRV | NM_006218 | PIK3CA | chr3  | 178922290 | 178922376 |
| DRV | NM_006218 | PIK3CA | chr3  | 178927382 | 178927488 |
| DRV | NM_006218 | PIK3CA | chr3  | 178927973 | 178928126 |
| DRV | NM_006218 | PIK3CA | chr3  | 178928218 | 178928353 |



|     |              |        |      |           |           |
|-----|--------------|--------|------|-----------|-----------|
| DRV | NM_006218    | PIK3CA | chr3 | 178935997 | 178936122 |
| DRV | NM_006218    | PIK3CA | chr3 | 178936983 | 178937065 |
| DRV | NM_006218    | PIK3CA | chr3 | 178937358 | 178937523 |
| DRV | NM_006218    | PIK3CA | chr3 | 178937736 | 178937840 |
| DRV | NM_006218    | PIK3CA | chr3 | 178938773 | 178938945 |
| DRV | NM_006218    | PIK3CA | chr3 | 178941868 | 178941975 |
| DRV | NM_006218    | PIK3CA | chr3 | 178942487 | 178942609 |
| DRV | NM_006218    | PIK3CA | chr3 | 178943749 | 178943828 |
| DRV | NM_006218    | PIK3CA | chr3 | 178947059 | 178947230 |
| DRV | NM_006218    | PIK3CA | chr3 | 178947791 | 178947909 |
| DRV | NM_006218    | PIK3CA | chr3 | 178948012 | 178948164 |
| DRV | NM_006218    | PIK3CA | chr3 | 178951881 | 178952497 |
| DRV | NM_181523    | PIK3R1 | chr5 | 67511583  | 67511777  |
| DRV | NM_181523    | PIK3R1 | chr5 | 67522117  | 67522837  |
| DRV | NM_181523    | PIK3R1 | chr5 | 67569217  | 67569310  |
| DRV | NM_181523    | PIK3R1 | chr5 | 67569766  | 67569841  |
| DRV | NM_181523    | PIK3R1 | chr5 | 67575429  | 67575561  |
| DRV | NM_181523    | PIK3R1 | chr5 | 67576355  | 67576557  |
| DRV | NM_181523    | PIK3R1 | chr5 | 67576754  | 67576834  |
| DRV | NM_181523    | PIK3R1 | chr5 | 67588086  | 67588189  |
| DRV | NM_181523    | PIK3R1 | chr5 | 67588928  | 67589027  |
| DRV | NM_181523    | PIK3R1 | chr5 | 67589130  | 67589311  |
| DRV | NM_181523    | PIK3R1 | chr5 | 67589536  | 67589662  |
| DRV | NM_181523    | PIK3R1 | chr5 | 67590363  | 67590506  |
| DRV | NM_181523    | PIK3R1 | chr5 | 67590975  | 67591152  |
| DRV | NM_181523    | PIK3R1 | chr5 | 67591247  | 67591316  |
| DRV | NM_181523    | PIK3R1 | chr5 | 67591998  | 67592169  |
| DRV | NM_181523    | PIK3R1 | chr5 | 67593239  | 67597649  |
| LIT | NM_001032396 | PJA1   | chrX | 68380580  | 68382983  |
| LIT | NM_001032396 | PJA1   | chrX | 68385214  | 68385365  |
| LIT | NM_138694    | PKHD1  | chr6 | 51480144  | 51484318  |
| LIT | NM_138694    | PKHD1  | chr6 | 51491794  | 51491914  |
| LIT | NM_138694    | PKHD1  | chr6 | 51497362  | 51497521  |
| LIT | NM_138694    | PKHD1  | chr6 | 51503646  | 51503754  |
| LIT | NM_138694    | PKHD1  | chr6 | 51512828  | 51512916  |
| LIT | NM_138694    | PKHD1  | chr6 | 51513882  | 51514018  |
| LIT | NM_138694    | PKHD1  | chr6 | 51523749  | 51524767  |
| LIT | NM_138694    | PKHD1  | chr6 | 51609182  | 51609340  |
| LIT | NM_138694    | PKHD1  | chr6 | 51611518  | 51611687  |
| LIT | NM_138694    | PKHD1  | chr6 | 51612584  | 51613463  |
| LIT | NM_138694    | PKHD1  | chr6 | 51617998  | 51618151  |
| LIT | NM_138694    | PKHD1  | chr6 | 51619581  | 51619736  |
| LIT | NM_138694    | PKHD1  | chr6 | 51637499  | 51637587  |

|     |           |       |      |          |          |
|-----|-----------|-------|------|----------|----------|
| LIT | NM_138694 | PKHD1 | chr6 | 51640605 | 51640719 |
| LIT | NM_138694 | PKHD1 | chr6 | 51656033 | 51656171 |
| LIT | NM_138694 | PKHD1 | chr6 | 51695658 | 51695787 |
| LIT | NM_138694 | PKHD1 | chr6 | 51701201 | 51701267 |
| LIT | NM_138694 | PKHD1 | chr6 | 51712572 | 51712768 |
| LIT | NM_138694 | PKHD1 | chr6 | 51720690 | 51720868 |
| LIT | NM_138694 | PKHD1 | chr6 | 51732660 | 51732907 |
| LIT | NM_138694 | PKHD1 | chr6 | 51735301 | 51735437 |
| LIT | NM_138694 | PKHD1 | chr6 | 51747890 | 51748025 |
| LIT | NM_138694 | PKHD1 | chr6 | 51750664 | 51750770 |
| LIT | NM_138694 | PKHD1 | chr6 | 51751930 | 51752043 |
| LIT | NM_138694 | PKHD1 | chr6 | 51768394 | 51768525 |
| LIT | NM_138694 | PKHD1 | chr6 | 51768783 | 51768840 |
| LIT | NM_138694 | PKHD1 | chr6 | 51771012 | 51771138 |
| LIT | NM_138694 | PKHD1 | chr6 | 51774080 | 51774272 |
| LIT | NM_138694 | PKHD1 | chr6 | 51776596 | 51776754 |
| LIT | NM_138694 | PKHD1 | chr6 | 51777163 | 51777374 |
| LIT | NM_138694 | PKHD1 | chr6 | 51798907 | 51799120 |
| LIT | NM_138694 | PKHD1 | chr6 | 51824667 | 51824824 |
| LIT | NM_138694 | PKHD1 | chr6 | 51875106 | 51875257 |
| LIT | NM_138694 | PKHD1 | chr6 | 51882207 | 51882427 |
| LIT | NM_138694 | PKHD1 | chr6 | 51887598 | 51887742 |
| LIT | NM_138694 | PKHD1 | chr6 | 51889371 | 51890979 |
| LIT | NM_138694 | PKHD1 | chr6 | 51892626 | 51892694 |
| LIT | NM_138694 | PKHD1 | chr6 | 51892953 | 51893149 |
| LIT | NM_138694 | PKHD1 | chr6 | 51897827 | 51897963 |
| LIT | NM_138694 | PKHD1 | chr6 | 51900388 | 51900519 |
| LIT | NM_138694 | PKHD1 | chr6 | 51907656 | 51907932 |
| LIT | NM_138694 | PKHD1 | chr6 | 51908422 | 51908528 |
| LIT | NM_138694 | PKHD1 | chr6 | 51909763 | 51909886 |
| LIT | NM_138694 | PKHD1 | chr6 | 51910801 | 51910986 |
| LIT | NM_138694 | PKHD1 | chr6 | 51913289 | 51913417 |
| LIT | NM_138694 | PKHD1 | chr6 | 51914954 | 51915093 |
| LIT | NM_138694 | PKHD1 | chr6 | 51917873 | 51918049 |
| LIT | NM_138694 | PKHD1 | chr6 | 51918835 | 51918963 |
| LIT | NM_138694 | PKHD1 | chr6 | 51920384 | 51920527 |
| LIT | NM_138694 | PKHD1 | chr6 | 51921495 | 51921586 |
| LIT | NM_138694 | PKHD1 | chr6 | 51921687 | 51921777 |
| LIT | NM_138694 | PKHD1 | chr6 | 51923120 | 51923399 |
| LIT | NM_138694 | PKHD1 | chr6 | 51924725 | 51924840 |
| LIT | NM_138694 | PKHD1 | chr6 | 51927316 | 51927458 |
| LIT | NM_138694 | PKHD1 | chr6 | 51929752 | 51929848 |
| LIT | NM_138694 | PKHD1 | chr6 | 51930773 | 51930875 |

|     |              |        |       |           |           |
|-----|--------------|--------|-------|-----------|-----------|
| LIT | NM_138694    | PKHD1  | chr6  | 51934254  | 51934325  |
| LIT | NM_138694    | PKHD1  | chr6  | 51935203  | 51935243  |
| LIT | NM_138694    | PKHD1  | chr6  | 51935803  | 51935868  |
| LIT | NM_138694    | PKHD1  | chr6  | 51936912  | 51936987  |
| LIT | NM_138694    | PKHD1  | chr6  | 51938260  | 51938339  |
| LIT | NM_138694    | PKHD1  | chr6  | 51941073  | 51941131  |
| LIT | NM_138694    | PKHD1  | chr6  | 51944697  | 51944806  |
| LIT | NM_138694    | PKHD1  | chr6  | 51947189  | 51947340  |
| LIT | NM_138694    | PKHD1  | chr6  | 51947975  | 51948053  |
| LIT | NM_138694    | PKHD1  | chr6  | 51949679  | 51949815  |
| LIT | NM_138694    | PKHD1  | chr6  | 51952231  | 51952423  |
| LIT | NM_001286258 | PKNOX1 | chr21 | 44394619  | 44394774  |
| LIT | NM_001286258 | PKNOX1 | chr21 | 44424435  | 44424542  |
| LIT | NM_001286258 | PKNOX1 | chr21 | 44427600  | 44427728  |
| LIT | NM_001286258 | PKNOX1 | chr21 | 44433177  | 44433348  |
| LIT | NM_001286258 | PKNOX1 | chr21 | 44437017  | 44437117  |
| LIT | NM_001286258 | PKNOX1 | chr21 | 44438242  | 44438340  |
| LIT | NM_001286258 | PKNOX1 | chr21 | 44441412  | 44441541  |
| LIT | NM_001286258 | PKNOX1 | chr21 | 44444980  | 44445057  |
| LIT | NM_001286258 | PKNOX1 | chr21 | 44448811  | 44448984  |
| LIT | NM_001286258 | PKNOX1 | chr21 | 44449999  | 44454041  |
| CNV | NM_001005476 | PKP4   | chr2  | 159313475 | 159313730 |
| CNV | NM_001005476 | PKP4   | chr2  | 159389691 | 159389828 |
| CNV | NM_001005476 | PKP4   | chr2  | 159433782 | 159433895 |
| CNV | NM_001005476 | PKP4   | chr2  | 159459581 | 159459616 |
| CNV | NM_001005476 | PKP4   | chr2  | 159477501 | 159477633 |
| CNV | NM_001005476 | PKP4   | chr2  | 159477742 | 159477933 |
| CNV | NM_001005476 | PKP4   | chr2  | 159481389 | 159481939 |
| CNV | NM_001005476 | PKP4   | chr2  | 159488264 | 159488453 |
| CNV | NM_001005476 | PKP4   | chr2  | 159490581 | 159490801 |
| CNV | NM_001005476 | PKP4   | chr2  | 159497138 | 159497271 |
| CNV | NM_001005476 | PKP4   | chr2  | 159498997 | 159499211 |
| CNV | NM_001005476 | PKP4   | chr2  | 159514642 | 159514826 |
| CNV | NM_001005476 | PKP4   | chr2  | 159517844 | 159517962 |
| CNV | NM_001005476 | PKP4   | chr2  | 159519408 | 159519600 |
| CNV | NM_001005476 | PKP4   | chr2  | 159519783 | 159519957 |
| CNV | NM_001005476 | PKP4   | chr2  | 159522924 | 159523075 |
| CNV | NM_001005476 | PKP4   | chr2  | 159526231 | 159526427 |
| CNV | NM_001005476 | PKP4   | chr2  | 159530188 | 159530273 |
| CNV | NM_001005476 | PKP4   | chr2  | 159530394 | 159530512 |
| CNV | NM_001005476 | PKP4   | chr2  | 159535092 | 159535166 |
| CNV | NM_001005476 | PKP4   | chr2  | 159536940 | 159537940 |
| CNV | NM_001144382 | PLCL2  | chr3  | 16926451  | 16926539  |

|     |              |        |       |          |          |
|-----|--------------|--------|-------|----------|----------|
| CNV | NM_001144382 | PLCL2  | chr3  | 16926540 | 16926548 |
| CNV | NM_001144382 | PLCL2  | chr3  | 16926562 | 16926865 |
| CNV | NM_001144382 | PLCL2  | chr3  | 17051165 | 17053652 |
| CNV | NM_001144382 | PLCL2  | chr3  | 17056199 | 17056403 |
| CNV | NM_001144382 | PLCL2  | chr3  | 17084365 | 17084441 |
| CNV | NM_001144382 | PLCL2  | chr3  | 17109447 | 17109557 |
| CNV | NM_001144382 | PLCL2  | chr3  | 17131224 | 17132098 |
| SMG | NM_002665    | PLGLB2 | chr2  | 88047605 | 88047721 |
| SMG | NM_002665    | PLGLB2 | chr2  | 88051765 | 88051901 |
| SMG | NM_002665    | PLGLB2 | chr2  | 88053046 | 88053153 |
| SMG | NM_002665    | PLGLB2 | chr2  | 88056338 | 88058994 |
| LIT | NM_000535    | PMS2   | chr7  | 6012869  | 6013173  |
| LIT | NM_000535    | PMS2   | chr7  | 6017218  | 6017388  |
| LIT | NM_000535    | PMS2   | chr7  | 6018226  | 6018327  |
| LIT | NM_000535    | PMS2   | chr7  | 6022454  | 6022622  |
| LIT | NM_000535    | PMS2   | chr7  | 6026389  | 6027251  |
| LIT | NM_000535    | PMS2   | chr7  | 6029430  | 6029586  |
| LIT | NM_000535    | PMS2   | chr7  | 6031603  | 6031688  |
| LIT | NM_000535    | PMS2   | chr7  | 6035164  | 6035264  |
| LIT | NM_000535    | PMS2   | chr7  | 6036956  | 6037054  |
| LIT | NM_000535    | PMS2   | chr7  | 6038738  | 6038906  |
| LIT | NM_000535    | PMS2   | chr7  | 6042083  | 6042267  |
| LIT | NM_000535    | PMS2   | chr7  | 6043320  | 6043423  |
| LIT | NM_000535    | PMS2   | chr7  | 6043602  | 6043689  |
| LIT | NM_000535    | PMS2   | chr7  | 6045522  | 6045662  |
| LIT | NM_000535    | PMS2   | chr7  | 6048627  | 6048737  |
| SMG | NM_007195    | POLI   | chr18 | 51795848 | 51796031 |
| SMG | NM_007195    | POLI   | chr18 | 51797729 | 51797855 |
| SMG | NM_007195    | POLI   | chr18 | 51800295 | 51800460 |
| SMG | NM_007195    | POLI   | chr18 | 51804072 | 51804225 |
| SMG | NM_007195    | POLI   | chr18 | 51807036 | 51807273 |
| SMG | NM_007195    | POLI   | chr18 | 51809206 | 51809385 |
| SMG | NM_007195    | POLI   | chr18 | 51810291 | 51810383 |
| SMG | NM_007195    | POLI   | chr18 | 51813650 | 51813781 |
| SMG | NM_007195    | POLI   | chr18 | 51818202 | 51818408 |
| SMG | NM_007195    | POLI   | chr18 | 51820018 | 51824604 |
| SMG | NM_000938    | POLR2B | chr4  | 57845108 | 57845170 |
| SMG | NM_000938    | POLR2B | chr4  | 57852519 | 57852592 |
| SMG | NM_000938    | POLR2B | chr4  | 57856913 | 57857064 |
| SMG | NM_000938    | POLR2B | chr4  | 57860569 | 57860682 |
| SMG | NM_000938    | POLR2B | chr4  | 57860812 | 57861032 |
| SMG | NM_000938    | POLR2B | chr4  | 57861416 | 57861575 |
| SMG | NM_000938    | POLR2B | chr4  | 57865782 | 57865947 |

|     |              |        |       |          |          |
|-----|--------------|--------|-------|----------|----------|
| SMG | NM_000938    | POLR2B | chr4  | 57871411 | 57871608 |
| SMG | NM_000938    | POLR2B | chr4  | 57871765 | 57871885 |
| SMG | NM_000938    | POLR2B | chr4  | 57872981 | 57873168 |
| SMG | NM_000938    | POLR2B | chr4  | 57876526 | 57876670 |
| SMG | NM_000938    | POLR2B | chr4  | 57876913 | 57877053 |
| SMG | NM_000938    | POLR2B | chr4  | 57877154 | 57877266 |
| SMG | NM_000938    | POLR2B | chr4  | 57881667 | 57881822 |
| SMG | NM_000938    | POLR2B | chr4  | 57883208 | 57883407 |
| SMG | NM_000938    | POLR2B | chr4  | 57883725 | 57883894 |
| SMG | NM_000938    | POLR2B | chr4  | 57887064 | 57887161 |
| SMG | NM_000938    | POLR2B | chr4  | 57888317 | 57888412 |
| SMG | NM_000938    | POLR2B | chr4  | 57889495 | 57889746 |
| SMG | NM_000938    | POLR2B | chr4  | 57889827 | 57889917 |
| SMG | NM_000938    | POLR2B | chr4  | 57890170 | 57890278 |
| SMG | NM_000938    | POLR2B | chr4  | 57891051 | 57891165 |
| SMG | NM_000938    | POLR2B | chr4  | 57891542 | 57891703 |
| SMG | NM_000938    | POLR2B | chr4  | 57896369 | 57896565 |
| SMG | NM_000938    | POLR2B | chr4  | 57897064 | 57897334 |
| CNV | NM_001002920 | POTEA  | chr8  | 43147584 | 43147926 |
| CNV | NM_001002920 | POTEA  | chr8  | 43152162 | 43152277 |
| CNV | NM_001002920 | POTEA  | chr8  | 43152428 | 43152602 |
| CNV | NM_001002920 | POTEA  | chr8  | 43155660 | 43155767 |
| CNV | NM_001002920 | POTEA  | chr8  | 43159841 | 43159912 |
| CNV | NM_001002920 | POTEA  | chr8  | 43171033 | 43171104 |
| CNV | NM_001002920 | POTEA  | chr8  | 43172496 | 43172541 |
| CNV | NM_001002920 | POTEA  | chr8  | 43173598 | 43173765 |
| CNV | NM_001002920 | POTEA  | chr8  | 43197021 | 43197052 |
| CNV | NM_001002920 | POTEA  | chr8  | 43197329 | 43197471 |
| CNV | NM_001002920 | POTEA  | chr8  | 43211901 | 43212115 |
| CNV | NM_001002920 | POTEA  | chr8  | 43216185 | 43216309 |
| CNV | NM_001002920 | POTEA  | chr8  | 43218093 | 43218328 |
| CNV | NM_207355    | POTEB  | chr15 | 22051852 | 22052084 |
| CNV | NM_207355    | POTEB  | chr15 | 22053722 | 22053846 |
| CNV | NM_207355    | POTEB  | chr15 | 22062315 | 22062482 |
| CNV | NM_207355    | POTEB  | chr15 | 22063527 | 22063572 |
| CNV | NM_207355    | POTEB  | chr15 | 22064975 | 22065046 |
| CNV | NM_207355    | POTEB  | chr15 | 22070539 | 22070610 |
| CNV | NM_207355    | POTEB  | chr15 | 22073120 | 22073258 |
| CNV | NM_207355    | POTEB  | chr15 | 22074595 | 22074702 |
| CNV | NM_207355    | POTEB  | chr15 | 22077530 | 22077704 |
| CNV | NM_207355    | POTEB  | chr15 | 22077863 | 22077978 |
| CNV | NM_207355    | POTEB  | chr15 | 22082360 | 22083137 |
| CNV | NM_174981    | POTED  | chr21 | 14982497 | 14983070 |

|     |              |         |       |           |           |
|-----|--------------|---------|-------|-----------|-----------|
| CNV | NM_174981    | POTED   | chr21 | 14987443  | 14987558  |
| CNV | NM_174981    | POTED   | chr21 | 14987717  | 14987891  |
| CNV | NM_174981    | POTED   | chr21 | 14990669  | 14990776  |
| CNV | NM_174981    | POTED   | chr21 | 14992478  | 14992616  |
| CNV | NM_174981    | POTED   | chr21 | 14995125  | 14995196  |
| CNV | NM_174981    | POTED   | chr21 | 15000702  | 15000773  |
| CNV | NM_174981    | POTED   | chr21 | 15002176  | 15002221  |
| CNV | NM_174981    | POTED   | chr21 | 15003261  | 15003428  |
| CNV | NM_174981    | POTED   | chr21 | 15011835  | 15011959  |
| CNV | NM_174981    | POTED   | chr21 | 15013665  | 15013906  |
| CNV | NM_005037    | PPARG   | chr3  | 12329348  | 12329519  |
| CNV | NM_005037    | PPARG   | chr3  | 12421202  | 12421430  |
| CNV | NM_005037    | PPARG   | chr3  | 12422820  | 12422990  |
| CNV | NM_005037    | PPARG   | chr3  | 12434112  | 12434251  |
| CNV | NM_005037    | PPARG   | chr3  | 12447380  | 12447580  |
| CNV | NM_005037    | PPARG   | chr3  | 12458202  | 12458653  |
| CNV | NM_005037    | PPARG   | chr3  | 12475396  | 12475855  |
| CNV | NM_001276277 | PPIP5K2 | chr5  | 102455957 | 102456192 |
| CNV | NM_001276277 | PPIP5K2 | chr5  | 102465009 | 102465407 |
| CNV | NM_001276277 | PPIP5K2 | chr5  | 102469156 | 102469352 |
| CNV | NM_001276277 | PPIP5K2 | chr5  | 102472435 | 102472526 |
| CNV | NM_001276277 | PPIP5K2 | chr5  | 102474087 | 102474173 |
| CNV | NM_001276277 | PPIP5K2 | chr5  | 102482230 | 102482385 |
| CNV | NM_001276277 | PPIP5K2 | chr5  | 102483634 | 102483736 |
| CNV | NM_001276277 | PPIP5K2 | chr5  | 102484855 | 102485017 |
| CNV | NM_001276277 | PPIP5K2 | chr5  | 102486956 | 102487078 |
| CNV | NM_001276277 | PPIP5K2 | chr5  | 102488351 | 102488453 |
| CNV | NM_001276277 | PPIP5K2 | chr5  | 102489551 | 102489638 |
| CNV | NM_001276277 | PPIP5K2 | chr5  | 102490373 | 102490449 |
| CNV | NM_001276277 | PPIP5K2 | chr5  | 102490537 | 102490647 |
| CNV | NM_001276277 | PPIP5K2 | chr5  | 102491612 | 102491698 |
| CNV | NM_001276277 | PPIP5K2 | chr5  | 102493891 | 102494017 |
| CNV | NM_001276277 | PPIP5K2 | chr5  | 102494155 | 102494277 |
| CNV | NM_001276277 | PPIP5K2 | chr5  | 102494849 | 102495032 |
| CNV | NM_001276277 | PPIP5K2 | chr5  | 102502882 | 102503024 |
| CNV | NM_001276277 | PPIP5K2 | chr5  | 102503775 | 102503999 |
| CNV | NM_001276277 | PPIP5K2 | chr5  | 102508858 | 102508986 |
| CNV | NM_001276277 | PPIP5K2 | chr5  | 102509561 | 102509676 |
| CNV | NM_001276277 | PPIP5K2 | chr5  | 102513367 | 102513475 |
| CNV | NM_001276277 | PPIP5K2 | chr5  | 102513564 | 102513681 |
| CNV | NM_001276277 | PPIP5K2 | chr5  | 102515721 | 102515889 |
| CNV | NM_001276277 | PPIP5K2 | chr5  | 102518934 | 102519108 |
| CNV | NM_001276277 | PPIP5K2 | chr5  | 102520372 | 102520445 |

|     |              |          |       |           |           |
|-----|--------------|----------|-------|-----------|-----------|
| CNV | NM_001276277 | PPIP5K2  | chr5  | 102522020 | 102522140 |
| CNV | NM_001276277 | PPIP5K2  | chr5  | 102523014 | 102523077 |
| CNV | NM_001276277 | PPIP5K2  | chr5  | 102526542 | 102526683 |
| CNV | NM_001276277 | PPIP5K2  | chr5  | 102530600 | 102530726 |
| CNV | NM_001276277 | PPIP5K2  | chr5  | 102537222 | 102539224 |
| SMG | NM_003620    | PPM1D    | chr17 | 58677543  | 58678247  |
| SMG | NM_003620    | PPM1D    | chr17 | 58700881  | 58701110  |
| SMG | NM_003620    | PPM1D    | chr17 | 58711213  | 58711338  |
| SMG | NM_003620    | PPM1D    | chr17 | 58725252  | 58725443  |
| SMG | NM_003620    | PPM1D    | chr17 | 58733959  | 58734202  |
| SMG | NM_003620    | PPM1D    | chr17 | 58740355  | 58743640  |
| SMG | NM_001172735 | PPP1R16B | chr20 | 37434347  | 37434435  |
| SMG | NM_001172735 | PPP1R16B | chr20 | 37464467  | 37464818  |
| SMG | NM_001172735 | PPP1R16B | chr20 | 37518237  | 37518308  |
| SMG | NM_001172735 | PPP1R16B | chr20 | 37524207  | 37524353  |
| SMG | NM_001172735 | PPP1R16B | chr20 | 37529223  | 37529327  |
| SMG | NM_001172735 | PPP1R16B | chr20 | 37531310  | 37531435  |
| SMG | NM_001172735 | PPP1R16B | chr20 | 37535621  | 37535697  |
| SMG | NM_001172735 | PPP1R16B | chr20 | 37536448  | 37536578  |
| SMG | NM_001172735 | PPP1R16B | chr20 | 37536670  | 37536836  |
| SMG | NM_001172735 | PPP1R16B | chr20 | 37546799  | 37551667  |
| SMG | NM_172365    | PPP1R36  | chr14 | 65016619  | 65016784  |
| SMG | NM_172365    | PPP1R36  | chr14 | 65017638  | 65017703  |
| SMG | NM_172365    | PPP1R36  | chr14 | 65019531  | 65019579  |
| SMG | NM_172365    | PPP1R36  | chr14 | 65031468  | 65031555  |
| SMG | NM_172365    | PPP1R36  | chr14 | 65032074  | 65032172  |
| SMG | NM_172365    | PPP1R36  | chr14 | 65032343  | 65032410  |
| SMG | NM_172365    | PPP1R36  | chr14 | 65035066  | 65035165  |
| SMG | NM_172365    | PPP1R36  | chr14 | 65041172  | 65041307  |
| SMG | NM_172365    | PPP1R36  | chr14 | 65053554  | 65053597  |
| SMG | NM_172365    | PPP1R36  | chr14 | 65053911  | 65054090  |
| SMG | NM_172365    | PPP1R36  | chr14 | 65054821  | 65055013  |
| SMG | NM_172365    | PPP1R36  | chr14 | 65055869  | 65056096  |
| SMG | NM_001271899 | PPP2R2B  | chr5  | 145969066 | 145969789 |
| SMG | NM_001271899 | PPP2R2B  | chr5  | 145972533 | 145972625 |
| SMG | NM_001271899 | PPP2R2B  | chr5  | 145979853 | 145980023 |
| SMG | NM_001271899 | PPP2R2B  | chr5  | 146017813 | 146017978 |
| SMG | NM_001271899 | PPP2R2B  | chr5  | 146030109 | 146030287 |
| SMG | NM_001271899 | PPP2R2B  | chr5  | 146070690 | 146070803 |
| SMG | NM_001271899 | PPP2R2B  | chr5  | 146077541 | 146077707 |
| SMG | NM_001271899 | PPP2R2B  | chr5  | 146080607 | 146080705 |
| SMG | NM_001271899 | PPP2R2B  | chr5  | 146460621 | 146460699 |
| SMG | NM_001271899 | PPP2R2B  | chr5  | 146460819 | 146461083 |

|     |              |        |       |          |          |
|-----|--------------|--------|-------|----------|----------|
| SMG | NM_001142353 | PPP3CB | chr10 | 75196562 | 75198178 |
| SMG | NM_001142353 | PPP3CB | chr10 | 75199629 | 75199659 |
| SMG | NM_001142353 | PPP3CB | chr10 | 75204482 | 75204580 |
| SMG | NM_001142353 | PPP3CB | chr10 | 75206249 | 75206334 |
| SMG | NM_001142353 | PPP3CB | chr10 | 75214169 | 75214247 |
| SMG | NM_001142353 | PPP3CB | chr10 | 75227310 | 75227436 |
| SMG | NM_001142353 | PPP3CB | chr10 | 75230444 | 75230539 |
| SMG | NM_001142353 | PPP3CB | chr10 | 75230644 | 75230722 |
| SMG | NM_001142353 | PPP3CB | chr10 | 75230827 | 75230967 |
| SMG | NM_001142353 | PPP3CB | chr10 | 75231225 | 75231371 |
| SMG | NM_001142353 | PPP3CB | chr10 | 75234676 | 75234788 |
| SMG | NM_001142353 | PPP3CB | chr10 | 75238256 | 75238381 |
| SMG | NM_001142353 | PPP3CB | chr10 | 75239074 | 75239275 |
| SMG | NM_001142353 | PPP3CB | chr10 | 75255562 | 75255782 |
| CNV | NM_024870    | PREX2  | chr8  | 68864602 | 68864770 |
| CNV | NM_024870    | PREX2  | chr8  | 68930080 | 68930152 |
| CNV | NM_024870    | PREX2  | chr8  | 68931783 | 68931906 |
| CNV | NM_024870    | PREX2  | chr8  | 68934270 | 68934375 |
| CNV | NM_024870    | PREX2  | chr8  | 68939456 | 68939558 |
| CNV | NM_024870    | PREX2  | chr8  | 68942731 | 68942893 |
| CNV | NM_024870    | PREX2  | chr8  | 68950393 | 68950527 |
| CNV | NM_024870    | PREX2  | chr8  | 68956721 | 68956825 |
| CNV | NM_024870    | PREX2  | chr8  | 68965331 | 68965481 |
| CNV | NM_024870    | PREX2  | chr8  | 68968064 | 68968209 |
| CNV | NM_024870    | PREX2  | chr8  | 68972913 | 68973014 |
| CNV | NM_024870    | PREX2  | chr8  | 68981267 | 68981371 |
| CNV | NM_024870    | PREX2  | chr8  | 68982069 | 68982119 |
| CNV | NM_024870    | PREX2  | chr8  | 68984729 | 68984805 |
| CNV | NM_024870    | PREX2  | chr8  | 68989631 | 68989704 |
| CNV | NM_024870    | PREX2  | chr8  | 68992677 | 68992820 |
| CNV | NM_024870    | PREX2  | chr8  | 68992980 | 68993073 |
| CNV | NM_024870    | PREX2  | chr8  | 68995474 | 68995623 |
| CNV | NM_024870    | PREX2  | chr8  | 68999958 | 69000044 |
| CNV | NM_024870    | PREX2  | chr8  | 69002813 | 69002950 |
| CNV | NM_024870    | PREX2  | chr8  | 69005839 | 69005957 |
| CNV | NM_024870    | PREX2  | chr8  | 69009251 | 69009436 |
| CNV | NM_024870    | PREX2  | chr8  | 69011916 | 69012078 |
| CNV | NM_024870    | PREX2  | chr8  | 69020343 | 69020566 |
| CNV | NM_024870    | PREX2  | chr8  | 69021650 | 69021858 |
| CNV | NM_024870    | PREX2  | chr8  | 69027987 | 69028167 |
| CNV | NM_024870    | PREX2  | chr8  | 69030784 | 69030879 |
| CNV | NM_024870    | PREX2  | chr8  | 69031666 | 69031749 |
| CNV | NM_024870    | PREX2  | chr8  | 69032430 | 69032521 |



|     |              |       |       |          |          |
|-----|--------------|-------|-------|----------|----------|
| CNV | NM_024870    | PREX2 | chr8  | 69033155 | 69033284 |
| CNV | NM_024870    | PREX2 | chr8  | 69039612 | 69039654 |
| CNV | NM_024870    | PREX2 | chr8  | 69046293 | 69046511 |
| CNV | NM_024870    | PREX2 | chr8  | 69050649 | 69050752 |
| CNV | NM_024870    | PREX2 | chr8  | 69058443 | 69058587 |
| CNV | NM_024870    | PREX2 | chr8  | 69069556 | 69069671 |
| CNV | NM_024870    | PREX2 | chr8  | 69103956 | 69104023 |
| CNV | NM_024870    | PREX2 | chr8  | 69104569 | 69104760 |
| CNV | NM_024870    | PREX2 | chr8  | 69129850 | 69129953 |
| CNV | NM_024870    | PREX2 | chr8  | 69136793 | 69136861 |
| CNV | NM_024870    | PREX2 | chr8  | 69143567 | 69143897 |
| SMG | NM_001243245 | PRG2  | chr11 | 57154833 | 57155006 |
| SMG | NM_001243245 | PRG2  | chr11 | 57155226 | 57155338 |
| SMG | NM_001243245 | PRG2  | chr11 | 57156049 | 57156181 |
| SMG | NM_001243245 | PRG2  | chr11 | 57156515 | 57156790 |
| SMG | NM_001243245 | PRG2  | chr11 | 57157359 | 57157429 |
| SMG | NM_001243245 | PRG2  | chr11 | 57158068 | 57158130 |
| LIT | NM_002742    | PRKD1 | chr14 | 30045686 | 30046662 |
| LIT | NM_002742    | PRKD1 | chr14 | 30047480 | 30047566 |
| LIT | NM_002742    | PRKD1 | chr14 | 30066696 | 30066964 |
| LIT | NM_002742    | PRKD1 | chr14 | 30068232 | 30068331 |
| LIT | NM_002742    | PRKD1 | chr14 | 30068861 | 30069023 |
| LIT | NM_002742    | PRKD1 | chr14 | 30093357 | 30093464 |
| LIT | NM_002742    | PRKD1 | chr14 | 30095689 | 30095762 |
| LIT | NM_002742    | PRKD1 | chr14 | 30098246 | 30098299 |
| LIT | NM_002742    | PRKD1 | chr14 | 30099947 | 30100227 |
| LIT | NM_002742    | PRKD1 | chr14 | 30102074 | 30102152 |
| LIT | NM_002742    | PRKD1 | chr14 | 30103623 | 30103747 |
| LIT | NM_002742    | PRKD1 | chr14 | 30105495 | 30105700 |
| LIT | NM_002742    | PRKD1 | chr14 | 30107694 | 30107772 |
| LIT | NM_002742    | PRKD1 | chr14 | 30107899 | 30108110 |
| LIT | NM_002742    | PRKD1 | chr14 | 30132904 | 30133065 |
| LIT | NM_002742    | PRKD1 | chr14 | 30135282 | 30135414 |
| LIT | NM_002742    | PRKD1 | chr14 | 30194741 | 30194880 |
| LIT | NM_002742    | PRKD1 | chr14 | 30396454 | 30396899 |
| LIT | NM_001081640 | PRKDC | chr8  | 48685668 | 48686938 |
| LIT | NM_001081640 | PRKDC | chr8  | 48689404 | 48689544 |
| LIT | NM_001081640 | PRKDC | chr8  | 48690246 | 48690435 |
| LIT | NM_001081640 | PRKDC | chr8  | 48691019 | 48691221 |
| LIT | NM_001081640 | PRKDC | chr8  | 48691288 | 48691360 |
| LIT | NM_001081640 | PRKDC | chr8  | 48691564 | 48691654 |
| LIT | NM_001081640 | PRKDC | chr8  | 48694938 | 48695159 |
| LIT | NM_001081640 | PRKDC | chr8  | 48696302 | 48696370 |

|     |              |       |      |          |          |
|-----|--------------|-------|------|----------|----------|
| LIT | NM_001081640 | PRKDC | chr8 | 48697673 | 48697878 |
| LIT | NM_001081640 | PRKDC | chr8 | 48701466 | 48701610 |
| LIT | NM_001081640 | PRKDC | chr8 | 48701711 | 48701799 |
| LIT | NM_001081640 | PRKDC | chr8 | 48706850 | 48707062 |
| LIT | NM_001081640 | PRKDC | chr8 | 48710797 | 48710958 |
| LIT | NM_001081640 | PRKDC | chr8 | 48711770 | 48711951 |
| LIT | NM_001081640 | PRKDC | chr8 | 48713353 | 48713547 |
| LIT | NM_001081640 | PRKDC | chr8 | 48715866 | 48716041 |
| LIT | NM_001081640 | PRKDC | chr8 | 48719697 | 48719887 |
| LIT | NM_001081640 | PRKDC | chr8 | 48730010 | 48730122 |
| LIT | NM_001081640 | PRKDC | chr8 | 48731962 | 48732071 |
| LIT | NM_001081640 | PRKDC | chr8 | 48733279 | 48733504 |
| LIT | NM_001081640 | PRKDC | chr8 | 48734164 | 48734353 |
| LIT | NM_001081640 | PRKDC | chr8 | 48736418 | 48736557 |
| LIT | NM_001081640 | PRKDC | chr8 | 48739216 | 48739422 |
| LIT | NM_001081640 | PRKDC | chr8 | 48740728 | 48740908 |
| LIT | NM_001081640 | PRKDC | chr8 | 48743165 | 48743297 |
| LIT | NM_001081640 | PRKDC | chr8 | 48744374 | 48744487 |
| LIT | NM_001081640 | PRKDC | chr8 | 48746756 | 48746957 |
| LIT | NM_001081640 | PRKDC | chr8 | 48748898 | 48749088 |
| LIT | NM_001081640 | PRKDC | chr8 | 48749772 | 48749980 |
| LIT | NM_001081640 | PRKDC | chr8 | 48751708 | 48751807 |
| LIT | NM_001081640 | PRKDC | chr8 | 48752576 | 48752750 |
| LIT | NM_001081640 | PRKDC | chr8 | 48761714 | 48761864 |
| LIT | NM_001081640 | PRKDC | chr8 | 48761939 | 48762064 |
| LIT | NM_001081640 | PRKDC | chr8 | 48765233 | 48765345 |
| LIT | NM_001081640 | PRKDC | chr8 | 48766643 | 48766775 |
| LIT | NM_001081640 | PRKDC | chr8 | 48767782 | 48767934 |
| LIT | NM_001081640 | PRKDC | chr8 | 48769716 | 48769860 |
| LIT | NM_001081640 | PRKDC | chr8 | 48771076 | 48771196 |
| LIT | NM_001081640 | PRKDC | chr8 | 48771409 | 48771547 |
| LIT | NM_001081640 | PRKDC | chr8 | 48772171 | 48772320 |
| LIT | NM_001081640 | PRKDC | chr8 | 48773459 | 48773532 |
| LIT | NM_001081640 | PRKDC | chr8 | 48774622 | 48774688 |
| LIT | NM_001081640 | PRKDC | chr8 | 48774933 | 48775102 |
| LIT | NM_001081640 | PRKDC | chr8 | 48775959 | 48776138 |
| LIT | NM_001081640 | PRKDC | chr8 | 48777116 | 48777324 |
| LIT | NM_001081640 | PRKDC | chr8 | 48790284 | 48790412 |
| LIT | NM_001081640 | PRKDC | chr8 | 48792051 | 48792219 |
| LIT | NM_001081640 | PRKDC | chr8 | 48793976 | 48794081 |
| LIT | NM_001081640 | PRKDC | chr8 | 48794472 | 48794658 |
| LIT | NM_001081640 | PRKDC | chr8 | 48798504 | 48798708 |
| LIT | NM_001081640 | PRKDC | chr8 | 48800107 | 48800266 |

|     |              |       |       |          |          |
|-----|--------------|-------|-------|----------|----------|
| LIT | NM_001081640 | PRKDC | chr8  | 48801078 | 48801211 |
| LIT | NM_001081640 | PRKDC | chr8  | 48801574 | 48801783 |
| LIT | NM_001081640 | PRKDC | chr8  | 48802817 | 48803041 |
| LIT | NM_001081640 | PRKDC | chr8  | 48805699 | 48805947 |
| LIT | NM_001081640 | PRKDC | chr8  | 48809720 | 48809854 |
| LIT | NM_001081640 | PRKDC | chr8  | 48811029 | 48811129 |
| LIT | NM_001081640 | PRKDC | chr8  | 48812932 | 48813027 |
| LIT | NM_001081640 | PRKDC | chr8  | 48815128 | 48815355 |
| LIT | NM_001081640 | PRKDC | chr8  | 48817428 | 48817536 |
| LIT | NM_001081640 | PRKDC | chr8  | 48824969 | 48825122 |
| LIT | NM_001081640 | PRKDC | chr8  | 48826460 | 48826624 |
| LIT | NM_001081640 | PRKDC | chr8  | 48827887 | 48827978 |
| LIT | NM_001081640 | PRKDC | chr8  | 48830836 | 48830943 |
| LIT | NM_001081640 | PRKDC | chr8  | 48839753 | 48839913 |
| LIT | NM_001081640 | PRKDC | chr8  | 48840330 | 48840450 |
| LIT | NM_001081640 | PRKDC | chr8  | 48841651 | 48841738 |
| LIT | NM_001081640 | PRKDC | chr8  | 48842412 | 48842572 |
| LIT | NM_001081640 | PRKDC | chr8  | 48843231 | 48843347 |
| LIT | NM_001081640 | PRKDC | chr8  | 48845579 | 48845732 |
| LIT | NM_001081640 | PRKDC | chr8  | 48846524 | 48846650 |
| LIT | NM_001081640 | PRKDC | chr8  | 48847568 | 48847618 |
| LIT | NM_001081640 | PRKDC | chr8  | 48848291 | 48848460 |
| LIT | NM_001081640 | PRKDC | chr8  | 48848912 | 48849077 |
| LIT | NM_001081640 | PRKDC | chr8  | 48852110 | 48852257 |
| LIT | NM_001081640 | PRKDC | chr8  | 48855768 | 48855926 |
| LIT | NM_001081640 | PRKDC | chr8  | 48856412 | 48856443 |
| LIT | NM_001081640 | PRKDC | chr8  | 48856533 | 48856589 |
| LIT | NM_001081640 | PRKDC | chr8  | 48866179 | 48866279 |
| LIT | NM_001081640 | PRKDC | chr8  | 48866366 | 48866479 |
| LIT | NM_001081640 | PRKDC | chr8  | 48866897 | 48867006 |
| LIT | NM_001081640 | PRKDC | chr8  | 48868433 | 48868508 |
| LIT | NM_001081640 | PRKDC | chr8  | 48869730 | 48869823 |
| LIT | NM_001081640 | PRKDC | chr8  | 48869914 | 48869991 |
| LIT | NM_001081640 | PRKDC | chr8  | 48872532 | 48872743 |
| CNV | NM_001098512 | PRKG1 | chr10 | 52750910 | 52751404 |
| CNV | NM_001098512 | PRKG1 | chr10 | 52912923 | 52913090 |
| CNV | NM_001098512 | PRKG1 | chr10 | 53227482 | 53227596 |
| CNV | NM_001098512 | PRKG1 | chr10 | 53564344 | 53564450 |
| CNV | NM_001098512 | PRKG1 | chr10 | 53667266 | 53667330 |
| CNV | NM_001098512 | PRKG1 | chr10 | 53814243 | 53814321 |
| CNV | NM_001098512 | PRKG1 | chr10 | 53822296 | 53822391 |
| CNV | NM_001098512 | PRKG1 | chr10 | 53893599 | 53893665 |
| CNV | NM_001098512 | PRKG1 | chr10 | 53921648 | 53921723 |

|     |              |        |       |           |           |
|-----|--------------|--------|-------|-----------|-----------|
| CNV | NM_001098512 | PRKG1  | chr10 | 54011329  | 54011426  |
| CNV | NM_001098512 | PRKG1  | chr10 | 54031109  | 54031249  |
| CNV | NM_001098512 | PRKG1  | chr10 | 54032151  | 54032241  |
| CNV | NM_001098512 | PRKG1  | chr10 | 54040548  | 54040690  |
| CNV | NM_001098512 | PRKG1  | chr10 | 54041912  | 54042076  |
| CNV | NM_001098512 | PRKG1  | chr10 | 54048485  | 54048608  |
| CNV | NM_001098512 | PRKG1  | chr10 | 54048690  | 54048753  |
| CNV | NM_001098512 | PRKG1  | chr10 | 54049983  | 54050050  |
| CNV | NM_001098512 | PRKG1  | chr10 | 54053561  | 54058110  |
| CNV | NM_001256536 | PRMT8  | chr12 | 3490514   | 3490608   |
| CNV | NM_001256536 | PRMT8  | chr12 | 3649771   | 3649957   |
| CNV | NM_001256536 | PRMT8  | chr12 | 3659101   | 3659257   |
| CNV | NM_001256536 | PRMT8  | chr12 | 3662816   | 3662880   |
| CNV | NM_001256536 | PRMT8  | chr12 | 3677871   | 3678014   |
| CNV | NM_001256536 | PRMT8  | chr12 | 3678642   | 3678730   |
| CNV | NM_001256536 | PRMT8  | chr12 | 3686036   | 3686152   |
| CNV | NM_001256536 | PRMT8  | chr12 | 3692223   | 3692374   |
| CNV | NM_001256536 | PRMT8  | chr12 | 3701396   | 3701518   |
| CNV | NM_001256536 | PRMT8  | chr12 | 3702264   | 3703138   |
| DRV | NM_000314    | PTEN   | chr10 | 89623194  | 89624305  |
| DRV | NM_000314    | PTEN   | chr10 | 89653781  | 89653866  |
| DRV | NM_000314    | PTEN   | chr10 | 89685269  | 89685314  |
| DRV | NM_000314    | PTEN   | chr10 | 89690802  | 89690846  |
| DRV | NM_000314    | PTEN   | chr10 | 89692769  | 89693008  |
| DRV | NM_000314    | PTEN   | chr10 | 89711874  | 89712016  |
| DRV | NM_000314    | PTEN   | chr10 | 89717609  | 89717776  |
| DRV | NM_000314    | PTEN   | chr10 | 89720650  | 89720875  |
| DRV | NM_000314    | PTEN   | chr10 | 89725043  | 89728532  |
| CNV | NM_000958    | PTGER4 | chr5  | 40680031  | 40680580  |
| CNV | NM_000958    | PTGER4 | chr5  | 40681052  | 40681962  |
| CNV | NM_000958    | PTGER4 | chr5  | 40691880  | 40693837  |
| SMG | NM_002825    | PTN    | chr7  | 136912091 | 136912822 |
| SMG | NM_002825    | PTN    | chr7  | 136935976 | 136936138 |
| SMG | NM_002825    | PTN    | chr7  | 136938210 | 136938384 |
| SMG | NM_002825    | PTN    | chr7  | 136939605 | 136939721 |
| SMG | NM_002825    | PTN    | chr7  | 137028184 | 137028546 |
| DRV | NM_002834    | PTPN11 | chr12 | 112856535 | 112856929 |
| DRV | NM_002834    | PTPN11 | chr12 | 112884079 | 112884202 |
| DRV | NM_002834    | PTPN11 | chr12 | 112888121 | 112888316 |
| DRV | NM_002834    | PTPN11 | chr12 | 112890998 | 112891191 |
| DRV | NM_002834    | PTPN11 | chr12 | 112892367 | 112892484 |
| DRV | NM_002834    | PTPN11 | chr12 | 112893753 | 112893867 |
| DRV | NM_002834    | PTPN11 | chr12 | 112910747 | 112910844 |

|     |              |        |       |           |           |
|-----|--------------|--------|-------|-----------|-----------|
| DRV | NM_002834    | PTPN11 | chr12 | 112915454 | 112915534 |
| DRV | NM_002834    | PTPN11 | chr12 | 112915660 | 112915819 |
| DRV | NM_002834    | PTPN11 | chr12 | 112919877 | 112920009 |
| DRV | NM_002834    | PTPN11 | chr12 | 112924278 | 112924433 |
| DRV | NM_002834    | PTPN11 | chr12 | 112926246 | 112926314 |
| DRV | NM_002834    | PTPN11 | chr12 | 112926827 | 112926979 |
| DRV | NM_002834    | PTPN11 | chr12 | 112939947 | 112940060 |
| DRV | NM_002834    | PTPN11 | chr12 | 112942498 | 112942600 |
| DRV | NM_002834    | PTPN11 | chr12 | 112943628 | 112947717 |
| SMG | NM_002835    | PTPN12 | chr7  | 77166772  | 77166962  |
| SMG | NM_002835    | PTPN12 | chr7  | 77200394  | 77200503  |
| SMG | NM_002835    | PTPN12 | chr7  | 77210743  | 77210820  |
| SMG | NM_002835    | PTPN12 | chr7  | 77212871  | 77212967  |
| SMG | NM_002835    | PTPN12 | chr7  | 77214859  | 77214898  |
| SMG | NM_002835    | PTPN12 | chr7  | 77221501  | 77221573  |
| SMG | NM_002835    | PTPN12 | chr7  | 77227158  | 77227218  |
| SMG | NM_002835    | PTPN12 | chr7  | 77229980  | 77230123  |
| SMG | NM_002835    | PTPN12 | chr7  | 77236551  | 77236618  |
| SMG | NM_002835    | PTPN12 | chr7  | 77240081  | 77240159  |
| SMG | NM_002835    | PTPN12 | chr7  | 77240264  | 77240363  |
| SMG | NM_002835    | PTPN12 | chr7  | 77247796  | 77247882  |
| SMG | NM_002835    | PTPN12 | chr7  | 77256021  | 77256992  |
| SMG | NM_002835    | PTPN12 | chr7  | 77261664  | 77261742  |
| SMG | NM_002835    | PTPN12 | chr7  | 77265098  | 77265166  |
| SMG | NM_002835    | PTPN12 | chr7  | 77266334  | 77266365  |
| SMG | NM_002835    | PTPN12 | chr7  | 77267940  | 77268048  |
| SMG | NM_002835    | PTPN12 | chr7  | 77268535  | 77269388  |
| CNV | NM_001142370 | PTPN18 | chr2  | 131113579 | 131113773 |
| CNV | NM_001142370 | PTPN18 | chr2  | 131126705 | 131126774 |
| CNV | NM_001142370 | PTPN18 | chr2  | 131127337 | 131127400 |
| CNV | NM_001142370 | PTPN18 | chr2  | 131127620 | 131127763 |
| CNV | NM_001142370 | PTPN18 | chr2  | 131128129 | 131128196 |
| CNV | NM_001142370 | PTPN18 | chr2  | 131128277 | 131128355 |
| CNV | NM_001142370 | PTPN18 | chr2  | 131128447 | 131128537 |
| CNV | NM_001142370 | PTPN18 | chr2  | 131128771 | 131128860 |
| CNV | NM_001142370 | PTPN18 | chr2  | 131129829 | 131130056 |
| CNV | NM_001142370 | PTPN18 | chr2  | 131130445 | 131130520 |
| CNV | NM_001142370 | PTPN18 | chr2  | 131130729 | 131132982 |
| LIT | NM_001040712 | PTPRD  | chr9  | 8314245   | 8317942   |
| LIT | NM_001040712 | PTPRD  | chr9  | 8319830   | 8319966   |
| LIT | NM_001040712 | PTPRD  | chr9  | 8331581   | 8331736   |
| LIT | NM_001040712 | PTPRD  | chr9  | 8338921   | 8339047   |
| LIT | NM_001040712 | PTPRD  | chr9  | 8340342   | 8340469   |

|     |              |       |      |          |          |
|-----|--------------|-------|------|----------|----------|
| LIT | NM_001040712 | PTPRD | chr9 | 8341089  | 8341268  |
| LIT | NM_001040712 | PTPRD | chr9 | 8341692  | 8341978  |
| LIT | NM_001040712 | PTPRD | chr9 | 8375935  | 8376090  |
| LIT | NM_001040712 | PTPRD | chr9 | 8376606  | 8376726  |
| LIT | NM_001040712 | PTPRD | chr9 | 8389231  | 8389407  |
| LIT | NM_001040712 | PTPRD | chr9 | 8404536  | 8404660  |
| LIT | NM_001040712 | PTPRD | chr9 | 8436591  | 8436689  |
| LIT | NM_001040712 | PTPRD | chr9 | 8449724  | 8449837  |
| LIT | NM_001040712 | PTPRD | chr9 | 8454579  | 8454591  |
| LIT | NM_001040712 | PTPRD | chr9 | 8460410  | 8460571  |
| LIT | NM_001040712 | PTPRD | chr9 | 8465465  | 8465675  |
| LIT | NM_001040712 | PTPRD | chr9 | 8470994  | 8471085  |
| LIT | NM_001040712 | PTPRD | chr9 | 8484118  | 8484378  |
| LIT | NM_001040712 | PTPRD | chr9 | 8485226  | 8485324  |
| LIT | NM_001040712 | PTPRD | chr9 | 8504260  | 8504405  |
| LIT | NM_001040712 | PTPRD | chr9 | 8507300  | 8507434  |
| LIT | NM_001040712 | PTPRD | chr9 | 8517847  | 8518429  |
| LIT | NM_001040712 | PTPRD | chr9 | 8521276  | 8521546  |
| LIT | NM_001040712 | PTPRD | chr9 | 8523512  | 8523524  |
| LIT | NM_001040712 | PTPRD | chr9 | 8524924  | 8525035  |
| LIT | NM_001040712 | PTPRD | chr9 | 8526626  | 8526644  |
| LIT | NM_001040712 | PTPRD | chr9 | 8528590  | 8528779  |
| LIT | NM_001040712 | PTPRD | chr9 | 8633316  | 8633458  |
| LIT | NM_001040712 | PTPRD | chr9 | 8636698  | 8636844  |
| LIT | NM_001040712 | PTPRD | chr9 | 8733779  | 8733946  |
| LIT | NM_001195001 | PTPRU | chr1 | 29563027 | 29563229 |
| LIT | NM_001195001 | PTPRU | chr1 | 29581786 | 29581918 |
| LIT | NM_001195001 | PTPRU | chr1 | 29585016 | 29585288 |
| LIT | NM_001195001 | PTPRU | chr1 | 29585772 | 29585854 |
| LIT | NM_001195001 | PTPRU | chr1 | 29585960 | 29586076 |
| LIT | NM_001195001 | PTPRU | chr1 | 29586381 | 29586556 |
| LIT | NM_001195001 | PTPRU | chr1 | 29587121 | 29587415 |
| LIT | NM_001195001 | PTPRU | chr1 | 29601959 | 29602268 |
| LIT | NM_001195001 | PTPRU | chr1 | 29605523 | 29605633 |
| LIT | NM_001195001 | PTPRU | chr1 | 29605967 | 29606169 |
| LIT | NM_001195001 | PTPRU | chr1 | 29606550 | 29606653 |
| LIT | NM_001195001 | PTPRU | chr1 | 29609187 | 29609461 |
| LIT | NM_001195001 | PTPRU | chr1 | 29610451 | 29610488 |
| LIT | NM_001195001 | PTPRU | chr1 | 29611242 | 29611381 |
| LIT | NM_001195001 | PTPRU | chr1 | 29618380 | 29618538 |
| LIT | NM_001195001 | PTPRU | chr1 | 29630366 | 29630557 |
| LIT | NM_001195001 | PTPRU | chr1 | 29631285 | 29631361 |
| LIT | NM_001195001 | PTPRU | chr1 | 29631863 | 29631940 |

|     |              |       |       |           |           |
|-----|--------------|-------|-------|-----------|-----------|
| LIT | NM_001195001 | PTPRU | chr1  | 29637255  | 29637292  |
| LIT | NM_001195001 | PTPRU | chr1  | 29637967  | 29638056  |
| LIT | NM_001195001 | PTPRU | chr1  | 29638154  | 29638271  |
| LIT | NM_001195001 | PTPRU | chr1  | 29639063  | 29639218  |
| LIT | NM_001195001 | PTPRU | chr1  | 29641883  | 29642019  |
| LIT | NM_001195001 | PTPRU | chr1  | 29642513  | 29642663  |
| LIT | NM_001195001 | PTPRU | chr1  | 29644259  | 29644433  |
| LIT | NM_001195001 | PTPRU | chr1  | 29647196  | 29647337  |
| LIT | NM_001195001 | PTPRU | chr1  | 29649882  | 29650008  |
| LIT | NM_001195001 | PTPRU | chr1  | 29650142  | 29650300  |
| LIT | NM_001195001 | PTPRU | chr1  | 29651702  | 29651838  |
| LIT | NM_001195001 | PTPRU | chr1  | 29652110  | 29653325  |
| SMG | NM_002852    | PTX3  | chr3  | 157154579 | 157154852 |
| SMG | NM_002852    | PTX3  | chr3  | 157155301 | 157155703 |
| SMG | NM_002852    | PTX3  | chr3  | 157160154 | 157161417 |
| SMG | NM_005049    | PWP2  | chr21 | 45527207  | 45527315  |
| SMG | NM_005049    | PWP2  | chr21 | 45528864  | 45528977  |
| SMG | NM_005049    | PWP2  | chr21 | 45533633  | 45533728  |
| SMG | NM_005049    | PWP2  | chr21 | 45534059  | 45534159  |
| SMG | NM_005049    | PWP2  | chr21 | 45534505  | 45534649  |
| SMG | NM_005049    | PWP2  | chr21 | 45535144  | 45535280  |
| SMG | NM_005049    | PWP2  | chr21 | 45535571  | 45535801  |
| SMG | NM_005049    | PWP2  | chr21 | 45537700  | 45537844  |
| SMG | NM_005049    | PWP2  | chr21 | 45538643  | 45538714  |
| SMG | NM_005049    | PWP2  | chr21 | 45539267  | 45539404  |
| SMG | NM_005049    | PWP2  | chr21 | 45540228  | 45540377  |
| SMG | NM_005049    | PWP2  | chr21 | 45540511  | 45540659  |
| SMG | NM_005049    | PWP2  | chr21 | 45540832  | 45540983  |
| SMG | NM_005049    | PWP2  | chr21 | 45542057  | 45542238  |
| SMG | NM_005049    | PWP2  | chr21 | 45544460  | 45544608  |
| SMG | NM_005049    | PWP2  | chr21 | 45545891  | 45546000  |
| SMG | NM_005049    | PWP2  | chr21 | 45546780  | 45546846  |
| SMG | NM_005049    | PWP2  | chr21 | 45547812  | 45548031  |
| SMG | NM_005049    | PWP2  | chr21 | 45548127  | 45548278  |
| SMG | NM_005049    | PWP2  | chr21 | 45548432  | 45548507  |
| SMG | NM_005049    | PWP2  | chr21 | 45550478  | 45551063  |
| CNV | NM_144651    | PXDNL | chr8  | 52232136  | 52232582  |
| CNV | NM_144651    | PXDNL | chr8  | 52233343  | 52233457  |
| CNV | NM_144651    | PXDNL | chr8  | 52252183  | 52252313  |
| CNV | NM_144651    | PXDNL | chr8  | 52258392  | 52258507  |
| CNV | NM_144651    | PXDNL | chr8  | 52284432  | 52284641  |
| CNV | NM_144651    | PXDNL | chr8  | 52287156  | 52287291  |
| CNV | NM_144651    | PXDNL | chr8  | 52320626  | 52322121  |

|     |              |          |       |           |           |
|-----|--------------|----------|-------|-----------|-----------|
| CNV | NM_144651    | PXDNL    | chr8  | 52323809  | 52323967  |
| CNV | NM_144651    | PXDNL    | chr8  | 52325709  | 52325818  |
| CNV | NM_144651    | PXDNL    | chr8  | 52336134  | 52336291  |
| CNV | NM_144651    | PXDNL    | chr8  | 52339205  | 52339318  |
| CNV | NM_144651    | PXDNL    | chr8  | 52359563  | 52359722  |
| CNV | NM_144651    | PXDNL    | chr8  | 52361561  | 52361678  |
| CNV | NM_144651    | PXDNL    | chr8  | 52366078  | 52366345  |
| CNV | NM_144651    | PXDNL    | chr8  | 52370057  | 52370227  |
| CNV | NM_144651    | PXDNL    | chr8  | 52384746  | 52384864  |
| CNV | NM_144651    | PXDNL    | chr8  | 52387531  | 52387701  |
| CNV | NM_144651    | PXDNL    | chr8  | 52396202  | 52396274  |
| CNV | NM_144651    | PXDNL    | chr8  | 52412258  | 52412330  |
| CNV | NM_144651    | PXDNL    | chr8  | 52469399  | 52469471  |
| CNV | NM_144651    | PXDNL    | chr8  | 52505186  | 52505258  |
| CNV | NM_144651    | PXDNL    | chr8  | 52567248  | 52567320  |
| CNV | NM_144651    | PXDNL    | chr8  | 52721740  | 52722005  |
| SMG | NM_001172663 | RAB40C   | chr16 | 639356    | 639547    |
| SMG | NM_001172663 | RAB40C   | chr16 | 640260    | 640433    |
| SMG | NM_001172663 | RAB40C   | chr16 | 667207    | 667268    |
| SMG | NM_001172663 | RAB40C   | chr16 | 668199    | 668260    |
| SMG | NM_001172663 | RAB40C   | chr16 | 675431    | 675509    |
| SMG | NM_001172663 | RAB40C   | chr16 | 675898    | 676121    |
| SMG | NM_001172663 | RAB40C   | chr16 | 677341    | 679273    |
| CNV | NR_000039    | RAB9BP1  | chr5  | 104435174 | 104435799 |
| CNV | NM_001145522 | RAI14    | chr5  | 34656432  | 34656580  |
| CNV | NM_001145522 | RAI14    | chr5  | 34686976  | 34687060  |
| CNV | NM_001145522 | RAI14    | chr5  | 34757572  | 34757703  |
| CNV | NM_001145522 | RAI14    | chr5  | 34796043  | 34796132  |
| CNV | NM_001145522 | RAI14    | chr5  | 34803816  | 34803881  |
| CNV | NM_001145522 | RAI14    | chr5  | 34807904  | 34807962  |
| CNV | NM_001145522 | RAI14    | chr5  | 34808688  | 34808759  |
| CNV | NM_001145522 | RAI14    | chr5  | 34811116  | 34811223  |
| CNV | NM_001145522 | RAI14    | chr5  | 34811871  | 34812050  |
| CNV | NM_001145522 | RAI14    | chr5  | 34812284  | 34812313  |
| CNV | NM_001145522 | RAI14    | chr5  | 34814687  | 34814774  |
| CNV | NM_001145522 | RAI14    | chr5  | 34818901  | 34818956  |
| CNV | NM_001145522 | RAI14    | chr5  | 34821836  | 34821955  |
| CNV | NM_001145522 | RAI14    | chr5  | 34823060  | 34824596  |
| CNV | NM_001145522 | RAI14    | chr5  | 34826434  | 34826584  |
| CNV | NM_001145522 | RAI14    | chr5  | 34829836  | 34829902  |
| CNV | NM_001145522 | RAI14    | chr5  | 34830792  | 34832717  |
| CNV | NM_020343    | RALGAPA2 | chr20 | 20370271  | 20373897  |
| CNV | NM_020343    | RALGAPA2 | chr20 | 20377338  | 20377378  |



|     |           |          |       |          |          |
|-----|-----------|----------|-------|----------|----------|
| CNV | NM_020343 | RALGAPA2 | chr20 | 20392670 | 20392792 |
| CNV | NM_020343 | RALGAPA2 | chr20 | 20453472 | 20453600 |
| CNV | NM_020343 | RALGAPA2 | chr20 | 20475760 | 20475919 |
| CNV | NM_020343 | RALGAPA2 | chr20 | 20483994 | 20484150 |
| CNV | NM_020343 | RALGAPA2 | chr20 | 20486054 | 20486178 |
| CNV | NM_020343 | RALGAPA2 | chr20 | 20491897 | 20491969 |
| CNV | NM_020343 | RALGAPA2 | chr20 | 20493156 | 20493928 |
| CNV | NM_020343 | RALGAPA2 | chr20 | 20501560 | 20501744 |
| CNV | NM_020343 | RALGAPA2 | chr20 | 20505049 | 20505187 |
| CNV | NM_020343 | RALGAPA2 | chr20 | 20505473 | 20505542 |
| CNV | NM_020343 | RALGAPA2 | chr20 | 20506895 | 20507006 |
| CNV | NM_020343 | RALGAPA2 | chr20 | 20512330 | 20512439 |
| CNV | NM_020343 | RALGAPA2 | chr20 | 20516388 | 20516447 |
| CNV | NM_020343 | RALGAPA2 | chr20 | 20517299 | 20517428 |
| CNV | NM_020343 | RALGAPA2 | chr20 | 20527347 | 20527476 |
| CNV | NM_020343 | RALGAPA2 | chr20 | 20552101 | 20552257 |
| CNV | NM_020343 | RALGAPA2 | chr20 | 20552491 | 20552590 |
| CNV | NM_020343 | RALGAPA2 | chr20 | 20553518 | 20553712 |
| CNV | NM_020343 | RALGAPA2 | chr20 | 20563693 | 20563870 |
| CNV | NM_020343 | RALGAPA2 | chr20 | 20565508 | 20565599 |
| CNV | NM_020343 | RALGAPA2 | chr20 | 20569911 | 20570009 |
| CNV | NM_020343 | RALGAPA2 | chr20 | 20571820 | 20571958 |
| CNV | NM_020343 | RALGAPA2 | chr20 | 20582325 | 20582490 |
| CNV | NM_020343 | RALGAPA2 | chr20 | 20585818 | 20586056 |
| CNV | NM_020343 | RALGAPA2 | chr20 | 20591958 | 20592070 |
| CNV | NM_020343 | RALGAPA2 | chr20 | 20596686 | 20596835 |
| CNV | NM_020343 | RALGAPA2 | chr20 | 20599920 | 20600058 |
| CNV | NM_020343 | RALGAPA2 | chr20 | 20601106 | 20601274 |
| CNV | NM_020343 | RALGAPA2 | chr20 | 20610006 | 20610234 |
| CNV | NM_020343 | RALGAPA2 | chr20 | 20616061 | 20616261 |
| CNV | NM_020343 | RALGAPA2 | chr20 | 20618006 | 20618145 |
| CNV | NM_020343 | RALGAPA2 | chr20 | 20620428 | 20620544 |
| CNV | NM_020343 | RALGAPA2 | chr20 | 20621344 | 20621522 |
| CNV | NM_020343 | RALGAPA2 | chr20 | 20624149 | 20624193 |
| CNV | NM_020343 | RALGAPA2 | chr20 | 20634173 | 20634231 |
| CNV | NM_020343 | RALGAPA2 | chr20 | 20656879 | 20656932 |
| CNV | NM_020343 | RALGAPA2 | chr20 | 20661334 | 20661445 |
| CNV | NM_020343 | RALGAPA2 | chr20 | 20693017 | 20693266 |
| SMG | NM_005856 | RAMP3    | chr7  | 45197366 | 45197485 |
| SMG | NM_005856 | RAMP3    | chr7  | 45216907 | 45217040 |
| SMG | NM_005856 | RAMP3    | chr7  | 45222755 | 45223850 |
| SMG | NM_016152 | RARB     | chr3  | 25469753 | 25470022 |
| SMG | NM_016152 | RARB     | chr3  | 25502683 | 25502832 |

|     |           |       |       |          |          |
|-----|-----------|-------|-------|----------|----------|
| SMG | NM_016152 | RARB  | chr3  | 25542672 | 25542814 |
| SMG | NM_016152 | RARB  | chr3  | 25611248 | 25611409 |
| SMG | NM_016152 | RARB  | chr3  | 25622036 | 25622213 |
| SMG | NM_016152 | RARB  | chr3  | 25634993 | 25635198 |
| SMG | NM_016152 | RARB  | chr3  | 25636010 | 25636169 |
| SMG | NM_016152 | RARB  | chr3  | 25637910 | 25639422 |
| SMG | NM_020320 | RARS2 | chr6  | 88224095 | 88224217 |
| SMG | NM_020320 | RARS2 | chr6  | 88224674 | 88224738 |
| SMG | NM_020320 | RARS2 | chr6  | 88226523 | 88226598 |
| SMG | NM_020320 | RARS2 | chr6  | 88227886 | 88227982 |
| SMG | NM_020320 | RARS2 | chr6  | 88228347 | 88228457 |
| SMG | NM_020320 | RARS2 | chr6  | 88228541 | 88228609 |
| SMG | NM_020320 | RARS2 | chr6  | 88229300 | 88229425 |
| SMG | NM_020320 | RARS2 | chr6  | 88229897 | 88229974 |
| SMG | NM_020320 | RARS2 | chr6  | 88231181 | 88231242 |
| SMG | NM_020320 | RARS2 | chr6  | 88234274 | 88234370 |
| SMG | NM_020320 | RARS2 | chr6  | 88239259 | 88239366 |
| SMG | NM_020320 | RARS2 | chr6  | 88240501 | 88240660 |
| SMG | NM_020320 | RARS2 | chr6  | 88251635 | 88251712 |
| SMG | NM_020320 | RARS2 | chr6  | 88255333 | 88255417 |
| SMG | NM_020320 | RARS2 | chr6  | 88258308 | 88258364 |
| SMG | NM_020320 | RARS2 | chr6  | 88265125 | 88265223 |
| SMG | NM_020320 | RARS2 | chr6  | 88272419 | 88272503 |
| SMG | NM_020320 | RARS2 | chr6  | 88273847 | 88273950 |
| SMG | NM_020320 | RARS2 | chr6  | 88279234 | 88279308 |
| SMG | NM_020320 | RARS2 | chr6  | 88299639 | 88299735 |
| CNV | NM_000321 | RB1   | chr13 | 48877882 | 48878185 |
| CNV | NM_000321 | RB1   | chr13 | 48881415 | 48881542 |
| CNV | NM_000321 | RB1   | chr13 | 48916734 | 48916850 |
| CNV | NM_000321 | RB1   | chr13 | 48919215 | 48919335 |
| CNV | NM_000321 | RB1   | chr13 | 48921960 | 48921999 |
| CNV | NM_000321 | RB1   | chr13 | 48923091 | 48923159 |
| CNV | NM_000321 | RB1   | chr13 | 48934152 | 48934263 |
| CNV | NM_000321 | RB1   | chr13 | 48936950 | 48937093 |
| CNV | NM_000321 | RB1   | chr13 | 48939029 | 48939107 |
| CNV | NM_000321 | RB1   | chr13 | 48941629 | 48941739 |
| CNV | NM_000321 | RB1   | chr13 | 48942662 | 48942740 |
| CNV | NM_000321 | RB1   | chr13 | 48947540 | 48947628 |
| CNV | NM_000321 | RB1   | chr13 | 48951053 | 48951170 |
| CNV | NM_000321 | RB1   | chr13 | 48953729 | 48953786 |
| CNV | NM_000321 | RB1   | chr13 | 48954188 | 48954220 |
| CNV | NM_000321 | RB1   | chr13 | 48954300 | 48954377 |
| CNV | NM_000321 | RB1   | chr13 | 48955382 | 48955579 |

|     |              |         |       |          |          |
|-----|--------------|---------|-------|----------|----------|
| CNV | NM_000321    | RB1     | chr13 | 49027128 | 49027247 |
| CNV | NM_000321    | RB1     | chr13 | 49030339 | 49030485 |
| CNV | NM_000321    | RB1     | chr13 | 49033823 | 49033969 |
| CNV | NM_000321    | RB1     | chr13 | 49037866 | 49037971 |
| CNV | NM_000321    | RB1     | chr13 | 49039133 | 49039247 |
| CNV | NM_000321    | RB1     | chr13 | 49039340 | 49039504 |
| CNV | NM_000321    | RB1     | chr13 | 49047495 | 49047526 |
| CNV | NM_000321    | RB1     | chr13 | 49050836 | 49050979 |
| CNV | NM_000321    | RB1     | chr13 | 49051490 | 49051540 |
| CNV | NM_000321    | RB1     | chr13 | 49054133 | 49056026 |
| CNV | NM_001083617 | RB1CC1  | chr8  | 53535017 | 53536419 |
| CNV | NM_001083617 | RB1CC1  | chr8  | 53537276 | 53537347 |
| CNV | NM_001083617 | RB1CC1  | chr8  | 53540600 | 53540728 |
| CNV | NM_001083617 | RB1CC1  | chr8  | 53543029 | 53543088 |
| CNV | NM_001083617 | RB1CC1  | chr8  | 53547480 | 53547528 |
| CNV | NM_001083617 | RB1CC1  | chr8  | 53548574 | 53548629 |
| CNV | NM_001083617 | RB1CC1  | chr8  | 53554910 | 53555151 |
| CNV | NM_001083617 | RB1CC1  | chr8  | 53555263 | 53555372 |
| CNV | NM_001083617 | RB1CC1  | chr8  | 53558261 | 53558427 |
| CNV | NM_001083617 | RB1CC1  | chr8  | 53568567 | 53570468 |
| CNV | NM_001083617 | RB1CC1  | chr8  | 53570557 | 53570684 |
| CNV | NM_001083617 | RB1CC1  | chr8  | 53571432 | 53571536 |
| CNV | NM_001083617 | RB1CC1  | chr8  | 53573155 | 53573217 |
| CNV | NM_001083617 | RB1CC1  | chr8  | 53573485 | 53573567 |
| CNV | NM_001083617 | RB1CC1  | chr8  | 53573654 | 53573841 |
| CNV | NM_001083617 | RB1CC1  | chr8  | 53574094 | 53574279 |
| CNV | NM_001083617 | RB1CC1  | chr8  | 53580580 | 53580751 |
| CNV | NM_001083617 | RB1CC1  | chr8  | 53586404 | 53586834 |
| CNV | NM_001083617 | RB1CC1  | chr8  | 53588928 | 53589131 |
| CNV | NM_001083617 | RB1CC1  | chr8  | 53596108 | 53596279 |
| CNV | NM_001083617 | RB1CC1  | chr8  | 53596446 | 53596573 |
| CNV | NM_001083617 | RB1CC1  | chr8  | 53597958 | 53598080 |
| CNV | NM_001083617 | RB1CC1  | chr8  | 53599412 | 53599527 |
| CNV | NM_001083617 | RB1CC1  | chr8  | 53626634 | 53627026 |
| SMG | NM_080833    | RBBP8NL | chr20 | 60985292 | 60986052 |
| SMG | NM_080833    | RBBP8NL | chr20 | 60987679 | 60987809 |
| SMG | NM_080833    | RBBP8NL | chr20 | 60987885 | 60987956 |
| SMG | NM_080833    | RBBP8NL | chr20 | 60988456 | 60988601 |
| SMG | NM_080833    | RBBP8NL | chr20 | 60988876 | 60989612 |
| SMG | NM_080833    | RBBP8NL | chr20 | 60990176 | 60990343 |
| SMG | NM_080833    | RBBP8NL | chr20 | 60990633 | 60990716 |
| SMG | NM_080833    | RBBP8NL | chr20 | 60990843 | 60991001 |
| SMG | NM_080833    | RBBP8NL | chr20 | 60991219 | 60991292 |

|     |              |         |       |          |          |
|-----|--------------|---------|-------|----------|----------|
| SMG | NM_080833    | RBBP8NL | chr20 | 60991815 | 60991928 |
| SMG | NM_080833    | RBBP8NL | chr20 | 60992279 | 60992375 |
| SMG | NM_080833    | RBBP8NL | chr20 | 60993478 | 60993521 |
| SMG | NM_080833    | RBBP8NL | chr20 | 60994642 | 60994786 |
| SMG | NM_080833    | RBBP8NL | chr20 | 61002515 | 61002629 |
| CNV | NM_001142333 | RBFOX1  | chr16 | 6069131  | 6069993  |
| CNV | NM_001142333 | RBFOX1  | chr16 | 6366995  | 6367058  |
| CNV | NM_001142333 | RBFOX1  | chr16 | 6704603  | 6704651  |
| CNV | NM_001142333 | RBFOX1  | chr16 | 7102057  | 7102099  |
| CNV | NM_001142333 | RBFOX1  | chr16 | 7568148  | 7568391  |
| CNV | NM_001142333 | RBFOX1  | chr16 | 7629778  | 7629922  |
| CNV | NM_001142333 | RBFOX1  | chr16 | 7637248  | 7637302  |
| CNV | NM_001142333 | RBFOX1  | chr16 | 7645550  | 7645643  |
| CNV | NM_001142333 | RBFOX1  | chr16 | 7647372  | 7647433  |
| CNV | NM_001142333 | RBFOX1  | chr16 | 7657286  | 7657340  |
| CNV | NM_001142333 | RBFOX1  | chr16 | 7703816  | 7703949  |
| CNV | NM_001142333 | RBFOX1  | chr16 | 7714930  | 7714970  |
| CNV | NM_001142333 | RBFOX1  | chr16 | 7726775  | 7726840  |
| CNV | NM_001142333 | RBFOX1  | chr16 | 7759057  | 7759133  |
| CNV | NM_001142333 | RBFOX1  | chr16 | 7760624  | 7763340  |
| SMG | NM_002895    | RBL1    | chr20 | 35624754 | 35627332 |
| SMG | NM_002895    | RBL1    | chr20 | 35632104 | 35632269 |
| SMG | NM_002895    | RBL1    | chr20 | 35635813 | 35635962 |
| SMG | NM_002895    | RBL1    | chr20 | 35646681 | 35646772 |
| SMG | NM_002895    | RBL1    | chr20 | 35649061 | 35649133 |
| SMG | NM_002895    | RBL1    | chr20 | 35651052 | 35651229 |
| SMG | NM_002895    | RBL1    | chr20 | 35661067 | 35661279 |
| SMG | NM_002895    | RBL1    | chr20 | 35663644 | 35663911 |
| SMG | NM_002895    | RBL1    | chr20 | 35668555 | 35668688 |
| SMG | NM_002895    | RBL1    | chr20 | 35672488 | 35672653 |
| SMG | NM_002895    | RBL1    | chr20 | 35675455 | 35675593 |
| SMG | NM_002895    | RBL1    | chr20 | 35683955 | 35684059 |
| SMG | NM_002895    | RBL1    | chr20 | 35684548 | 35684661 |
| SMG | NM_002895    | RBL1    | chr20 | 35689505 | 35689672 |
| SMG | NM_002895    | RBL1    | chr20 | 35690486 | 35690673 |
| SMG | NM_002895    | RBL1    | chr20 | 35693826 | 35693876 |
| SMG | NM_002895    | RBL1    | chr20 | 35695126 | 35695287 |
| SMG | NM_002895    | RBL1    | chr20 | 35695395 | 35695524 |
| SMG | NM_002895    | RBL1    | chr20 | 35695635 | 35695700 |
| SMG | NM_002895    | RBL1    | chr20 | 35696388 | 35696589 |
| SMG | NM_002895    | RBL1    | chr20 | 35717391 | 35717525 |
| SMG | NM_002895    | RBL1    | chr20 | 35724175 | 35724403 |
| SMG | NM_001204466 | RBM10   | chrX  | 47004616 | 47004884 |

|     |              |       |       |           |           |
|-----|--------------|-------|-------|-----------|-----------|
| SMG | NM_001204466 | RBM10 | chrX  | 47006755  | 47006897  |
| SMG | NM_001204466 | RBM10 | chrX  | 47028713  | 47028897  |
| SMG | NM_001204466 | RBM10 | chrX  | 47032526  | 47032596  |
| SMG | NM_001204466 | RBM10 | chrX  | 47034417  | 47034491  |
| SMG | NM_001204466 | RBM10 | chrX  | 47035898  | 47035985  |
| SMG | NM_001204466 | RBM10 | chrX  | 47038501  | 47038562  |
| SMG | NM_001204466 | RBM10 | chrX  | 47038717  | 47038894  |
| SMG | NM_001204466 | RBM10 | chrX  | 47039278  | 47039439  |
| SMG | NM_001204466 | RBM10 | chrX  | 47039610  | 47039708  |
| SMG | NM_001204466 | RBM10 | chrX  | 47039817  | 47039905  |
| SMG | NM_001204466 | RBM10 | chrX  | 47040613  | 47040800  |
| SMG | NM_001204466 | RBM10 | chrX  | 47040905  | 47041045  |
| SMG | NM_001204466 | RBM10 | chrX  | 47041147  | 47041265  |
| SMG | NM_001204466 | RBM10 | chrX  | 47041349  | 47041441  |
| SMG | NM_001204466 | RBM10 | chrX  | 47041560  | 47041725  |
| SMG | NM_001204466 | RBM10 | chrX  | 47044453  | 47044603  |
| SMG | NM_001204466 | RBM10 | chrX  | 47044700  | 47044766  |
| SMG | NM_001204466 | RBM10 | chrX  | 47044840  | 47045029  |
| SMG | NM_001204466 | RBM10 | chrX  | 47045114  | 47045189  |
| SMG | NM_001204466 | RBM10 | chrX  | 47045463  | 47045570  |
| SMG | NM_001204466 | RBM10 | chrX  | 47045656  | 47045786  |
| SMG | NM_001204466 | RBM10 | chrX  | 47045872  | 47046214  |
| SMG | NM_152945    | RBM45 | chr2  | 178977181 | 178977573 |
| SMG | NM_152945    | RBM45 | chr2  | 178980988 | 178981111 |
| SMG | NM_152945    | RBM45 | chr2  | 178982781 | 178982908 |
| SMG | NM_152945    | RBM45 | chr2  | 178985013 | 178985136 |
| SMG | NM_152945    | RBM45 | chr2  | 178985906 | 178986086 |
| SMG | NM_152945    | RBM45 | chr2  | 178988248 | 178988378 |
| SMG | NM_152945    | RBM45 | chr2  | 178988554 | 178988639 |
| SMG | NM_152945    | RBM45 | chr2  | 178988853 | 178989017 |
| SMG | NM_152945    | RBM45 | chr2  | 178990710 | 178990911 |
| SMG | NM_152945    | RBM45 | chr2  | 178994123 | 178994382 |
| SMG | NM_003708    | RDH16 | chr12 | 57345215  | 57346030  |
| SMG | NM_003708    | RDH16 | chr12 | 57346610  | 57346774  |
| SMG | NM_003708    | RDH16 | chr12 | 57348689  | 57348948  |
| SMG | NM_003708    | RDH16 | chr12 | 57350933  | 57351418  |
| LIT | NM_002907    | RECQL | chr12 | 21621843  | 21623280  |
| LIT | NM_002907    | RECQL | chr12 | 21623902  | 21624032  |
| LIT | NM_002907    | RECQL | chr12 | 21624361  | 21624581  |
| LIT | NM_002907    | RECQL | chr12 | 21626484  | 21626576  |
| LIT | NM_002907    | RECQL | chr12 | 21627774  | 21627913  |
| LIT | NM_002907    | RECQL | chr12 | 21628401  | 21628519  |
| LIT | NM_002907    | RECQL | chr12 | 21628609  | 21628758  |

|     |              |       |       |           |           |
|-----|--------------|-------|-------|-----------|-----------|
| LIT | NM_002907    | RECQL | chr12 | 21629844  | 21629926  |
| LIT | NM_002907    | RECQL | chr12 | 21630736  | 21630903  |
| LIT | NM_002907    | RECQL | chr12 | 21636309  | 21636508  |
| LIT | NM_002907    | RECQL | chr12 | 21639412  | 21639519  |
| LIT | NM_002907    | RECQL | chr12 | 21643132  | 21643312  |
| LIT | NM_002907    | RECQL | chr12 | 21644452  | 21644650  |
| LIT | NM_002907    | RECQL | chr12 | 21652488  | 21652549  |
| LIT | NM_002907    | RECQL | chr12 | 21654103  | 21654603  |
| CNV | NM_001008387 | REG3G | chr2  | 79252811  | 79252899  |
| CNV | NM_001008387 | REG3G | chr2  | 79253108  | 79253295  |
| CNV | NM_001008387 | REG3G | chr2  | 79253838  | 79253957  |
| CNV | NM_001008387 | REG3G | chr2  | 79254159  | 79254297  |
| CNV | NM_001008387 | REG3G | chr2  | 79254932  | 79255059  |
| CNV | NM_001008387 | REG3G | chr2  | 79255334  | 79255630  |
| SMG | NM_005045    | RELN  | chr7  | 103112230 | 103113356 |
| SMG | NM_005045    | RELN  | chr7  | 103113448 | 103113453 |
| SMG | NM_005045    | RELN  | chr7  | 103123319 | 103123418 |
| SMG | NM_005045    | RELN  | chr7  | 103124099 | 103124297 |
| SMG | NM_005045    | RELN  | chr7  | 103126643 | 103126863 |
| SMG | NM_005045    | RELN  | chr7  | 103130188 | 103130346 |
| SMG | NM_005045    | RELN  | chr7  | 103131114 | 103131276 |
| SMG | NM_005045    | RELN  | chr7  | 103132399 | 103132473 |
| SMG | NM_005045    | RELN  | chr7  | 103136169 | 103136345 |
| SMG | NM_005045    | RELN  | chr7  | 103136972 | 103137215 |
| SMG | NM_005045    | RELN  | chr7  | 103138266 | 103138373 |
| SMG | NM_005045    | RELN  | chr7  | 103138523 | 103138699 |
| SMG | NM_005045    | RELN  | chr7  | 103141191 | 103141369 |
| SMG | NM_005045    | RELN  | chr7  | 103143462 | 103143677 |
| SMG | NM_005045    | RELN  | chr7  | 103151297 | 103151452 |
| SMG | NM_005045    | RELN  | chr7  | 103155631 | 103155888 |
| SMG | NM_005045    | RELN  | chr7  | 103159769 | 103159963 |
| SMG | NM_005045    | RELN  | chr7  | 103162468 | 103162646 |
| SMG | NM_005045    | RELN  | chr7  | 103163837 | 103163978 |
| SMG | NM_005045    | RELN  | chr7  | 103175762 | 103175931 |
| SMG | NM_005045    | RELN  | chr7  | 103179524 | 103179774 |
| SMG | NM_005045    | RELN  | chr7  | 103180643 | 103180902 |
| SMG | NM_005045    | RELN  | chr7  | 103183177 | 103183325 |
| SMG | NM_005045    | RELN  | chr7  | 103185570 | 103185791 |
| SMG | NM_005045    | RELN  | chr7  | 103191513 | 103191743 |
| SMG | NM_005045    | RELN  | chr7  | 103193907 | 103194010 |
| SMG | NM_005045    | RELN  | chr7  | 103194106 | 103194278 |
| SMG | NM_005045    | RELN  | chr7  | 103197423 | 103197606 |
| SMG | NM_005045    | RELN  | chr7  | 103198411 | 103198496 |

|     |           |      |       |           |           |
|-----|-----------|------|-------|-----------|-----------|
| SMG | NM_005045 | RELN | chr7  | 103201978 | 103202156 |
| SMG | NM_005045 | RELN | chr7  | 103202259 | 103202400 |
| SMG | NM_005045 | RELN | chr7  | 103205724 | 103205998 |
| SMG | NM_005045 | RELN | chr7  | 103206670 | 103206859 |
| SMG | NM_005045 | RELN | chr7  | 103207047 | 103207206 |
| SMG | NM_005045 | RELN | chr7  | 103212630 | 103212707 |
| SMG | NM_005045 | RELN | chr7  | 103214538 | 103214746 |
| SMG | NM_005045 | RELN | chr7  | 103215994 | 103216152 |
| SMG | NM_005045 | RELN | chr7  | 103230042 | 103230275 |
| SMG | NM_005045 | RELN | chr7  | 103234128 | 103234329 |
| SMG | NM_005045 | RELN | chr7  | 103234767 | 103234939 |
| SMG | NM_005045 | RELN | chr7  | 103236902 | 103237108 |
| SMG | NM_005045 | RELN | chr7  | 103243750 | 103243937 |
| SMG | NM_005045 | RELN | chr7  | 103244792 | 103244930 |
| SMG | NM_005045 | RELN | chr7  | 103251141 | 103251254 |
| SMG | NM_005045 | RELN | chr7  | 103252057 | 103252250 |
| SMG | NM_005045 | RELN | chr7  | 103270386 | 103270623 |
| SMG | NM_005045 | RELN | chr7  | 103275871 | 103276033 |
| SMG | NM_005045 | RELN | chr7  | 103276681 | 103276915 |
| SMG | NM_005045 | RELN | chr7  | 103280989 | 103281056 |
| SMG | NM_005045 | RELN | chr7  | 103290720 | 103290830 |
| SMG | NM_005045 | RELN | chr7  | 103292107 | 103292236 |
| SMG | NM_005045 | RELN | chr7  | 103292997 | 103293206 |
| SMG | NM_005045 | RELN | chr7  | 103294539 | 103294652 |
| SMG | NM_005045 | RELN | chr7  | 103301822 | 103301974 |
| SMG | NM_005045 | RELN | chr7  | 103322562 | 103322708 |
| SMG | NM_005045 | RELN | chr7  | 103338299 | 103338540 |
| SMG | NM_005045 | RELN | chr7  | 103341356 | 103341453 |
| SMG | NM_005045 | RELN | chr7  | 103363586 | 103363638 |
| SMG | NM_005045 | RELN | chr7  | 103368557 | 103368654 |
| SMG | NM_005045 | RELN | chr7  | 103389872 | 103389951 |
| SMG | NM_005045 | RELN | chr7  | 103393628 | 103393661 |
| SMG | NM_005045 | RELN | chr7  | 103417003 | 103417074 |
| SMG | NM_005045 | RELN | chr7  | 103473983 | 103474119 |
| SMG | NM_005045 | RELN | chr7  | 103557521 | 103557632 |
| SMG | NM_005045 | RELN | chr7  | 103629577 | 103629963 |
| DRV | NM_020975 | RET  | chr10 | 43572516  | 43572779  |
| DRV | NM_020975 | RET  | chr10 | 43595906  | 43596170  |
| DRV | NM_020975 | RET  | chr10 | 43597789  | 43598077  |
| DRV | NM_020975 | RET  | chr10 | 43600399  | 43600641  |
| DRV | NM_020975 | RET  | chr10 | 43601823  | 43602019  |
| DRV | NM_020975 | RET  | chr10 | 43604478  | 43604678  |
| DRV | NM_020975 | RET  | chr10 | 43606654  | 43606913  |

|     |              |        |       |           |           |
|-----|--------------|--------|-------|-----------|-----------|
| DRV | NM_020975    | RET    | chr10 | 43607546  | 43607672  |
| DRV | NM_020975    | RET    | chr10 | 43608300  | 43608411  |
| DRV | NM_020975    | RET    | chr10 | 43609003  | 43609123  |
| DRV | NM_020975    | RET    | chr10 | 43609927  | 43610184  |
| DRV | NM_020975    | RET    | chr10 | 43612031  | 43612179  |
| DRV | NM_020975    | RET    | chr10 | 43613820  | 43613928  |
| DRV | NM_020975    | RET    | chr10 | 43614978  | 43615193  |
| DRV | NM_020975    | RET    | chr10 | 43615528  | 43615651  |
| DRV | NM_020975    | RET    | chr10 | 43617393  | 43617464  |
| DRV | NM_020975    | RET    | chr10 | 43619118  | 43619256  |
| DRV | NM_020975    | RET    | chr10 | 43620330  | 43620430  |
| DRV | NM_020975    | RET    | chr10 | 43622022  | 43622170  |
| DRV | NM_020975    | RET    | chr10 | 43623559  | 43625797  |
| CNV | NM_015150    | RFTN1  | chr3  | 16357351  | 16358739  |
| CNV | NM_015150    | RFTN1  | chr3  | 16364882  | 16364964  |
| CNV | NM_015150    | RFTN1  | chr3  | 16368279  | 16368383  |
| CNV | NM_015150    | RFTN1  | chr3  | 16399438  | 16399554  |
| CNV | NM_015150    | RFTN1  | chr3  | 16411582  | 16411786  |
| CNV | NM_015150    | RFTN1  | chr3  | 16419224  | 16419609  |
| CNV | NM_015150    | RFTN1  | chr3  | 16450881  | 16450990  |
| CNV | NM_015150    | RFTN1  | chr3  | 16475357  | 16475544  |
| CNV | NM_015150    | RFTN1  | chr3  | 16535231  | 16535384  |
| CNV | NM_015150    | RFTN1  | chr3  | 16554948  | 16555222  |
| CNV | NM_001012761 | RGMB   | chr5  | 98104998  | 98105329  |
| CNV | NM_001012761 | RGMB   | chr5  | 98106301  | 98106377  |
| CNV | NM_001012761 | RGMB   | chr5  | 98109656  | 98109910  |
| CNV | NM_001012761 | RGMB   | chr5  | 98115283  | 98115792  |
| CNV | NM_001012761 | RGMB   | chr5  | 98128788  | 98132198  |
| SMG | NM_002927    | RGS13  | chr1  | 192605267 | 192605447 |
| SMG | NM_002927    | RGS13  | chr1  | 192606719 | 192606790 |
| SMG | NM_002927    | RGS13  | chr1  | 192607293 | 192607333 |
| SMG | NM_002927    | RGS13  | chr1  | 192613460 | 192613529 |
| SMG | NM_002927    | RGS13  | chr1  | 192617055 | 192617117 |
| SMG | NM_002927    | RGS13  | chr1  | 192627330 | 192627497 |
| SMG | NM_002927    | RGS13  | chr1  | 192628467 | 192629440 |
| SMG | NM_001286673 | RGS20  | chr8  | 54764367  | 54764624  |
| SMG | NM_001286673 | RGS20  | chr8  | 54852135  | 54852284  |
| SMG | NM_001286673 | RGS20  | chr8  | 54859224  | 54859308  |
| SMG | NM_001286673 | RGS20  | chr8  | 54866635  | 54866870  |
| SMG | NM_001286673 | RGS20  | chr8  | 54870829  | 54871864  |
| SMG | NM_138328    | RHBDL3 | chr17 | 30593194  | 30593319  |
| SMG | NM_138328    | RHBDL3 | chr17 | 30594920  | 30594944  |
| SMG | NM_138328    | RHBDL3 | chr17 | 30611677  | 30611836  |



|     |              |        |       |          |          |
|-----|--------------|--------|-------|----------|----------|
| SMG | NM_138328    | RHBDL3 | chr17 | 30615810 | 30616035 |
| SMG | NM_138328    | RHBDL3 | chr17 | 30621312 | 30621461 |
| SMG | NM_138328    | RHBDL3 | chr17 | 30625110 | 30625223 |
| SMG | NM_138328    | RHBDL3 | chr17 | 30632359 | 30632460 |
| SMG | NM_138328    | RHBDL3 | chr17 | 30643250 | 30643311 |
| SMG | NM_138328    | RHBDL3 | chr17 | 30647976 | 30651680 |
| SMG | NM_001664    | RHOA   | chr3  | 49396578 | 49397815 |
| SMG | NM_001664    | RHOA   | chr3  | 49399928 | 49400059 |
| SMG | NM_001664    | RHOA   | chr3  | 49405860 | 49405981 |
| SMG | NM_001664    | RHOA   | chr3  | 49412866 | 49413024 |
| SMG | NM_001664    | RHOA   | chr3  | 49449252 | 49449526 |
| SMG | NM_001033566 | RHOT1  | chr17 | 30469472 | 30469748 |
| SMG | NM_001033566 | RHOT1  | chr17 | 30498061 | 30498120 |
| SMG | NM_001033566 | RHOT1  | chr17 | 30500849 | 30500931 |
| SMG | NM_001033566 | RHOT1  | chr17 | 30502337 | 30502381 |
| SMG | NM_001033566 | RHOT1  | chr17 | 30502980 | 30503034 |
| SMG | NM_001033566 | RHOT1  | chr17 | 30503179 | 30503232 |
| SMG | NM_001033566 | RHOT1  | chr17 | 30509775 | 30509884 |
| SMG | NM_001033566 | RHOT1  | chr17 | 30510189 | 30510291 |
| SMG | NM_001033566 | RHOT1  | chr17 | 30519219 | 30519318 |
| SMG | NM_001033566 | RHOT1  | chr17 | 30520154 | 30520263 |
| SMG | NM_001033566 | RHOT1  | chr17 | 30521005 | 30521126 |
| SMG | NM_001033566 | RHOT1  | chr17 | 30525965 | 30526050 |
| SMG | NM_001033566 | RHOT1  | chr17 | 30526423 | 30526569 |
| SMG | NM_001033566 | RHOT1  | chr17 | 30527974 | 30528075 |
| SMG | NM_001033566 | RHOT1  | chr17 | 30529788 | 30529919 |
| SMG | NM_001033566 | RHOT1  | chr17 | 30530908 | 30530992 |
| SMG | NM_001033566 | RHOT1  | chr17 | 30533928 | 30534048 |
| SMG | NM_001033566 | RHOT1  | chr17 | 30535125 | 30535328 |
| SMG | NM_001033566 | RHOT1  | chr17 | 30538134 | 30538257 |
| SMG | NM_001033566 | RHOT1  | chr17 | 30551634 | 30552746 |
| CNV | NM_001285439 | RICTOR | chr5  | 38938022 | 38942480 |
| CNV | NM_001285439 | RICTOR | chr5  | 38942934 | 38943073 |
| CNV | NM_001285439 | RICTOR | chr5  | 38944547 | 38944671 |
| CNV | NM_001285439 | RICTOR | chr5  | 38945014 | 38945170 |
| CNV | NM_001285439 | RICTOR | chr5  | 38945592 | 38945826 |
| CNV | NM_001285439 | RICTOR | chr5  | 38946569 | 38946654 |
| CNV | NM_001285439 | RICTOR | chr5  | 38947365 | 38947543 |
| CNV | NM_001285439 | RICTOR | chr5  | 38949457 | 38949529 |
| CNV | NM_001285439 | RICTOR | chr5  | 38949813 | 38950822 |
| CNV | NM_001285439 | RICTOR | chr5  | 38952297 | 38952527 |
| CNV | NM_001285439 | RICTOR | chr5  | 38953086 | 38953193 |
| CNV | NM_001285439 | RICTOR | chr5  | 38953562 | 38953655 |

|     |              |          |       |          |          |
|-----|--------------|----------|-------|----------|----------|
| CNV | NM_001285439 | RICTOR   | chr5  | 38954875 | 38954963 |
| CNV | NM_001285439 | RICTOR   | chr5  | 38955696 | 38955806 |
| CNV | NM_001285439 | RICTOR   | chr5  | 38957753 | 38957832 |
| CNV | NM_001285439 | RICTOR   | chr5  | 38958544 | 38958621 |
| CNV | NM_001285439 | RICTOR   | chr5  | 38958768 | 38958933 |
| CNV | NM_001285439 | RICTOR   | chr5  | 38959296 | 38959423 |
| CNV | NM_001285439 | RICTOR   | chr5  | 38959880 | 38960080 |
| CNV | NM_001285439 | RICTOR   | chr5  | 38960499 | 38960635 |
| CNV | NM_001285439 | RICTOR   | chr5  | 38962416 | 38962463 |
| CNV | NM_001285439 | RICTOR   | chr5  | 38962586 | 38962688 |
| CNV | NM_001285439 | RICTOR   | chr5  | 38962977 | 38963143 |
| CNV | NM_001285439 | RICTOR   | chr5  | 38964893 | 38964994 |
| CNV | NM_001285439 | RICTOR   | chr5  | 38966742 | 38966823 |
| CNV | NM_001285439 | RICTOR   | chr5  | 38967262 | 38967329 |
| CNV | NM_001285439 | RICTOR   | chr5  | 38967438 | 38967529 |
| CNV | NM_001285439 | RICTOR   | chr5  | 38968044 | 38968132 |
| CNV | NM_001285439 | RICTOR   | chr5  | 38971978 | 38972061 |
| CNV | NM_001285439 | RICTOR   | chr5  | 38975638 | 38975706 |
| CNV | NM_001285439 | RICTOR   | chr5  | 38978684 | 38978752 |
| CNV | NM_001285439 | RICTOR   | chr5  | 38981968 | 38982138 |
| CNV | NM_001285439 | RICTOR   | chr5  | 38991050 | 38991177 |
| CNV | NM_001285439 | RICTOR   | chr5  | 38996920 | 38996984 |
| CNV | NM_001285439 | RICTOR   | chr5  | 39002636 | 39002768 |
| CNV | NM_001285439 | RICTOR   | chr5  | 39003659 | 39003724 |
| CNV | NM_001285439 | RICTOR   | chr5  | 39021140 | 39021238 |
| CNV | NM_001285439 | RICTOR   | chr5  | 39074212 | 39074260 |
| CNV | NM_001285439 | RICTOR   | chr5  | 39074430 | 39074510 |
| CNV | NM_018343    | RIOK2    | chr5  | 96496570 | 96498929 |
| CNV | NM_018343    | RIOK2    | chr5  | 96500754 | 96500851 |
| CNV | NM_018343    | RIOK2    | chr5  | 96503170 | 96503695 |
| CNV | NM_018343    | RIOK2    | chr5  | 96504463 | 96504556 |
| CNV | NM_018343    | RIOK2    | chr5  | 96506909 | 96507101 |
| CNV | NM_018343    | RIOK2    | chr5  | 96508878 | 96508967 |
| CNV | NM_018343    | RIOK2    | chr5  | 96512819 | 96512995 |
| CNV | NM_018343    | RIOK2    | chr5  | 96513435 | 96513552 |
| CNV | NM_018343    | RIOK2    | chr5  | 96514758 | 96514897 |
| CNV | NM_018343    | RIOK2    | chr5  | 96518829 | 96519005 |
| CNV | NM_001142279 | RNASEH2B | chr13 | 51483813 | 51484276 |
| CNV | NM_001142279 | RNASEH2B | chr13 | 51501542 | 51501614 |
| CNV | NM_001142279 | RNASEH2B | chr13 | 51503610 | 51503718 |
| CNV | NM_001142279 | RNASEH2B | chr13 | 51504818 | 51504895 |
| CNV | NM_001142279 | RNASEH2B | chr13 | 51509020 | 51509135 |
| CNV | NM_001142279 | RNASEH2B | chr13 | 51517456 | 51517530 |

|     |              |          |       |           |           |
|-----|--------------|----------|-------|-----------|-----------|
| CNV | NM_001142279 | RNASEH2B | chr13 | 51519562  | 51519668  |
| CNV | NM_001142279 | RNASEH2B | chr13 | 51522122  | 51522204  |
| CNV | NM_001142279 | RNASEH2B | chr13 | 51523598  | 51523641  |
| CNV | NM_001142279 | RNASEH2B | chr13 | 51544067  | 51544596  |
| SMG | NM_020724    | RNF150   | chr4  | 141786724 | 141789533 |
| SMG | NM_020724    | RNF150   | chr4  | 141832297 | 141832508 |
| SMG | NM_020724    | RNF150   | chr4  | 141847130 | 141847227 |
| SMG | NM_020724    | RNF150   | chr4  | 141868807 | 141868890 |
| SMG | NM_020724    | RNF150   | chr4  | 141870454 | 141870526 |
| SMG | NM_020724    | RNF150   | chr4  | 141888776 | 141889027 |
| SMG | NM_020724    | RNF150   | chr4  | 142053478 | 142054616 |
| SMG | NM_001184993 | RNF17    | chr13 | 25338300  | 25338471  |
| SMG | NM_001184993 | RNF17    | chr13 | 25341409  | 25341504  |
| SMG | NM_001184993 | RNF17    | chr13 | 25348950  | 25349042  |
| SMG | NM_001184993 | RNF17    | chr13 | 25352432  | 25352544  |
| SMG | NM_001184993 | RNF17    | chr13 | 25353804  | 25353885  |
| SMG | NM_001184993 | RNF17    | chr13 | 25355981  | 25356082  |
| SMG | NM_001184993 | RNF17    | chr13 | 25362125  | 25362297  |
| SMG | NM_001184993 | RNF17    | chr13 | 25363485  | 25363562  |
| SMG | NM_001184993 | RNF17    | chr13 | 25363835  | 25363910  |
| SMG | NM_001184993 | RNF17    | chr13 | 25367179  | 25367484  |
| SMG | NM_001184993 | RNF17    | chr13 | 25370274  | 25370433  |
| SMG | NM_001184993 | RNF17    | chr13 | 25373532  | 25373722  |
| SMG | NM_001184993 | RNF17    | chr13 | 25374503  | 25374672  |
| SMG | NM_001184993 | RNF17    | chr13 | 25376518  | 25376709  |
| SMG | NM_001184993 | RNF17    | chr13 | 25378425  | 25378567  |
| SMG | NM_001184993 | RNF17    | chr13 | 25399756  | 25399910  |
| SMG | NM_001184993 | RNF17    | chr13 | 25404621  | 25404737  |
| SMG | NM_001184993 | RNF17    | chr13 | 25405995  | 25406116  |
| SMG | NM_001184993 | RNF17    | chr13 | 25416178  | 25416299  |
| SMG | NM_001184993 | RNF17    | chr13 | 25417881  | 25418109  |
| SMG | NM_001184993 | RNF17    | chr13 | 25418789  | 25418940  |
| SMG | NM_001184993 | RNF17    | chr13 | 25419098  | 25419217  |
| SMG | NM_001184993 | RNF17    | chr13 | 25424478  | 25424569  |
| SMG | NM_001184993 | RNF17    | chr13 | 25425593  | 25425709  |
| SMG | NM_001184993 | RNF17    | chr13 | 25427992  | 25428282  |
| SMG | NM_001184993 | RNF17    | chr13 | 25433138  | 25433302  |
| SMG | NM_001184993 | RNF17    | chr13 | 25435405  | 25435525  |
| SMG | NM_001184993 | RNF17    | chr13 | 25436850  | 25436931  |
| SMG | NM_001184993 | RNF17    | chr13 | 25439010  | 25439136  |
| SMG | NM_001184993 | RNF17    | chr13 | 25440281  | 25440341  |
| SMG | NM_001184993 | RNF17    | chr13 | 25442737  | 25442854  |
| SMG | NM_001184993 | RNF17    | chr13 | 25444708  | 25444877  |

|     |              |       |       |           |           |
|-----|--------------|-------|-------|-----------|-----------|
| SMG | NM_001184993 | RNF17 | chr13 | 25448251  | 25448387  |
| SMG | NM_001184993 | RNF17 | chr13 | 25451134  | 25451324  |
| SMG | NM_001184993 | RNF17 | chr13 | 25453324  | 25453433  |
| SMG | NM_001184993 | RNF17 | chr13 | 25453874  | 25454058  |
| DRV | NM_017763    | RNF43 | chr17 | 56431037  | 56432347  |
| DRV | NM_017763    | RNF43 | chr17 | 56434828  | 56436184  |
| DRV | NM_017763    | RNF43 | chr17 | 56437509  | 56437612  |
| DRV | NM_017763    | RNF43 | chr17 | 56438143  | 56438305  |
| DRV | NM_017763    | RNF43 | chr17 | 56439904  | 56440009  |
| DRV | NM_017763    | RNF43 | chr17 | 56440635  | 56440767  |
| DRV | NM_017763    | RNF43 | chr17 | 56440886  | 56440961  |
| DRV | NM_017763    | RNF43 | chr17 | 56448271  | 56448394  |
| DRV | NM_017763    | RNF43 | chr17 | 56492686  | 56493323  |
| DRV | NM_017763    | RNF43 | chr17 | 56494377  | 56494931  |
| SMG | NM_203288    | RP9   | chr7  | 33134409  | 33135044  |
| SMG | NM_203288    | RP9   | chr7  | 33136104  | 33136166  |
| SMG | NM_203288    | RP9   | chr7  | 33136882  | 33136974  |
| SMG | NM_203288    | RP9   | chr7  | 33138918  | 33139048  |
| SMG | NM_203288    | RP9   | chr7  | 33140142  | 33140173  |
| SMG | NM_203288    | RP9   | chr7  | 33148832  | 33149002  |
| SMG | NM_024813    | RPAP2 | chr1  | 92764521  | 92764703  |
| SMG | NM_024813    | RPAP2 | chr1  | 92765750  | 92765796  |
| SMG | NM_024813    | RPAP2 | chr1  | 92767032  | 92767147  |
| SMG | NM_024813    | RPAP2 | chr1  | 92769533  | 92769632  |
| SMG | NM_024813    | RPAP2 | chr1  | 92769840  | 92769906  |
| SMG | NM_024813    | RPAP2 | chr1  | 92772744  | 92772833  |
| SMG | NM_024813    | RPAP2 | chr1  | 92786155  | 92786191  |
| SMG | NM_024813    | RPAP2 | chr1  | 92789001  | 92789932  |
| SMG | NM_024813    | RPAP2 | chr1  | 92798947  | 92799030  |
| SMG | NM_024813    | RPAP2 | chr1  | 92801903  | 92801984  |
| SMG | NM_024813    | RPAP2 | chr1  | 92811402  | 92811471  |
| SMG | NM_024813    | RPAP2 | chr1  | 92846280  | 92846430  |
| SMG | NM_024813    | RPAP2 | chr1  | 92852567  | 92853732  |
| SMG | NM_000970    | RPL6  | chr12 | 112842993 | 112843180 |
| SMG | NM_000970    | RPL6  | chr12 | 112843656 | 112843841 |
| SMG | NM_000970    | RPL6  | chr12 | 112844097 | 112844146 |
| SMG | NM_000970    | RPL6  | chr12 | 112844550 | 112844694 |
| SMG | NM_000970    | RPL6  | chr12 | 112846043 | 112846142 |
| SMG | NM_000970    | RPL6  | chr12 | 112846223 | 112846460 |
| SMG | NM_000970    | RPL6  | chr12 | 112847390 | 112847443 |
| SMG | NM_001025    | RPS23 | chr5  | 81569138  | 81572074  |
| SMG | NM_001025    | RPS23 | chr5  | 81572216  | 81572337  |
| SMG | NM_001025    | RPS23 | chr5  | 81573511  | 81573671  |

|     |              |         |       |          |          |
|-----|--------------|---------|-------|----------|----------|
| SMG | NM_001025    | RPS23   | chr5  | 81574138 | 81574235 |
| SMG | NM_001134405 | RUNDC3B | chr7  | 87257728 | 87258261 |
| SMG | NM_001134405 | RUNDC3B | chr7  | 87280137 | 87280253 |
| SMG | NM_001134405 | RUNDC3B | chr7  | 87329736 | 87329870 |
| SMG | NM_001134405 | RUNDC3B | chr7  | 87339885 | 87339971 |
| SMG | NM_001134405 | RUNDC3B | chr7  | 87369106 | 87369196 |
| SMG | NM_001134405 | RUNDC3B | chr7  | 87370814 | 87370895 |
| SMG | NM_001134405 | RUNDC3B | chr7  | 87399896 | 87400065 |
| SMG | NM_001134405 | RUNDC3B | chr7  | 87407113 | 87407271 |
| SMG | NM_001134405 | RUNDC3B | chr7  | 87436687 | 87436834 |
| SMG | NM_001134405 | RUNDC3B | chr7  | 87445455 | 87445577 |
| SMG | NM_001134405 | RUNDC3B | chr7  | 87459199 | 87461613 |
| LIT | NM_001198625 | RUNX1T1 | chr8  | 92967194 | 92972745 |
| LIT | NM_001198625 | RUNX1T1 | chr8  | 92982885 | 92983076 |
| LIT | NM_001198625 | RUNX1T1 | chr8  | 92988132 | 92988201 |
| LIT | NM_001198625 | RUNX1T1 | chr8  | 92998351 | 92998553 |
| LIT | NM_001198625 | RUNX1T1 | chr8  | 92999114 | 92999200 |
| LIT | NM_001198625 | RUNX1T1 | chr8  | 93003866 | 93004117 |
| LIT | NM_001198625 | RUNX1T1 | chr8  | 93017343 | 93017525 |
| LIT | NM_001198625 | RUNX1T1 | chr8  | 93023229 | 93023319 |
| LIT | NM_001198625 | RUNX1T1 | chr8  | 93026806 | 93027048 |
| LIT | NM_001198625 | RUNX1T1 | chr8  | 93029453 | 93029591 |
| LIT | NM_001198625 | RUNX1T1 | chr8  | 93074773 | 93074855 |
| LIT | NM_001198625 | RUNX1T1 | chr8  | 93088192 | 93088365 |
| LIT | NM_001198625 | RUNX1T1 | chr8  | 93093461 | 93093521 |
| LIT | NM_001198625 | RUNX1T1 | chr8  | 93107255 | 93107399 |
| LIT | NM_001198625 | RUNX1T1 | chr8  | 93107574 | 93107882 |
| SMG | NM_016940    | RWDD2B  | chr21 | 30378079 | 30378972 |
| SMG | NM_016940    | RWDD2B  | chr21 | 30380081 | 30380444 |
| SMG | NM_016940    | RWDD2B  | chr21 | 30380560 | 30380628 |
| SMG | NM_016940    | RWDD2B  | chr21 | 30380715 | 30380942 |
| SMG | NM_016940    | RWDD2B  | chr21 | 30391531 | 30391685 |
| LIT | NM_001036    | RYR3    | chr15 | 33603176 | 33603297 |
| LIT | NM_001036    | RYR3    | chr15 | 33765619 | 33765739 |
| LIT | NM_001036    | RYR3    | chr15 | 33795831 | 33795939 |
| LIT | NM_001036    | RYR3    | chr15 | 33822792 | 33822867 |
| LIT | NM_001036    | RYR3    | chr15 | 33825511 | 33825590 |
| LIT | NM_001036    | RYR3    | chr15 | 33831550 | 33831663 |
| LIT | NM_001036    | RYR3    | chr15 | 33832991 | 33833091 |
| LIT | NM_001036    | RYR3    | chr15 | 33835822 | 33835916 |
| LIT | NM_001036    | RYR3    | chr15 | 33840330 | 33840405 |
| LIT | NM_001036    | RYR3    | chr15 | 33842360 | 33842517 |
| LIT | NM_001036    | RYR3    | chr15 | 33855037 | 33855211 |

|     |           |      |       |          |          |
|-----|-----------|------|-------|----------|----------|
| LIT | NM_001036 | RYR3 | chr15 | 33858878 | 33859000 |
| LIT | NM_001036 | RYR3 | chr15 | 33872176 | 33872345 |
| LIT | NM_001036 | RYR3 | chr15 | 33873708 | 33873844 |
| LIT | NM_001036 | RYR3 | chr15 | 33876595 | 33876691 |
| LIT | NM_001036 | RYR3 | chr15 | 33878198 | 33878317 |
| LIT | NM_001036 | RYR3 | chr15 | 33893619 | 33893753 |
| LIT | NM_001036 | RYR3 | chr15 | 33895323 | 33895565 |
| LIT | NM_001036 | RYR3 | chr15 | 33905383 | 33905576 |
| LIT | NM_001036 | RYR3 | chr15 | 33916007 | 33916224 |
| LIT | NM_001036 | RYR3 | chr15 | 33920671 | 33920776 |
| LIT | NM_001036 | RYR3 | chr15 | 33922140 | 33922244 |
| LIT | NM_001036 | RYR3 | chr15 | 33923410 | 33923494 |
| LIT | NM_001036 | RYR3 | chr15 | 33925149 | 33925309 |
| LIT | NM_001036 | RYR3 | chr15 | 33926786 | 33926934 |
| LIT | NM_001036 | RYR3 | chr15 | 33927814 | 33928020 |
| LIT | NM_001036 | RYR3 | chr15 | 33928576 | 33928751 |
| LIT | NM_001036 | RYR3 | chr15 | 33936511 | 33936720 |
| LIT | NM_001036 | RYR3 | chr15 | 33938551 | 33938727 |
| LIT | NM_001036 | RYR3 | chr15 | 33939624 | 33939661 |
| LIT | NM_001036 | RYR3 | chr15 | 33941272 | 33941436 |
| LIT | NM_001036 | RYR3 | chr15 | 33944918 | 33945084 |
| LIT | NM_001036 | RYR3 | chr15 | 33951920 | 33952007 |
| LIT | NM_001036 | RYR3 | chr15 | 33952397 | 33952624 |
| LIT | NM_001036 | RYR3 | chr15 | 33954353 | 33955149 |
| LIT | NM_001036 | RYR3 | chr15 | 33955737 | 33955938 |
| LIT | NM_001036 | RYR3 | chr15 | 33961554 | 33961657 |
| LIT | NM_001036 | RYR3 | chr15 | 33962619 | 33962757 |
| LIT | NM_001036 | RYR3 | chr15 | 33988418 | 33988692 |
| LIT | NM_001036 | RYR3 | chr15 | 33990082 | 33990197 |
| LIT | NM_001036 | RYR3 | chr15 | 33991904 | 33992034 |
| LIT | NM_001036 | RYR3 | chr15 | 33993177 | 33993281 |
| LIT | NM_001036 | RYR3 | chr15 | 33999119 | 33999255 |
| LIT | NM_001036 | RYR3 | chr15 | 34014915 | 34015096 |
| LIT | NM_001036 | RYR3 | chr15 | 34016265 | 34016377 |
| LIT | NM_001036 | RYR3 | chr15 | 34018586 | 34018707 |
| LIT | NM_001036 | RYR3 | chr15 | 34021057 | 34021227 |
| LIT | NM_001036 | RYR3 | chr15 | 34023674 | 34023895 |
| LIT | NM_001036 | RYR3 | chr15 | 34028435 | 34028526 |
| LIT | NM_001036 | RYR3 | chr15 | 34030650 | 34030791 |
| LIT | NM_001036 | RYR3 | chr15 | 34032032 | 34032196 |
| LIT | NM_001036 | RYR3 | chr15 | 34034566 | 34034645 |
| LIT | NM_001036 | RYR3 | chr15 | 34038268 | 34038358 |
| LIT | NM_001036 | RYR3 | chr15 | 34040314 | 34040461 |

|     |           |      |       |          |          |
|-----|-----------|------|-------|----------|----------|
| LIT | NM_001036 | RYR3 | chr15 | 34040668 | 34040731 |
| LIT | NM_001036 | RYR3 | chr15 | 34042179 | 34042255 |
| LIT | NM_001036 | RYR3 | chr15 | 34042363 | 34042487 |
| LIT | NM_001036 | RYR3 | chr15 | 34047265 | 34047381 |
| LIT | NM_001036 | RYR3 | chr15 | 34048506 | 34048574 |
| LIT | NM_001036 | RYR3 | chr15 | 34049675 | 34049797 |
| LIT | NM_001036 | RYR3 | chr15 | 34060858 | 34060908 |
| LIT | NM_001036 | RYR3 | chr15 | 34061312 | 34061373 |
| LIT | NM_001036 | RYR3 | chr15 | 34064120 | 34064359 |
| LIT | NM_001036 | RYR3 | chr15 | 34065734 | 34065816 |
| LIT | NM_001036 | RYR3 | chr15 | 34072411 | 34072542 |
| LIT | NM_001036 | RYR3 | chr15 | 34077862 | 34078183 |
| LIT | NM_001036 | RYR3 | chr15 | 34080418 | 34080659 |
| LIT | NM_001036 | RYR3 | chr15 | 34092970 | 34093058 |
| LIT | NM_001036 | RYR3 | chr15 | 34094069 | 34094162 |
| LIT | NM_001036 | RYR3 | chr15 | 34099755 | 34099770 |
| LIT | NM_001036 | RYR3 | chr15 | 34102679 | 34102850 |
| LIT | NM_001036 | RYR3 | chr15 | 34103178 | 34103238 |
| LIT | NM_001036 | RYR3 | chr15 | 34105063 | 34105195 |
| LIT | NM_001036 | RYR3 | chr15 | 34105667 | 34105780 |
| LIT | NM_001036 | RYR3 | chr15 | 34109062 | 34109159 |
| LIT | NM_001036 | RYR3 | chr15 | 34110778 | 34110885 |
| LIT | NM_001036 | RYR3 | chr15 | 34111956 | 34112008 |
| LIT | NM_001036 | RYR3 | chr15 | 34112956 | 34113013 |
| LIT | NM_001036 | RYR3 | chr15 | 34113470 | 34113570 |
| LIT | NM_001036 | RYR3 | chr15 | 34113723 | 34113803 |
| LIT | NM_001036 | RYR3 | chr15 | 34115196 | 34115273 |
| LIT | NM_001036 | RYR3 | chr15 | 34117803 | 34117877 |
| LIT | NM_001036 | RYR3 | chr15 | 34118452 | 34118470 |
| LIT | NM_001036 | RYR3 | chr15 | 34118872 | 34118953 |
| LIT | NM_001036 | RYR3 | chr15 | 34119399 | 34119488 |
| LIT | NM_001036 | RYR3 | chr15 | 34123163 | 34123292 |
| LIT | NM_001036 | RYR3 | chr15 | 34127168 | 34127273 |
| LIT | NM_001036 | RYR3 | chr15 | 34129106 | 34129188 |
| LIT | NM_001036 | RYR3 | chr15 | 34129831 | 34131159 |
| LIT | NM_001036 | RYR3 | chr15 | 34133025 | 34133084 |
| LIT | NM_001036 | RYR3 | chr15 | 34134064 | 34134236 |
| LIT | NM_001036 | RYR3 | chr15 | 34135688 | 34135775 |
| LIT | NM_001036 | RYR3 | chr15 | 34137062 | 34137263 |
| LIT | NM_001036 | RYR3 | chr15 | 34140491 | 34140622 |
| LIT | NM_001036 | RYR3 | chr15 | 34145245 | 34145288 |
| LIT | NM_001036 | RYR3 | chr15 | 34145755 | 34145883 |
| LIT | NM_001036 | RYR3 | chr15 | 34146589 | 34146650 |

|     |              |        |       |          |          |
|-----|--------------|--------|-------|----------|----------|
| LIT | NM_001036    | RYR3   | chr15 | 34146966 | 34147113 |
| LIT | NM_001036    | RYR3   | chr15 | 34149980 | 34150115 |
| LIT | NM_001036    | RYR3   | chr15 | 34151775 | 34151932 |
| LIT | NM_001036    | RYR3   | chr15 | 34152795 | 34152860 |
| LIT | NM_001036    | RYR3   | chr15 | 34153278 | 34153379 |
| LIT | NM_001036    | RYR3   | chr15 | 34156338 | 34156390 |
| LIT | NM_001036    | RYR3   | chr15 | 34157331 | 34158303 |
| CNV | NM_002968    | SALL1  | chr16 | 51169885 | 51171459 |
| CNV | NM_002968    | SALL1  | chr16 | 51172594 | 51176056 |
| CNV | NM_002968    | SALL1  | chr16 | 51185076 | 51185183 |
| SMG | NM_015589    | SAMD4A | chr14 | 55034329 | 55034830 |
| SMG | NM_015589    | SAMD4A | chr14 | 55168779 | 55169298 |
| SMG | NM_015589    | SAMD4A | chr14 | 55203741 | 55204005 |
| SMG | NM_015589    | SAMD4A | chr14 | 55215532 | 55215642 |
| SMG | NM_015589    | SAMD4A | chr14 | 55218168 | 55218255 |
| SMG | NM_015589    | SAMD4A | chr14 | 55226878 | 55227212 |
| SMG | NM_015589    | SAMD4A | chr14 | 55231172 | 55231258 |
| SMG | NM_015589    | SAMD4A | chr14 | 55236821 | 55236940 |
| SMG | NM_015589    | SAMD4A | chr14 | 55241651 | 55241853 |
| SMG | NM_015589    | SAMD4A | chr14 | 55243131 | 55243258 |
| SMG | NM_015589    | SAMD4A | chr14 | 55251254 | 55251338 |
| SMG | NM_015589    | SAMD4A | chr14 | 55255633 | 55260033 |
| CNV | NM_001256370 | SAMSN1 | chr21 | 15857548 | 15858435 |
| CNV | NM_001256370 | SAMSN1 | chr21 | 15870762 | 15870913 |
| CNV | NM_001256370 | SAMSN1 | chr21 | 15872849 | 15873056 |
| CNV | NM_001256370 | SAMSN1 | chr21 | 15882630 | 15882782 |
| CNV | NM_001256370 | SAMSN1 | chr21 | 15884764 | 15884894 |
| CNV | NM_001256370 | SAMSN1 | chr21 | 15889212 | 15889362 |
| CNV | NM_001256370 | SAMSN1 | chr21 | 15893470 | 15893542 |
| CNV | NM_001256370 | SAMSN1 | chr21 | 15954456 | 15954809 |
| CNV | NM_001256370 | SAMSN1 | chr21 | 15955640 | 15955723 |
| SMG | NM_002970    | SAT1   | chrX  | 23801274 | 23801534 |
| SMG | NM_002970    | SAT1   | chrX  | 23801774 | 23801826 |
| SMG | NM_002970    | SAT1   | chrX  | 23801916 | 23802000 |
| SMG | NM_002970    | SAT1   | chrX  | 23803444 | 23803546 |
| SMG | NM_002970    | SAT1   | chrX  | 23803636 | 23803677 |
| SMG | NM_002970    | SAT1   | chrX  | 23803802 | 23804327 |
| CNV | NM_001131010 | SATB1  | chr3  | 18389132 | 18391174 |
| CNV | NM_001131010 | SATB1  | chr3  | 18393483 | 18393687 |
| CNV | NM_001131010 | SATB1  | chr3  | 18419661 | 18419817 |
| CNV | NM_001131010 | SATB1  | chr3  | 18427890 | 18428103 |
| CNV | NM_001131010 | SATB1  | chr3  | 18435953 | 18436408 |
| CNV | NM_001131010 | SATB1  | chr3  | 18438670 | 18438782 |



|     |              |        |       |          |          |
|-----|--------------|--------|-------|----------|----------|
| CNV | NM_001131010 | SATB1  | chr3  | 18456602 | 18456726 |
| CNV | NM_001131010 | SATB1  | chr3  | 18457498 | 18457625 |
| CNV | NM_001131010 | SATB1  | chr3  | 18458393 | 18458570 |
| CNV | NM_001131010 | SATB1  | chr3  | 18462248 | 18462483 |
| CNV | NM_001131010 | SATB1  | chr3  | 18480056 | 18480265 |
| CNV | NM_014963    | SBNO2  | chr19 | 1107632  | 1108703  |
| CNV | NM_014963    | SBNO2  | chr19 | 1108777  | 1108968  |
| CNV | NM_014963    | SBNO2  | chr19 | 1109133  | 1109210  |
| CNV | NM_014963    | SBNO2  | chr19 | 1109290  | 1109422  |
| CNV | NM_014963    | SBNO2  | chr19 | 1109504  | 1109597  |
| CNV | NM_014963    | SBNO2  | chr19 | 1109681  | 1109776  |
| CNV | NM_014963    | SBNO2  | chr19 | 1110743  | 1110887  |
| CNV | NM_014963    | SBNO2  | chr19 | 1111017  | 1111092  |
| CNV | NM_014963    | SBNO2  | chr19 | 1111504  | 1111613  |
| CNV | NM_014963    | SBNO2  | chr19 | 1111994  | 1112066  |
| CNV | NM_014963    | SBNO2  | chr19 | 1112187  | 1112300  |
| CNV | NM_014963    | SBNO2  | chr19 | 1112400  | 1112536  |
| CNV | NM_014963    | SBNO2  | chr19 | 1112816  | 1112948  |
| CNV | NM_014963    | SBNO2  | chr19 | 1113533  | 1113703  |
| CNV | NM_014963    | SBNO2  | chr19 | 1114229  | 1114421  |
| CNV | NM_014963    | SBNO2  | chr19 | 1116019  | 1116102  |
| CNV | NM_014963    | SBNO2  | chr19 | 1116827  | 1116925  |
| CNV | NM_014963    | SBNO2  | chr19 | 1117321  | 1117498  |
| CNV | NM_014963    | SBNO2  | chr19 | 1119009  | 1119163  |
| CNV | NM_014963    | SBNO2  | chr19 | 1119514  | 1119620  |
| CNV | NM_014963    | SBNO2  | chr19 | 1119904  | 1120022  |
| CNV | NM_014963    | SBNO2  | chr19 | 1122137  | 1122281  |
| CNV | NM_014963    | SBNO2  | chr19 | 1122466  | 1122557  |
| CNV | NM_014963    | SBNO2  | chr19 | 1122656  | 1122790  |
| CNV | NM_014963    | SBNO2  | chr19 | 1122892  | 1123044  |
| CNV | NM_014963    | SBNO2  | chr19 | 1123532  | 1123638  |
| CNV | NM_014963    | SBNO2  | chr19 | 1123940  | 1124021  |
| CNV | NM_014963    | SBNO2  | chr19 | 1127602  | 1127764  |
| CNV | NM_014963    | SBNO2  | chr19 | 1147307  | 1147419  |
| CNV | NM_014963    | SBNO2  | chr19 | 1149367  | 1149441  |
| CNV | NM_014963    | SBNO2  | chr19 | 1154182  | 1154401  |
| CNV | NM_014963    | SBNO2  | chr19 | 1174170  | 1174282  |
| CNV | NM_079834    | SCAMP4 | chr19 | 1905372  | 1905438  |
| CNV | NM_079834    | SCAMP4 | chr19 | 1914977  | 1915025  |
| CNV | NM_079834    | SCAMP4 | chr19 | 1917692  | 1917821  |
| CNV | NM_079834    | SCAMP4 | chr19 | 1918125  | 1918282  |
| CNV | NM_079834    | SCAMP4 | chr19 | 1918887  | 1918989  |
| CNV | NM_079834    | SCAMP4 | chr19 | 1923068  | 1923186  |

|     |              |         |       |           |           |
|-----|--------------|---------|-------|-----------|-----------|
| CNV | NM_079834    | SCAMP4  | chr19 | 1924106   | 1926012   |
| SMG | NM_052863    | SCGB3A1 | chr5  | 180017104 | 180017254 |
| SMG | NM_052863    | SCGB3A1 | chr5  | 180017599 | 180017838 |
| SMG | NM_052863    | SCGB3A1 | chr5  | 180018410 | 180018487 |
| CNV | NM_001202435 | SCN1A   | chr2  | 166845669 | 166848932 |
| CNV | NM_001202435 | SCN1A   | chr2  | 166850655 | 166850926 |
| CNV | NM_001202435 | SCN1A   | chr2  | 166852522 | 166852627 |
| CNV | NM_001202435 | SCN1A   | chr2  | 166854547 | 166854685 |
| CNV | NM_001202435 | SCN1A   | chr2  | 166856232 | 166856286 |
| CNV | NM_001202435 | SCN1A   | chr2  | 166858981 | 166859263 |
| CNV | NM_001202435 | SCN1A   | chr2  | 166866228 | 166866351 |
| CNV | NM_001202435 | SCN1A   | chr2  | 166868618 | 166868792 |
| CNV | NM_001202435 | SCN1A   | chr2  | 166870253 | 166870408 |
| CNV | NM_001202435 | SCN1A   | chr2  | 166872116 | 166872237 |
| CNV | NM_001202435 | SCN1A   | chr2  | 166892557 | 166893040 |
| CNV | NM_001202435 | SCN1A   | chr2  | 166894285 | 166894642 |
| CNV | NM_001202435 | SCN1A   | chr2  | 166895932 | 166896106 |
| CNV | NM_001202435 | SCN1A   | chr2  | 166897740 | 166897979 |
| CNV | NM_001202435 | SCN1A   | chr2  | 166898801 | 166898934 |
| CNV | NM_001202435 | SCN1A   | chr2  | 166900178 | 166900559 |
| CNV | NM_001202435 | SCN1A   | chr2  | 166901552 | 166901837 |
| CNV | NM_001202435 | SCN1A   | chr2  | 166903279 | 166903486 |
| CNV | NM_001202435 | SCN1A   | chr2  | 166904136 | 166904278 |
| CNV | NM_001202435 | SCN1A   | chr2  | 166905395 | 166905459 |
| CNV | NM_001202435 | SCN1A   | chr2  | 166908228 | 166908498 |
| CNV | NM_001202435 | SCN1A   | chr2  | 166909361 | 166909453 |
| CNV | NM_001202435 | SCN1A   | chr2  | 166911147 | 166911276 |
| CNV | NM_001202435 | SCN1A   | chr2  | 166912920 | 166913008 |
| CNV | NM_001202435 | SCN1A   | chr2  | 166915077 | 166915198 |
| CNV | NM_001202435 | SCN1A   | chr2  | 166929867 | 166930180 |
| CNV | NM_001202435 | SCN1A   | chr2  | 166934219 | 166934311 |
| CNV | NM_001202435 | SCN1A   | chr2  | 167005556 | 167005642 |
| CNV | NM_001081676 | SCN3A   | chr2  | 165944029 | 165947855 |
| CNV | NM_001081676 | SCN3A   | chr2  | 165948763 | 165949034 |
| CNV | NM_001081676 | SCN3A   | chr2  | 165950883 | 165950988 |
| CNV | NM_001081676 | SCN3A   | chr2  | 165952020 | 165952158 |
| CNV | NM_001081676 | SCN3A   | chr2  | 165952976 | 165953030 |
| CNV | NM_001081676 | SCN3A   | chr2  | 165953761 | 165954034 |
| CNV | NM_001081676 | SCN3A   | chr2  | 165956811 | 165956934 |
| CNV | NM_001081676 | SCN3A   | chr2  | 165969394 | 165969568 |
| CNV | NM_001081676 | SCN3A   | chr2  | 165970325 | 165970480 |
| CNV | NM_001081676 | SCN3A   | chr2  | 165971964 | 165972085 |
| CNV | NM_001081676 | SCN3A   | chr2  | 165984140 | 165984611 |

|     |              |        |       |           |           |
|-----|--------------|--------|-------|-----------|-----------|
| CNV | NM_001081676 | SCN3A  | chr2  | 165986449 | 165986806 |
| CNV | NM_001081676 | SCN3A  | chr2  | 165987753 | 165987927 |
| CNV | NM_001081676 | SCN3A  | chr2  | 165994388 | 165994627 |
| CNV | NM_001081676 | SCN3A  | chr2  | 165995985 | 165996118 |
| CNV | NM_001081676 | SCN3A  | chr2  | 165997307 | 165997508 |
| CNV | NM_001081676 | SCN3A  | chr2  | 166003248 | 166003539 |
| CNV | NM_001081676 | SCN3A  | chr2  | 166010961 | 166011168 |
| CNV | NM_001081676 | SCN3A  | chr2  | 166012271 | 166012413 |
| CNV | NM_001081676 | SCN3A  | chr2  | 166018817 | 166018881 |
| CNV | NM_001081676 | SCN3A  | chr2  | 166019065 | 166019338 |
| CNV | NM_001081676 | SCN3A  | chr2  | 166020127 | 166020219 |
| CNV | NM_001081676 | SCN3A  | chr2  | 166020901 | 166021030 |
| CNV | NM_001081676 | SCN3A  | chr2  | 166025245 | 166025335 |
| CNV | NM_001081676 | SCN3A  | chr2  | 166026939 | 166027058 |
| CNV | NM_001081676 | SCN3A  | chr2  | 166032640 | 166032954 |
| CNV | NM_001081676 | SCN3A  | chr2  | 166043060 | 166043257 |
| CNV | NM_001081676 | SCN3A  | chr2  | 166060332 | 166060577 |
| LIT | NM_001040151 | SCN3B  | chr11 | 123499894 | 123504484 |
| LIT | NM_001040151 | SCN3B  | chr11 | 123504828 | 123504914 |
| LIT | NM_001040151 | SCN3B  | chr11 | 123508893 | 123509032 |
| LIT | NM_001040151 | SCN3B  | chr11 | 123513153 | 123513379 |
| LIT | NM_001040151 | SCN3B  | chr11 | 123516294 | 123516458 |
| LIT | NM_001040151 | SCN3B  | chr11 | 123524454 | 123524534 |
| LIT | NM_001040151 | SCN3B  | chr11 | 123524933 | 123525315 |
| SMG | NM_001271594 | SESN3  | chr11 | 94898676  | 94906505  |
| SMG | NM_001271594 | SESN3  | chr11 | 94908661  | 94908806  |
| SMG | NM_001271594 | SESN3  | chr11 | 94910882  | 94911073  |
| SMG | NM_001271594 | SESN3  | chr11 | 94911873  | 94911992  |
| SMG | NM_001271594 | SESN3  | chr11 | 94917583  | 94917758  |
| SMG | NM_001271594 | SESN3  | chr11 | 94918419  | 94918656  |
| SMG | NM_001271594 | SESN3  | chr11 | 94924567  | 94924765  |
| SMG | NM_001271594 | SESN3  | chr11 | 94926620  | 94926686  |
| SMG | NM_001271594 | SESN3  | chr11 | 94965320  | 94965705  |
| DRV | NM_015559    | SETBP1 | chr18 | 42260862  | 42260986  |
| DRV | NM_015559    | SETBP1 | chr18 | 42281139  | 42281797  |
| DRV | NM_015559    | SETBP1 | chr18 | 42449194  | 42449248  |
| DRV | NM_015559    | SETBP1 | chr18 | 42529845  | 42533305  |
| DRV | NM_015559    | SETBP1 | chr18 | 42618449  | 42618620  |
| DRV | NM_015559    | SETBP1 | chr18 | 42643043  | 42648475  |
| SMG | NM_004630    | SF1    | chr11 | 64532075  | 64533627  |
| SMG | NM_004630    | SF1    | chr11 | 64534371  | 64534551  |
| SMG | NM_004630    | SF1    | chr11 | 64534663  | 64534723  |
| SMG | NM_004630    | SF1    | chr11 | 64535042  | 64535316  |

|     |              |          |       |           |           |
|-----|--------------|----------|-------|-----------|-----------|
| SMG | NM_004630    | SF1      | chr11 | 64535577  | 64535758  |
| SMG | NM_004630    | SF1      | chr11 | 64536493  | 64536601  |
| SMG | NM_004630    | SF1      | chr11 | 64536694  | 64536810  |
| SMG | NM_004630    | SF1      | chr11 | 64536897  | 64537081  |
| SMG | NM_004630    | SF1      | chr11 | 64537435  | 64537525  |
| SMG | NM_004630    | SF1      | chr11 | 64537727  | 64537880  |
| SMG | NM_004630    | SF1      | chr11 | 64540901  | 64540977  |
| SMG | NM_004630    | SF1      | chr11 | 64543969  | 64544098  |
| SMG | NM_004630    | SF1      | chr11 | 64545833  | 64546316  |
| SMG | NM_005066    | SFPQ     | chr1  | 35649200  | 35650194  |
| SMG | NM_005066    | SFPQ     | chr1  | 35652601  | 35652723  |
| SMG | NM_005066    | SFPQ     | chr1  | 35652803  | 35652852  |
| SMG | NM_005066    | SFPQ     | chr1  | 35653573  | 35653691  |
| SMG | NM_005066    | SFPQ     | chr1  | 35654603  | 35654688  |
| SMG | NM_005066    | SFPQ     | chr1  | 35654786  | 35654983  |
| SMG | NM_005066    | SFPQ     | chr1  | 35656098  | 35656194  |
| SMG | NM_005066    | SFPQ     | chr1  | 35656294  | 35656596  |
| SMG | NM_005066    | SFPQ     | chr1  | 35656941  | 35657130  |
| SMG | NM_005066    | SFPQ     | chr1  | 35657822  | 35658743  |
| CNV | NM_207372    | SH2D4B   | chr10 | 82297657  | 82298271  |
| CNV | NM_207372    | SH2D4B   | chr10 | 82329909  | 82330072  |
| CNV | NM_207372    | SH2D4B   | chr10 | 82331186  | 82331334  |
| CNV | NM_207372    | SH2D4B   | chr10 | 82348385  | 82348533  |
| CNV | NM_207372    | SH2D4B   | chr10 | 82363334  | 82363551  |
| CNV | NM_207372    | SH2D4B   | chr10 | 82369182  | 82369307  |
| CNV | NM_207372    | SH2D4B   | chr10 | 82403748  | 82406316  |
| SMG | NM_001017995 | SH3PXD2B | chr5  | 171760502 | 171766920 |
| SMG | NM_001017995 | SH3PXD2B | chr5  | 171773139 | 171773265 |
| SMG | NM_001017995 | SH3PXD2B | chr5  | 171774286 | 171774336 |
| SMG | NM_001017995 | SH3PXD2B | chr5  | 171777366 | 171777593 |
| SMG | NM_001017995 | SH3PXD2B | chr5  | 171780891 | 171781009 |
| SMG | NM_001017995 | SH3PXD2B | chr5  | 171785776 | 171785881 |
| SMG | NM_001017995 | SH3PXD2B | chr5  | 171789738 | 171789873 |
| SMG | NM_001017995 | SH3PXD2B | chr5  | 171800793 | 171800819 |
| SMG | NM_001017995 | SH3PXD2B | chr5  | 171809039 | 171809131 |
| SMG | NM_001017995 | SH3PXD2B | chr5  | 171821566 | 171821643 |
| SMG | NM_001017995 | SH3PXD2B | chr5  | 171833280 | 171833356 |
| SMG | NM_001017995 | SH3PXD2B | chr5  | 171849419 | 171849500 |
| SMG | NM_001017995 | SH3PXD2B | chr5  | 171881281 | 171881527 |
| LIT | NM_001135053 | SIGIRR   | chr11 | 405715    | 406059    |
| LIT | NM_001135053 | SIGIRR   | chr11 | 406348    | 406538    |
| LIT | NM_001135053 | SIGIRR   | chr11 | 406842    | 406993    |
| LIT | NM_001135053 | SIGIRR   | chr11 | 407061    | 407164    |

|     |              |         |       |           |           |
|-----|--------------|---------|-------|-----------|-----------|
| LIT | NM_001135053 | SIGIRR  | chr11 | 407424    | 407568    |
| LIT | NM_001135053 | SIGIRR  | chr11 | 407816    | 407957    |
| LIT | NM_001135053 | SIGIRR  | chr11 | 408072    | 408206    |
| LIT | NM_001135053 | SIGIRR  | chr11 | 408694    | 408893    |
| LIT | NM_001135053 | SIGIRR  | chr11 | 409867    | 410027    |
| LIT | NM_001135053 | SIGIRR  | chr11 | 417293    | 417397    |
| SMG | NM_001198558 | SIGLEC9 | chr19 | 51628136  | 51628652  |
| SMG | NM_001198558 | SIGLEC9 | chr19 | 51628853  | 51629132  |
| SMG | NM_001198558 | SIGLEC9 | chr19 | 51629337  | 51629385  |
| SMG | NM_001198558 | SIGLEC9 | chr19 | 51630286  | 51630553  |
| SMG | NM_001198558 | SIGLEC9 | chr19 | 51631205  | 51631296  |
| SMG | NM_001198558 | SIGLEC9 | chr19 | 51631670  | 51631767  |
| SMG | NM_001198558 | SIGLEC9 | chr19 | 51639218  | 51639520  |
| SMG | NM_020125    | SLAMF8  | chr1  | 159796478 | 159796728 |
| SMG | NM_020125    | SLAMF8  | chr1  | 159799655 | 159799982 |
| SMG | NM_020125    | SLAMF8  | chr1  | 159802665 | 159802971 |
| SMG | NM_020125    | SLAMF8  | chr1  | 159803051 | 159803159 |
| SMG | NM_020125    | SLAMF8  | chr1  | 159804973 | 159807282 |
| SMG | NM_003051    | SLC16A1 | chr1  | 113454469 | 113456787 |
| SMG | NM_003051    | SLC16A1 | chr1  | 113459799 | 113460666 |
| SMG | NM_003051    | SLC16A1 | chr1  | 113464611 | 113464755 |
| SMG | NM_003051    | SLC16A1 | chr1  | 113471713 | 113471974 |
| SMG | NM_003051    | SLC16A1 | chr1  | 113498656 | 113498975 |
| SMG | NM_001270622 | SLC16A7 | chr12 | 59989820  | 59990017  |
| SMG | NM_001270622 | SLC16A7 | chr12 | 60048932  | 60049031  |
| SMG | NM_001270622 | SLC16A7 | chr12 | 60098572  | 60098799  |
| SMG | NM_001270622 | SLC16A7 | chr12 | 60164999  | 60165143  |
| SMG | NM_001270622 | SLC16A7 | chr12 | 60168437  | 60169256  |
| SMG | NM_001270622 | SLC16A7 | chr12 | 60173203  | 60183635  |
| SMG | NM_005835    | SLC17A2 | chr6  | 25912983  | 25913679  |
| SMG | NM_005835    | SLC17A2 | chr6  | 25914807  | 25914898  |
| SMG | NM_005835    | SLC17A2 | chr6  | 25915963  | 25916096  |
| SMG | NM_005835    | SLC17A2 | chr6  | 25916912  | 25917074  |
| SMG | NM_005835    | SLC17A2 | chr6  | 25917196  | 25917315  |
| SMG | NM_005835    | SLC17A2 | chr6  | 25918714  | 25918801  |
| SMG | NM_005835    | SLC17A2 | chr6  | 25921233  | 25921321  |
| SMG | NM_005835    | SLC17A2 | chr6  | 25921406  | 25921640  |
| SMG | NM_005835    | SLC17A2 | chr6  | 25923922  | 25924134  |
| SMG | NM_005835    | SLC17A2 | chr6  | 25925996  | 25926107  |
| SMG | NM_005835    | SLC17A2 | chr6  | 25930504  | 25930954  |
| SMG | NM_006672    | SLC22A7 | chr6  | 43265997  | 43266489  |
| SMG | NM_006672    | SLC22A7 | chr6  | 43267127  | 43267231  |
| SMG | NM_006672    | SLC22A7 | chr6  | 43267364  | 43267519  |

|     |              |          |       |          |          |
|-----|--------------|----------|-------|----------|----------|
| SMG | NM_006672    | SLC22A7  | chr6  | 43267635 | 43267804 |
| SMG | NM_006672    | SLC22A7  | chr6  | 43268872 | 43268996 |
| SMG | NM_006672    | SLC22A7  | chr6  | 43269320 | 43269430 |
| SMG | NM_006672    | SLC22A7  | chr6  | 43269937 | 43270152 |
| SMG | NM_006672    | SLC22A7  | chr6  | 43270392 | 43270501 |
| SMG | NM_006672    | SLC22A7  | chr6  | 43271775 | 43271982 |
| SMG | NM_006672    | SLC22A7  | chr6  | 43272408 | 43273276 |
| SMG | NM_001184732 | SLC22A8  | chr11 | 62760295 | 62760808 |
| SMG | NM_001184732 | SLC22A8  | chr11 | 62760895 | 62761099 |
| SMG | NM_001184732 | SLC22A8  | chr11 | 62761241 | 62761350 |
| SMG | NM_001184732 | SLC22A8  | chr11 | 62762013 | 62762228 |
| SMG | NM_001184732 | SLC22A8  | chr11 | 62763175 | 62763291 |
| SMG | NM_001184732 | SLC22A8  | chr11 | 62763500 | 62763624 |
| SMG | NM_001184732 | SLC22A8  | chr11 | 62766392 | 62766561 |
| SMG | NM_001184732 | SLC22A8  | chr11 | 62767159 | 62767314 |
| SMG | NM_001184732 | SLC22A8  | chr11 | 62768191 | 62768295 |
| SMG | NM_001184732 | SLC22A8  | chr11 | 62782097 | 62782434 |
| SMG | NM_001184732 | SLC22A8  | chr11 | 62783200 | 62783317 |
| CNV | NM_020689    | SLC24A3  | chr20 | 19193289 | 19193628 |
| CNV | NM_020689    | SLC24A3  | chr20 | 19261602 | 19261731 |
| CNV | NM_020689    | SLC24A3  | chr20 | 19496131 | 19496208 |
| CNV | NM_020689    | SLC24A3  | chr20 | 19560643 | 19560718 |
| CNV | NM_020689    | SLC24A3  | chr20 | 19565614 | 19565699 |
| CNV | NM_020689    | SLC24A3  | chr20 | 19566084 | 19566188 |
| CNV | NM_020689    | SLC24A3  | chr20 | 19634705 | 19634780 |
| CNV | NM_020689    | SLC24A3  | chr20 | 19646507 | 19646533 |
| CNV | NM_020689    | SLC24A3  | chr20 | 19654244 | 19654298 |
| CNV | NM_020689    | SLC24A3  | chr20 | 19662501 | 19662635 |
| CNV | NM_020689    | SLC24A3  | chr20 | 19664819 | 19664980 |
| CNV | NM_020689    | SLC24A3  | chr20 | 19665743 | 19666005 |
| CNV | NM_020689    | SLC24A3  | chr20 | 19673902 | 19674069 |
| CNV | NM_020689    | SLC24A3  | chr20 | 19677440 | 19677555 |
| CNV | NM_020689    | SLC24A3  | chr20 | 19679211 | 19679324 |
| CNV | NM_020689    | SLC24A3  | chr20 | 19698171 | 19698237 |
| CNV | NM_020689    | SLC24A3  | chr20 | 19701634 | 19703541 |
| SMG | NM_001160210 | SLC25A13 | chr7  | 95749531 | 95750689 |
| SMG | NM_001160210 | SLC25A13 | chr7  | 95750966 | 95751057 |
| SMG | NM_001160210 | SLC25A13 | chr7  | 95751150 | 95751309 |
| SMG | NM_001160210 | SLC25A13 | chr7  | 95761054 | 95761193 |
| SMG | NM_001160210 | SLC25A13 | chr7  | 95775867 | 95776008 |
| SMG | NM_001160210 | SLC25A13 | chr7  | 95799356 | 95799437 |
| SMG | NM_001160210 | SLC25A13 | chr7  | 95800783 | 95800836 |
| SMG | NM_001160210 | SLC25A13 | chr7  | 95813588 | 95813747 |

|     |              |          |       |           |           |
|-----|--------------|----------|-------|-----------|-----------|
| SMG | NM_001160210 | SLC25A13 | chr7  | 95814238  | 95814326  |
| SMG | NM_001160210 | SLC25A13 | chr7  | 95818605  | 95818690  |
| SMG | NM_001160210 | SLC25A13 | chr7  | 95818892  | 95818986  |
| SMG | NM_001160210 | SLC25A13 | chr7  | 95820420  | 95820559  |
| SMG | NM_001160210 | SLC25A13 | chr7  | 95822348  | 95822495  |
| SMG | NM_001160210 | SLC25A13 | chr7  | 95838149  | 95838289  |
| SMG | NM_001160210 | SLC25A13 | chr7  | 95864113  | 95864229  |
| SMG | NM_001160210 | SLC25A13 | chr7  | 95906507  | 95906650  |
| SMG | NM_001160210 | SLC25A13 | chr7  | 95926209  | 95926263  |
| SMG | NM_001160210 | SLC25A13 | chr7  | 95951253  | 95951459  |
| SMG | NM_031212    | SLC25A28 | chr10 | 101370274 | 101371123 |
| SMG | NM_031212    | SLC25A28 | chr10 | 101372299 | 101372356 |
| SMG | NM_031212    | SLC25A28 | chr10 | 101373452 | 101373681 |
| SMG | NM_031212    | SLC25A28 | chr10 | 101379801 | 101380221 |
| SMG | NM_001282356 | SLC26A7  | chr8  | 92221721  | 92221770  |
| SMG | NM_001282356 | SLC26A7  | chr8  | 92231117  | 92231233  |
| SMG | NM_001282356 | SLC26A7  | chr8  | 92261766  | 92262072  |
| SMG | NM_001282356 | SLC26A7  | chr8  | 92301363  | 92301474  |
| SMG | NM_001282356 | SLC26A7  | chr8  | 92307758  | 92307931  |
| SMG | NM_001282356 | SLC26A7  | chr8  | 92330443  | 92330608  |
| SMG | NM_001282356 | SLC26A7  | chr8  | 92346522  | 92346675  |
| SMG | NM_001282356 | SLC26A7  | chr8  | 92350377  | 92350460  |
| SMG | NM_001282356 | SLC26A7  | chr8  | 92352631  | 92352779  |
| SMG | NM_001282356 | SLC26A7  | chr8  | 92355580  | 92355694  |
| SMG | NM_001282356 | SLC26A7  | chr8  | 92364037  | 92364115  |
| SMG | NM_001282356 | SLC26A7  | chr8  | 92365128  | 92365224  |
| SMG | NM_001282356 | SLC26A7  | chr8  | 92374580  | 92374687  |
| SMG | NM_001282356 | SLC26A7  | chr8  | 92375699  | 92375766  |
| SMG | NM_001282356 | SLC26A7  | chr8  | 92378807  | 92378945  |
| SMG | NM_001282356 | SLC26A7  | chr8  | 92382012  | 92382061  |
| SMG | NM_001282356 | SLC26A7  | chr8  | 92401565  | 92401666  |
| SMG | NM_001282356 | SLC26A7  | chr8  | 92406024  | 92406079  |
| SMG | NM_001282356 | SLC26A7  | chr8  | 92406163  | 92406267  |
| SMG | NM_001282356 | SLC26A7  | chr8  | 92407289  | 92410382  |
| SMG | NM_052934    | SLC26A9  | chr1  | 205882176 | 205884532 |
| SMG | NM_052934    | SLC26A9  | chr1  | 205886410 | 205886482 |
| SMG | NM_052934    | SLC26A9  | chr1  | 205887967 | 205888113 |
| SMG | NM_052934    | SLC26A9  | chr1  | 205889303 | 205889358 |
| SMG | NM_052934    | SLC26A9  | chr1  | 205890693 | 205890975 |
| SMG | NM_052934    | SLC26A9  | chr1  | 205892209 | 205892323 |
| SMG | NM_052934    | SLC26A9  | chr1  | 205892462 | 205892555 |
| SMG | NM_052934    | SLC26A9  | chr1  | 205892671 | 205892741 |
| SMG | NM_052934    | SLC26A9  | chr1  | 205893510 | 205893617 |

|     |              |         |               |           |           |
|-----|--------------|---------|---------------|-----------|-----------|
| SMG | NM_052934    | SLC26A9 | chr1          | 205895662 | 205895758 |
| SMG | NM_052934    | SLC26A9 | chr1          | 205896338 | 205896416 |
| SMG | NM_052934    | SLC26A9 | chr1          | 205896619 | 205896733 |
| SMG | NM_052934    | SLC26A9 | chr1          | 205897029 | 205897177 |
| SMG | NM_052934    | SLC26A9 | chr1          | 205897954 | 205898037 |
| SMG | NM_052934    | SLC26A9 | chr1          | 205898331 | 205898484 |
| SMG | NM_052934    | SLC26A9 | chr1          | 205899019 | 205899184 |
| SMG | NM_052934    | SLC26A9 | chr1          | 205900987 | 205901163 |
| SMG | NM_052934    | SLC26A9 | chr1          | 205901829 | 205901940 |
| SMG | NM_052934    | SLC26A9 | chr1          | 205902072 | 205902212 |
| SMG | NM_052934    | SLC26A9 | chr1          | 205904823 | 205904966 |
| SMG | NM_052934    | SLC26A9 | chr1          | 205912492 | 205912588 |
| LIT | NM_001078174 | SLC29A1 | chr6          | 44187241  | 44187519  |
| LIT | NM_001078174 | SLC29A1 | chr6          | 44194996  | 44195079  |
| LIT | NM_001078174 | SLC29A1 | chr6          | 44197126  | 44197208  |
| LIT | NM_001078174 | SLC29A1 | chr6          | 44197325  | 44197528  |
| LIT | NM_001078174 | SLC29A1 | chr6          | 44197643  | 44197783  |
| LIT | NM_001078174 | SLC29A1 | chr6          | 44198083  | 44198218  |
| LIT | NM_001078174 | SLC29A1 | chr6          | 44198304  | 44198402  |
| LIT | NM_001078174 | SLC29A1 | chr6          | 44198547  | 44198626  |
| LIT | NM_001078174 | SLC29A1 | chr6          | 44199100  | 44199198  |
| LIT | NM_001078174 | SLC29A1 | chr6          | 44199734  | 44199843  |
| LIT | NM_001078174 | SLC29A1 | chr6          | 44200079  | 44200165  |
| LIT | NM_001078174 | SLC29A1 | chr6          | 44200543  | 44200743  |
| LIT | NM_001078174 | SLC29A1 | chr6          | 44201153  | 44201888  |
| LIT | NM_001178044 | SLC44A4 | chr6_cox_hap2 | 3340716   | 3341272   |
| LIT | NM_001178044 | SLC44A4 | chr6_cox_hap2 | 3342175   | 3342260   |
| LIT | NM_001178044 | SLC44A4 | chr6_cox_hap2 | 3342339   | 3342434   |
| LIT | NM_001178044 | SLC44A4 | chr6_cox_hap2 | 3342533   | 3342604   |
| LIT | NM_001178044 | SLC44A4 | chr6_cox_hap2 | 3342838   | 3342912   |
| LIT | NM_001178044 | SLC44A4 | chr6_cox_hap2 | 3343021   | 3343125   |
| LIT | NM_001178044 | SLC44A4 | chr6_cox_hap2 | 3343213   | 3343308   |
| LIT | NM_001178044 | SLC44A4 | chr6_cox_hap2 | 3343396   | 3343650   |
| LIT | NM_001178044 | SLC44A4 | chr6_cox_hap2 | 3346685   | 3346788   |
| LIT | NM_001178044 | SLC44A4 | chr6_cox_hap2 | 3347075   | 3347168   |
| LIT | NM_001178044 | SLC44A4 | chr6_cox_hap2 | 3348133   | 3348233   |
| LIT | NM_001178044 | SLC44A4 | chr6_cox_hap2 | 3348342   | 3348578   |
| LIT | NM_001178044 | SLC44A4 | chr6_cox_hap2 | 3348844   | 3348928   |
| LIT | NM_001178044 | SLC44A4 | chr6_cox_hap2 | 3349004   | 3349092   |
| LIT | NM_001178044 | SLC44A4 | chr6_cox_hap2 | 3351990   | 3352051   |
| LIT | NM_001178044 | SLC44A4 | chr6_cox_hap2 | 3352459   | 3352559   |
| LIT | NM_001178044 | SLC44A4 | chr6_cox_hap2 | 3353382   | 3353461   |
| LIT | NM_001178044 | SLC44A4 | chr6_cox_hap2 | 3353586   | 3353660   |



|     |              |         |               |           |           |
|-----|--------------|---------|---------------|-----------|-----------|
| LIT | NM_001178044 | SLC44A4 | chr6_cox_hap2 | 3354564   | 3354613   |
| LIT | NM_001178044 | SLC44A4 | chr6_cox_hap2 | 3356471   | 3356577   |
| CNV | NM_001178015 | SLC4A10 | chr2          | 162480844 | 162481076 |
| CNV | NM_001178015 | SLC4A10 | chr2          | 162627482 | 162627564 |
| CNV | NM_001178015 | SLC4A10 | chr2          | 162660958 | 162661105 |
| CNV | NM_001178015 | SLC4A10 | chr2          | 162696298 | 162696437 |
| CNV | NM_001178015 | SLC4A10 | chr2          | 162711479 | 162711640 |
| CNV | NM_001178015 | SLC4A10 | chr2          | 162719383 | 162719572 |
| CNV | NM_001178015 | SLC4A10 | chr2          | 162728802 | 162728894 |
| CNV | NM_001178015 | SLC4A10 | chr2          | 162730425 | 162730515 |
| CNV | NM_001178015 | SLC4A10 | chr2          | 162735640 | 162735798 |
| CNV | NM_001178015 | SLC4A10 | chr2          | 162738866 | 162738954 |
| CNV | NM_001178015 | SLC4A10 | chr2          | 162751188 | 162751335 |
| CNV | NM_001178015 | SLC4A10 | chr2          | 162757420 | 162757521 |
| CNV | NM_001178015 | SLC4A10 | chr2          | 162760513 | 162760688 |
| CNV | NM_001178015 | SLC4A10 | chr2          | 162761285 | 162761419 |
| CNV | NM_001178015 | SLC4A10 | chr2          | 162762151 | 162762397 |
| CNV | NM_001178015 | SLC4A10 | chr2          | 162799301 | 162799407 |
| CNV | NM_001178015 | SLC4A10 | chr2          | 162804075 | 162804237 |
| CNV | NM_001178015 | SLC4A10 | chr2          | 162805657 | 162805771 |
| CNV | NM_001178015 | SLC4A10 | chr2          | 162807196 | 162807358 |
| CNV | NM_001178015 | SLC4A10 | chr2          | 162813498 | 162813750 |
| CNV | NM_001178015 | SLC4A10 | chr2          | 162814996 | 162815065 |
| CNV | NM_001178015 | SLC4A10 | chr2          | 162820644 | 162820818 |
| CNV | NM_001178015 | SLC4A10 | chr2          | 162821560 | 162821683 |
| CNV | NM_001178015 | SLC4A10 | chr2          | 162830758 | 162830826 |
| CNV | NM_001178015 | SLC4A10 | chr2          | 162833269 | 162833386 |
| CNV | NM_001178015 | SLC4A10 | chr2          | 162834231 | 162834270 |
| CNV | NM_001178015 | SLC4A10 | chr2          | 162839688 | 162841786 |
| CNV | NM_001134367 | SLC6A6  | chr3          | 14444075  | 14444355  |
| CNV | NM_001134367 | SLC6A6  | chr3          | 14457919  | 14457961  |
| CNV | NM_001134367 | SLC6A6  | chr3          | 14485135  | 14485371  |
| CNV | NM_001134367 | SLC6A6  | chr3          | 14487224  | 14487359  |
| CNV | NM_001134367 | SLC6A6  | chr3          | 14489089  | 14489324  |
| CNV | NM_001134367 | SLC6A6  | chr3          | 14499457  | 14499590  |
| CNV | NM_001134367 | SLC6A6  | chr3          | 14508023  | 14508158  |
| CNV | NM_001134367 | SLC6A6  | chr3          | 14509360  | 14509464  |
| CNV | NM_001134367 | SLC6A6  | chr3          | 14509595  | 14509720  |
| CNV | NM_001134367 | SLC6A6  | chr3          | 14513712  | 14513825  |
| CNV | NM_001134367 | SLC6A6  | chr3          | 14518712  | 14518850  |
| CNV | NM_001134367 | SLC6A6  | chr3          | 14519973  | 14520076  |
| CNV | NM_001134367 | SLC6A6  | chr3          | 14520592  | 14520693  |
| CNV | NM_001134367 | SLC6A6  | chr3          | 14523178  | 14523349  |

|     |              |         |       |           |           |
|-----|--------------|---------|-------|-----------|-----------|
| CNV | NM_001134367 | SLC6A6  | chr3  | 14526374  | 14530857  |
| CNV | NM_180991    | SLCO4C1 | chr5  | 101569691 | 101572722 |
| CNV | NM_180991    | SLCO4C1 | chr5  | 101574954 | 101575092 |
| CNV | NM_180991    | SLCO4C1 | chr5  | 101576421 | 101576486 |
| CNV | NM_180991    | SLCO4C1 | chr5  | 101582955 | 101583146 |
| CNV | NM_180991    | SLCO4C1 | chr5  | 101585341 | 101585492 |
| CNV | NM_180991    | SLCO4C1 | chr5  | 101592818 | 101593014 |
| CNV | NM_180991    | SLCO4C1 | chr5  | 101593646 | 101593791 |
| CNV | NM_180991    | SLCO4C1 | chr5  | 101595916 | 101596023 |
| CNV | NM_180991    | SLCO4C1 | chr5  | 101597615 | 101597737 |
| CNV | NM_180991    | SLCO4C1 | chr5  | 101599387 | 101599484 |
| CNV | NM_180991    | SLCO4C1 | chr5  | 101606327 | 101606510 |
| CNV | NM_180991    | SLCO4C1 | chr5  | 101627046 | 101627310 |
| CNV | NM_180991    | SLCO4C1 | chr5  | 101631611 | 101632253 |
| SMG | NM_003061    | SLIT1   | chr10 | 98757794  | 98761107  |
| SMG | NM_003061    | SLIT1   | chr10 | 98761914  | 98762126  |
| SMG | NM_003061    | SLIT1   | chr10 | 98762460  | 98762749  |
| SMG | NM_003061    | SLIT1   | chr10 | 98763824  | 98763979  |
| SMG | NM_003061    | SLIT1   | chr10 | 98764449  | 98764580  |
| SMG | NM_003061    | SLIT1   | chr10 | 98766239  | 98766477  |
| SMG | NM_003061    | SLIT1   | chr10 | 98770749  | 98770887  |
| SMG | NM_003061    | SLIT1   | chr10 | 98773497  | 98773591  |
| SMG | NM_003061    | SLIT1   | chr10 | 98773775  | 98773915  |
| SMG | NM_003061    | SLIT1   | chr10 | 98778342  | 98778440  |
| SMG | NM_003061    | SLIT1   | chr10 | 98778739  | 98778864  |
| SMG | NM_003061    | SLIT1   | chr10 | 98781006  | 98781170  |
| SMG | NM_003061    | SLIT1   | chr10 | 98790513  | 98790585  |
| SMG | NM_003061    | SLIT1   | chr10 | 98791362  | 98791434  |
| SMG | NM_003061    | SLIT1   | chr10 | 98794227  | 98794299  |
| SMG | NM_003061    | SLIT1   | chr10 | 98797454  | 98797523  |
| SMG | NM_003061    | SLIT1   | chr10 | 98799744  | 98799877  |
| SMG | NM_003061    | SLIT1   | chr10 | 98802657  | 98802824  |
| SMG | NM_003061    | SLIT1   | chr10 | 98803126  | 98803270  |
| SMG | NM_003061    | SLIT1   | chr10 | 98806410  | 98806554  |
| SMG | NM_003061    | SLIT1   | chr10 | 98806747  | 98806822  |
| SMG | NM_003061    | SLIT1   | chr10 | 98807446  | 98807591  |
| SMG | NM_003061    | SLIT1   | chr10 | 98807729  | 98807753  |
| SMG | NM_003061    | SLIT1   | chr10 | 98808711  | 98808875  |
| SMG | NM_003061    | SLIT1   | chr10 | 98816077  | 98816221  |
| SMG | NM_003061    | SLIT1   | chr10 | 98816966  | 98817038  |
| SMG | NM_003061    | SLIT1   | chr10 | 98819216  | 98819288  |
| SMG | NM_003061    | SLIT1   | chr10 | 98819843  | 98819915  |
| SMG | NM_003061    | SLIT1   | chr10 | 98820396  | 98820544  |

|     |              |       |       |          |          |
|-----|--------------|-------|-------|----------|----------|
| SMG | NM_003061    | SLIT1 | chr10 | 98823211 | 98823375 |
| SMG | NM_003061    | SLIT1 | chr10 | 98823924 | 98823996 |
| SMG | NM_003061    | SLIT1 | chr10 | 98824561 | 98824633 |
| SMG | NM_003061    | SLIT1 | chr10 | 98825771 | 98825843 |
| SMG | NM_003061    | SLIT1 | chr10 | 98917574 | 98917646 |
| SMG | NM_003061    | SLIT1 | chr10 | 98923136 | 98923208 |
| SMG | NM_003061    | SLIT1 | chr10 | 98924575 | 98924647 |
| SMG | NM_003061    | SLIT1 | chr10 | 98945234 | 98945683 |
| DRV | NM_001003652 | SMAD2 | chr18 | 45359465 | 45368321 |
| DRV | NM_001003652 | SMAD2 | chr18 | 45371710 | 45371855 |
| DRV | NM_001003652 | SMAD2 | chr18 | 45372033 | 45372171 |
| DRV | NM_001003652 | SMAD2 | chr18 | 45374845 | 45375058 |
| DRV | NM_001003652 | SMAD2 | chr18 | 45377644 | 45377698 |
| DRV | NM_001003652 | SMAD2 | chr18 | 45391429 | 45391504 |
| DRV | NM_001003652 | SMAD2 | chr18 | 45394693 | 45394828 |
| DRV | NM_001003652 | SMAD2 | chr18 | 45395613 | 45395807 |
| DRV | NM_001003652 | SMAD2 | chr18 | 45396845 | 45396935 |
| DRV | NM_001003652 | SMAD2 | chr18 | 45422891 | 45423180 |
| DRV | NM_001003652 | SMAD2 | chr18 | 45457170 | 45457517 |
| CNV | NM_005902    | SMAD3 | chr15 | 67358194 | 67358698 |
| CNV | NM_005902    | SMAD3 | chr15 | 67457232 | 67457426 |
| CNV | NM_005902    | SMAD3 | chr15 | 67457590 | 67457722 |
| CNV | NM_005902    | SMAD3 | chr15 | 67459116 | 67459191 |
| CNV | NM_005902    | SMAD3 | chr15 | 67462891 | 67462942 |
| CNV | NM_005902    | SMAD3 | chr15 | 67473578 | 67473791 |
| CNV | NM_005902    | SMAD3 | chr15 | 67477064 | 67477202 |
| CNV | NM_005902    | SMAD3 | chr15 | 67479702 | 67479847 |
| CNV | NM_005902    | SMAD3 | chr15 | 67482750 | 67487533 |
| DRV | NM_005359    | SMAD4 | chr18 | 48556582 | 48556993 |
| DRV | NM_005359    | SMAD4 | chr18 | 48573289 | 48573665 |
| DRV | NM_005359    | SMAD4 | chr18 | 48575055 | 48575230 |
| DRV | NM_005359    | SMAD4 | chr18 | 48575664 | 48575694 |
| DRV | NM_005359    | SMAD4 | chr18 | 48581150 | 48581363 |
| DRV | NM_005359    | SMAD4 | chr18 | 48584494 | 48584614 |
| DRV | NM_005359    | SMAD4 | chr18 | 48584709 | 48584826 |
| DRV | NM_005359    | SMAD4 | chr18 | 48586235 | 48586286 |
| DRV | NM_005359    | SMAD4 | chr18 | 48591792 | 48591976 |
| DRV | NM_005359    | SMAD4 | chr18 | 48593388 | 48593557 |
| DRV | NM_005359    | SMAD4 | chr18 | 48603007 | 48603146 |
| DRV | NM_005359    | SMAD4 | chr18 | 48604625 | 48611411 |
| LIT | NM_001190821 | SMAD7 | chr18 | 46446222 | 46448280 |
| LIT | NM_001190821 | SMAD7 | chr18 | 46468850 | 46468922 |
| LIT | NM_001190821 | SMAD7 | chr18 | 46474753 | 46474807 |

|     |              |             |       |           |           |
|-----|--------------|-------------|-------|-----------|-----------|
| LIT | NM_001190821 | SMAD7       | chr18 | 46476181  | 46477081  |
| SMG | NM_022733    | SMAP2       | chr1  | 40839377  | 40839895  |
| SMG | NM_022733    | SMAP2       | chr1  | 40872407  | 40872541  |
| SMG | NM_022733    | SMAP2       | chr1  | 40874324  | 40874410  |
| SMG | NM_022733    | SMAP2       | chr1  | 40875428  | 40875507  |
| SMG | NM_022733    | SMAP2       | chr1  | 40878687  | 40878774  |
| SMG | NM_022733    | SMAP2       | chr1  | 40879830  | 40879912  |
| SMG | NM_022733    | SMAP2       | chr1  | 40880943  | 40881053  |
| SMG | NM_022733    | SMAP2       | chr1  | 40881847  | 40882013  |
| SMG | NM_022733    | SMAP2       | chr1  | 40882451  | 40882768  |
| SMG | NM_022733    | SMAP2       | chr1  | 40887647  | 40888998  |
| DRV | NM_005631    | SMO         | chr7  | 128828712 | 128829323 |
| DRV | NM_005631    | SMO         | chr7  | 128843224 | 128843430 |
| DRV | NM_005631    | SMO         | chr7  | 128845043 | 128845253 |
| DRV | NM_005631    | SMO         | chr7  | 128845450 | 128845623 |
| DRV | NM_005631    | SMO         | chr7  | 128845990 | 128846210 |
| DRV | NM_005631    | SMO         | chr7  | 128846304 | 128846428 |
| DRV | NM_005631    | SMO         | chr7  | 128848599 | 128848692 |
| DRV | NM_005631    | SMO         | chr7  | 128849129 | 128849238 |
| DRV | NM_005631    | SMO         | chr7  | 128850203 | 128850389 |
| DRV | NM_005631    | SMO         | chr7  | 128850805 | 128850954 |
| DRV | NM_005631    | SMO         | chr7  | 128851476 | 128851611 |
| DRV | NM_005631    | SMO         | chr7  | 128851864 | 128853385 |
| CNV | NR_001290    | SNORD116-19 | chr15 | 25328733  | 25328827  |
| CNV | NM_022806    | SNRPN       | chr15 | 25068793  | 25068970  |
| CNV | NM_022806    | SNRPN       | chr15 | 25131662  | 25131736  |
| CNV | NM_022806    | SNRPN       | chr15 | 25165157  | 25165271  |
| CNV | NM_022806    | SNRPN       | chr15 | 25207260  | 25207356  |
| CNV | NM_022806    | SNRPN       | chr15 | 25213078  | 25213229  |
| CNV | NM_022806    | SNRPN       | chr15 | 25219457  | 25219603  |
| CNV | NM_022806    | SNRPN       | chr15 | 25220504  | 25220656  |
| CNV | NM_022806    | SNRPN       | chr15 | 25221451  | 25221563  |
| CNV | NM_022806    | SNRPN       | chr15 | 25222023  | 25222176  |
| CNV | NM_022806    | SNRPN       | chr15 | 25222924  | 25223063  |
| CNV | NM_022806    | SNRPN       | chr15 | 25223339  | 25223465  |
| CNV | NM_022806    | SNRPN       | chr15 | 25223553  | 25223729  |
| CNV | NM_018967    | SNTG1       | chr8  | 50824596  | 50824791  |
| CNV | NM_018967    | SNTG1       | chr8  | 51085120  | 51085195  |
| CNV | NM_018967    | SNTG1       | chr8  | 51306771  | 51306825  |
| CNV | NM_018967    | SNTG1       | chr8  | 51314769  | 51314904  |
| CNV | NM_018967    | SNTG1       | chr8  | 51351102  | 51351159  |
| CNV | NM_018967    | SNTG1       | chr8  | 51362227  | 51362285  |
| CNV | NM_018967    | SNTG1       | chr8  | 51363115  | 51363159  |

|     |           |        |       |           |           |
|-----|-----------|--------|-------|-----------|-----------|
| CNV | NM_018967 | SNTG1  | chr8  | 51363247  | 51363289  |
| CNV | NM_018967 | SNTG1  | chr8  | 51415337  | 51415440  |
| CNV | NM_018967 | SNTG1  | chr8  | 51442736  | 51442819  |
| CNV | NM_018967 | SNTG1  | chr8  | 51449237  | 51449368  |
| CNV | NM_018967 | SNTG1  | chr8  | 51465609  | 51465739  |
| CNV | NM_018967 | SNTG1  | chr8  | 51503438  | 51503477  |
| CNV | NM_018967 | SNTG1  | chr8  | 51569468  | 51569585  |
| CNV | NM_018967 | SNTG1  | chr8  | 51571151  | 51571223  |
| CNV | NM_018967 | SNTG1  | chr8  | 51617159  | 51617312  |
| CNV | NM_018967 | SNTG1  | chr8  | 51621445  | 51621538  |
| CNV | NM_018967 | SNTG1  | chr8  | 51664560  | 51664671  |
| CNV | NM_018967 | SNTG1  | chr8  | 51705230  | 51705427  |
| DRV | NM_000346 | SOX9   | chr17 | 70117160  | 70117963  |
| DRV | NM_000346 | SOX9   | chr17 | 70118859  | 70119113  |
| DRV | NM_000346 | SOX9   | chr17 | 70119683  | 70122560  |
| SMG | NM_014946 | SPAST  | chr2  | 32288679  | 32289315  |
| SMG | NM_014946 | SPAST  | chr2  | 32312560  | 32312647  |
| SMG | NM_014946 | SPAST  | chr2  | 32314590  | 32314674  |
| SMG | NM_014946 | SPAST  | chr2  | 32323864  | 32323960  |
| SMG | NM_014946 | SPAST  | chr2  | 32339706  | 32339894  |
| SMG | NM_014946 | SPAST  | chr2  | 32340770  | 32340904  |
| SMG | NM_014946 | SPAST  | chr2  | 32341187  | 32341281  |
| SMG | NM_014946 | SPAST  | chr2  | 32352016  | 32352091  |
| SMG | NM_014946 | SPAST  | chr2  | 32353476  | 32353548  |
| SMG | NM_014946 | SPAST  | chr2  | 32361631  | 32361707  |
| SMG | NM_014946 | SPAST  | chr2  | 32361945  | 32362037  |
| SMG | NM_014946 | SPAST  | chr2  | 32362177  | 32362257  |
| SMG | NM_014946 | SPAST  | chr2  | 32366972  | 32367015  |
| SMG | NM_014946 | SPAST  | chr2  | 32368404  | 32368484  |
| SMG | NM_014946 | SPAST  | chr2  | 32370005  | 32370076  |
| SMG | NM_014946 | SPAST  | chr2  | 32372286  | 32372327  |
| SMG | NM_014946 | SPAST  | chr2  | 32379442  | 32382706  |
| SMG | NM_175064 | SPDYE1 | chr7  | 44040488  | 44040883  |
| SMG | NM_175064 | SPDYE1 | chr7  | 44042188  | 44042416  |
| SMG | NM_175064 | SPDYE1 | chr7  | 44043451  | 44043510  |
| SMG | NM_175064 | SPDYE1 | chr7  | 44044740  | 44044826  |
| SMG | NM_175064 | SPDYE1 | chr7  | 44046866  | 44047185  |
| SMG | NM_175064 | SPDYE1 | chr7  | 44047307  | 44047412  |
| SMG | NM_175064 | SPDYE1 | chr7  | 44048265  | 44049723  |
| SMG | NM_005876 | SPEG   | chr2  | 220299699 | 220300087 |
| SMG | NM_005876 | SPEG   | chr2  | 220309374 | 220309464 |
| SMG | NM_005876 | SPEG   | chr2  | 220309546 | 220309883 |
| SMG | NM_005876 | SPEG   | chr2  | 220312695 | 220313993 |

|     |              |       |      |           |           |
|-----|--------------|-------|------|-----------|-----------|
| SMG | NM_005876    | SPEG  | chr2 | 220315857 | 220316001 |
| SMG | NM_005876    | SPEG  | chr2 | 220316346 | 220316529 |
| SMG | NM_005876    | SPEG  | chr2 | 220326603 | 220326779 |
| SMG | NM_005876    | SPEG  | chr2 | 220327019 | 220327108 |
| SMG | NM_005876    | SPEG  | chr2 | 220329154 | 220329330 |
| SMG | NM_005876    | SPEG  | chr2 | 220331895 | 220332156 |
| SMG | NM_005876    | SPEG  | chr2 | 220333299 | 220333458 |
| SMG | NM_005876    | SPEG  | chr2 | 220333580 | 220333770 |
| SMG | NM_005876    | SPEG  | chr2 | 220333877 | 220334101 |
| SMG | NM_005876    | SPEG  | chr2 | 220336589 | 220336709 |
| SMG | NM_005876    | SPEG  | chr2 | 220336948 | 220337053 |
| SMG | NM_005876    | SPEG  | chr2 | 220337611 | 220337818 |
| SMG | NM_005876    | SPEG  | chr2 | 220338225 | 220338349 |
| SMG | NM_005876    | SPEG  | chr2 | 220338449 | 220338625 |
| SMG | NM_005876    | SPEG  | chr2 | 220341591 | 220341704 |
| SMG | NM_005876    | SPEG  | chr2 | 220341998 | 220342167 |
| SMG | NM_005876    | SPEG  | chr2 | 220342410 | 220342507 |
| SMG | NM_005876    | SPEG  | chr2 | 220342626 | 220342827 |
| SMG | NM_005876    | SPEG  | chr2 | 220343865 | 220343923 |
| SMG | NM_005876    | SPEG  | chr2 | 220344504 | 220344582 |
| SMG | NM_005876    | SPEG  | chr2 | 220344683 | 220344862 |
| SMG | NM_005876    | SPEG  | chr2 | 220345392 | 220345419 |
| SMG | NM_005876    | SPEG  | chr2 | 220346025 | 220346178 |
| SMG | NM_005876    | SPEG  | chr2 | 220346359 | 220346402 |
| SMG | NM_005876    | SPEG  | chr2 | 220347505 | 220347574 |
| SMG | NM_005876    | SPEG  | chr2 | 220347819 | 220349794 |
| SMG | NM_005876    | SPEG  | chr2 | 220350067 | 220350199 |
| SMG | NM_005876    | SPEG  | chr2 | 220352915 | 220353032 |
| SMG | NM_005876    | SPEG  | chr2 | 220353219 | 220353387 |
| SMG | NM_005876    | SPEG  | chr2 | 220353499 | 220353622 |
| SMG | NM_005876    | SPEG  | chr2 | 220353775 | 220353943 |
| SMG | NM_005876    | SPEG  | chr2 | 220354057 | 220354661 |
| SMG | NM_005876    | SPEG  | chr2 | 220355130 | 220355370 |
| SMG | NM_005876    | SPEG  | chr2 | 220355454 | 220355678 |
| SMG | NM_005876    | SPEG  | chr2 | 220356515 | 220356591 |
| SMG | NM_005876    | SPEG  | chr2 | 220356832 | 220356982 |
| SMG | NM_005876    | SPEG  | chr2 | 220357315 | 220358354 |
| CNV | NM_001080394 | SPIDR | chr8 | 48173469  | 48173583  |
| CNV | NM_001080394 | SPIDR | chr8 | 48192449  | 48192605  |
| CNV | NM_001080394 | SPIDR | chr8 | 48196616  | 48196683  |
| CNV | NM_001080394 | SPIDR | chr8 | 48203621  | 48203726  |
| CNV | NM_001080394 | SPIDR | chr8 | 48206455  | 48206619  |
| CNV | NM_001080394 | SPIDR | chr8 | 48308935  | 48309186  |

|     |              |        |       |          |          |
|-----|--------------|--------|-------|----------|----------|
| CNV | NM_001080394 | SPIDR  | chr8  | 48320422 | 48320523 |
| CNV | NM_001080394 | SPIDR  | chr8  | 48352884 | 48353104 |
| CNV | NM_001080394 | SPIDR  | chr8  | 48508372 | 48508568 |
| CNV | NM_001080394 | SPIDR  | chr8  | 48511507 | 48511758 |
| CNV | NM_001080394 | SPIDR  | chr8  | 48586362 | 48586503 |
| CNV | NM_001080394 | SPIDR  | chr8  | 48612964 | 48613052 |
| CNV | NM_001080394 | SPIDR  | chr8  | 48614282 | 48614426 |
| CNV | NM_001080394 | SPIDR  | chr8  | 48614517 | 48614577 |
| CNV | NM_001080394 | SPIDR  | chr8  | 48625223 | 48625434 |
| CNV | NM_001080394 | SPIDR  | chr8  | 48626050 | 48626203 |
| CNV | NM_001080394 | SPIDR  | chr8  | 48639761 | 48639855 |
| CNV | NM_001080394 | SPIDR  | chr8  | 48641494 | 48641609 |
| CNV | NM_001080394 | SPIDR  | chr8  | 48641973 | 48642027 |
| CNV | NM_001080394 | SPIDR  | chr8  | 48647868 | 48648563 |
| LIT | NM_006946    | SPTBN2 | chr11 | 66452719 | 66453575 |
| LIT | NM_006946    | SPTBN2 | chr11 | 66453868 | 66453911 |
| LIT | NM_006946    | SPTBN2 | chr11 | 66454464 | 66454638 |
| LIT | NM_006946    | SPTBN2 | chr11 | 66454897 | 66455118 |
| LIT | NM_006946    | SPTBN2 | chr11 | 66455338 | 66455389 |
| LIT | NM_006946    | SPTBN2 | chr11 | 66455474 | 66455550 |
| LIT | NM_006946    | SPTBN2 | chr11 | 66455639 | 66455782 |
| LIT | NM_006946    | SPTBN2 | chr11 | 66456123 | 66456320 |
| LIT | NM_006946    | SPTBN2 | chr11 | 66456566 | 66456651 |
| LIT | NM_006946    | SPTBN2 | chr11 | 66457275 | 66457414 |
| LIT | NM_006946    | SPTBN2 | chr11 | 66457509 | 66457754 |
| LIT | NM_006946    | SPTBN2 | chr11 | 66458754 | 66459129 |
| LIT | NM_006946    | SPTBN2 | chr11 | 66460006 | 66460211 |
| LIT | NM_006946    | SPTBN2 | chr11 | 66460440 | 66460571 |
| LIT | NM_006946    | SPTBN2 | chr11 | 66460656 | 66460917 |
| LIT | NM_006946    | SPTBN2 | chr11 | 66461242 | 66461332 |
| LIT | NM_006946    | SPTBN2 | chr11 | 66461609 | 66461834 |
| LIT | NM_006946    | SPTBN2 | chr11 | 66463747 | 66464011 |
| LIT | NM_006946    | SPTBN2 | chr11 | 66466109 | 66466256 |
| LIT | NM_006946    | SPTBN2 | chr11 | 66466462 | 66466553 |
| LIT | NM_006946    | SPTBN2 | chr11 | 66466876 | 66467079 |
| LIT | NM_006946    | SPTBN2 | chr11 | 66467996 | 66468753 |
| LIT | NM_006946    | SPTBN2 | chr11 | 66469054 | 66469192 |
| LIT | NM_006946    | SPTBN2 | chr11 | 66472068 | 66472939 |
| LIT | NM_006946    | SPTBN2 | chr11 | 66473154 | 66473308 |
| LIT | NM_006946    | SPTBN2 | chr11 | 66474986 | 66475289 |
| LIT | NM_006946    | SPTBN2 | chr11 | 66475611 | 66475770 |
| LIT | NM_006946    | SPTBN2 | chr11 | 66476372 | 66476490 |
| LIT | NM_006946    | SPTBN2 | chr11 | 66478052 | 66478240 |

|     |              |        |       |           |           |
|-----|--------------|--------|-------|-----------|-----------|
| LIT | NM_006946    | SPTBN2 | chr11 | 66478387  | 66478500  |
| LIT | NM_006946    | SPTBN2 | chr11 | 66481101  | 66481217  |
| LIT | NM_006946    | SPTBN2 | chr11 | 66481561  | 66481642  |
| LIT | NM_006946    | SPTBN2 | chr11 | 66481786  | 66481878  |
| LIT | NM_006946    | SPTBN2 | chr11 | 66482692  | 66482866  |
| LIT | NM_006946    | SPTBN2 | chr11 | 66483300  | 66483452  |
| LIT | NM_006946    | SPTBN2 | chr11 | 66488554  | 66488733  |
| LIT | NM_006946    | SPTBN2 | chr11 | 66488820  | 66488870  |
| CNV | NM_001033117 | SRGAP3 | chr3  | 9022275   | 9027616   |
| CNV | NM_001033117 | SRGAP3 | chr3  | 9032195   | 9032523   |
| CNV | NM_001033117 | SRGAP3 | chr3  | 9034589   | 9034739   |
| CNV | NM_001033117 | SRGAP3 | chr3  | 9036026   | 9036207   |
| CNV | NM_001033117 | SRGAP3 | chr3  | 9051991   | 9052071   |
| CNV | NM_001033117 | SRGAP3 | chr3  | 9054991   | 9055219   |
| CNV | NM_001033117 | SRGAP3 | chr3  | 9055420   | 9055526   |
| CNV | NM_001033117 | SRGAP3 | chr3  | 9057280   | 9057415   |
| CNV | NM_001033117 | SRGAP3 | chr3  | 9066944   | 9067022   |
| CNV | NM_001033117 | SRGAP3 | chr3  | 9068618   | 9068679   |
| CNV | NM_001033117 | SRGAP3 | chr3  | 9069783   | 9069814   |
| CNV | NM_001033117 | SRGAP3 | chr3  | 9079746   | 9079774   |
| CNV | NM_001033117 | SRGAP3 | chr3  | 9089074   | 9089159   |
| CNV | NM_001033117 | SRGAP3 | chr3  | 9094710   | 9094908   |
| CNV | NM_001033117 | SRGAP3 | chr3  | 9097916   | 9098018   |
| CNV | NM_001033117 | SRGAP3 | chr3  | 9099934   | 9100156   |
| CNV | NM_001033117 | SRGAP3 | chr3  | 9101914   | 9102043   |
| CNV | NM_001033117 | SRGAP3 | chr3  | 9106079   | 9106265   |
| CNV | NM_001033117 | SRGAP3 | chr3  | 9121708   | 9121771   |
| CNV | NM_001033117 | SRGAP3 | chr3  | 9146363   | 9146526   |
| CNV | NM_001033117 | SRGAP3 | chr3  | 9166408   | 9166601   |
| CNV | NM_001033117 | SRGAP3 | chr3  | 9290568   | 9291369   |
| LIT | NM_006275    | SRSF6  | chr20 | 42086503  | 42086780  |
| LIT | NM_006275    | SRSF6  | chr20 | 42087000  | 42087149  |
| LIT | NM_006275    | SRSF6  | chr20 | 42088410  | 42088535  |
| LIT | NM_006275    | SRSF6  | chr20 | 42088672  | 42088881  |
| LIT | NM_006275    | SRSF6  | chr20 | 42089154  | 42089238  |
| LIT | NM_006275    | SRSF6  | chr20 | 42089342  | 42092244  |
| SMG | NM_001256511 | SSBP1  | chr7  | 141438120 | 141438393 |
| SMG | NM_001256511 | SSBP1  | chr7  | 141438923 | 141438990 |
| SMG | NM_001256511 | SSBP1  | chr7  | 141441968 | 141442029 |
| SMG | NM_001256511 | SSBP1  | chr7  | 141443360 | 141443501 |
| SMG | NM_001256511 | SSBP1  | chr7  | 141443701 | 141443789 |
| SMG | NM_001256511 | SSBP1  | chr7  | 141445295 | 141445384 |
| SMG | NM_001256511 | SSBP1  | chr7  | 141450110 | 141450288 |



|     |              |         |       |           |           |
|-----|--------------|---------|-------|-----------|-----------|
| SMG | NM_006011    | ST8SIA2 | chr15 | 92937139  | 92937392  |
| SMG | NM_006011    | ST8SIA2 | chr15 | 92973278  | 92973341  |
| SMG | NM_006011    | ST8SIA2 | chr15 | 92977476  | 92977605  |
| SMG | NM_006011    | ST8SIA2 | chr15 | 92981582  | 92981840  |
| SMG | NM_006011    | ST8SIA2 | chr15 | 92987865  | 92988159  |
| SMG | NM_006011    | ST8SIA2 | chr15 | 93007329  | 93011958  |
| CNV | NM_005668    | ST8SIA4 | chr5  | 100142638 | 100147833 |
| CNV | NM_005668    | ST8SIA4 | chr5  | 100191806 | 100192100 |
| CNV | NM_005668    | ST8SIA4 | chr5  | 100222046 | 100222304 |
| CNV | NM_005668    | ST8SIA4 | chr5  | 100231357 | 100231489 |
| CNV | NM_005668    | ST8SIA4 | chr5  | 100238546 | 100238989 |
| LIT | NM_000455    | STK11   | chr19 | 1205797   | 1207202   |
| LIT | NM_000455    | STK11   | chr19 | 1218415   | 1218499   |
| LIT | NM_000455    | STK11   | chr19 | 1219322   | 1219412   |
| LIT | NM_000455    | STK11   | chr19 | 1220371   | 1220504   |
| LIT | NM_000455    | STK11   | chr19 | 1220579   | 1220716   |
| LIT | NM_000455    | STK11   | chr19 | 1221211   | 1221339   |
| LIT | NM_000455    | STK11   | chr19 | 1221947   | 1222005   |
| LIT | NM_000455    | STK11   | chr19 | 1222983   | 1223171   |
| LIT | NM_000455    | STK11   | chr19 | 1226452   | 1226662   |
| LIT | NM_000455    | STK11   | chr19 | 1227591   | 1228434   |
| SMG | NM_001134336 | STRIP2  | chr7  | 129074273 | 129074442 |
| SMG | NM_001134336 | STRIP2  | chr7  | 129079862 | 129079932 |
| SMG | NM_001134336 | STRIP2  | chr7  | 129083864 | 129083939 |
| SMG | NM_001134336 | STRIP2  | chr7  | 129091453 | 129091588 |
| SMG | NM_001134336 | STRIP2  | chr7  | 129093067 | 129093188 |
| SMG | NM_001134336 | STRIP2  | chr7  | 129093982 | 129094051 |
| SMG | NM_001134336 | STRIP2  | chr7  | 129094261 | 129094368 |
| SMG | NM_001134336 | STRIP2  | chr7  | 129095084 | 129095212 |
| SMG | NM_001134336 | STRIP2  | chr7  | 129096279 | 129096483 |
| SMG | NM_001134336 | STRIP2  | chr7  | 129098055 | 129098291 |
| SMG | NM_001134336 | STRIP2  | chr7  | 129098552 | 129098618 |
| SMG | NM_001134336 | STRIP2  | chr7  | 129099357 | 129099421 |
| SMG | NM_001134336 | STRIP2  | chr7  | 129100141 | 129100213 |
| SMG | NM_001134336 | STRIP2  | chr7  | 129102806 | 129102881 |
| SMG | NM_001134336 | STRIP2  | chr7  | 129103884 | 129103982 |
| SMG | NM_001134336 | STRIP2  | chr7  | 129104452 | 129104579 |
| SMG | NM_001134336 | STRIP2  | chr7  | 129107190 | 129107291 |
| SMG | NM_001134336 | STRIP2  | chr7  | 129110489 | 129110556 |
| SMG | NM_001134336 | STRIP2  | chr7  | 129120625 | 129120730 |
| SMG | NM_001134336 | STRIP2  | chr7  | 129122682 | 129123475 |
| SMG | NM_000351    | STS     | chrX  | 7137471   | 7137727   |
| SMG | NM_000351    | STS     | chrX  | 7171236   | 7171377   |

|     |           |         |       |           |           |
|-----|-----------|---------|-------|-----------|-----------|
| SMG | NM_000351 | STS     | chrX  | 7175282   | 7175404   |
| SMG | NM_000351 | STS     | chrX  | 7175506   | 7175629   |
| SMG | NM_000351 | STS     | chrX  | 7177389   | 7177813   |
| SMG | NM_000351 | STS     | chrX  | 7193991   | 7194128   |
| SMG | NM_000351 | STS     | chrX  | 7223086   | 7223224   |
| SMG | NM_000351 | STS     | chrX  | 7243379   | 7243539   |
| SMG | NM_000351 | STS     | chrX  | 7252026   | 7252148   |
| SMG | NM_000351 | STS     | chrX  | 7267928   | 7272682   |
| CNV | NM_003850 | SUCLA2  | chr13 | 48516790  | 48517580  |
| CNV | NM_003850 | SUCLA2  | chr13 | 48523074  | 48523163  |
| CNV | NM_003850 | SUCLA2  | chr13 | 48523617  | 48523738  |
| CNV | NM_003850 | SUCLA2  | chr13 | 48528274  | 48528417  |
| CNV | NM_003850 | SUCLA2  | chr13 | 48528530  | 48528692  |
| CNV | NM_003850 | SUCLA2  | chr13 | 48542729  | 48542868  |
| CNV | NM_003850 | SUCLA2  | chr13 | 48547398  | 48547527  |
| CNV | NM_003850 | SUCLA2  | chr13 | 48562675  | 48562838  |
| CNV | NM_003850 | SUCLA2  | chr13 | 48563016  | 48563116  |
| CNV | NM_003850 | SUCLA2  | chr13 | 48570977  | 48571158  |
| CNV | NM_003850 | SUCLA2  | chr13 | 48575315  | 48575462  |
| SMG | NM_006588 | SULT1C4 | chr2  | 108994420 | 108994962 |
| SMG | NM_006588 | SULT1C4 | chr2  | 108998217 | 108998343 |
| SMG | NM_006588 | SULT1C4 | chr2  | 108998840 | 108998938 |
| SMG | NM_006588 | SULT1C4 | chr2  | 108999548 | 108999675 |
| SMG | NM_006588 | SULT1C4 | chr2  | 108999871 | 108999966 |
| SMG | NM_006588 | SULT1C4 | chr2  | 109002647 | 109002828 |
| SMG | NM_006588 | SULT1C4 | chr2  | 109003775 | 109004270 |
| SMG | NM_003168 | SUPT4H1 | chr17 | 56422535  | 56423674  |
| SMG | NM_003168 | SUPT4H1 | chr17 | 56424548  | 56424602  |
| SMG | NM_003168 | SUPT4H1 | chr17 | 56424889  | 56424945  |
| SMG | NM_003168 | SUPT4H1 | chr17 | 56428762  | 56428869  |
| SMG | NM_003168 | SUPT4H1 | chr17 | 56429427  | 56429599  |
| SMG | NM_006950 | SYN1    | chrX  | 47431299  | 47432398  |
| SMG | NM_006950 | SYN1    | chrX  | 47433400  | 47433989  |
| SMG | NM_006950 | SYN1    | chrX  | 47434086  | 47434174  |
| SMG | NM_006950 | SYN1    | chrX  | 47434526  | 47434673  |
| SMG | NM_006950 | SYN1    | chrX  | 47435529  | 47435632  |
| SMG | NM_006950 | SYN1    | chrX  | 47435730  | 47435805  |
| SMG | NM_006950 | SYN1    | chrX  | 47435896  | 47436039  |
| SMG | NM_006950 | SYN1    | chrX  | 47436837  | 47436900  |
| SMG | NM_006950 | SYN1    | chrX  | 47464376  | 47464466  |
| SMG | NM_006950 | SYN1    | chrX  | 47464621  | 47464778  |
| SMG | NM_006950 | SYN1    | chrX  | 47466343  | 47466435  |
| SMG | NM_006950 | SYN1    | chrX  | 47466539  | 47466597  |

|     |              |       |      |           |           |
|-----|--------------|-------|------|-----------|-----------|
| SMG | NM_006950    | SYN1  | chrX | 47478750  | 47479256  |
| SMG | NM_001161708 | SYNC  | chr1 | 33145506  | 33147461  |
| SMG | NM_001161708 | SYNC  | chr1 | 33149858  | 33149983  |
| SMG | NM_001161708 | SYNC  | chr1 | 33160465  | 33161645  |
| SMG | NM_001161708 | SYNC  | chr1 | 33168208  | 33168361  |
| LIT | NM_033071    | SYNE1 | chr6 | 152442818 | 152443811 |
| LIT | NM_033071    | SYNE1 | chr6 | 152451854 | 152451913 |
| LIT | NM_033071    | SYNE1 | chr6 | 152453256 | 152453349 |
| LIT | NM_033071    | SYNE1 | chr6 | 152454410 | 152454623 |
| LIT | NM_033071    | SYNE1 | chr6 | 152456238 | 152456367 |
| LIT | NM_033071    | SYNE1 | chr6 | 152457752 | 152457953 |
| LIT | NM_033071    | SYNE1 | chr6 | 152461084 | 152461296 |
| LIT | NM_033071    | SYNE1 | chr6 | 152462337 | 152462464 |
| LIT | NM_033071    | SYNE1 | chr6 | 152464757 | 152464900 |
| LIT | NM_033071    | SYNE1 | chr6 | 152466621 | 152466690 |
| LIT | NM_033071    | SYNE1 | chr6 | 152469179 | 152469513 |
| LIT | NM_033071    | SYNE1 | chr6 | 152470611 | 152470803 |
| LIT | NM_033071    | SYNE1 | chr6 | 152472687 | 152472825 |
| LIT | NM_033071    | SYNE1 | chr6 | 152473093 | 152473276 |
| LIT | NM_033071    | SYNE1 | chr6 | 152476026 | 152476177 |
| LIT | NM_033071    | SYNE1 | chr6 | 152477044 | 152477232 |
| LIT | NM_033071    | SYNE1 | chr6 | 152485297 | 152485460 |
| LIT | NM_033071    | SYNE1 | chr6 | 152497528 | 152497695 |
| LIT | NM_033071    | SYNE1 | chr6 | 152501270 | 152501429 |
| LIT | NM_033071    | SYNE1 | chr6 | 152510386 | 152510542 |
| LIT | NM_033071    | SYNE1 | chr6 | 152522958 | 152523084 |
| LIT | NM_033071    | SYNE1 | chr6 | 152527302 | 152527497 |
| LIT | NM_033071    | SYNE1 | chr6 | 152529106 | 152529341 |
| LIT | NM_033071    | SYNE1 | chr6 | 152532628 | 152532723 |
| LIT | NM_033071    | SYNE1 | chr6 | 152534746 | 152534894 |
| LIT | NM_033071    | SYNE1 | chr6 | 152536040 | 152536195 |
| LIT | NM_033071    | SYNE1 | chr6 | 152539391 | 152539538 |
| LIT | NM_033071    | SYNE1 | chr6 | 152540137 | 152540320 |
| LIT | NM_033071    | SYNE1 | chr6 | 152541976 | 152542181 |
| LIT | NM_033071    | SYNE1 | chr6 | 152542560 | 152542694 |
| LIT | NM_033071    | SYNE1 | chr6 | 152545628 | 152545799 |
| LIT | NM_033071    | SYNE1 | chr6 | 152546855 | 152547011 |
| LIT | NM_033071    | SYNE1 | chr6 | 152551681 | 152551837 |
| LIT | NM_033071    | SYNE1 | chr6 | 152552525 | 152552702 |
| LIT | NM_033071    | SYNE1 | chr6 | 152553250 | 152553400 |
| LIT | NM_033071    | SYNE1 | chr6 | 152554915 | 152555098 |
| LIT | NM_033071    | SYNE1 | chr6 | 152555802 | 152555935 |
| LIT | NM_033071    | SYNE1 | chr6 | 152557241 | 152557438 |

|     |           |       |      |           |           |
|-----|-----------|-------|------|-----------|-----------|
| LIT | NM_033071 | SYNE1 | chr6 | 152557951 | 152558083 |
| LIT | NM_033071 | SYNE1 | chr6 | 152560667 | 152560841 |
| LIT | NM_033071 | SYNE1 | chr6 | 152563374 | 152563575 |
| LIT | NM_033071 | SYNE1 | chr6 | 152565671 | 152565791 |
| LIT | NM_033071 | SYNE1 | chr6 | 152570295 | 152570397 |
| LIT | NM_033071 | SYNE1 | chr6 | 152576014 | 152576224 |
| LIT | NM_033071 | SYNE1 | chr6 | 152576725 | 152576881 |
| LIT | NM_033071 | SYNE1 | chr6 | 152577768 | 152577900 |
| LIT | NM_033071 | SYNE1 | chr6 | 152583166 | 152583323 |
| LIT | NM_033071 | SYNE1 | chr6 | 152589190 | 152589300 |
| LIT | NM_033071 | SYNE1 | chr6 | 152590289 | 152590421 |
| LIT | NM_033071 | SYNE1 | chr6 | 152599223 | 152599415 |
| LIT | NM_033071 | SYNE1 | chr6 | 152602941 | 152603115 |
| LIT | NM_033071 | SYNE1 | chr6 | 152605112 | 152605307 |
| LIT | NM_033071 | SYNE1 | chr6 | 152614722 | 152614884 |
| LIT | NM_033071 | SYNE1 | chr6 | 152615094 | 152615262 |
| LIT | NM_033071 | SYNE1 | chr6 | 152621775 | 152621916 |
| LIT | NM_033071 | SYNE1 | chr6 | 152623003 | 152623198 |
| LIT | NM_033071 | SYNE1 | chr6 | 152629623 | 152629763 |
| LIT | NM_033071 | SYNE1 | chr6 | 152630965 | 152631152 |
| LIT | NM_033071 | SYNE1 | chr6 | 152631530 | 152631653 |
| LIT | NM_033071 | SYNE1 | chr6 | 152631822 | 152632008 |
| LIT | NM_033071 | SYNE1 | chr6 | 152637983 | 152638121 |
| LIT | NM_033071 | SYNE1 | chr6 | 152639215 | 152639398 |
| LIT | NM_033071 | SYNE1 | chr6 | 152639997 | 152640150 |
| LIT | NM_033071 | SYNE1 | chr6 | 152642372 | 152642525 |
| LIT | NM_033071 | SYNE1 | chr6 | 152642855 | 152643021 |
| LIT | NM_033071 | SYNE1 | chr6 | 152644612 | 152644872 |
| LIT | NM_033071 | SYNE1 | chr6 | 152646218 | 152646437 |
| LIT | NM_033071 | SYNE1 | chr6 | 152647092 | 152647237 |
| LIT | NM_033071 | SYNE1 | chr6 | 152647430 | 152647768 |
| LIT | NM_033071 | SYNE1 | chr6 | 152650864 | 152653025 |
| LIT | NM_033071 | SYNE1 | chr6 | 152655142 | 152655408 |
| LIT | NM_033071 | SYNE1 | chr6 | 152657975 | 152658152 |
| LIT | NM_033071 | SYNE1 | chr6 | 152660375 | 152660501 |
| LIT | NM_033071 | SYNE1 | chr6 | 152665215 | 152665362 |
| LIT | NM_033071 | SYNE1 | chr6 | 152668193 | 152668370 |
| LIT | NM_033071 | SYNE1 | chr6 | 152671752 | 152671905 |
| LIT | NM_033071 | SYNE1 | chr6 | 152673161 | 152673488 |
| LIT | NM_033071 | SYNE1 | chr6 | 152674397 | 152674568 |
| LIT | NM_033071 | SYNE1 | chr6 | 152674723 | 152674879 |
| LIT | NM_033071 | SYNE1 | chr6 | 152675859 | 152676111 |
| LIT | NM_033071 | SYNE1 | chr6 | 152679507 | 152679672 |

|     |           |       |      |           |           |
|-----|-----------|-------|------|-----------|-----------|
| LIT | NM_033071 | SYNE1 | chr6 | 152680449 | 152680593 |
| LIT | NM_033071 | SYNE1 | chr6 | 152683304 | 152683458 |
| LIT | NM_033071 | SYNE1 | chr6 | 152685981 | 152686154 |
| LIT | NM_033071 | SYNE1 | chr6 | 152688352 | 152688517 |
| LIT | NM_033071 | SYNE1 | chr6 | 152690106 | 152690262 |
| LIT | NM_033071 | SYNE1 | chr6 | 152690605 | 152690749 |
| LIT | NM_033071 | SYNE1 | chr6 | 152694171 | 152694354 |
| LIT | NM_033071 | SYNE1 | chr6 | 152697515 | 152697693 |
| LIT | NM_033071 | SYNE1 | chr6 | 152697910 | 152698047 |
| LIT | NM_033071 | SYNE1 | chr6 | 152702140 | 152702497 |
| LIT | NM_033071 | SYNE1 | chr6 | 152706808 | 152706973 |
| LIT | NM_033071 | SYNE1 | chr6 | 152708206 | 152708516 |
| LIT | NM_033071 | SYNE1 | chr6 | 152711414 | 152711587 |
| LIT | NM_033071 | SYNE1 | chr6 | 152712411 | 152712703 |
| LIT | NM_033071 | SYNE1 | chr6 | 152716650 | 152716806 |
| LIT | NM_033071 | SYNE1 | chr6 | 152717909 | 152718115 |
| LIT | NM_033071 | SYNE1 | chr6 | 152719753 | 152719866 |
| LIT | NM_033071 | SYNE1 | chr6 | 152720750 | 152720958 |
| LIT | NM_033071 | SYNE1 | chr6 | 152722272 | 152722476 |
| LIT | NM_033071 | SYNE1 | chr6 | 152725347 | 152725449 |
| LIT | NM_033071 | SYNE1 | chr6 | 152728148 | 152728331 |
| LIT | NM_033071 | SYNE1 | chr6 | 152730202 | 152730361 |
| LIT | NM_033071 | SYNE1 | chr6 | 152730693 | 152730844 |
| LIT | NM_033071 | SYNE1 | chr6 | 152734486 | 152734666 |
| LIT | NM_033071 | SYNE1 | chr6 | 152737521 | 152738150 |
| LIT | NM_033071 | SYNE1 | chr6 | 152740703 | 152740857 |
| LIT | NM_033071 | SYNE1 | chr6 | 152746515 | 152746682 |
| LIT | NM_033071 | SYNE1 | chr6 | 152748827 | 152748951 |
| LIT | NM_033071 | SYNE1 | chr6 | 152749339 | 152749527 |
| LIT | NM_033071 | SYNE1 | chr6 | 152751246 | 152751345 |
| LIT | NM_033071 | SYNE1 | chr6 | 152751616 | 152751844 |
| LIT | NM_033071 | SYNE1 | chr6 | 152754929 | 152755080 |
| LIT | NM_033071 | SYNE1 | chr6 | 152757075 | 152757236 |
| LIT | NM_033071 | SYNE1 | chr6 | 152762264 | 152762405 |
| LIT | NM_033071 | SYNE1 | chr6 | 152763209 | 152763380 |
| LIT | NM_033071 | SYNE1 | chr6 | 152765545 | 152765713 |
| LIT | NM_033071 | SYNE1 | chr6 | 152768592 | 152768757 |
| LIT | NM_033071 | SYNE1 | chr6 | 152770667 | 152770776 |
| LIT | NM_033071 | SYNE1 | chr6 | 152771759 | 152771968 |
| LIT | NM_033071 | SYNE1 | chr6 | 152772181 | 152772340 |
| LIT | NM_033071 | SYNE1 | chr6 | 152774720 | 152774855 |
| LIT | NM_033071 | SYNE1 | chr6 | 152776560 | 152776725 |
| LIT | NM_033071 | SYNE1 | chr6 | 152777020 | 152777179 |

|     |              |          |       |           |           |
|-----|--------------|----------|-------|-----------|-----------|
| LIT | NM_033071    | SYNE1    | chr6  | 152779891 | 152780065 |
| LIT | NM_033071    | SYNE1    | chr6  | 152782731 | 152782875 |
| LIT | NM_033071    | SYNE1    | chr6  | 152783872 | 152784025 |
| LIT | NM_033071    | SYNE1    | chr6  | 152784487 | 152784652 |
| LIT | NM_033071    | SYNE1    | chr6  | 152786392 | 152786595 |
| LIT | NM_033071    | SYNE1    | chr6  | 152787116 | 152787213 |
| LIT | NM_033071    | SYNE1    | chr6  | 152792731 | 152792900 |
| LIT | NM_033071    | SYNE1    | chr6  | 152793435 | 152793548 |
| LIT | NM_033071    | SYNE1    | chr6  | 152804219 | 152804384 |
| LIT | NM_033071    | SYNE1    | chr6  | 152805969 | 152806107 |
| LIT | NM_033071    | SYNE1    | chr6  | 152809530 | 152809638 |
| LIT | NM_033071    | SYNE1    | chr6  | 152819876 | 152819927 |
| LIT | NM_033071    | SYNE1    | chr6  | 152823767 | 152823877 |
| LIT | NM_033071    | SYNE1    | chr6  | 152826335 | 152826532 |
| LIT | NM_033071    | SYNE1    | chr6  | 152831327 | 152831506 |
| LIT | NM_033071    | SYNE1    | chr6  | 152832145 | 152832238 |
| LIT | NM_033071    | SYNE1    | chr6  | 152832705 | 152832726 |
| LIT | NM_033071    | SYNE1    | chr6  | 152841593 | 152841677 |
| LIT | NM_033071    | SYNE1    | chr6  | 152847214 | 152847310 |
| LIT | NM_033071    | SYNE1    | chr6  | 152861094 | 152861156 |
| LIT | NM_033071    | SYNE1    | chr6  | 152949399 | 152949689 |
| LIT | NM_033071    | SYNE1    | chr6  | 152957772 | 152957986 |
| SMG | NM_006754    | SYPL1    | chr7  | 105730813 | 105732385 |
| SMG | NM_006754    | SYPL1    | chr7  | 105733394 | 105733583 |
| SMG | NM_006754    | SYPL1    | chr7  | 105738135 | 105738343 |
| SMG | NM_006754    | SYPL1    | chr7  | 105739603 | 105739728 |
| SMG | NM_006754    | SYPL1    | chr7  | 105752585 | 105752657 |
| SMG | NM_006754    | SYPL1    | chr7  | 105752924 | 105753093 |
| SMG | NM_031914    | SYT16    | chr14 | 62462540  | 62463260  |
| SMG | NM_031914    | SYT16    | chr14 | 62536320  | 62536533  |
| SMG | NM_031914    | SYT16    | chr14 | 62541852  | 62542109  |
| SMG | NM_031914    | SYT16    | chr14 | 62547551  | 62547992  |
| SMG | NM_031914    | SYT16    | chr14 | 62550913  | 62551103  |
| SMG | NM_031914    | SYT16    | chr14 | 62567111  | 62568427  |
| SMG | NM_153809    | TAF1L    | chr9  | 32629451  | 32635667  |
| SMG | NM_023921    | TAS2R10  | chr12 | 10977944  | 10978868  |
| SMG | NM_001256508 | TBC1D10C | chr11 | 67171383  | 67171411  |
| SMG | NM_001256508 | TBC1D10C | chr11 | 67171661  | 67171825  |
| SMG | NM_001256508 | TBC1D10C | chr11 | 67172555  | 67172655  |
| SMG | NM_001256508 | TBC1D10C | chr11 | 67172869  | 67172977  |
| SMG | NM_001256508 | TBC1D10C | chr11 | 67173065  | 67173172  |
| SMG | NM_001256508 | TBC1D10C | chr11 | 67173377  | 67173488  |
| SMG | NM_001256508 | TBC1D10C | chr11 | 67174097  | 67174163  |

|     |              |          |       |           |           |
|-----|--------------|----------|-------|-----------|-----------|
| SMG | NM_001256508 | TBC1D10C | chr11 | 67176449  | 67176604  |
| SMG | NM_001256508 | TBC1D10C | chr11 | 67176877  | 67177561  |
| LIT | NM_001109878 | TBX22    | chrX  | 79270254  | 79270386  |
| LIT | NM_001109878 | TBX22    | chrX  | 79277766  | 79277943  |
| LIT | NM_001109878 | TBX22    | chrX  | 79278558  | 79278739  |
| LIT | NM_001109878 | TBX22    | chrX  | 79279561  | 79279663  |
| LIT | NM_001109878 | TBX22    | chrX  | 79281101  | 79281276  |
| LIT | NM_001109878 | TBX22    | chrX  | 79282202  | 79282367  |
| LIT | NM_001109878 | TBX22    | chrX  | 79282754  | 79282819  |
| LIT | NM_001109878 | TBX22    | chrX  | 79283489  | 79283575  |
| LIT | NM_001109878 | TBX22    | chrX  | 79285996  | 79287268  |
| LIT | NM_001040006 | TCERG1   | chr5  | 145826872 | 145826971 |
| LIT | NM_001040006 | TCERG1   | chr5  | 145834618 | 145834844 |
| LIT | NM_001040006 | TCERG1   | chr5  | 145836745 | 145836898 |
| LIT | NM_001040006 | TCERG1   | chr5  | 145838446 | 145838900 |
| LIT | NM_001040006 | TCERG1   | chr5  | 145843113 | 145843356 |
| LIT | NM_001040006 | TCERG1   | chr5  | 145849106 | 145849307 |
| LIT | NM_001040006 | TCERG1   | chr5  | 145850198 | 145850311 |
| LIT | NM_001040006 | TCERG1   | chr5  | 145851050 | 145851139 |
| LIT | NM_001040006 | TCERG1   | chr5  | 145858055 | 145858216 |
| LIT | NM_001040006 | TCERG1   | chr5  | 145859417 | 145859474 |
| LIT | NM_001040006 | TCERG1   | chr5  | 145859590 | 145859657 |
| LIT | NM_001040006 | TCERG1   | chr5  | 145862154 | 145862290 |
| LIT | NM_001040006 | TCERG1   | chr5  | 145863102 | 145863192 |
| LIT | NM_001040006 | TCERG1   | chr5  | 145872482 | 145872601 |
| LIT | NM_001040006 | TCERG1   | chr5  | 145878098 | 145878249 |
| LIT | NM_001040006 | TCERG1   | chr5  | 145882937 | 145883102 |
| LIT | NM_001040006 | TCERG1   | chr5  | 145883386 | 145883569 |
| LIT | NM_001040006 | TCERG1   | chr5  | 145886590 | 145886770 |
| LIT | NM_001040006 | TCERG1   | chr5  | 145887435 | 145887519 |
| LIT | NM_001040006 | TCERG1   | chr5  | 145888707 | 145888808 |
| LIT | NM_001040006 | TCERG1   | chr5  | 145890003 | 145891069 |
| SMG | NM_174937    | TCERG1L  | chr10 | 132890654 | 132891581 |
| SMG | NM_174937    | TCERG1L  | chr10 | 132896568 | 132896687 |
| SMG | NM_174937    | TCERG1L  | chr10 | 132902527 | 132902617 |
| SMG | NM_174937    | TCERG1L  | chr10 | 132915061 | 132915197 |
| SMG | NM_174937    | TCERG1L  | chr10 | 132932641 | 132932711 |
| SMG | NM_174937    | TCERG1L  | chr10 | 132944768 | 132944923 |
| SMG | NM_174937    | TCERG1L  | chr10 | 132961384 | 132961473 |
| SMG | NM_174937    | TCERG1L  | chr10 | 132965059 | 132965148 |
| SMG | NM_174937    | TCERG1L  | chr10 | 133058521 | 133058707 |
| SMG | NM_174937    | TCERG1L  | chr10 | 133106473 | 133106654 |
| SMG | NM_174937    | TCERG1L  | chr10 | 133107415 | 133107562 |

|     |              |         |       |           |           |
|-----|--------------|---------|-------|-----------|-----------|
| SMG | NM_174937    | TCERG1L | chr10 | 133109556 | 133109984 |
| SMG | NM_001146274 | TCF7L2  | chr10 | 114710008 | 114710704 |
| SMG | NM_001146274 | TCF7L2  | chr10 | 114710965 | 114711032 |
| SMG | NM_001146274 | TCF7L2  | chr10 | 114711241 | 114711366 |
| SMG | NM_001146274 | TCF7L2  | chr10 | 114724314 | 114724383 |
| SMG | NM_001146274 | TCF7L2  | chr10 | 114799783 | 114799885 |
| SMG | NM_001146274 | TCF7L2  | chr10 | 114900942 | 114901075 |
| SMG | NM_001146274 | TCF7L2  | chr10 | 114903681 | 114903784 |
| SMG | NM_001146274 | TCF7L2  | chr10 | 114905769 | 114905856 |
| SMG | NM_001146274 | TCF7L2  | chr10 | 114910756 | 114910882 |
| SMG | NM_001146274 | TCF7L2  | chr10 | 114911483 | 114911643 |
| SMG | NM_001146274 | TCF7L2  | chr10 | 114912091 | 114912199 |
| SMG | NM_001146274 | TCF7L2  | chr10 | 114917779 | 114917828 |
| SMG | NM_001146274 | TCF7L2  | chr10 | 114920377 | 114920450 |
| SMG | NM_001146274 | TCF7L2  | chr10 | 114925313 | 114927436 |
| SMG | NM_004918    | TCL1B   | chr14 | 96152753  | 96152966  |
| SMG | NM_004918    | TCL1B   | chr14 | 96157072  | 96157243  |
| SMG | NM_004918    | TCL1B   | chr14 | 96157604  | 96157673  |
| SMG | NM_004918    | TCL1B   | chr14 | 96158267  | 96158980  |
| SMG | NM_001146071 | TDRD3   | chr13 | 60970590  | 60971144  |
| SMG | NM_001146071 | TDRD3   | chr13 | 61013821  | 61013906  |
| SMG | NM_001146071 | TDRD3   | chr13 | 61018820  | 61018882  |
| SMG | NM_001146071 | TDRD3   | chr13 | 61034513  | 61034674  |
| SMG | NM_001146071 | TDRD3   | chr13 | 61041371  | 61041513  |
| SMG | NM_001146071 | TDRD3   | chr13 | 61057908  | 61057980  |
| SMG | NM_001146071 | TDRD3   | chr13 | 61059932  | 61060082  |
| SMG | NM_001146071 | TDRD3   | chr13 | 61068568  | 61068709  |
| SMG | NM_001146071 | TDRD3   | chr13 | 61083896  | 61084053  |
| SMG | NM_001146071 | TDRD3   | chr13 | 61084763  | 61084889  |
| SMG | NM_001146071 | TDRD3   | chr13 | 61102500  | 61103351  |
| SMG | NM_001146071 | TDRD3   | chr13 | 61109241  | 61109367  |
| SMG | NM_001146071 | TDRD3   | chr13 | 61141658  | 61141784  |
| SMG | NM_001146071 | TDRD3   | chr13 | 61147746  | 61148013  |
| CNV | NR_038328    | TEKT4P2 | chr21 | 9907188   | 9907492   |
| CNV | NR_038328    | TEKT4P2 | chr21 | 9909046   | 9909277   |
| CNV | NR_038328    | TEKT4P2 | chr21 | 9966321   | 9966380   |
| CNV | NR_038328    | TEKT4P2 | chr21 | 9968515   | 9968593   |
| SMG | NM_144674    | TEKT5   | chr16 | 10721360  | 10721656  |
| SMG | NM_144674    | TEKT5   | chr16 | 10729620  | 10729775  |
| SMG | NM_144674    | TEKT5   | chr16 | 10769815  | 10770038  |
| SMG | NM_144674    | TEKT5   | chr16 | 10775849  | 10775993  |
| SMG | NM_144674    | TEKT5   | chr16 | 10783109  | 10783180  |
| SMG | NM_144674    | TEKT5   | chr16 | 10783798  | 10783882  |



|     |              |         |       |           |           |
|-----|--------------|---------|-------|-----------|-----------|
| SMG | NM_144674    | TEKT5   | chr16 | 10788166  | 10788802  |
| LIT | NM_001130916 | TGFBR1  | chr9  | 101867411 | 101867584 |
| LIT | NM_001130916 | TGFBR1  | chr9  | 101891136 | 101891382 |
| LIT | NM_001130916 | TGFBR1  | chr9  | 101900140 | 101900371 |
| LIT | NM_001130916 | TGFBR1  | chr9  | 101904817 | 101904985 |
| LIT | NM_001130916 | TGFBR1  | chr9  | 101907013 | 101907170 |
| LIT | NM_001130916 | TGFBR1  | chr9  | 101908766 | 101908891 |
| LIT | NM_001130916 | TGFBR1  | chr9  | 101909935 | 101910066 |
| LIT | NM_001130916 | TGFBR1  | chr9  | 101911461 | 101916473 |
| SMG | NM_001024847 | TGFBR2  | chr3  | 30647993  | 30648469  |
| SMG | NM_001024847 | TGFBR2  | chr3  | 30664690  | 30664765  |
| SMG | NM_001024847 | TGFBR2  | chr3  | 30686238  | 30686407  |
| SMG | NM_001024847 | TGFBR2  | chr3  | 30691761  | 30691952  |
| SMG | NM_001024847 | TGFBR2  | chr3  | 30713129  | 30713929  |
| SMG | NM_001024847 | TGFBR2  | chr3  | 30715596  | 30715738  |
| SMG | NM_001024847 | TGFBR2  | chr3  | 30729875  | 30730003  |
| SMG | NM_001024847 | TGFBR2  | chr3  | 30732911  | 30735633  |
| SMG | NM_174886    | TGIF1   | chr18 | 3411924   | 3412252   |
| SMG | NM_174886    | TGIF1   | chr18 | 3418140   | 3418213   |
| SMG | NM_174886    | TGIF1   | chr18 | 3456351   | 3456578   |
| SMG | NM_174886    | TGIF1   | chr18 | 3457362   | 3458406   |
| SMG | NM_001130475 | THAP5   | chr7  | 108202670 | 108205549 |
| SMG | NM_001130475 | THAP5   | chr7  | 108206273 | 108206466 |
| SMG | NM_001130475 | THAP5   | chr7  | 108209933 | 108210167 |
| SMG | NM_173799    | TIGIT   | chr3  | 114012832 | 114012969 |
| SMG | NM_173799    | TIGIT   | chr3  | 114014391 | 114014721 |
| SMG | NM_173799    | TIGIT   | chr3  | 114018443 | 114018550 |
| SMG | NM_173799    | TIGIT   | chr3  | 114026741 | 114029135 |
| SMG | NM_001167947 | TIMM17B | chrX  | 48750729  | 48751100  |
| SMG | NM_001167947 | TIMM17B | chrX  | 48751182  | 48751293  |
| SMG | NM_001167947 | TIMM17B | chrX  | 48751379  | 48751508  |
| SMG | NM_001167947 | TIMM17B | chrX  | 48752320  | 48752384  |
| SMG | NM_001167947 | TIMM17B | chrX  | 48752634  | 48752784  |
| SMG | NM_001167947 | TIMM17B | chrX  | 48754041  | 48754141  |
| SMG | NM_001167947 | TIMM17B | chrX  | 48755006  | 48755104  |
| SMG | NM_001167947 | TIMM17B | chrX  | 48755349  | 48755426  |
| LIT | NM_003257    | TJP1    | chr15 | 29992356  | 29993893  |
| LIT | NM_003257    | TJP1    | chr15 | 29996425  | 29996509  |
| LIT | NM_003257    | TJP1    | chr15 | 29997731  | 29997949  |
| LIT | NM_003257    | TJP1    | chr15 | 30000762  | 30001240  |
| LIT | NM_003257    | TJP1    | chr15 | 30003034  | 30003204  |
| LIT | NM_003257    | TJP1    | chr15 | 30008814  | 30009042  |
| LIT | NM_003257    | TJP1    | chr15 | 30010224  | 30010322  |

|     |              |          |       |           |           |
|-----|--------------|----------|-------|-----------|-----------|
| LIT | NM_003257    | TJP1     | chr15 | 30010469  | 30011342  |
| LIT | NM_003257    | TJP1     | chr15 | 30011980  | 30012220  |
| LIT | NM_003257    | TJP1     | chr15 | 30012561  | 30012912  |
| LIT | NM_003257    | TJP1     | chr15 | 30018582  | 30018683  |
| LIT | NM_003257    | TJP1     | chr15 | 30018984  | 30019195  |
| LIT | NM_003257    | TJP1     | chr15 | 30020140  | 30020223  |
| LIT | NM_003257    | TJP1     | chr15 | 30024636  | 30024732  |
| LIT | NM_003257    | TJP1     | chr15 | 30024834  | 30025019  |
| LIT | NM_003257    | TJP1     | chr15 | 30025297  | 30025517  |
| LIT | NM_003257    | TJP1     | chr15 | 30026477  | 30026586  |
| LIT | NM_003257    | TJP1     | chr15 | 30029467  | 30029618  |
| LIT | NM_003257    | TJP1     | chr15 | 30033534  | 30033640  |
| LIT | NM_003257    | TJP1     | chr15 | 30034845  | 30034985  |
| LIT | NM_003257    | TJP1     | chr15 | 30053341  | 30053489  |
| LIT | NM_003257    | TJP1     | chr15 | 30053803  | 30053972  |
| LIT | NM_003257    | TJP1     | chr15 | 30054537  | 30054641  |
| LIT | NM_003257    | TJP1     | chr15 | 30058468  | 30058745  |
| LIT | NM_003257    | TJP1     | chr15 | 30064266  | 30064369  |
| LIT | NM_003257    | TJP1     | chr15 | 30065435  | 30065560  |
| LIT | NM_003257    | TJP1     | chr15 | 30092848  | 30092905  |
| LIT | NM_003257    | TJP1     | chr15 | 30114204  | 30114706  |
| SMG | NM_006815    | TMED2    | chr12 | 124069075 | 124069363 |
| SMG | NM_006815    | TMED2    | chr12 | 124071293 | 124071486 |
| SMG | NM_006815    | TMED2    | chr12 | 124074888 | 124074996 |
| SMG | NM_006815    | TMED2    | chr12 | 124081151 | 124082688 |
| SMG | NM_178520    | TMEM105  | chr17 | 79285071  | 79287785  |
| SMG | NM_178520    | TMEM105  | chr17 | 79288207  | 79288281  |
| SMG | NM_178520    | TMEM105  | chr17 | 79303943  | 79304474  |
| SMG | NM_152390    | TMEM178A | chr2  | 39893034  | 39893514  |
| SMG | NM_152390    | TMEM178A | chr2  | 39931220  | 39931334  |
| SMG | NM_152390    | TMEM178A | chr2  | 39934188  | 39934326  |
| SMG | NM_152390    | TMEM178A | chr2  | 39944149  | 39945104  |
| CNV | NM_001270370 | TMEM254  | chr10 | 81838401  | 81838542  |
| CNV | NM_001270370 | TMEM254  | chr10 | 81841596  | 81841700  |
| CNV | NM_001270370 | TMEM254  | chr10 | 81841900  | 81841960  |
| CNV | NM_001270370 | TMEM254  | chr10 | 81845986  | 81846014  |
| CNV | NM_001270370 | TMEM254  | chr10 | 81850135  | 81850187  |
| CNV | NM_001270370 | TMEM254  | chr10 | 81850552  | 81852307  |
| SMG | NM_018710    | TMEM55A  | chr8  | 92006501  | 92008048  |
| SMG | NM_018710    | TMEM55A  | chr8  | 92008881  | 92008972  |
| SMG | NM_018710    | TMEM55A  | chr8  | 92020970  | 92021023  |
| SMG | NM_018710    | TMEM55A  | chr8  | 92030617  | 92030741  |
| SMG | NM_018710    | TMEM55A  | chr8  | 92032384  | 92032491  |

|     |              |          |       |           |           |
|-----|--------------|----------|-------|-----------|-----------|
| SMG | NM_018710    | TMEM55A  | chr8  | 92033483  | 92033632  |
| SMG | NM_018710    | TMEM55A  | chr8  | 92052871  | 92053203  |
| SMG | NM_001077263 | TMPRSS13 | chr11 | 117771355 | 117772980 |
| SMG | NM_001077263 | TMPRSS13 | chr11 | 117774369 | 117774522 |
| SMG | NM_001077263 | TMPRSS13 | chr11 | 117774673 | 117774816 |
| SMG | NM_001077263 | TMPRSS13 | chr11 | 117776352 | 117776451 |
| SMG | NM_001077263 | TMPRSS13 | chr11 | 117779326 | 117779499 |
| SMG | NM_001077263 | TMPRSS13 | chr11 | 117780520 | 117780683 |
| SMG | NM_001077263 | TMPRSS13 | chr11 | 117781421 | 117781465 |
| SMG | NM_001077263 | TMPRSS13 | chr11 | 117782482 | 117782575 |
| SMG | NM_001077263 | TMPRSS13 | chr11 | 117784491 | 117784621 |
| SMG | NM_001077263 | TMPRSS13 | chr11 | 117785106 | 117785229 |
| SMG | NM_001077263 | TMPRSS13 | chr11 | 117787884 | 117787989 |
| SMG | NM_001077263 | TMPRSS13 | chr11 | 117789123 | 117789553 |
| SMG | NM_001077263 | TMPRSS13 | chr11 | 117800001 | 117800168 |
| CNV | NM_019022    | TMX3     | chr18 | 66340924  | 66344430  |
| CNV | NM_019022    | TMX3     | chr18 | 66346699  | 66346768  |
| CNV | NM_019022    | TMX3     | chr18 | 66348217  | 66348347  |
| CNV | NM_019022    | TMX3     | chr18 | 66350161  | 66350218  |
| CNV | NM_019022    | TMX3     | chr18 | 66351426  | 66351480  |
| CNV | NM_019022    | TMX3     | chr18 | 66351664  | 66351722  |
| CNV | NM_019022    | TMX3     | chr18 | 66354903  | 66355002  |
| CNV | NM_019022    | TMX3     | chr18 | 66358531  | 66358598  |
| CNV | NM_019022    | TMX3     | chr18 | 66364462  | 66364540  |
| CNV | NM_019022    | TMX3     | chr18 | 66365168  | 66365268  |
| CNV | NM_019022    | TMX3     | chr18 | 66367641  | 66367722  |
| CNV | NM_019022    | TMX3     | chr18 | 66368981  | 66369027  |
| CNV | NM_019022    | TMX3     | chr18 | 66377257  | 66377381  |
| CNV | NM_019022    | TMX3     | chr18 | 66378600  | 66378640  |
| CNV | NM_019022    | TMX3     | chr18 | 66381082  | 66381137  |
| CNV | NM_019022    | TMX3     | chr18 | 66382172  | 66382353  |
| LIT | NM_001270507 | TNFAIP3  | chr6  | 138188324 | 138188655 |
| LIT | NM_001270507 | TNFAIP3  | chr6  | 138192349 | 138192659 |
| LIT | NM_001270507 | TNFAIP3  | chr6  | 138195981 | 138196172 |
| LIT | NM_001270507 | TNFAIP3  | chr6  | 138196824 | 138196972 |
| LIT | NM_001270507 | TNFAIP3  | chr6  | 138197132 | 138197303 |
| LIT | NM_001270507 | TNFAIP3  | chr6  | 138198212 | 138198393 |
| LIT | NM_001270507 | TNFAIP3  | chr6  | 138199568 | 138200488 |
| LIT | NM_001270507 | TNFAIP3  | chr6  | 138201207 | 138201389 |
| LIT | NM_001270507 | TNFAIP3  | chr6  | 138202171 | 138204451 |
| CNV | NM_007115    | TNFAIP6  | chr2  | 152214105 | 152214274 |
| CNV | NM_007115    | TNFAIP6  | chr2  | 152220456 | 152220594 |
| CNV | NM_007115    | TNFAIP6  | chr2  | 152222569 | 152222731 |

|     |              |           |       |           |           |
|-----|--------------|-----------|-------|-----------|-----------|
| CNV | NM_007115    | TNFAIP6   | chr2  | 152226533 | 152226762 |
| CNV | NM_007115    | TNFAIP6   | chr2  | 152230062 | 152230103 |
| CNV | NM_007115    | TNFAIP6   | chr2  | 152235877 | 152236562 |
| SMG | NM_003841    | TNFRSF10C | chr8  | 22960326  | 22960694  |
| SMG | NM_003841    | TNFRSF10C | chr8  | 22969232  | 22969338  |
| SMG | NM_003841    | TNFRSF10C | chr8  | 22972169  | 22972283  |
| SMG | NM_003841    | TNFRSF10C | chr8  | 22973020  | 22973129  |
| SMG | NM_003841    | TNFRSF10C | chr8  | 22974153  | 22974950  |
| SMG | NM_014452    | TNFRSF21  | chr6  | 47199262  | 47200730  |
| SMG | NM_014452    | TNFRSF21  | chr6  | 47202405  | 47202634  |
| SMG | NM_014452    | TNFRSF21  | chr6  | 47220991  | 47221257  |
| SMG | NM_014452    | TNFRSF21  | chr6  | 47251673  | 47252168  |
| SMG | NM_014452    | TNFRSF21  | chr6  | 47253679  | 47254331  |
| SMG | NM_014452    | TNFRSF21  | chr6  | 47277151  | 47277683  |
| SMG | NM_001198622 | TNFSF13   | chr17 | 7461608   | 7462614   |
| SMG | NM_001198622 | TNFSF13   | chr17 | 7463164   | 7463210   |
| SMG | NM_001198622 | TNFSF13   | chr17 | 7463365   | 7463484   |
| SMG | NM_001198622 | TNFSF13   | chr17 | 7463666   | 7463805   |
| SMG | NM_001198622 | TNFSF13   | chr17 | 7464040   | 7464925   |
| SMG | NM_000364    | TNNT2     | chr1  | 201328135 | 201328383 |
| SMG | NM_000364    | TNNT2     | chr1  | 201328750 | 201328791 |
| SMG | NM_000364    | TNNT2     | chr1  | 201330406 | 201330497 |
| SMG | NM_000364    | TNNT2     | chr1  | 201331040 | 201331150 |
| SMG | NM_000364    | TNNT2     | chr1  | 201332423 | 201332534 |
| SMG | NM_000364    | TNNT2     | chr1  | 201333425 | 201333503 |
| SMG | NM_000364    | TNNT2     | chr1  | 201334318 | 201334435 |
| SMG | NM_000364    | TNNT2     | chr1  | 201334737 | 201334798 |
| SMG | NM_000364    | TNNT2     | chr1  | 201335965 | 201335999 |
| SMG | NM_000364    | TNNT2     | chr1  | 201336898 | 201336934 |
| SMG | NM_000364    | TNNT2     | chr1  | 201337289 | 201337355 |
| SMG | NM_000364    | TNNT2     | chr1  | 201338943 | 201338973 |
| SMG | NM_000364    | TNNT2     | chr1  | 201341154 | 201341169 |
| SMG | NM_000364    | TNNT2     | chr1  | 201341272 | 201341283 |
| SMG | NM_000364    | TNNT2     | chr1  | 201342341 | 201342396 |
| SMG | NM_000364    | TNNT2     | chr1  | 201346750 | 201346828 |
| SMG | NM_001068    | TOP2B     | chr3  | 25639395  | 25639968  |
| SMG | NM_001068    | TOP2B     | chr3  | 25640925  | 25641020  |
| SMG | NM_001068    | TOP2B     | chr3  | 25642590  | 25642716  |
| SMG | NM_001068    | TOP2B     | chr3  | 25646250  | 25646361  |
| SMG | NM_001068    | TOP2B     | chr3  | 25647533  | 25647613  |
| SMG | NM_001068    | TOP2B     | chr3  | 25648661  | 25648866  |
| SMG | NM_001068    | TOP2B     | chr3  | 25650673  | 25650835  |
| SMG | NM_001068    | TOP2B     | chr3  | 25651058  | 25651203  |

|     |              |       |       |           |           |
|-----|--------------|-------|-------|-----------|-----------|
| SMG | NM_001068    | TOP2B | chr3  | 25654005  | 25654200  |
| SMG | NM_001068    | TOP2B | chr3  | 25656695  | 25656779  |
| SMG | NM_001068    | TOP2B | chr3  | 25656921  | 25657077  |
| SMG | NM_001068    | TOP2B | chr3  | 25659908  | 25660000  |
| SMG | NM_001068    | TOP2B | chr3  | 25660144  | 25660340  |
| SMG | NM_001068    | TOP2B | chr3  | 25661352  | 25661553  |
| SMG | NM_001068    | TOP2B | chr3  | 25662172  | 25662307  |
| SMG | NM_001068    | TOP2B | chr3  | 25665005  | 25665237  |
| SMG | NM_001068    | TOP2B | chr3  | 25665787  | 25665936  |
| SMG | NM_001068    | TOP2B | chr3  | 25666172  | 25666294  |
| SMG | NM_001068    | TOP2B | chr3  | 25668050  | 25668165  |
| SMG | NM_001068    | TOP2B | chr3  | 25668262  | 25668355  |
| SMG | NM_001068    | TOP2B | chr3  | 25668677  | 25668787  |
| SMG | NM_001068    | TOP2B | chr3  | 25670337  | 25670443  |
| SMG | NM_001068    | TOP2B | chr3  | 25670525  | 25670636  |
| SMG | NM_001068    | TOP2B | chr3  | 25671519  | 25671645  |
| SMG | NM_001068    | TOP2B | chr3  | 25671802  | 25671960  |
| SMG | NM_001068    | TOP2B | chr3  | 25672291  | 25672430  |
| SMG | NM_001068    | TOP2B | chr3  | 25673936  | 25674074  |
| SMG | NM_001068    | TOP2B | chr3  | 25674183  | 25674285  |
| SMG | NM_001068    | TOP2B | chr3  | 25675331  | 25675505  |
| SMG | NM_001068    | TOP2B | chr3  | 25677426  | 25677639  |
| SMG | NM_001068    | TOP2B | chr3  | 25678705  | 25678803  |
| SMG | NM_001068    | TOP2B | chr3  | 25679655  | 25679801  |
| SMG | NM_001068    | TOP2B | chr3  | 25683812  | 25683876  |
| SMG | NM_001068    | TOP2B | chr3  | 25685184  | 25685275  |
| SMG | NM_001068    | TOP2B | chr3  | 25686790  | 25686946  |
| SMG | NM_001068    | TOP2B | chr3  | 25705719  | 25705863  |
| SMG | NM_000113    | TOR1A | chr9  | 132575220 | 132576501 |
| SMG | NM_000113    | TOR1A | chr9  | 132580798 | 132580926 |
| SMG | NM_000113    | TOR1A | chr9  | 132581023 | 132581199 |
| SMG | NM_000113    | TOR1A | chr9  | 132584859 | 132585125 |
| SMG | NM_000113    | TOR1A | chr9  | 132586186 | 132586441 |
| CNV | NM_014729    | TOX   | chr8  | 59717976  | 59720342  |
| CNV | NM_014729    | TOX   | chr8  | 59720676  | 59720828  |
| CNV | NM_014729    | TOX   | chr8  | 59727896  | 59728283  |
| CNV | NM_014729    | TOX   | chr8  | 59739380  | 59739461  |
| CNV | NM_014729    | TOX   | chr8  | 59750639  | 59750870  |
| CNV | NM_014729    | TOX   | chr8  | 59764082  | 59764364  |
| CNV | NM_014729    | TOX   | chr8  | 59851860  | 59852103  |
| CNV | NM_014729    | TOX   | chr8  | 59872501  | 59872567  |
| CNV | NM_014729    | TOX   | chr8  | 60031444  | 60031767  |
| CNV | NM_001146188 | TOX3  | chr16 | 52471917  | 52473880  |

|     |              |      |       |          |          |
|-----|--------------|------|-------|----------|----------|
| CNV | NM_001146188 | TOX3 | chr16 | 52478187 | 52478268 |
| CNV | NM_001146188 | TOX3 | chr16 | 52479905 | 52480133 |
| CNV | NM_001146188 | TOX3 | chr16 | 52484188 | 52484458 |
| CNV | NM_001146188 | TOX3 | chr16 | 52497845 | 52498097 |
| CNV | NM_001146188 | TOX3 | chr16 | 52502420 | 52502486 |
| CNV | NM_001146188 | TOX3 | chr16 | 52553317 | 52553491 |
| CNV | NM_001146188 | TOX3 | chr16 | 52581625 | 52581714 |
| DRV | NM_000546    | TP53 | chr17 | 7571719  | 7573008  |
| DRV | NM_000546    | TP53 | chr17 | 7573926  | 7574033  |
| DRV | NM_000546    | TP53 | chr17 | 7576852  | 7576926  |
| DRV | NM_000546    | TP53 | chr17 | 7577018  | 7577155  |
| DRV | NM_000546    | TP53 | chr17 | 7577498  | 7577608  |
| DRV | NM_000546    | TP53 | chr17 | 7578176  | 7578289  |
| DRV | NM_000546    | TP53 | chr17 | 7578370  | 7578554  |
| DRV | NM_000546    | TP53 | chr17 | 7579311  | 7579590  |
| DRV | NM_000546    | TP53 | chr17 | 7579699  | 7579721  |
| DRV | NM_000546    | TP53 | chr17 | 7579838  | 7579940  |
| DRV | NM_000546    | TP53 | chr17 | 7590694  | 7590868  |
| CNV | NM_199259    | TPTE | chr21 | 10906742 | 10907040 |
| CNV | NM_199259    | TPTE | chr21 | 10908824 | 10908895 |
| CNV | NM_199259    | TPTE | chr21 | 10910306 | 10910399 |
| CNV | NM_199259    | TPTE | chr21 | 10914362 | 10914442 |
| CNV | NM_199259    | TPTE | chr21 | 10916369 | 10916475 |
| CNV | NM_199259    | TPTE | chr21 | 10920083 | 10920164 |
| CNV | NM_199259    | TPTE | chr21 | 10921933 | 10921995 |
| CNV | NM_199259    | TPTE | chr21 | 10933851 | 10933940 |
| CNV | NM_199259    | TPTE | chr21 | 10934038 | 10934120 |
| CNV | NM_199259    | TPTE | chr21 | 10934936 | 10934997 |
| CNV | NM_199259    | TPTE | chr21 | 10941907 | 10941972 |
| CNV | NM_199259    | TPTE | chr21 | 10942710 | 10942774 |
| CNV | NM_199259    | TPTE | chr21 | 10942920 | 10943020 |
| CNV | NM_199259    | TPTE | chr21 | 10944667 | 10944787 |
| CNV | NM_199259    | TPTE | chr21 | 10951265 | 10951427 |
| CNV | NM_199259    | TPTE | chr21 | 10952912 | 10952963 |
| CNV | NM_199259    | TPTE | chr21 | 10959740 | 10959800 |
| CNV | NM_199259    | TPTE | chr21 | 10970008 | 10970062 |
| CNV | NM_199259    | TPTE | chr21 | 10971291 | 10971345 |
| CNV | NM_199259    | TPTE | chr21 | 10973722 | 10973776 |
| CNV | NM_199259    | TPTE | chr21 | 10985044 | 10985102 |
| CNV | NM_199259    | TPTE | chr21 | 10987768 | 10987877 |
| CNV | NM_199259    | TPTE | chr21 | 10990762 | 10990920 |
| CNV | NM_012112    | TPX2 | chr20 | 30326903 | 30327424 |
| CNV | NM_012112    | TPX2 | chr20 | 30330343 | 30330450 |

|     |           |        |       |           |           |
|-----|-----------|--------|-------|-----------|-----------|
| CNV | NM_012112 | TPX2   | chr20 | 30345209  | 30345385  |
| CNV | NM_012112 | TPX2   | chr20 | 30347859  | 30347982  |
| CNV | NM_012112 | TPX2   | chr20 | 30354358  | 30354485  |
| CNV | NM_012112 | TPX2   | chr20 | 30358145  | 30358274  |
| CNV | NM_012112 | TPX2   | chr20 | 30359362  | 30359485  |
| CNV | NM_012112 | TPX2   | chr20 | 30363669  | 30363791  |
| CNV | NM_012112 | TPX2   | chr20 | 30365289  | 30365441  |
| CNV | NM_012112 | TPX2   | chr20 | 30366615  | 30366787  |
| CNV | NM_012112 | TPX2   | chr20 | 30370051  | 30370193  |
| CNV | NM_012112 | TPX2   | chr20 | 30371507  | 30371724  |
| CNV | NM_012112 | TPX2   | chr20 | 30380537  | 30380633  |
| CNV | NM_012112 | TPX2   | chr20 | 30381650  | 30381827  |
| CNV | NM_012112 | TPX2   | chr20 | 30382204  | 30382351  |
| CNV | NM_012112 | TPX2   | chr20 | 30385206  | 30385318  |
| CNV | NM_012112 | TPX2   | chr20 | 30386167  | 30386355  |
| CNV | NM_012112 | TPX2   | chr20 | 30388772  | 30389603  |
| SMG | NM_145726 | TRAF3  | chr14 | 103243815 | 103244012 |
| SMG | NM_145726 | TRAF3  | chr14 | 103296670 | 103296809 |
| SMG | NM_145726 | TRAF3  | chr14 | 103336521 | 103336783 |
| SMG | NM_145726 | TRAF3  | chr14 | 103338253 | 103338305 |
| SMG | NM_145726 | TRAF3  | chr14 | 103341960 | 103342065 |
| SMG | NM_145726 | TRAF3  | chr14 | 103342694 | 103342862 |
| SMG | NM_145726 | TRAF3  | chr14 | 103352525 | 103352606 |
| SMG | NM_145726 | TRAF3  | chr14 | 103357661 | 103357754 |
| SMG | NM_145726 | TRAF3  | chr14 | 103363597 | 103363738 |
| SMG | NM_145726 | TRAF3  | chr14 | 103369591 | 103369766 |
| SMG | NM_145726 | TRAF3  | chr14 | 103371549 | 103377837 |
| SMG | NM_004619 | TRAF5  | chr1  | 211499956 | 211500015 |
| SMG | NM_004619 | TRAF5  | chr1  | 211526580 | 211526799 |
| SMG | NM_004619 | TRAF5  | chr1  | 211527751 | 211527809 |
| SMG | NM_004619 | TRAF5  | chr1  | 211529708 | 211529810 |
| SMG | NM_004619 | TRAF5  | chr1  | 211533253 | 211533418 |
| SMG | NM_004619 | TRAF5  | chr1  | 211534043 | 211534121 |
| SMG | NM_004619 | TRAF5  | chr1  | 211534429 | 211534504 |
| SMG | NM_004619 | TRAF5  | chr1  | 211538717 | 211538810 |
| SMG | NM_004619 | TRAF5  | chr1  | 211542793 | 211542934 |
| SMG | NM_004619 | TRAF5  | chr1  | 211544643 | 211544812 |
| SMG | NM_004619 | TRAF5  | chr1  | 211545469 | 211548286 |
| SMG | NM_182985 | TRIM69 | chr15 | 45028559  | 45028908  |
| SMG | NM_182985 | TRIM69 | chr15 | 45047097  | 45047574  |
| SMG | NM_182985 | TRIM69 | chr15 | 45048565  | 45048661  |
| SMG | NM_182985 | TRIM69 | chr15 | 45050818  | 45051052  |
| SMG | NM_182985 | TRIM69 | chr15 | 45051837  | 45051860  |

|     |              |        |       |           |           |
|-----|--------------|--------|-------|-----------|-----------|
| SMG | NM_182985    | TRIM69 | chr15 | 45051945  | 45052070  |
| SMG | NM_182985    | TRIM69 | chr15 | 45059428  | 45060025  |
| SMG | NM_001039141 | TRIOBP | chr22 | 38092994  | 38093096  |
| SMG | NM_001039141 | TRIOBP | chr22 | 38093594  | 38093703  |
| SMG | NM_001039141 | TRIOBP | chr22 | 38097312  | 38097486  |
| SMG | NM_001039141 | TRIOBP | chr22 | 38106433  | 38106573  |
| SMG | NM_001039141 | TRIOBP | chr22 | 38109216  | 38109418  |
| SMG | NM_001039141 | TRIOBP | chr22 | 38111769  | 38111941  |
| SMG | NM_001039141 | TRIOBP | chr22 | 38119191  | 38122510  |
| SMG | NM_001039141 | TRIOBP | chr22 | 38129304  | 38129419  |
| SMG | NM_001039141 | TRIOBP | chr22 | 38130405  | 38131449  |
| SMG | NM_001039141 | TRIOBP | chr22 | 38134648  | 38134726  |
| SMG | NM_001039141 | TRIOBP | chr22 | 38136901  | 38137039  |
| SMG | NM_001039141 | TRIOBP | chr22 | 38147778  | 38147835  |
| SMG | NM_001039141 | TRIOBP | chr22 | 38150883  | 38150991  |
| SMG | NM_001039141 | TRIOBP | chr22 | 38151107  | 38151197  |
| SMG | NM_001039141 | TRIOBP | chr22 | 38151556  | 38151666  |
| SMG | NM_001039141 | TRIOBP | chr22 | 38153619  | 38154145  |
| SMG | NM_001039141 | TRIOBP | chr22 | 38155160  | 38155271  |
| SMG | NM_001039141 | TRIOBP | chr22 | 38161676  | 38161824  |
| SMG | NM_001039141 | TRIOBP | chr22 | 38164080  | 38164183  |
| SMG | NM_001039141 | TRIOBP | chr22 | 38165034  | 38165194  |
| SMG | NM_001039141 | TRIOBP | chr22 | 38165268  | 38165382  |
| SMG | NM_001039141 | TRIOBP | chr22 | 38167656  | 38167743  |
| SMG | NM_001039141 | TRIOBP | chr22 | 38168607  | 38168771  |
| SMG | NM_001039141 | TRIOBP | chr22 | 38169789  | 38172563  |
| SMG | NM_019083    | TRMT13 | chr1  | 100598705 | 100598871 |
| SMG | NM_019083    | TRMT13 | chr1  | 100602437 | 100602484 |
| SMG | NM_019083    | TRMT13 | chr1  | 100602574 | 100602641 |
| SMG | NM_019083    | TRMT13 | chr1  | 100605204 | 100605267 |
| SMG | NM_019083    | TRMT13 | chr1  | 100605737 | 100605807 |
| SMG | NM_019083    | TRMT13 | chr1  | 100605963 | 100606070 |
| SMG | NM_019083    | TRMT13 | chr1  | 100606407 | 100606575 |
| SMG | NM_019083    | TRMT13 | chr1  | 100608692 | 100608765 |
| SMG | NM_019083    | TRMT13 | chr1  | 100609624 | 100609699 |
| SMG | NM_019083    | TRMT13 | chr1  | 100613449 | 100613882 |
| SMG | NM_019083    | TRMT13 | chr1  | 100614180 | 100616054 |
| CNV | NM_001135955 | TRPC4  | chr13 | 38210772  | 38211368  |
| CNV | NM_001135955 | TRPC4  | chr13 | 38211620  | 38211762  |
| CNV | NM_001135955 | TRPC4  | chr13 | 38213176  | 38213266  |
| CNV | NM_001135955 | TRPC4  | chr13 | 38213394  | 38213436  |
| CNV | NM_001135955 | TRPC4  | chr13 | 38225401  | 38225596  |
| CNV | NM_001135955 | TRPC4  | chr13 | 38229224  | 38229420  |



|     |              |         |       |           |           |
|-----|--------------|---------|-------|-----------|-----------|
| CNV | NM_001135955 | TRPC4   | chr13 | 38237552  | 38237866  |
| CNV | NM_001135955 | TRPC4   | chr13 | 38248364  | 38248504  |
| CNV | NM_001135955 | TRPC4   | chr13 | 38266135  | 38266472  |
| CNV | NM_001135955 | TRPC4   | chr13 | 38320073  | 38320592  |
| CNV | NM_001135955 | TRPC4   | chr13 | 38357092  | 38357497  |
| CNV | NM_001135955 | TRPC4   | chr13 | 38443731  | 38443939  |
| SMG | NM_004621    | TRPC6   | chr11 | 101322294 | 101323837 |
| SMG | NM_004621    | TRPC6   | chr11 | 101324380 | 101324456 |
| SMG | NM_004621    | TRPC6   | chr11 | 101325748 | 101325832 |
| SMG | NM_004621    | TRPC6   | chr11 | 101340157 | 101340232 |
| SMG | NM_004621    | TRPC6   | chr11 | 101341913 | 101342117 |
| SMG | NM_004621    | TRPC6   | chr11 | 101342867 | 101343063 |
| SMG | NM_004621    | TRPC6   | chr11 | 101344239 | 101344504 |
| SMG | NM_004621    | TRPC6   | chr11 | 101347031 | 101347265 |
| SMG | NM_004621    | TRPC6   | chr11 | 101353679 | 101353896 |
| SMG | NM_004621    | TRPC6   | chr11 | 101359667 | 101359832 |
| SMG | NM_004621    | TRPC6   | chr11 | 101362286 | 101362469 |
| SMG | NM_004621    | TRPC6   | chr11 | 101374754 | 101375529 |
| SMG | NM_004621    | TRPC6   | chr11 | 101454064 | 101454659 |
| SMG | NM_014779    | TSC22D2 | chr3  | 150126787 | 150129095 |
| SMG | NM_014779    | TSC22D2 | chr3  | 150140835 | 150140907 |
| SMG | NM_014779    | TSC22D2 | chr3  | 150174862 | 150174914 |
| SMG | NM_014779    | TSC22D2 | chr3  | 150176162 | 150177615 |
| SMG | NM_006292    | TSG101  | chr11 | 18501857  | 18502182  |
| SMG | NM_006292    | TSG101  | chr11 | 18503176  | 18503416  |
| SMG | NM_006292    | TSG101  | chr11 | 18505416  | 18505619  |
| SMG | NM_006292    | TSG101  | chr11 | 18524032  | 18524124  |
| SMG | NM_006292    | TSG101  | chr11 | 18528403  | 18528470  |
| SMG | NM_006292    | TSG101  | chr11 | 18531088  | 18531212  |
| SMG | NM_006292    | TSG101  | chr11 | 18536224  | 18536388  |
| SMG | NM_006292    | TSG101  | chr11 | 18537645  | 18537711  |
| SMG | NM_006292    | TSG101  | chr11 | 18541065  | 18541150  |
| SMG | NM_006292    | TSG101  | chr11 | 18548321  | 18548503  |
| DRV | NM_000369    | TSHR    | chr14 | 81421868  | 81422194  |
| DRV | NM_000369    | TSHR    | chr14 | 81528491  | 81528563  |
| DRV | NM_000369    | TSHR    | chr14 | 81534597  | 81534672  |
| DRV | NM_000369    | TSHR    | chr14 | 81554297  | 81554372  |
| DRV | NM_000369    | TSHR    | chr14 | 81557412  | 81557487  |
| DRV | NM_000369    | TSHR    | chr14 | 81558874  | 81558952  |
| DRV | NM_000369    | TSHR    | chr14 | 81562982  | 81563051  |
| DRV | NM_000369    | TSHR    | chr14 | 81574718  | 81574796  |
| DRV | NM_000369    | TSHR    | chr14 | 81606022  | 81606211  |
| DRV | NM_000369    | TSHR    | chr14 | 81609283  | 81612646  |

|     |              |        |       |           |           |
|-----|--------------|--------|-------|-----------|-----------|
| CNV | NM_020856    | TSHZ3  | chr19 | 31765850  | 31770658  |
| CNV | NM_020856    | TSHZ3  | chr19 | 31840085  | 31840190  |
| CNV | NM_001168320 | TSPAN9 | chr12 | 3186520   | 3186619   |
| CNV | NM_001168320 | TSPAN9 | chr12 | 3310342   | 3310422   |
| CNV | NM_001168320 | TSPAN9 | chr12 | 3387586   | 3387778   |
| CNV | NM_001168320 | TSPAN9 | chr12 | 3388157   | 3388232   |
| CNV | NM_001168320 | TSPAN9 | chr12 | 3389547   | 3389649   |
| CNV | NM_001168320 | TSPAN9 | chr12 | 3390363   | 3390495   |
| CNV | NM_001168320 | TSPAN9 | chr12 | 3390899   | 3390983   |
| CNV | NM_001168320 | TSPAN9 | chr12 | 3392210   | 3395730   |
| SMG | NM_021648    | TSPYL4 | chr6  | 116571130 | 116575261 |
| LIT | NM_173500    | TTBK2  | chr15 | 43036541  | 43038455  |
| LIT | NM_173500    | TTBK2  | chr15 | 43044171  | 43045445  |
| LIT | NM_173500    | TTBK2  | chr15 | 43067332  | 43067921  |
| LIT | NM_173500    | TTBK2  | chr15 | 43069228  | 43069440  |
| LIT | NM_173500    | TTBK2  | chr15 | 43075616  | 43075833  |
| LIT | NM_173500    | TTBK2  | chr15 | 43086841  | 43086999  |
| LIT | NM_173500    | TTBK2  | chr15 | 43102811  | 43102937  |
| LIT | NM_173500    | TTBK2  | chr15 | 43103885  | 43103978  |
| LIT | NM_173500    | TTBK2  | chr15 | 43109229  | 43109295  |
| LIT | NM_173500    | TTBK2  | chr15 | 43120125  | 43120230  |
| LIT | NM_173500    | TTBK2  | chr15 | 43122135  | 43122276  |
| LIT | NM_173500    | TTBK2  | chr15 | 43132557  | 43132631  |
| LIT | NM_173500    | TTBK2  | chr15 | 43164808  | 43164956  |
| LIT | NM_173500    | TTBK2  | chr15 | 43170746  | 43170882  |
| LIT | NM_173500    | TTBK2  | chr15 | 43212635  | 43213007  |
| LIT | NM_001025930 | TTLL3  | chr3  | 9851643   | 9852078   |
| LIT | NM_001025930 | TTLL3  | chr3  | 9852304   | 9852393   |
| LIT | NM_001025930 | TTLL3  | chr3  | 9854626   | 9854795   |
| LIT | NM_001025930 | TTLL3  | chr3  | 9854931   | 9855029   |
| LIT | NM_001025930 | TTLL3  | chr3  | 9859328   | 9859443   |
| LIT | NM_001025930 | TTLL3  | chr3  | 9860505   | 9860604   |
| LIT | NM_001025930 | TTLL3  | chr3  | 9862229   | 9862425   |
| LIT | NM_001025930 | TTLL3  | chr3  | 9867483   | 9867632   |
| LIT | NM_001025930 | TTLL3  | chr3  | 9868680   | 9868924   |
| LIT | NM_001025930 | TTLL3  | chr3  | 9870643   | 9871079   |
| LIT | NM_001025930 | TTLL3  | chr3  | 9874787   | 9874929   |
| LIT | NM_001025930 | TTLL3  | chr3  | 9876364   | 9876591   |
| LIT | NM_001025930 | TTLL3  | chr3  | 9876777   | 9878040   |
| CNV | NM_001008409 | TTLL9  | chr20 | 30458504  | 30458752  |
| CNV | NM_001008409 | TTLL9  | chr20 | 30458924  | 30458998  |
| CNV | NM_001008409 | TTLL9  | chr20 | 30474998  | 30475042  |
| CNV | NM_001008409 | TTLL9  | chr20 | 30486275  | 30486368  |

|     |              |        |       |           |           |
|-----|--------------|--------|-------|-----------|-----------|
| CNV | NM_001008409 | TTLL9  | chr20 | 30496393  | 30496505  |
| CNV | NM_001008409 | TTLL9  | chr20 | 30497539  | 30497725  |
| CNV | NM_001008409 | TTLL9  | chr20 | 30507666  | 30507735  |
| CNV | NM_001008409 | TTLL9  | chr20 | 30510765  | 30510856  |
| CNV | NM_001008409 | TTLL9  | chr20 | 30512811  | 30512852  |
| CNV | NM_001008409 | TTLL9  | chr20 | 30513851  | 30513894  |
| CNV | NM_001008409 | TTLL9  | chr20 | 30521602  | 30521661  |
| CNV | NM_001008409 | TTLL9  | chr20 | 30522494  | 30522691  |
| CNV | NM_001008409 | TTLL9  | chr20 | 30525198  | 30525312  |
| CNV | NM_001008409 | TTLL9  | chr20 | 30526944  | 30527069  |
| CNV | NM_001008409 | TTLL9  | chr20 | 30530747  | 30530858  |
| SMG | NM_000371    | TTR    | chr18 | 29171729  | 29171934  |
| SMG | NM_000371    | TTR    | chr18 | 29172858  | 29172989  |
| SMG | NM_000371    | TTR    | chr18 | 29175082  | 29175218  |
| SMG | NM_000371    | TTR    | chr18 | 29178530  | 29178986  |
| SMG | NM_001171864 | TUBAL3 | chr10 | 5435060   | 5436424   |
| SMG | NM_001171864 | TUBAL3 | chr10 | 5437289   | 5437438   |
| SMG | NM_001171864 | TUBAL3 | chr10 | 5442806   | 5442930   |
| SMG | NM_001171864 | TUBAL3 | chr10 | 5446752   | 5446793   |
| SMG | NM_001007466 | TULP4  | chr6  | 158733691 | 158735300 |
| SMG | NM_001007466 | TULP4  | chr6  | 158834096 | 158834225 |
| SMG | NM_001007466 | TULP4  | chr6  | 158850767 | 158850929 |
| SMG | NM_001007466 | TULP4  | chr6  | 158870027 | 158870208 |
| SMG | NM_001007466 | TULP4  | chr6  | 158873165 | 158873300 |
| SMG | NM_001007466 | TULP4  | chr6  | 158882594 | 158882761 |
| SMG | NM_001007466 | TULP4  | chr6  | 158900782 | 158901007 |
| SMG | NM_001007466 | TULP4  | chr6  | 158902086 | 158902321 |
| SMG | NM_001007466 | TULP4  | chr6  | 158910619 | 158910764 |
| SMG | NM_001007466 | TULP4  | chr6  | 158914604 | 158914749 |
| SMG | NM_001007466 | TULP4  | chr6  | 158915784 | 158915878 |
| SMG | NM_001007466 | TULP4  | chr6  | 158919700 | 158919844 |
| SMG | NM_001007466 | TULP4  | chr6  | 158927609 | 158932856 |
| SMG | NM_001012989 | UBE2NL | chrX  | 142967172 | 142968357 |
| SMG | NM_145053    | UBQLNL | chr11 | 5535622   | 5537956   |
| SMG | NM_001168316 | UGT3A2 | chr5  | 36035118  | 36036076  |
| SMG | NM_001168316 | UGT3A2 | chr5  | 36037898  | 36038118  |
| SMG | NM_001168316 | UGT3A2 | chr5  | 36039578  | 36039810  |
| SMG | NM_001168316 | UGT3A2 | chr5  | 36048990  | 36049522  |
| SMG | NM_001168316 | UGT3A2 | chr5  | 36051971  | 36052086  |
| SMG | NM_001168316 | UGT3A2 | chr5  | 36066797  | 36067023  |
| LIT | NM_152896    | UHRF2  | chr9  | 6413150   | 6413643   |
| LIT | NM_152896    | UHRF2  | chr9  | 6420911   | 6421142   |
| LIT | NM_152896    | UHRF2  | chr9  | 6433913   | 6434173   |

|     |              |       |       |          |          |
|-----|--------------|-------|-------|----------|----------|
| LIT | NM_152896    | UHRF2 | chr9  | 6460572  | 6460791  |
| LIT | NM_152896    | UHRF2 | chr9  | 6475390  | 6475500  |
| LIT | NM_152896    | UHRF2 | chr9  | 6477621  | 6477808  |
| LIT | NM_152896    | UHRF2 | chr9  | 6481642  | 6481766  |
| LIT | NM_152896    | UHRF2 | chr9  | 6481991  | 6482099  |
| LIT | NM_152896    | UHRF2 | chr9  | 6486820  | 6486925  |
| LIT | NM_152896    | UHRF2 | chr9  | 6493825  | 6493932  |
| LIT | NM_152896    | UHRF2 | chr9  | 6497197  | 6497360  |
| LIT | NM_152896    | UHRF2 | chr9  | 6498017  | 6498158  |
| LIT | NM_152896    | UHRF2 | chr9  | 6499834  | 6499931  |
| LIT | NM_152896    | UHRF2 | chr9  | 6500551  | 6500709  |
| LIT | NM_152896    | UHRF2 | chr9  | 6504592  | 6504691  |
| LIT | NM_152896    | UHRF2 | chr9  | 6506032  | 6507051  |
| SMG | NM_001008389 | UMOD  | chr16 | 20344372 | 20344697 |
| SMG | NM_001008389 | UMOD  | chr16 | 20346803 | 20346842 |
| SMG | NM_001008389 | UMOD  | chr16 | 20347967 | 20348049 |
| SMG | NM_001008389 | UMOD  | chr16 | 20348612 | 20348775 |
| SMG | NM_001008389 | UMOD  | chr16 | 20352412 | 20352658 |
| SMG | NM_001008389 | UMOD  | chr16 | 20355345 | 20355494 |
| SMG | NM_001008389 | UMOD  | chr16 | 20357447 | 20357656 |
| SMG | NM_001008389 | UMOD  | chr16 | 20359544 | 20359652 |
| SMG | NM_001008389 | UMOD  | chr16 | 20359757 | 20360534 |
| SMG | NM_001008389 | UMOD  | chr16 | 20361971 | 20362098 |
| SMG | NM_001008389 | UMOD  | chr16 | 20364010 | 20364200 |
| LIT | NM_020818    | UNC79 | chr14 | 93799564 | 93799869 |
| LIT | NM_020818    | UNC79 | chr14 | 93934016 | 93934137 |
| LIT | NM_020818    | UNC79 | chr14 | 93940593 | 93940739 |
| LIT | NM_020818    | UNC79 | chr14 | 93943903 | 93944074 |
| LIT | NM_020818    | UNC79 | chr14 | 93954008 | 93954101 |
| LIT | NM_020818    | UNC79 | chr14 | 93962756 | 93962812 |
| LIT | NM_020818    | UNC79 | chr14 | 93963502 | 93963632 |
| LIT | NM_020818    | UNC79 | chr14 | 93990323 | 93990388 |
| LIT | NM_020818    | UNC79 | chr14 | 93994903 | 93994992 |
| LIT | NM_020818    | UNC79 | chr14 | 93995631 | 93995672 |
| LIT | NM_020818    | UNC79 | chr14 | 93998895 | 93998924 |
| LIT | NM_020818    | UNC79 | chr14 | 94004334 | 94004564 |
| LIT | NM_020818    | UNC79 | chr14 | 94007005 | 94007177 |
| LIT | NM_020818    | UNC79 | chr14 | 94008811 | 94009042 |
| LIT | NM_020818    | UNC79 | chr14 | 94038239 | 94038430 |
| LIT | NM_020818    | UNC79 | chr14 | 94039038 | 94039162 |
| LIT | NM_020818    | UNC79 | chr14 | 94041403 | 94041544 |
| LIT | NM_020818    | UNC79 | chr14 | 94044187 | 94044409 |
| LIT | NM_020818    | UNC79 | chr14 | 94046494 | 94046722 |

|     |           |        |       |          |          |
|-----|-----------|--------|-------|----------|----------|
| LIT | NM_020818 | UNC79  | chr14 | 94048548 | 94048690 |
| LIT | NM_020818 | UNC79  | chr14 | 94052941 | 94053021 |
| LIT | NM_020818 | UNC79  | chr14 | 94053105 | 94053254 |
| LIT | NM_020818 | UNC79  | chr14 | 94060025 | 94060183 |
| LIT | NM_020818 | UNC79  | chr14 | 94063704 | 94063886 |
| LIT | NM_020818 | UNC79  | chr14 | 94066914 | 94067116 |
| LIT | NM_020818 | UNC79  | chr14 | 94069584 | 94069764 |
| LIT | NM_020818 | UNC79  | chr14 | 94079142 | 94079429 |
| LIT | NM_020818 | UNC79  | chr14 | 94083467 | 94083650 |
| LIT | NM_020818 | UNC79  | chr14 | 94084537 | 94084700 |
| LIT | NM_020818 | UNC79  | chr14 | 94087966 | 94089187 |
| LIT | NM_020818 | UNC79  | chr14 | 94097146 | 94097254 |
| LIT | NM_020818 | UNC79  | chr14 | 94100866 | 94100983 |
| LIT | NM_020818 | UNC79  | chr14 | 94103561 | 94103645 |
| LIT | NM_020818 | UNC79  | chr14 | 94107490 | 94107593 |
| LIT | NM_020818 | UNC79  | chr14 | 94109902 | 94110043 |
| LIT | NM_020818 | UNC79  | chr14 | 94112953 | 94112992 |
| LIT | NM_020818 | UNC79  | chr14 | 94120087 | 94120200 |
| LIT | NM_020818 | UNC79  | chr14 | 94120285 | 94120371 |
| LIT | NM_020818 | UNC79  | chr14 | 94121579 | 94121753 |
| LIT | NM_020818 | UNC79  | chr14 | 94125538 | 94125607 |
| LIT | NM_020818 | UNC79  | chr14 | 94128949 | 94129060 |
| LIT | NM_020818 | UNC79  | chr14 | 94139696 | 94139801 |
| LIT | NM_020818 | UNC79  | chr14 | 94148962 | 94149040 |
| LIT | NM_020818 | UNC79  | chr14 | 94152917 | 94153007 |
| LIT | NM_020818 | UNC79  | chr14 | 94155010 | 94155186 |
| LIT | NM_020818 | UNC79  | chr14 | 94156462 | 94156649 |
| LIT | NM_020818 | UNC79  | chr14 | 94158094 | 94158292 |
| LIT | NM_020818 | UNC79  | chr14 | 94160680 | 94160758 |
| LIT | NM_020818 | UNC79  | chr14 | 94170970 | 94171012 |
| LIT | NM_020818 | UNC79  | chr14 | 94173049 | 94173689 |
| LIT | NM_003366 | UQCRC2 | chr16 | 21964608 | 21964777 |
| LIT | NM_003366 | UQCRC2 | chr16 | 21968555 | 21968639 |
| LIT | NM_003366 | UQCRC2 | chr16 | 21968737 | 21968887 |
| LIT | NM_003366 | UQCRC2 | chr16 | 21969855 | 21969920 |
| LIT | NM_003366 | UQCRC2 | chr16 | 21973780 | 21973837 |
| LIT | NM_003366 | UQCRC2 | chr16 | 21974081 | 21974206 |
| LIT | NM_003366 | UQCRC2 | chr16 | 21976728 | 21976826 |
| LIT | NM_003366 | UQCRC2 | chr16 | 21979948 | 21980006 |
| LIT | NM_003366 | UQCRC2 | chr16 | 21982845 | 21982941 |
| LIT | NM_003366 | UQCRC2 | chr16 | 21983243 | 21983443 |
| LIT | NM_003366 | UQCRC2 | chr16 | 21985216 | 21985297 |
| LIT | NM_003366 | UQCRC2 | chr16 | 21987487 | 21987564 |

|     |              |        |       |          |          |
|-----|--------------|--------|-------|----------|----------|
| LIT | NM_003366    | UQCRC2 | chr16 | 21991867 | 21992021 |
| LIT | NM_003366    | UQCRC2 | chr16 | 21994408 | 21994668 |
| CNV | NM_001252641 | URI1   | chr19 | 30414550 | 30414661 |
| CNV | NM_001252641 | URI1   | chr19 | 30462099 | 30462134 |
| CNV | NM_001252641 | URI1   | chr19 | 30476129 | 30476208 |
| CNV | NM_001252641 | URI1   | chr19 | 30477188 | 30477324 |
| CNV | NM_001252641 | URI1   | chr19 | 30496267 | 30496359 |
| CNV | NM_001252641 | URI1   | chr19 | 30496557 | 30496615 |
| CNV | NM_001252641 | URI1   | chr19 | 30498376 | 30498545 |
| CNV | NM_001252641 | URI1   | chr19 | 30499911 | 30500260 |
| CNV | NM_001252641 | URI1   | chr19 | 30502000 | 30502143 |
| CNV | NM_001252641 | URI1   | chr19 | 30503191 | 30503438 |
| CNV | NM_001252641 | URI1   | chr19 | 30506442 | 30507519 |
| CNV | NM_182488    | USP12  | chr13 | 27640286 | 27643521 |
| CNV | NM_182488    | USP12  | chr13 | 27645207 | 27645286 |
| CNV | NM_182488    | USP12  | chr13 | 27649327 | 27649525 |
| CNV | NM_182488    | USP12  | chr13 | 27664019 | 27664103 |
| CNV | NM_182488    | USP12  | chr13 | 27664218 | 27664295 |
| CNV | NM_182488    | USP12  | chr13 | 27669737 | 27669967 |
| CNV | NM_182488    | USP12  | chr13 | 27679867 | 27680081 |
| CNV | NM_182488    | USP12  | chr13 | 27690652 | 27690733 |
| CNV | NM_182488    | USP12  | chr13 | 27745728 | 27746033 |
| CNV | NM_001283042 | USP25  | chr21 | 17102343 | 17102757 |
| CNV | NM_001283042 | USP25  | chr21 | 17135209 | 17135287 |
| CNV | NM_001283042 | USP25  | chr21 | 17138315 | 17138460 |
| CNV | NM_001283042 | USP25  | chr21 | 17150222 | 17150346 |
| CNV | NM_001283042 | USP25  | chr21 | 17163820 | 17163983 |
| CNV | NM_001283042 | USP25  | chr21 | 17172075 | 17172162 |
| CNV | NM_001283042 | USP25  | chr21 | 17177439 | 17177577 |
| CNV | NM_001283042 | USP25  | chr21 | 17181127 | 17181204 |
| CNV | NM_001283042 | USP25  | chr21 | 17183455 | 17183529 |
| CNV | NM_001283042 | USP25  | chr21 | 17191016 | 17191165 |
| CNV | NM_001283042 | USP25  | chr21 | 17196357 | 17196485 |
| CNV | NM_001283042 | USP25  | chr21 | 17197284 | 17197380 |
| CNV | NM_001283042 | USP25  | chr21 | 17198522 | 17198684 |
| CNV | NM_001283042 | USP25  | chr21 | 17199295 | 17199522 |
| CNV | NM_001283042 | USP25  | chr21 | 17202849 | 17202920 |
| CNV | NM_001283042 | USP25  | chr21 | 17203719 | 17203948 |
| CNV | NM_001283042 | USP25  | chr21 | 17205666 | 17205867 |
| CNV | NM_001283042 | USP25  | chr21 | 17214716 | 17214859 |
| CNV | NM_001283042 | USP25  | chr21 | 17222095 | 17222191 |
| CNV | NM_001283042 | USP25  | chr21 | 17236586 | 17236765 |
| CNV | NM_001283042 | USP25  | chr21 | 17238584 | 17238663 |

|     |              |       |       |          |          |
|-----|--------------|-------|-------|----------|----------|
| CNV | NM_001283042 | USP25 | chr21 | 17242386 | 17242466 |
| CNV | NM_001283042 | USP25 | chr21 | 17246721 | 17246845 |
| CNV | NM_001283042 | USP25 | chr21 | 17250114 | 17250310 |
| CNV | NM_001283042 | USP25 | chr21 | 17250621 | 17252390 |
| SMG | NM_006537    | USP3  | chr15 | 63796709 | 63797029 |
| SMG | NM_006537    | USP3  | chr15 | 63824845 | 63824906 |
| SMG | NM_006537    | USP3  | chr15 | 63829223 | 63829355 |
| SMG | NM_006537    | USP3  | chr15 | 63845913 | 63845997 |
| SMG | NM_006537    | USP3  | chr15 | 63848865 | 63848947 |
| SMG | NM_006537    | USP3  | chr15 | 63850304 | 63850387 |
| SMG | NM_006537    | USP3  | chr15 | 63852055 | 63852169 |
| SMG | NM_006537    | USP3  | chr15 | 63855093 | 63855207 |
| SMG | NM_006537    | USP3  | chr15 | 63862631 | 63862778 |
| SMG | NM_006537    | USP3  | chr15 | 63866244 | 63866351 |
| SMG | NM_006537    | USP3  | chr15 | 63866521 | 63866602 |
| SMG | NM_006537    | USP3  | chr15 | 63880503 | 63880622 |
| SMG | NM_006537    | USP3  | chr15 | 63880900 | 63881014 |
| SMG | NM_006537    | USP3  | chr15 | 63881142 | 63881210 |
| SMG | NM_006537    | USP3  | chr15 | 63882859 | 63886839 |
| CNV | NM_001184823 | VDAC2 | chr10 | 76969911 | 76969970 |
| CNV | NM_001184823 | VDAC2 | chr10 | 76970891 | 76970947 |
| CNV | NM_001184823 | VDAC2 | chr10 | 76971987 | 76972056 |
| CNV | NM_001184823 | VDAC2 | chr10 | 76973778 | 76973828 |
| CNV | NM_001184823 | VDAC2 | chr10 | 76978820 | 76978973 |
| CNV | NM_001184823 | VDAC2 | chr10 | 76979061 | 76979114 |
| CNV | NM_001184823 | VDAC2 | chr10 | 76980500 | 76980728 |
| CNV | NM_001184823 | VDAC2 | chr10 | 76982009 | 76982160 |
| CNV | NM_001184823 | VDAC2 | chr10 | 76989401 | 76989459 |
| CNV | NM_001184823 | VDAC2 | chr10 | 76990655 | 76991207 |
| SMG | NM_001243733 | VEGFB | chr11 | 64002055 | 64002365 |
| SMG | NM_001243733 | VEGFB | chr11 | 64002929 | 64002972 |
| SMG | NM_001243733 | VEGFB | chr11 | 64003284 | 64003481 |
| SMG | NM_001243733 | VEGFB | chr11 | 64003725 | 64003799 |
| SMG | NM_001243733 | VEGFB | chr11 | 64004658 | 64004694 |
| SMG | NM_001243733 | VEGFB | chr11 | 64004992 | 64005127 |
| SMG | NM_001243733 | VEGFB | chr11 | 64005827 | 64006736 |
| SMG | NM_015873    | VILL  | chr3  | 38035077 | 38035223 |
| SMG | NM_015873    | VILL  | chr3  | 38035388 | 38035463 |
| SMG | NM_015873    | VILL  | chr3  | 38035751 | 38035957 |
| SMG | NM_015873    | VILL  | chr3  | 38037229 | 38037338 |
| SMG | NM_015873    | VILL  | chr3  | 38038567 | 38038678 |
| SMG | NM_015873    | VILL  | chr3  | 38038973 | 38039176 |
| SMG | NM_015873    | VILL  | chr3  | 38039580 | 38039659 |

|     |              |         |       |          |          |
|-----|--------------|---------|-------|----------|----------|
| SMG | NM_015873    | VILL    | chr3  | 38039756 | 38039855 |
| SMG | NM_015873    | VILL    | chr3  | 38040402 | 38040541 |
| SMG | NM_015873    | VILL    | chr3  | 38040829 | 38040930 |
| SMG | NM_015873    | VILL    | chr3  | 38042946 | 38043084 |
| SMG | NM_015873    | VILL    | chr3  | 38043192 | 38043351 |
| SMG | NM_015873    | VILL    | chr3  | 38043886 | 38044066 |
| SMG | NM_015873    | VILL    | chr3  | 38044658 | 38044804 |
| SMG | NM_015873    | VILL    | chr3  | 38045745 | 38045890 |
| SMG | NM_015873    | VILL    | chr3  | 38047282 | 38047465 |
| SMG | NM_015873    | VILL    | chr3  | 38047671 | 38047743 |
| SMG | NM_015873    | VILL    | chr3  | 38047939 | 38048191 |
| SMG | NM_015873    | VILL    | chr3  | 38048432 | 38048676 |
| SMG | NM_022479    | WBSCR17 | chr7  | 70597522 | 70598026 |
| SMG | NM_022479    | WBSCR17 | chr7  | 70800535 | 70800719 |
| SMG | NM_022479    | WBSCR17 | chr7  | 70853220 | 70853387 |
| SMG | NM_022479    | WBSCR17 | chr7  | 70880874 | 70881049 |
| SMG | NM_022479    | WBSCR17 | chr7  | 70885893 | 70886091 |
| SMG | NM_022479    | WBSCR17 | chr7  | 71036269 | 71036387 |
| SMG | NM_022479    | WBSCR17 | chr7  | 71130395 | 71130581 |
| SMG | NM_022479    | WBSCR17 | chr7  | 71134956 | 71135094 |
| SMG | NM_022479    | WBSCR17 | chr7  | 71142195 | 71142291 |
| SMG | NM_022479    | WBSCR17 | chr7  | 71175745 | 71175913 |
| SMG | NM_022479    | WBSCR17 | chr7  | 71177002 | 71178586 |
| SMG | NM_001080435 | WHAMM   | chr15 | 83478379 | 83479087 |
| SMG | NM_001080435 | WHAMM   | chr15 | 83481854 | 83482028 |
| SMG | NM_001080435 | WHAMM   | chr15 | 83485443 | 83485594 |
| SMG | NM_001080435 | WHAMM   | chr15 | 83486671 | 83486841 |
| SMG | NM_001080435 | WHAMM   | chr15 | 83488074 | 83488240 |
| SMG | NM_001080435 | WHAMM   | chr15 | 83491851 | 83492039 |
| SMG | NM_001080435 | WHAMM   | chr15 | 83495161 | 83495248 |
| SMG | NM_001080435 | WHAMM   | chr15 | 83495502 | 83495598 |
| SMG | NM_001080435 | WHAMM   | chr15 | 83499350 | 83499831 |
| SMG | NM_001080435 | WHAMM   | chr15 | 83501980 | 83503613 |
| CNV | NM_023034    | WHSC1L1 | chr8  | 38132560 | 38133400 |
| CNV | NM_023034    | WHSC1L1 | chr8  | 38133813 | 38134018 |
| CNV | NM_023034    | WHSC1L1 | chr8  | 38135823 | 38135930 |
| CNV | NM_023034    | WHSC1L1 | chr8  | 38137057 | 38137199 |
| CNV | NM_023034    | WHSC1L1 | chr8  | 38138984 | 38139101 |
| CNV | NM_023034    | WHSC1L1 | chr8  | 38146004 | 38146274 |
| CNV | NM_023034    | WHSC1L1 | chr8  | 38146910 | 38147023 |
| CNV | NM_023034    | WHSC1L1 | chr8  | 38147992 | 38148195 |
| CNV | NM_023034    | WHSC1L1 | chr8  | 38153313 | 38153470 |
| CNV | NM_023034    | WHSC1L1 | chr8  | 38156961 | 38157108 |



|     |              |         |       |           |           |
|-----|--------------|---------|-------|-----------|-----------|
| CNV | NM_023034    | WHSC1L1 | chr8  | 38162104  | 38162275  |
| CNV | NM_023034    | WHSC1L1 | chr8  | 38162765  | 38162963  |
| CNV | NM_023034    | WHSC1L1 | chr8  | 38172164  | 38172291  |
| CNV | NM_023034    | WHSC1L1 | chr8  | 38172933  | 38173062  |
| CNV | NM_023034    | WHSC1L1 | chr8  | 38173429  | 38173560  |
| CNV | NM_023034    | WHSC1L1 | chr8  | 38176412  | 38176458  |
| CNV | NM_023034    | WHSC1L1 | chr8  | 38178589  | 38178690  |
| CNV | NM_023034    | WHSC1L1 | chr8  | 38184247  | 38184374  |
| CNV | NM_023034    | WHSC1L1 | chr8  | 38186895  | 38187411  |
| CNV | NM_023034    | WHSC1L1 | chr8  | 38188948  | 38189103  |
| CNV | NM_023034    | WHSC1L1 | chr8  | 38194822  | 38194985  |
| CNV | NM_023034    | WHSC1L1 | chr8  | 38196053  | 38196125  |
| CNV | NM_023034    | WHSC1L1 | chr8  | 38205014  | 38205733  |
| CNV | NM_023034    | WHSC1L1 | chr8  | 38239316  | 38239790  |
| SMG | NM_004185    | WNT2B   | chr1  | 113010039 | 113010213 |
| SMG | NM_004185    | WNT2B   | chr1  | 113033632 | 113033703 |
| SMG | NM_004185    | WNT2B   | chr1  | 113057495 | 113057716 |
| SMG | NM_004185    | WNT2B   | chr1  | 113058761 | 113059039 |
| SMG | NM_004185    | WNT2B   | chr1  | 113059742 | 113060007 |
| SMG | NM_004185    | WNT2B   | chr1  | 113062901 | 113063910 |
| CNV | NM_016373    | WWOX    | chr16 | 78133326  | 78133782  |
| CNV | NM_016373    | WWOX    | chr16 | 78142319  | 78142384  |
| CNV | NM_016373    | WWOX    | chr16 | 78143674  | 78143732  |
| CNV | NM_016373    | WWOX    | chr16 | 78148872  | 78149051  |
| CNV | NM_016373    | WWOX    | chr16 | 78198079  | 78198186  |
| CNV | NM_016373    | WWOX    | chr16 | 78420756  | 78420845  |
| CNV | NM_016373    | WWOX    | chr16 | 78458766  | 78458952  |
| CNV | NM_016373    | WWOX    | chr16 | 78466384  | 78466649  |
| CNV | NM_016373    | WWOX    | chr16 | 79245504  | 79246564  |
| CNV | NM_001079810 | XIRP2   | chr2  | 167744996 | 167745067 |
| CNV | NM_001079810 | XIRP2   | chr2  | 167759974 | 167760400 |
| CNV | NM_001079810 | XIRP2   | chr2  | 167992418 | 167992572 |
| CNV | NM_001079810 | XIRP2   | chr2  | 168067244 | 168067405 |
| CNV | NM_001079810 | XIRP2   | chr2  | 168074675 | 168074810 |
| CNV | NM_001079810 | XIRP2   | chr2  | 168096364 | 168096475 |
| CNV | NM_001079810 | XIRP2   | chr2  | 168097173 | 168097246 |
| CNV | NM_001079810 | XIRP2   | chr2  | 168098286 | 168098420 |
| CNV | NM_001079810 | XIRP2   | chr2  | 168110541 | 168110675 |
| CNV | NM_001079810 | XIRP2   | chr2  | 168114366 | 168116261 |
| SMG | NM_004559    | YBX1    | chr1  | 43148065  | 43148402  |
| SMG | NM_004559    | YBX1    | chr1  | 43149073  | 43149137  |
| SMG | NM_004559    | YBX1    | chr1  | 43159160  | 43159194  |
| SMG | NM_004559    | YBX1    | chr1  | 43161869  | 43161959  |

|     |              |        |       |           |           |
|-----|--------------|--------|-------|-----------|-----------|
| SMG | NM_004559    | YBX1   | chr1  | 43162312  | 43162615  |
| SMG | NM_004559    | YBX1   | chr1  | 43162850  | 43162933  |
| SMG | NM_004559    | YBX1   | chr1  | 43166451  | 43166717  |
| SMG | NM_004559    | YBX1   | chr1  | 43167651  | 43168020  |
| SMG | NM_025224    | ZBTB46 | chr20 | 62375020  | 62378654  |
| SMG | NM_025224    | ZBTB46 | chr20 | 62384038  | 62384214  |
| SMG | NM_025224    | ZBTB46 | chr20 | 62407030  | 62407315  |
| SMG | NM_025224    | ZBTB46 | chr20 | 62421173  | 62422143  |
| SMG | NM_025224    | ZBTB46 | chr20 | 62436688  | 62436856  |
| SMG | NM_001039360 | ZBTB7C | chr18 | 45553638  | 45556282  |
| SMG | NM_001039360 | ZBTB7C | chr18 | 45566270  | 45567494  |
| SMG | NM_001039360 | ZBTB7C | chr18 | 45663377  | 45663680  |
| SMG | NM_015070    | ZC3H13 | chr13 | 46536313  | 46538177  |
| SMG | NM_015070    | ZC3H13 | chr13 | 46539414  | 46539567  |
| SMG | NM_015070    | ZC3H13 | chr13 | 46541638  | 46542163  |
| SMG | NM_015070    | ZC3H13 | chr13 | 46542882  | 46544106  |
| SMG | NM_015070    | ZC3H13 | chr13 | 46544496  | 46544600  |
| SMG | NM_015070    | ZC3H13 | chr13 | 46549417  | 46549973  |
| SMG | NM_015070    | ZC3H13 | chr13 | 46553947  | 46554139  |
| SMG | NM_015070    | ZC3H13 | chr13 | 46559431  | 46559896  |
| SMG | NM_015070    | ZC3H13 | chr13 | 46562921  | 46563232  |
| SMG | NM_015070    | ZC3H13 | chr13 | 46577273  | 46577471  |
| SMG | NM_015070    | ZC3H13 | chr13 | 46584482  | 46584640  |
| SMG | NM_015070    | ZC3H13 | chr13 | 46585549  | 46585689  |
| SMG | NM_015070    | ZC3H13 | chr13 | 46594583  | 46594692  |
| SMG | NM_015070    | ZC3H13 | chr13 | 46616298  | 46616410  |
| SMG | NM_015070    | ZC3H13 | chr13 | 46619089  | 46619199  |
| SMG | NM_015070    | ZC3H13 | chr13 | 46619525  | 46619651  |
| SMG | NM_015070    | ZC3H13 | chr13 | 46626832  | 46626896  |
| LIT | NM_015117    | ZC3H3  | chr8  | 144519824 | 144520257 |
| LIT | NM_015117    | ZC3H3  | chr8  | 144522210 | 144522533 |
| LIT | NM_015117    | ZC3H3  | chr8  | 144523105 | 144523290 |
| LIT | NM_015117    | ZC3H3  | chr8  | 144547886 | 144548018 |
| LIT | NM_015117    | ZC3H3  | chr8  | 144550378 | 144550448 |
| LIT | NM_015117    | ZC3H3  | chr8  | 144550551 | 144550710 |
| LIT | NM_015117    | ZC3H3  | chr8  | 144550786 | 144550829 |
| LIT | NM_015117    | ZC3H3  | chr8  | 144557567 | 144557755 |
| LIT | NM_015117    | ZC3H3  | chr8  | 144589915 | 144590069 |
| LIT | NM_015117    | ZC3H3  | chr8  | 144618426 | 144618623 |
| LIT | NM_015117    | ZC3H3  | chr8  | 144620172 | 144621490 |
| LIT | NM_015117    | ZC3H3  | chr8  | 144623545 | 144623620 |
| SMG | NM_017590    | ZC3H7B | chr22 | 41697506  | 41697776  |
| SMG | NM_017590    | ZC3H7B | chr22 | 41716658  | 41716717  |

|     |              |        |       |           |           |
|-----|--------------|--------|-------|-----------|-----------|
| SMG | NM_017590    | ZC3H7B | chr22 | 41721567  | 41721601  |
| SMG | NM_017590    | ZC3H7B | chr22 | 41721724  | 41721922  |
| SMG | NM_017590    | ZC3H7B | chr22 | 41723209  | 41723368  |
| SMG | NM_017590    | ZC3H7B | chr22 | 41726026  | 41726107  |
| SMG | NM_017590    | ZC3H7B | chr22 | 41728174  | 41728231  |
| SMG | NM_017590    | ZC3H7B | chr22 | 41734316  | 41734359  |
| SMG | NM_017590    | ZC3H7B | chr22 | 41735004  | 41735195  |
| SMG | NM_017590    | ZC3H7B | chr22 | 41735819  | 41736141  |
| SMG | NM_017590    | ZC3H7B | chr22 | 41737091  | 41737150  |
| SMG | NM_017590    | ZC3H7B | chr22 | 41738532  | 41738632  |
| SMG | NM_017590    | ZC3H7B | chr22 | 41739418  | 41739580  |
| SMG | NM_017590    | ZC3H7B | chr22 | 41742006  | 41742212  |
| SMG | NM_017590    | ZC3H7B | chr22 | 41744070  | 41744171  |
| SMG | NM_017590    | ZC3H7B | chr22 | 41745123  | 41745305  |
| SMG | NM_017590    | ZC3H7B | chr22 | 41747564  | 41747650  |
| SMG | NM_017590    | ZC3H7B | chr22 | 41751472  | 41751606  |
| SMG | NM_017590    | ZC3H7B | chr22 | 41751760  | 41751866  |
| SMG | NM_017590    | ZC3H7B | chr22 | 41751957  | 41752066  |
| SMG | NM_017590    | ZC3H7B | chr22 | 41752346  | 41752480  |
| SMG | NM_017590    | ZC3H7B | chr22 | 41752648  | 41752812  |
| SMG | NM_017590    | ZC3H7B | chr22 | 41753180  | 41756151  |
| CNV | NM_001171653 | ZEB2   | chr2  | 145141941 | 145147595 |
| CNV | NM_001171653 | ZEB2   | chr2  | 145153978 | 145154159 |
| CNV | NM_001171653 | ZEB2   | chr2  | 145155867 | 145157837 |
| CNV | NM_001171653 | ZEB2   | chr2  | 145158765 | 145158874 |
| CNV | NM_001171653 | ZEB2   | chr2  | 145161482 | 145161697 |
| CNV | NM_001171653 | ZEB2   | chr2  | 145162402 | 145162591 |
| CNV | NM_001171653 | ZEB2   | chr2  | 145187335 | 145187593 |
| CNV | NM_001171653 | ZEB2   | chr2  | 145274844 | 145274986 |
| CNV | NM_001171653 | ZEB2   | chr2  | 145277505 | 145277958 |
| SMG | NM_153018    | ZFP3   | chr17 | 4981753   | 4981870   |
| SMG | NM_153018    | ZFP3   | chr17 | 4994791   | 4999669   |
| SMG | NM_133458    | ZFP90  | chr16 | 68573660  | 68573728  |
| SMG | NM_133458    | ZFP90  | chr16 | 68591900  | 68592027  |
| SMG | NM_133458    | ZFP90  | chr16 | 68592375  | 68592471  |
| SMG | NM_133458    | ZFP90  | chr16 | 68596946  | 68601039  |
| SMG | NM_012082    | ZFPM2  | chr8  | 106331146 | 106331209 |
| SMG | NM_012082    | ZFPM2  | chr8  | 106431371 | 106431530 |
| SMG | NM_012082    | ZFPM2  | chr8  | 106456507 | 106456609 |
| SMG | NM_012082    | ZFPM2  | chr8  | 106573590 | 106573709 |
| SMG | NM_012082    | ZFPM2  | chr8  | 106646473 | 106646585 |
| SMG | NM_012082    | ZFPM2  | chr8  | 106800945 | 106801152 |
| SMG | NM_012082    | ZFPM2  | chr8  | 106810951 | 106811176 |

|     |           |         |       |           |           |
|-----|-----------|---------|-------|-----------|-----------|
| SMG | NM_012082 | ZFPM2   | chr8  | 106813274 | 106816767 |
| SMG | NM_052882 | ZIM3    | chr19 | 57645463  | 57647463  |
| SMG | NM_052882 | ZIM3    | chr19 | 57648240  | 57648339  |
| SMG | NM_052882 | ZIM3    | chr19 | 57649839  | 57649966  |
| SMG | NM_052882 | ZIM3    | chr19 | 57653996  | 57654053  |
| SMG | NM_052882 | ZIM3    | chr19 | 57656226  | 57656570  |
| SMG | NM_003439 | ZKSCAN1 | chr7  | 99613218  | 99613349  |
| SMG | NM_003439 | ZKSCAN1 | chr7  | 99621041  | 99621555  |
| SMG | NM_003439 | ZKSCAN1 | chr7  | 99621776  | 99621930  |
| SMG | NM_003439 | ZKSCAN1 | chr7  | 99627483  | 99627575  |
| SMG | NM_003439 | ZKSCAN1 | chr7  | 99627871  | 99627998  |
| SMG | NM_003439 | ZKSCAN1 | chr7  | 99630927  | 99635403  |
| SMG | NM_018651 | ZKSCAN7 | chr3  | 44596712  | 44597010  |
| SMG | NM_018651 | ZKSCAN7 | chr3  | 44598421  | 44598962  |
| SMG | NM_018651 | ZKSCAN7 | chr3  | 44606978  | 44607147  |
| SMG | NM_018651 | ZKSCAN7 | chr3  | 44609403  | 44609495  |
| SMG | NM_018651 | ZKSCAN7 | chr3  | 44609798  | 44609925  |
| SMG | NM_018651 | ZKSCAN7 | chr3  | 44611413  | 44613650  |
| CNV | NM_020338 | ZMIZ1   | chr10 | 80828791  | 80829027  |
| CNV | NM_020338 | ZMIZ1   | chr10 | 80878671  | 80878781  |
| CNV | NM_020338 | ZMIZ1   | chr10 | 80899438  | 80899534  |
| CNV | NM_020338 | ZMIZ1   | chr10 | 80921809  | 80921890  |
| CNV | NM_020338 | ZMIZ1   | chr10 | 80961340  | 80961449  |
| CNV | NM_020338 | ZMIZ1   | chr10 | 80968092  | 80968206  |
| CNV | NM_020338 | ZMIZ1   | chr10 | 80975925  | 80976031  |
| CNV | NM_020338 | ZMIZ1   | chr10 | 81036937  | 81037082  |
| CNV | NM_020338 | ZMIZ1   | chr10 | 81049531  | 81049646  |
| CNV | NM_020338 | ZMIZ1   | chr10 | 81050715  | 81050933  |
| CNV | NM_020338 | ZMIZ1   | chr10 | 81051914  | 81052113  |
| CNV | NM_020338 | ZMIZ1   | chr10 | 81053137  | 81053410  |
| CNV | NM_020338 | ZMIZ1   | chr10 | 81056227  | 81056410  |
| CNV | NM_020338 | ZMIZ1   | chr10 | 81057369  | 81057447  |
| CNV | NM_020338 | ZMIZ1   | chr10 | 81058162  | 81058337  |
| CNV | NM_020338 | ZMIZ1   | chr10 | 81058806  | 81058948  |
| CNV | NM_020338 | ZMIZ1   | chr10 | 81060488  | 81060699  |
| CNV | NM_020338 | ZMIZ1   | chr10 | 81061863  | 81061969  |
| CNV | NM_020338 | ZMIZ1   | chr10 | 81063771  | 81063932  |
| CNV | NM_020338 | ZMIZ1   | chr10 | 81064920  | 81064988  |
| CNV | NM_020338 | ZMIZ1   | chr10 | 81065289  | 81065358  |
| CNV | NM_020338 | ZMIZ1   | chr10 | 81065856  | 81066101  |
| CNV | NM_020338 | ZMIZ1   | chr10 | 81067161  | 81067328  |
| CNV | NM_020338 | ZMIZ1   | chr10 | 81070680  | 81070941  |
| CNV | NM_020338 | ZMIZ1   | chr10 | 81072398  | 81072625  |

|     |              |         |       |          |          |
|-----|--------------|---------|-------|----------|----------|
| LIT | NM_001281771 | ZMYND8  | chr20 | 45837858 | 45839542 |
| LIT | NM_001281771 | ZMYND8  | chr20 | 45848908 | 45848975 |
| LIT | NM_001281771 | ZMYND8  | chr20 | 45849964 | 45850125 |
| LIT | NM_001281771 | ZMYND8  | chr20 | 45852969 | 45853209 |
| LIT | NM_001281771 | ZMYND8  | chr20 | 45855945 | 45856024 |
| LIT | NM_001281771 | ZMYND8  | chr20 | 45858471 | 45858552 |
| LIT | NM_001281771 | ZMYND8  | chr20 | 45865069 | 45865260 |
| LIT | NM_001281771 | ZMYND8  | chr20 | 45874751 | 45875261 |
| LIT | NM_001281771 | ZMYND8  | chr20 | 45878030 | 45878183 |
| LIT | NM_001281771 | ZMYND8  | chr20 | 45891031 | 45891172 |
| LIT | NM_001281771 | ZMYND8  | chr20 | 45905057 | 45905539 |
| LIT | NM_001281771 | ZMYND8  | chr20 | 45910845 | 45910961 |
| LIT | NM_001281771 | ZMYND8  | chr20 | 45912314 | 45912392 |
| LIT | NM_001281771 | ZMYND8  | chr20 | 45915972 | 45916028 |
| LIT | NM_001281771 | ZMYND8  | chr20 | 45918930 | 45919018 |
| LIT | NM_001281771 | ZMYND8  | chr20 | 45920539 | 45920632 |
| LIT | NM_001281771 | ZMYND8  | chr20 | 45923409 | 45923523 |
| LIT | NM_001281771 | ZMYND8  | chr20 | 45927472 | 45927616 |
| LIT | NM_001281771 | ZMYND8  | chr20 | 45938799 | 45938948 |
| LIT | NM_001281771 | ZMYND8  | chr20 | 45976599 | 45976670 |
| LIT | NM_001281771 | ZMYND8  | chr20 | 45985400 | 45985633 |
| SMG | NM_006963    | ZNF22   | chr10 | 45496272 | 45496426 |
| SMG | NM_006963    | ZNF22   | chr10 | 45498727 | 45500777 |
| CNV | NM_001278661 | ZNF254  | chr19 | 24216206 | 24216423 |
| CNV | NM_001278661 | ZNF254  | chr19 | 24228985 | 24229081 |
| CNV | NM_001278661 | ZNF254  | chr19 | 24288741 | 24288868 |
| CNV | NM_001278661 | ZNF254  | chr19 | 24289349 | 24289445 |
| CNV | NM_001278661 | ZNF254  | chr19 | 24309055 | 24312769 |
| SMG | NM_182976    | ZNF326  | chr1  | 90460677 | 90460832 |
| SMG | NM_182976    | ZNF326  | chr1  | 90463668 | 90463713 |
| SMG | NM_182976    | ZNF326  | chr1  | 90470561 | 90470597 |
| SMG | NM_182976    | ZNF326  | chr1  | 90470691 | 90470803 |
| SMG | NM_182976    | ZNF326  | chr1  | 90472903 | 90473309 |
| SMG | NM_182976    | ZNF326  | chr1  | 90475646 | 90475845 |
| SMG | NM_182976    | ZNF326  | chr1  | 90478684 | 90478796 |
| SMG | NM_182976    | ZNF326  | chr1  | 90482875 | 90483023 |
| SMG | NM_182976    | ZNF326  | chr1  | 90484243 | 90484343 |
| SMG | NM_182976    | ZNF326  | chr1  | 90486350 | 90486481 |
| SMG | NM_182976    | ZNF326  | chr1  | 90487808 | 90487904 |
| SMG | NM_182976    | ZNF326  | chr1  | 90492912 | 90494094 |
| SMG | NM_001130967 | ZNF385A | chr12 | 54762919 | 54764270 |
| SMG | NM_001130967 | ZNF385A | chr12 | 54764409 | 54764505 |
| SMG | NM_001130967 | ZNF385A | chr12 | 54764710 | 54764880 |

|     |              |         |       |          |          |
|-----|--------------|---------|-------|----------|----------|
| SMG | NM_001130967 | ZNF385A | chr12 | 54765256 | 54765499 |
| SMG | NM_001130967 | ZNF385A | chr12 | 54767756 | 54767919 |
| SMG | NM_001130967 | ZNF385A | chr12 | 54769627 | 54769738 |
| SMG | NM_001130967 | ZNF385A | chr12 | 54778211 | 54778348 |
| SMG | NM_001130967 | ZNF385A | chr12 | 54785018 | 54785083 |
| CNV | NM_024697    | ZNF385D | chr3  | 21462489 | 21462939 |
| CNV | NM_024697    | ZNF385D | chr3  | 21465454 | 21465556 |
| CNV | NM_024697    | ZNF385D | chr3  | 21466983 | 21467162 |
| CNV | NM_024697    | ZNF385D | chr3  | 21478461 | 21478695 |
| CNV | NM_024697    | ZNF385D | chr3  | 21552352 | 21552515 |
| CNV | NM_024697    | ZNF385D | chr3  | 21606065 | 21606176 |
| CNV | NM_024697    | ZNF385D | chr3  | 21706377 | 21706520 |
| CNV | NM_024697    | ZNF385D | chr3  | 21792386 | 21792816 |
| SMG | NM_018660    | ZNF395  | chr8  | 28203101 | 28206347 |
| SMG | NM_018660    | ZNF395  | chr8  | 28206641 | 28206745 |
| SMG | NM_018660    | ZNF395  | chr8  | 28207580 | 28207673 |
| SMG | NM_018660    | ZNF395  | chr8  | 28209011 | 28209324 |
| SMG | NM_018660    | ZNF395  | chr8  | 28210089 | 28210190 |
| SMG | NM_018660    | ZNF395  | chr8  | 28210689 | 28210925 |
| SMG | NM_018660    | ZNF395  | chr8  | 28214186 | 28214296 |
| SMG | NM_018660    | ZNF395  | chr8  | 28217108 | 28217341 |
| SMG | NM_018660    | ZNF395  | chr8  | 28218401 | 28218699 |
| SMG | NM_018660    | ZNF395  | chr8  | 28243909 | 28243977 |
| LIT | NM_030824    | ZNF442  | chr19 | 12460184 | 12462132 |
| LIT | NM_030824    | ZNF442  | chr19 | 12462823 | 12462884 |
| LIT | NM_030824    | ZNF442  | chr19 | 12463801 | 12463928 |
| LIT | NM_030824    | ZNF442  | chr19 | 12474367 | 12474485 |
| LIT | NM_030824    | ZNF442  | chr19 | 12475615 | 12476057 |
| LIT | NM_030824    | ZNF442  | chr19 | 12476346 | 12476475 |
| SMG | NM_052852    | ZNF486  | chr19 | 20278022 | 20278169 |
| SMG | NM_052852    | ZNF486  | chr19 | 20295164 | 20295291 |
| SMG | NM_052852    | ZNF486  | chr19 | 20296795 | 20296891 |
| SMG | NM_052852    | ZNF486  | chr19 | 20307772 | 20311299 |
| CNV | NM_014717    | ZNF536  | chr19 | 30863327 | 30863463 |
| CNV | NM_014717    | ZNF536  | chr19 | 30934467 | 30936639 |
| CNV | NM_014717    | ZNF536  | chr19 | 31025753 | 31025906 |
| CNV | NM_014717    | ZNF536  | chr19 | 31038849 | 31040421 |
| CNV | NM_014717    | ZNF536  | chr19 | 31048063 | 31048965 |
| SMG | NM_152655    | ZNF585A | chr19 | 37641000 | 37644508 |
| SMG | NM_152655    | ZNF585A | chr19 | 37646766 | 37646859 |
| SMG | NM_152655    | ZNF585A | chr19 | 37647130 | 37647257 |
| SMG | NM_152655    | ZNF585A | chr19 | 37656496 | 37656598 |
| SMG | NM_152655    | ZNF585A | chr19 | 37660740 | 37660956 |

|     |              |         |       |           |           |
|-----|--------------|---------|-------|-----------|-----------|
| SMG | NM_152655    | ZNF585A | chr19 | 37663528  | 37663615  |
| SMG | NM_015871    | ZNF593  | chr1  | 26496387  | 26496674  |
| SMG | NM_015871    | ZNF593  | chr1  | 26496908  | 26496971  |
| SMG | NM_015871    | ZNF593  | chr1  | 26497065  | 26497364  |
| SMG | NM_001145082 | ZNF619  | chr3  | 40518603  | 40518848  |
| SMG | NM_001145082 | ZNF619  | chr3  | 40519408  | 40519494  |
| SMG | NM_001145082 | ZNF619  | chr3  | 40523353  | 40523507  |
| SMG | NM_001145082 | ZNF619  | chr3  | 40523720  | 40523840  |
| SMG | NM_001145082 | ZNF619  | chr3  | 40524078  | 40524195  |
| SMG | NM_001145082 | ZNF619  | chr3  | 40528296  | 40531728  |
| SMG | NM_020787    | ZNF624  | chr17 | 16524047  | 16527823  |
| SMG | NM_020787    | ZNF624  | chr17 | 16537175  | 16537271  |
| SMG | NM_020787    | ZNF624  | chr17 | 16537943  | 16538070  |
| SMG | NM_020787    | ZNF624  | chr17 | 16550642  | 16550708  |
| SMG | NM_020787    | ZNF624  | chr17 | 16552971  | 16553060  |
| SMG | NM_020787    | ZNF624  | chr17 | 16557077  | 16557167  |
| SMG | NM_001267709 | ZNF706  | chr8  | 102209265 | 102211467 |
| SMG | NM_001267709 | ZNF706  | chr8  | 102212217 | 102212325 |
| SMG | NM_001267709 | ZNF706  | chr8  | 102213834 | 102213971 |
| SMG | NM_001267709 | ZNF706  | chr8  | 102218081 | 102218292 |
| LIT | NM_031218    | ZNF93   | chr19 | 20011721  | 20011900  |
| LIT | NM_031218    | ZNF93   | chr19 | 20026088  | 20026215  |
| LIT | NM_031218    | ZNF93   | chr19 | 20027368  | 20027464  |
| LIT | NM_031218    | ZNF93   | chr19 | 20043990  | 20046382  |
| SMG | NM_001170670 | ZNHIT6  | chr1  | 86115105  | 86119781  |
| SMG | NM_001170670 | ZNHIT6  | chr1  | 86123529  | 86123654  |
| SMG | NM_001170670 | ZNHIT6  | chr1  | 86142918  | 86142996  |
| SMG | NM_001170670 | ZNHIT6  | chr1  | 86144383  | 86144464  |
| SMG | NM_001170670 | ZNHIT6  | chr1  | 86146518  | 86146587  |
| SMG | NM_001170670 | ZNHIT6  | chr1  | 86167839  | 86167943  |
| SMG | NM_001170670 | ZNHIT6  | chr1  | 86171760  | 86171846  |
| SMG | NM_001170670 | ZNHIT6  | chr1  | 86171931  | 86172038  |
| SMG | NM_001170670 | ZNHIT6  | chr1  | 86172124  | 86172190  |
| SMG | NM_001170670 | ZNHIT6  | chr1  | 86173311  | 86173619  |
| SMG | NM_001170670 | ZNHIT6  | chr1  | 86173736  | 86174116  |
| SMG | NM_175056    | ZPLD1   | chr3  | 102153858 | 102153998 |
| SMG | NM_175056    | ZPLD1   | chr3  | 102157323 | 102157437 |
| SMG | NM_175056    | ZPLD1   | chr3  | 102171762 | 102171983 |
| SMG | NM_175056    | ZPLD1   | chr3  | 102175036 | 102175218 |
| SMG | NM_175056    | ZPLD1   | chr3  | 102176624 | 102176697 |
| SMG | NM_175056    | ZPLD1   | chr3  | 102181124 | 102181222 |
| SMG | NM_175056    | ZPLD1   | chr3  | 102183014 | 102183095 |
| SMG | NM_175056    | ZPLD1   | chr3  | 102187807 | 102187979 |

|     |           |       |      |           |           |
|-----|-----------|-------|------|-----------|-----------|
| SMG | NM_175056 | ZPLD1 | chr3 | 102189237 | 102189346 |
| SMG | NM_175056 | ZPLD1 | chr3 | 102195855 | 102195885 |
| SMG | NM_175056 | ZPLD1 | chr3 | 102196286 | 102198685 |

---
